# Supplementary material for: Multi-cohort cerebrospinal fluid proteomics identifies robust molecular signatures for asymptomatic and symptomatic Alzheimer’s disease.
Source: Research Square preprint supplement (doi:10.21203/rs.3.rs-3631708/v1), 2024-02-16
Supplement: Supplementary file 2 [file 809df032928a31df939eb0c5.xlsx]

## Sheet: ST1_Discovery_DAA
Supplementary Table 1: Differential Abundance Analysis of discovery cohort (Knight-ADRC + FACE).
Analyte	Target	EntrezGeneSymbol	Estimate	Standard_error	Pvalue	FDR	bonferroni	diffexpressed
X5694.57	SMOC1	SMOC1	0.183469	0.00518156	3.92808e-185	2.76104e-181	2.76104e-181	Significant
X4179.57	14-3-3 protein gamma	YWHAG	0.221821	0.00632764	1.15874e-182	4.0724e-179	8.1448e-179	Significant
X12853.112	TMOD2	TMOD2	0.0485709	0.00143803	1.6574e-172	3.88328e-169	1.16498e-168	Significant
X12414.31	14-3-3 protein beta/alpha	YWHAB	0.152598	0.00482279	1.00908e-157	1.7732e-154	7.0928e-154	Significant
X15545.13	Calcineurin B a	PPP3R1	0.109961	0.00359977	1.24394e-149	1.74874e-146	8.74368e-146	Significant
X13118.5	SMOC1	SMOC1	0.115941	0.00381365	1.12145e-148	1.31378e-145	7.88267e-145	Significant
X12861.13	TMOD3	TMOD3	0.112594	0.0038682	3.18489e-139	3.19808e-136	2.23866e-135	Significant
X19620.16	DLG2	DLG2	0.133714	0.00461113	1.95666e-138	1.71917e-135	1.37534e-134	Significant
X5858.6	14-3-3 protein zeta/delta	YWHAZ	0.133494	0.00463217	2.59653e-137	2.02789e-134	1.8251e-133	Significant
X14157.21	14-3-3E	YWHAE	0.11635	0.00406362	6.17449e-136	4.34005e-133	4.34005e-132	Significant
X16885.49	MARE3	MAPRE3	0.0990509	0.00359709	1.07637e-127	6.87799e-125	7.56579e-124	Significant
X25219.17	VATF	ATP6V1F	0.0815698	0.00301062	1.08168e-124	6.33593e-122	7.60311e-121	Significant
X19229.92	HOME1	HOMER1	0.0587869	0.0022184	3.4875e-120	1.88566e-117	2.45136e-116	Significant
X15474.7	PIN1	PIN1	0.0704592	0.00268862	2.33323e-118	1.17145e-115	1.64002e-114	Significant
X22430.15	CHIN	CHN1	0.0622066	0.00237829	1.75786e-117	8.23732e-115	1.2356e-113	Significant
X24717.26	PTPA	PTPA	0.135961	0.00525531	3.34962e-116	1.47153e-113	2.35445e-112	Significant
X14675.20	IF4B	EIF4B	0.0465743	0.00180965	8.77103e-115	3.62656e-112	6.16516e-111	Significant
X21140.19	CAMLG	CAMLG	0.0469845	0.00183897	1.28661e-113	5.02422e-111	9.04359e-110	Significant
X17706.4	PPR1A	PPP1R1A	0.0866159	0.00339251	1.49572e-113	5.53338e-111	1.05134e-109	Significant
X14156.33	14-3-3 protein beta/alpha	YWHAB	0.118099	0.00471381	1.77964e-110	6.25453e-108	1.25091e-106	Significant
X22968.9	GGE2D	GAGE2D	0.0774775	0.00310714	4.34895e-109	1.45566e-106	3.05688e-105	Significant
X24637.3	TCAL5	TCEAL5	0.138584	0.00571746	1.20069e-104	3.8362e-102	8.43964e-101	Significant
X18930.28	SLIT2	SLIT2	0.118948	0.00506542	1.84595e-99	5.52994e-97	1.29752e-95	Significant
X23677.30	SPN90	NCKIPSD	0.0395806	0.00168236	1.88816e-99	5.52994e-97	1.32719e-95	Significant
X4903.72	Calcineurin	PPP3CA|PPP3R1	0.168319	0.00727453	3.86302e-97	1.08613e-94	2.71532e-93	Significant
X20956.13	PFD4	PFDN4	0.0387777	0.00169967	6.49227e-95	1.75516e-92	4.56341e-91	Significant
X18303.39	NEUG	NRGN	0.185051	0.00822344	6.71541e-93	1.74824e-90	4.72026e-89	Significant
X8901.40	14-3-3 protein gamma	YWHAG	0.13081	0.00586582	1.81133e-91	4.54708e-89	1.27318e-87	Significant
X15325.14	NEUM	GAP43	0.149938	0.00674575	5.62965e-91	1.36451e-88	3.95708e-87	Significant
X10900.272	STMN2	STMN2	0.11267	0.00507548	9.23258e-91	2.16319e-88	6.48958e-87	Significant
X3905.62	UBE2N	UBE2N	0.0890615	0.00401714	1.20067e-90	2.72243e-88	8.43953e-87	Significant
X21667.57	PDE1B	PDE1B	0.0704975	0.00319748	1.06545e-89	2.34033e-87	7.48906e-86	Significant
X21173.25	ELAV2	ELAVL2	0.0844342	0.00386267	2.23447e-88	4.75942e-86	1.57061e-84	Significant
X20197.14	VISL1	VSNL1	0.106366	0.00487197	2.75724e-88	5.70019e-86	1.93807e-84	Significant
X23528.199	PHIPL	PHYHIPL	0.109558	0.00505926	3.83989e-87	7.7116e-85	2.69906e-83	Significant
X19113.66	SH3L2	SH3BGRL2	0.126145	0.00583266	5.6915e-87	1.11127e-84	4.00055e-83	Significant
X11354.21	Phospholipase C-beta-1	PLCB1	0.1473	0.00684049	2.51595e-86	4.77962e-84	1.76846e-82	Significant
X19112.2	TCAL3	TCEAL3	0.039735	0.00184225	3.28413e-86	6.07477e-84	2.30841e-82	Significant
X13242.134	SHAN3	SHANK3	0.0591048	0.0027491	4.96e-86	8.93944e-84	3.48638e-82	Significant
X8358.30	Peroxiredoxin-3	PRDX3	0.0810216	0.00378516	1.69231e-85	2.97381e-83	1.18953e-81	Significant
X21747.8	UBE2N/UB2V1 Complex	UBE2N|UBE2V1	0.107557	0.00502949	1.95546e-85	3.35243e-83	1.37449e-81	Significant
X13522.20	VISL1	VSNL1	0.0804419	0.00376251	2.7606e-85	4.62007e-83	1.94043e-81	Significant
X22037.47	EFHD2	EFHD2	0.0794808	0.00372729	8.17765e-85	1.33676e-82	5.74807e-81	Significant
X17781.191	MLP3A	MAP1LC3A	0.0904787	0.00425232	1.06226e-84	1.69696e-82	7.46665e-81	Significant
X9099.19	SYT5	SYT5	0.0836776	0.00392795	1.15251e-84	1.80022e-82	8.10097e-81	Significant
X17704.74	HS105	HSPH1	0.0295029	0.00138732	1.47342e-84	2.25145e-82	1.03567e-80	Significant
X12517.52	TFAR19	PDCD5	0.105722	0.00499907	7.9356e-84	1.18679e-81	5.57793e-80	Significant
X11476.43	VPS4A	VPS4A	0.0353476	0.0016733	1.90273e-83	2.78631e-81	1.33743e-79	Significant
X11557.3	SMUF1	SMURF1	0.0295545	0.00140858	1.23398e-82	1.77013e-80	8.67365e-79	Significant
X8070.88	DLG4	DLG4	0.04356	0.00207696	2.46419e-82	3.46416e-80	1.73208e-78	Significant
X15612.5	LIN7B	LIN7B	0.0539802	0.00258381	5.16678e-82	7.12103e-80	3.63173e-78	Significant
X4707.50	14-3-3 eta	YWHAH	0.122131	0.00585122	5.37656e-82	7.26766e-80	3.77918e-78	Significant
X21756.5	UBE2N/UBE2V2 Complex	UBE2N|UBE2V2	0.103951	0.00509256	4.5579e-79	6.0448e-77	3.20374e-75	Significant
X12358.6	IGBP1	IGBP1	0.0427064	0.00209378	8.65026e-79	1.12598e-76	6.08027e-75	Significant
X17367.5	Stathmin	STMN1	0.104152	0.00511207	1.03984e-78	1.32891e-76	7.30901e-75	Significant
X8300.82	PEX14:N-term	PEX14	0.0515302	0.00252946	1.19454e-78	1.49936e-76	8.39643e-75	Significant
X19196.73	HOP	HOPX	0.0670044	0.0033246	2.96198e-77	3.65259e-75	2.08197e-73	Significant
X19290.5	HPRT	HPRT1	0.122606	0.00616292	1.07007e-75	1.29681e-73	7.5215e-72	Significant
X3503.4	Integrin a1b1	ITGA1|ITGB1	0.162969	0.00830258	7.45434e-74	8.88078e-72	5.23966e-70	Significant
X19267.14	GLO2	HAGH	0.104123	0.0053168	1.04448e-73	1.22361e-71	7.34166e-70	Significant
X24474.12	TTC9A	TTC9	0.0612387	0.0031237	1.22292e-73	1.40916e-71	8.59588e-70	Significant
X13967.14	Thioredoxin reductase 1	TXNRD1	0.0933958	0.00477375	1.35854e-73	1.54019e-71	9.54921e-70	Significant
X24908.19	AMPH	AMPH	0.102421	0.00525453	4.49609e-73	5.01635e-71	3.1603e-69	Significant
X11214.40	DNJB9	DNAJB9	0.0853809	0.00438908	6.78996e-73	7.45728e-71	4.77266e-69	Significant
X17156.72	DCAK1	DCLK1	0.119264	0.00613209	8.54516e-73	9.24061e-71	6.0064e-69	Significant
X12796.44	NUDT3	NUDT3	0.0532434	0.00273915	1.02616e-72	1.09286e-70	7.21284e-69	Significant
X9169.14	SUMO3	SUMO3	0.0955903	0.00497067	1.78866e-71	1.87649e-69	1.25725e-67	Significant
X9900.36	NFH	NEFH	0.0990308	0.00515297	2.54162e-71	2.62721e-69	1.7865e-67	Significant
X25276.32	RABL6	RABL6	0.0675487	0.00351572	2.88552e-71	2.93947e-69	2.02824e-67	Significant
X3351.1	CAMK2B	CAMK2B	0.0360583	0.00189101	2.76859e-70	2.78006e-68	1.94604e-66	Significant
X12499.108	SH3G2	SH3GL2	0.0591949	0.00313973	4.86231e-69	4.81368e-67	3.41772e-65	Significant
X14623.26	SUMO3	SUMO3	0.0842866	0.00448951	1.34247e-68	1.31059e-66	9.43624e-65	Significant
X25285.14	KBTBB	KBTBD11	0.0391097	0.00209293	9.43431e-68	9.08408e-66	6.63138e-64	Significant
X21351.8	Glycyl t-RNA synthetase	GARS1	0.101902	0.00550073	4.46811e-67	4.2441e-65	3.14063e-63	Significant
X23546.9	HAGHL	HAGHL	0.0459155	0.0024997	5.18638e-66	4.86068e-64	3.64551e-62	Significant
X9816.37	ISOC1	ISOC1	0.0261445	0.00142461	7.82027e-66	7.23272e-64	5.49687e-62	Significant
X9877.28	CRKL	CRKL	0.0781068	0.00426889	1.17913e-65	1.07638e-63	8.28809e-62	Significant
X17721.82	GAS7	GAS7	0.0273857	0.00149678	1.65596e-65	1.49227e-63	1.16397e-61	Significant
X18226.148	COX5A	COX5A	0.055017	0.00300907	2.08041e-65	1.85104e-63	1.46232e-61	Significant
X9126.171	NT5D3	NT5DC3	0.0633547	0.00349723	1.66017e-64	1.45867e-62	1.16693e-60	Significant
X12661.44	GBRL1	GABARAPL1	0.0773752	0.00428885	4.13395e-64	3.58735e-62	2.90575e-60	Significant
X23327.1	BORC5	BORCS5	0.0323733	0.00179924	1.00268e-63	8.59495e-62	7.04786e-60	Significant
X17775.8	TAGL3	TAGLN3	0.107537	0.00598819	1.33855e-63	1.13357e-61	9.40866e-60	Significant
X17757.86	CAB39	CAB39	0.0795591	0.00446626	1.04215e-62	8.72059e-61	7.3253e-59	Significant
X11293.14	LRRN1:CD	LRRN1	0.231639	0.0130818	4.33036e-62	3.58096e-60	3.04381e-58	Significant
X25912.131	FK506 binding protein 1A	FKBP1A	0.113288	0.00639553	4.87941e-62	3.98806e-60	3.42974e-58	Significant
X3872.2	TCTP	TPT1	0.0759662	0.00429726	6.57968e-62	5.31593e-60	4.62486e-58	Significant
X17735.130	GBRAP	GABARAP	0.0723856	0.00409732	7.69147e-62	6.14356e-60	5.40633e-58	Significant
X4272.46	PHI	GPI	0.114198	0.0064947	2.5806e-61	2.0381e-59	1.81391e-57	Significant
X4276.10	prostatic binding protein	PEBP1	0.0681428	0.0038817	4.03168e-61	3.14874e-59	2.83387e-57	Significant
X5476.66	PKC-G	PRKCG	0.0873868	0.00498149	4.35889e-61	3.36688e-59	3.06386e-57	Significant
X9934.29	PIPNA	PITPNA	0.0610432	0.0034808	5.22197e-61	3.9897e-59	3.67053e-57	Significant
X21889.2	CG024	GGCT	0.0475002	0.00273846	8.77646e-60	6.63331e-58	6.16897e-56	Significant
X21747.114	UBE2N/UB2V1 Complex	UBE2N|UBE2V1	0.0864158	0.00501136	2.74056e-59	2.0493e-57	1.92634e-55	Significant
X14066.49	MAGI2	MAGI2	0.0706699	0.00409865	3.23705e-59	2.39508e-57	2.27532e-55	Significant
X21206.218	HAX1	HAX1	0.105274	0.00611933	4.4162e-59	3.23349e-57	3.10415e-55	Significant
X7788.1	CF6	ATP5PF	0.0417156	0.00243129	1.09119e-58	7.90719e-57	7.66997e-55	Significant
X23387.18	TIPRL	TIPRL	0.0952165	0.00555851	1.25297e-58	8.98683e-57	8.80709e-55	Significant
X22782.80	SPC25	SPC25	0.355505	0.0208011	2.05915e-58	1.46199e-56	1.44737e-54	Significant
X13482.14	CNOT1	CNOT1	0.0231053	0.00135491	4.24837e-58	2.98618e-56	2.98618e-54	Significant
X20111.5	BASP	BASP1	0.109407	0.0064229	5.04785e-58	3.51301e-56	3.54814e-54	Significant
X19555.1	SUMO2	SUMO2	0.029195	0.00172967	4.75069e-57	3.27378e-55	3.33926e-53	Significant
X11649.3	SMAP1	SMAP1	0.0231997	0.00137554	5.8782e-57	4.01144e-55	4.13179e-53	Significant
X3405.6	UFC1	UFC1	0.0690694	0.00410027	6.3298e-57	4.2781e-55	4.44922e-53	Significant
X4250.23	NSF1C	NSFL1C	0.0608366	0.00361082	6.74489e-57	4.51522e-55	4.74098e-53	Significant
X21955.36	BAT3	BAG6	0.0684285	0.0040672	8.26305e-57	5.47934e-55	5.8081e-53	Significant
X21154.8	CB39L	CAB39L	0.0828403	0.0049351	1.40453e-56	9.22658e-55	9.87244e-53	Significant
X19243.2	PFD2	PFDN2	0.0253916	0.00151301	1.56649e-56	1.01952e-54	1.10109e-52	Significant
X17791.25	HPCL1	HPCAL1	0.0320854	0.00191372	2.19607e-56	1.41617e-54	1.54362e-52	Significant
X11490.42	UBL4A	UBL4A	0.0591768	0.0035402	3.69805e-56	2.36305e-54	2.59936e-52	Significant
X11626.7	UB2V1	UBE2V1	0.0887711	0.00532379	6.06957e-56	3.84351e-54	4.2663e-52	Significant
X9738.7	FAF2	FAF2	0.0556783	0.00335629	2.01015e-55	1.26155e-53	1.41293e-51	Significant
X24255.38	EPN1	EPN1	0.0381051	0.00230589	5.86734e-55	3.64969e-53	4.12415e-51	Significant
X10085.25	STAR	STAR	0.0860855	0.00524232	1.92441e-54	1.18655e-52	1.35267e-50	Significant
X14070.56	ITSN1	ITSN1	0.0286946	0.00174594	2.09971e-54	1.28338e-52	1.47589e-50	Significant
X11683.19	GGA3	GGA3	0.0208795	0.00127215	2.51998e-54	1.52698e-52	1.7713e-50	Significant
X3766.51	STX1a	STX1A	0.0589655	0.00361627	9.92757e-54	5.96418e-52	6.97809e-50	Significant
X22049.24	14-3-3 eta	YWHAH	0.0942694	0.00580853	2.16843e-53	1.29169e-51	1.52419e-49	Significant
X3636.37	OLR1	OLR1	0.0989458	0.00610771	3.25956e-53	1.92533e-51	2.29114e-49	Significant
X17380.2	UBE2K	UBE2K	0.093005	0.00576017	6.70099e-53	3.9251e-51	4.71012e-49	Significant
X9789.52	Nesprin-2	SYNE2	0.0739553	0.00459817	1.5249e-52	8.85829e-51	1.07185e-48	Significant
X25488.6	PKHO2	PLEKHO2	0.0716467	0.00447111	3.38313e-52	1.94918e-50	2.37801e-48	Significant
X18910.45	LIN7A	LIN7A	0.0358454	0.00225068	1.34276e-51	7.6734e-50	9.43828e-48	Significant
X13475.10	UB2D4	UBE2D4	0.0774831	0.00486707	1.36443e-51	7.73434e-50	9.59058e-48	Significant
X3115.64	MK01	MAPK1	0.0238991	0.00150083	1.45786e-51	8.19786e-50	1.02473e-47	Significant
X19239.5	ARF1	ARF1	0.0580984	0.0036666	3.36732e-51	1.87848e-49	2.36689e-47	Significant
X19194.9	Histidyl-tRNA synthetase-related	DTD1	0.0797641	0.00503354	3.41035e-51	1.88515e-49	2.39714e-47	Significant
X22045.8	SUMO4	SUMO4	0.0183462	0.00115679	3.43291e-51	1.88515e-49	2.41299e-47	Significant
X11633.89	AHSA1	AHSA1	0.0222398	0.00140138	3.48611e-51	1.89953e-49	2.45039e-47	Significant
X10479.18	MMP-10	MMP10	0.0601819	0.00380049	5.08862e-51	2.75138e-49	3.57679e-47	Significant
X20912.10	HDHD1	PUDP	0.0394498	0.00249385	5.17666e-51	2.77761e-49	3.63867e-47	Significant
X3392.68	PKB gamma	AKT3	0.0769175	0.0048683	6.38864e-51	3.40195e-49	4.49057e-47	Significant
X12522.6	RD23B	RAD23B	0.0807934	0.00511527	6.44837e-51	3.40794e-49	4.53256e-47	Significant
X8963.8	Vti1-rp1	VTI1B	0.0596801	0.00377883	7.35057e-51	3.85576e-49	5.16671e-47	Significant
X13256.21	SHAN1	SHANK1	0.0141516	0.00089595	8.22806e-51	4.28408e-49	5.7835e-47	Significant
X18387.7	suppression of tumorigenicity 13	ST13	0.113624	0.00720094	9.00659e-51	4.65495e-49	6.33073e-47	Significant
X8019.73	STMN3	STMN3	0.0559528	0.00355045	1.25552e-50	6.44165e-49	8.82507e-47	Significant
X15321.8	CPLX2	CPLX2	0.0796444	0.00507124	2.0554e-50	1.04691e-48	1.44474e-46	Significant
X19238.12	GLNA	GLUL	0.0914735	0.00583191	2.89844e-50	1.46569e-48	2.03731e-46	Significant
X3397.7	SHP-2	PTPN11	0.121591	0.00777282	4.53876e-50	2.27878e-48	3.1903e-46	Significant
X18284.77	WWC1	WWC1	0.0368889	0.00235607	5.22362e-50	2.60403e-48	3.67169e-46	Significant
X16810.3	RhoGDI	GDI1	0.10296	0.00659072	6.91e-50	3.42045e-48	4.85704e-46	Significant
X7997.118	DOC2B	DOC2B	0.0731719	0.00468953	8.08608e-50	3.97462e-48	5.6837e-46	Significant
X19392.6	DDAH1	DDAH1	0.0764667	0.00490739	1.06359e-49	5.19164e-48	7.47596e-46	Significant
X7893.19	OLR1	OLR1	0.0888821	0.00572896	2.43941e-49	1.18252e-47	1.71466e-45	Significant
X13594.158	GGA1	GGA1	0.0734927	0.00475924	6.39031e-49	3.07654e-47	4.49175e-45	Significant
X13574.50	RND1	RND1	0.0415547	0.0026925	7.6534e-49	3.65957e-47	5.37957e-45	Significant
X13698.28	K319L	KIAA0319L	0.0426736	0.00276752	8.1729e-49	3.88157e-47	5.74473e-45	Significant
X17686.27	TBCB	TBCB	0.0743945	0.00483338	1.16306e-48	5.48666e-47	8.17512e-45	Significant
X14068.29	TECK	CCL25	0.0535348	0.0034784	1.18119e-48	5.53507e-47	8.3026e-45	Significant
X22981.3	HPCL1	HPCAL1	0.0203045	0.00131847	1.24816e-48	5.81016e-47	8.77335e-45	Significant
X12401.3	STALP	STAMBPL1	0.0663729	0.00431419	1.4631e-48	6.76588e-47	1.02841e-44	Significant
X10058.1	RD23A	RAD23A	0.0767024	0.00499917	2.18613e-48	1.00433e-46	1.53663e-44	Significant
X18165.181	UB2V2	UBE2V2	0.0663297	0.00434645	6.66747e-48	3.04322e-46	4.68657e-44	Significant
X8274.64	Syntaxin-7	STX7	0.0685999	0.00449879	7.64597e-48	3.46733e-46	5.37435e-44	Significant
X5864.10	aldolase A	ALDOA	0.0657688	0.00433422	1.89257e-47	8.52747e-46	1.33028e-43	Significant
X21110.5	UBE2Z	UBE2Z	0.0603659	0.00397656	2.03675e-47	9.06662e-46	1.43163e-43	Significant
X13943.38	DPY30	DPY30	0.0482103	0.00317222	2.03802e-47	9.06662e-46	1.43253e-43	Significant
X13732.79	Cardiotrophin-1	CTF1	0.15642	0.0103404	4.30912e-47	1.90496e-45	3.02888e-43	Significant
X22966.20	GBRAP	GABARAP	0.0462543	0.00306521	5.43461e-47	2.38749e-45	3.81998e-43	Significant
X5467.15	HSP 90b	HSP90AB1	0.0721756	0.00478921	7.01864e-47	3.06423e-45	4.93341e-43	Significant
X4976.57	CRK	CRK	0.0560294	0.00372729	1.1445e-46	4.96586e-45	8.04469e-43	Significant
X16803.4	CALB2	CALB2	0.0988432	0.00659542	2.02795e-46	8.74509e-45	1.42545e-42	Significant
X23022.5	RhoGDI	GDI1	0.0804008	0.00538473	4.99348e-46	2.14019e-44	3.50992e-42	Significant
X9719.145	MMP-16	MMP16	0.0428963	0.00288309	7.65928e-46	3.26285e-44	5.38371e-42	Significant
X4696.2	FABP	FABP3	0.015731	0.00105811	1.08252e-45	4.58374e-44	7.60901e-42	Significant
X19175.18	MARCKSL1	MARCKSL1	0.0654466	0.00441393	1.48617e-45	6.25526e-44	1.04463e-41	Significant
X17325.10	KGUA	GUK1	0.0645143	0.00436205	2.49538e-45	1.04405e-43	1.754e-41	Significant
X19523.215	PARK7	PARK7	0.102717	0.00697436	5.07705e-45	2.11163e-43	3.56866e-41	Significant
X8887.21	NUDC:CS	NUDC	0.0343818	0.00234002	8.17577e-45	3.38044e-43	5.74675e-41	Significant
X9826.135	Fragile histidine triad protein	FHIT	0.0489163	0.00333559	1.14681e-44	4.71401e-43	8.06096e-41	Significant
X11608.5	MLP3B	MAP1LC3B	0.0667976	0.00456028	1.32938e-44	5.43267e-43	9.34419e-41	Significant
X10001.7	c-Raf	RAF1	0.027405	0.00187177	1.64295e-44	6.67533e-43	1.15483e-40	Significant
X21916.82	OTUL	OTULIN	0.0350483	0.0023948	1.66861e-44	6.74061e-43	1.17287e-40	Significant
X19273.3	Glutathione reductase	GSR	0.0693962	0.00474686	1.9693e-44	7.90984e-43	1.38422e-40	Significant
X13621.31	AP2A2	AP2A2	0.072137	0.00494066	2.3757e-44	9.48795e-43	1.66988e-40	Significant
X6378.2	CEI	C5orf38	0.183352	0.0126447	8.16866e-44	3.24393e-42	5.74175e-40	Significant
X13615.60	NCK2	NCK2	0.0300689	0.00207951	1.64008e-43	6.47647e-42	1.15281e-39	Significant
X15526.33	GSHB	GSS	0.0669344	0.00465715	4.2449e-43	1.6669e-41	2.98374e-39	Significant
X19176.27	FA49B	CYRIB	0.0736432	0.00518177	2.80439e-42	1.09512e-40	1.97121e-38	Significant
X19277.4	KAT	TSTD1	0.0296579	0.00209063	4.31553e-42	1.6759e-40	3.03338e-38	Significant
X10082.251	NFL	NEFL	0.105897	0.00752248	1.5442e-41	5.96385e-40	1.08542e-37	Significant
X11659.31	EPN4	CLINT1	0.0516182	0.00367504	2.20586e-41	8.47266e-40	1.5505e-37	Significant
X4230.1	IF4G2	EIF4G2	0.0445375	0.00317561	3.0141e-41	1.15142e-39	2.11861e-37	Significant
X19293.6	VP26A	VPS26A	0.0686437	0.00490083	3.28887e-41	1.24959e-39	2.31175e-37	Significant
X2864.2	MEK1	MAP2K1	0.0366145	0.0026215	5.833e-41	2.20431e-39	4.10002e-37	Significant
X7761.125	CHKB	CHKB	0.0580563	0.00416586	9.25566e-41	3.47904e-39	6.50581e-37	Significant
X4254.6	NUDC3	NUDCD3	0.0190884	0.00137	9.851e-41	3.68312e-39	6.92427e-37	Significant
X4959.2	AGR2	AGR2	0.0140144	0.00100895	1.38963e-40	5.16808e-39	9.76768e-37	Significant
X17320.19	ADPPT	AASDHPPT	0.0526825	0.0038007	1.88757e-40	6.98302e-39	1.32677e-36	Significant
X20387.277	CHCH7	CHCHD7	0.0573253	0.00414349	2.51808e-40	9.26678e-39	1.76996e-36	Significant
X20972.37	CPSF5	NUDT21	0.0616186	0.00445982	3.35484e-40	1.22819e-38	2.35812e-36	Significant
X2625.53	HSP 90a	HSP90AA1	0.0762506	0.00552265	3.75495e-40	1.36754e-38	2.63936e-36	Significant
X12667.2	GUAD	GDA	0.126509	0.00917221	5.47112e-40	1.98229e-38	3.84565e-36	Significant
X3896.5	Phosphoglycerate mutase 1	PGAM1	0.0810457	0.00589088	7.20783e-40	2.59814e-38	5.06638e-36	Significant
X24669.12	DNJ5B	DNAJC5B	0.065245	0.00475321	9.60328e-40	3.44395e-38	6.75015e-36	Significant
X19630.2	g-Synuclein	SNCG	0.0682812	0.00497609	9.85824e-40	3.51744e-38	6.92935e-36	Significant
X13113.7	Osteopontin	SPP1	0.0774994	0.0056479	1.03314e-39	3.66764e-38	7.26193e-36	Significant
X11462.8	RBM9	RBFOX2	0.0165217	0.00120617	1.3888e-39	4.90547e-38	9.76188e-36	Significant
X3432.21	EPHA3	EPHA3	0.0261441	0.00191143	1.86247e-39	6.54564e-38	1.30913e-35	Significant
X5980.55	BOLA3	BOLA3	0.0341861	0.00250458	2.45234e-39	8.57586e-38	1.72375e-35	Significant
X20960.47	FUBP1	FUBP1	0.0525447	0.00386906	5.24925e-39	1.82658e-37	3.6897e-35	Significant
X12399.194	CCD50	CCDC50	0.0316799	0.00233369	6.21437e-39	2.15176e-37	4.36808e-35	Significant
X17852.5	PPME1	PPME1	0.0283827	0.00209289	7.70729e-39	2.65561e-37	5.41745e-35	Significant
X14037.18	RANB3	RANBP3	0.0312716	0.00231923	1.82572e-38	6.25998e-37	1.2833e-34	Significant
X12936.38	RLBP1	RLBP1	0.0157968	0.00117445	2.5162e-38	8.58562e-37	1.76864e-34	Significant
X9514.46	K0494:C-term	EFCAB14	0.20221	0.015053	2.92617e-38	9.93627e-37	2.05681e-34	Significant
X8307.47	CK068	C11orf68	0.06344	0.00477314	1.60149e-37	5.41196e-36	1.12569e-33	Significant
X21736.60	HS2ST	HS2ST1	0.0278016	0.00209245	1.70282e-37	5.72687e-36	1.19692e-33	Significant
X18318.98	SH3G3	SH3GL3	0.0282475	0.00213044	2.40278e-37	8.04244e-36	1.68891e-33	Significant
X3853.56	MDHC	MDH1	0.0591075	0.0044702	3.70989e-37	1.23587e-35	2.60768e-33	Significant
X18319.7	ODPX	PDHX	0.0214549	0.00162964	6.921e-37	2.2947e-35	4.86477e-33	Significant
X21328.2	SYT1	SYT1	0.072998	0.00556524	1.1214e-36	3.68907e-35	7.88232e-33	Significant
X20139.57	SH3G2	SH3GL2	0.0385004	0.00293437	1.12315e-36	3.68907e-35	7.8946e-33	Significant
X19601.15	ASB9	ASB9	0.0995427	0.00760396	1.48561e-36	4.85692e-35	1.04424e-32	Significant
X11161.5	SPG20	SPART	0.0153943	0.00117978	2.63043e-36	8.55987e-35	1.84893e-32	Significant
X12880.1	SV2A	SV2A	0.0224901	0.00172888	4.2263e-36	1.36897e-34	2.97067e-32	Significant
X5496.49	Spondin-1	SPON1	0.0516353	0.00397514	4.73752e-36	1.52753e-34	3.33001e-32	Significant
X11243.90	GPR110	ADGRF1	0.0562826	0.00434493	7.15706e-36	2.29712e-34	5.0307e-32	Significant
X3419.49	CAMK2D	CAMK2D	0.018737	0.00144657	7.98949e-36	2.55264e-34	5.61581e-32	Significant
X9997.12	UBXN4:CD 1	UBXN4	0.0456902	0.00353032	8.33694e-36	2.6516e-34	5.86004e-32	Significant
X11438.6	DNJB2	DNAJB2	0.0259891	0.00200783	9.04567e-36	2.86406e-34	6.3582e-32	Significant
X12881.17	RDH16	RDH16	-0.0433098	0.00335714	1.3509e-35	4.25805e-34	9.49545e-32	Significant
X23396.21	TWF2	TWF2	0.0670095	0.00519617	1.38118e-35	4.33408e-34	9.70834e-32	Significant
X17816.58	NCALD	NCALD	0.017491	0.00135866	1.87602e-35	5.86067e-34	1.31865e-31	Significant
X6285.71	K0152	MLEC	0.0482018	0.00375189	2.49073e-35	7.74663e-34	1.75074e-31	Significant
X23320.11	MB12B	MVB12B	0.0575134	0.00448001	2.6745e-35	8.28152e-34	1.8799e-31	Significant
X13960.15	AGAP3	AGAP3	0.0261951	0.00204168	3.2238e-35	9.93864e-34	2.26601e-31	Significant
X11926.23	P34	AAGAB	0.0261143	0.00204077	4.58539e-35	1.40745e-33	3.22307e-31	Significant
X12993.21	NPL4	NPLOC4	0.0220129	0.00172179	5.1143e-35	1.56297e-33	3.59484e-31	Significant
X7898.29	MDM1	MDM1	0.0286701	0.00224928	7.43883e-35	2.26353e-33	5.22875e-31	Significant
X19233.75	ATOX1	ATOX1	0.0607807	0.00476715	7.71083e-35	2.33618e-33	5.41994e-31	Significant
X11279.42	GABR1	GABBR1	0.0329838	0.002592	9.66914e-35	2.91693e-33	6.79644e-31	Significant
X11664.32	ARFG2	ARFGAP2	0.0280697	0.00220568	1.02906e-34	3.09114e-33	7.23326e-31	Significant
X22786.57	SPT46	SPATA46	0.0442456	0.00348889	1.72403e-34	5.15668e-33	1.21182e-30	Significant
X20126.19	GFAP	GFAP	0.0549358	0.00435864	3.88692e-34	1.15768e-32	2.73212e-30	Significant
X3825.18	MK08	MAPK8	0.0188168	0.00149686	5.43826e-34	1.61289e-32	3.82256e-30	Significant
X6400.33	P5I13	TP53I13	0.0564201	0.00449031	5.71492e-34	1.68782e-32	4.01702e-30	Significant
X13044.5	TS101	TSG101	0.0477326	0.00380326	6.76129e-34	1.9885e-32	4.75251e-30	Significant
X25413.80	GAGE-2	GAGE2B	0.0280661	0.00224947	1.667e-33	4.88223e-32	1.17174e-29	Significant
X8353.15	SCN2B	SCN2B	0.0642461	0.00516138	2.06443e-33	6.02112e-32	1.45109e-29	Significant
X12800.5	TPPP2	TPPP2	0.0726748	0.00585238	2.84336e-33	8.25866e-32	1.9986e-29	Significant
X3034.1	GFAP	GFAP	0.0777188	0.0062647	3.24994e-33	9.40075e-32	2.28438e-29	Significant
X20942.4	DNJB8	DNAJB8	0.0605336	0.00489358	4.89224e-33	1.40932e-31	3.43875e-29	Significant
X8975.26	RCD1	CNOT9	0.0294707	0.00238308	5.26144e-33	1.5095e-31	3.69826e-29	Significant
X15627.83	PKB	AKT1	0.052178	0.00422758	6.49487e-33	1.85579e-31	4.56524e-29	Significant
X12720.71	UBQL4	UBQLN4	0.0539904	0.00437632	7.10706e-33	2.02249e-31	4.99555e-29	Significant
X21935.16	UBE2H	UBE2H	0.0110351	0.000895143	8.83933e-33	2.50531e-31	6.21316e-29	Significant
X21429.50	THOP1	THOP1	0.238548	0.0193766	9.02837e-33	2.54861e-31	6.34604e-29	Significant
X7758.217	RN215:ECD	RNF215	0.0127333	0.00103605	1.22076e-32	3.43228e-31	8.5807e-29	Significant
X8409.3	RSPO2	RSPO2	0.0560415	0.00456325	1.27292e-32	3.56468e-31	8.94735e-29	Significant
X3481.87	XPNPEP1	XPNPEP1	0.0632711	0.00515443	1.37415e-32	3.83291e-31	9.65893e-29	Significant
X5909.51	Nucleoside diphosphate kinase A	NME1	0.0420352	0.00342485	1.40746e-32	3.91028e-31	9.89301e-29	Significant
X23703.8	PDLI5	PDLIM5	0.0988188	0.00807876	2.15581e-32	5.96582e-31	1.51532e-28	Significant
X9883.29	Glyoxalase I	GLO1	0.103792	0.00849053	2.6263e-32	7.23932e-31	1.84603e-28	Significant
X23345.2	NECA1	NECAB1	0.0252196	0.00207175	4.3177e-32	1.18551e-30	3.03491e-28	Significant
X9831.12	G3BP2	G3BP2	0.0432734	0.00356266	5.87269e-32	1.60619e-30	4.12792e-28	Significant
X5947.90	Tpo	THPO	0.0482413	0.00398533	8.66978e-32	2.36201e-30	6.09399e-28	Significant
X18332.17	CPLX1	CPLX1	0.0772507	0.00638346	9.08938e-32	2.46677e-30	6.38893e-28	Significant
X25424.234	SYT12	SYT12	0.0101418	0.000838921	1.12985e-31	3.0545e-30	7.94169e-28	Significant
X3836.51	UFM1	UFM1	0.0173352	0.00143482	1.18627e-31	3.19474e-30	8.33828e-28	Significant
X17814.8	BPNT1	BPNT1	0.0630343	0.00523924	1.96014e-31	5.2587e-30	1.37778e-27	Significant
X18218.48	CB032	CNRIP1	0.0992443	0.00820532	2.21386e-31	5.91682e-30	1.55612e-27	Significant
X7745.3	ZCD1	CISD1	0.0509716	0.00424233	2.25006e-31	5.99079e-30	1.58157e-27	Significant
X12432.23	CYBP	CACYBP	0.0409565	0.00342698	4.6123e-31	1.22339e-29	3.24198e-27	Significant
X25060.18	MAOX	ME1	0.0665582	0.00557093	4.78555e-31	1.26457e-29	3.36376e-27	Significant
X10903.50	STX8	STX8	0.0680006	0.00570536	6.4292e-31	1.69254e-29	4.51908e-27	Significant
X3152.57	TNF sR-II	TNFRSF1B	0.0570958	0.00483143	1.86205e-30	4.88371e-29	1.30883e-26	Significant
X19121.3	UBQL2	UBQLN2	0.0584712	0.00497786	3.96818e-30	1.03689e-28	2.78923e-26	Significant
X22989.24	LIN7A	LIN7A	0.0194902	0.00166177	5.0909e-30	1.32533e-28	3.5784e-26	Significant
X21600.10	CNBP1	CTNNBIP1	0.0443591	0.00379869	8.17544e-30	2.12049e-28	5.74652e-26	Significant
X22381.1	LACB2	LACTB2	0.053472	0.00458783	1.02254e-29	2.64244e-28	7.18744e-26	Significant
X19768.13	Cystatin B	CSTB	0.0393466	0.00340569	3.03998e-29	7.82711e-28	2.1368e-25	Significant
X25233.2	MPI	MPI	0.034804	0.00301178	3.82022e-29	9.80012e-28	2.68523e-25	Significant
X12469.19	MARE1	MAPRE1	0.0664614	0.00578045	5.28132e-29	1.34991e-27	3.71224e-25	Significant
X24475.45	SNX12	SNX12	0.0714007	0.00621754	6.13286e-29	1.56188e-27	4.31079e-25	Significant
X15635.4	SMOC2	SMOC2	0.070245	0.00614129	9.97613e-29	2.53149e-27	7.01222e-25	Significant
X8368.102	TNF sR-II	TNFRSF1B	0.053415	0.00468285	1.3497e-28	3.4126e-27	9.48704e-25	Significant
X4194.26	AN32B	ANP32B	0.060193	0.00529141	1.84959e-28	4.65978e-27	1.30008e-24	Significant
X20923.10	MGDP1	MDP1	0.0703055	0.00619223	2.3818e-28	5.97917e-27	1.67417e-24	Significant
X13963.7	tollip	TOLLIP	0.0410681	0.00361855	2.47293e-28	6.18584e-27	1.73822e-24	Significant
X3600.2	Chitotriosidase-1	CHIT1	0.219186	0.0193813	4.20208e-28	1.04739e-26	2.95365e-24	Significant
X7038.45	SIA8D	ST8SIA4	0.0403938	0.00359124	6.97196e-28	1.73166e-26	4.90059e-24	Significant
X19383.131	CINP	CINP	0.0212936	0.00189128	7.45738e-28	1.8457e-26	5.24179e-24	Significant
X20444.12	TPPP3	TPPP3	0.0847466	0.00755865	9.97414e-28	2.45994e-26	7.01083e-24	Significant
X25292.4	EST3	CES3	0.0438435	0.00391823	1.25699e-27	3.08929e-26	8.83538e-24	Significant
X20948.16	NUD16	NUDT16	0.0864974	0.00773065	1.27688e-27	3.12725e-26	8.9752e-24	Significant
X13384.110	FUMH	FH	0.137491	0.0122897	1.3095e-27	3.196e-26	9.20447e-24	Significant
X12460.18	PSA7	PSMA7	0.119792	0.0107564	2.11038e-27	5.13282e-26	1.48339e-23	Significant
X12479.50	KAP1	PRKAR1B	0.0385419	0.00346241	2.29418e-27	5.56063e-26	1.61258e-23	Significant
X20183.48	MEOX1	MEOX1	0.0126358	0.00113805	3.00866e-27	7.2673e-26	2.11479e-23	Significant
X15524.30	PGAM2	PGAM2	0.0560784	0.0050516	3.12611e-27	7.52516e-26	2.19735e-23	Significant
X11636.33	Transgelin-2	TAGLN2	0.0218326	0.0019675	3.2433e-27	7.78061e-26	2.27972e-23	Significant
X16583.8	AP4A	NUDT2	0.0457886	0.00412777	3.35314e-27	8.01674e-26	2.35692e-23	Significant
X21157.6	HYKK	HYKK	-0.0240568	0.00217384	4.51262e-27	1.07523e-25	3.17192e-23	Significant
X9171.11	CSRP3	CSRP3	0.0727839	0.00659038	5.45193e-27	1.29465e-25	3.83216e-23	Significant
X8479.4	MMP-10	MMP10	0.020657	0.00187046	5.57652e-27	1.31978e-25	3.91974e-23	Significant
X22055.31	FOXO1A	FOXO1	-0.0811721	0.00736274	6.56267e-27	1.54795e-25	4.6129e-23	Significant
X25232.4	EHD3	EHD3	0.054972	0.00499126	7.35045e-27	1.72797e-25	5.16663e-23	Significant
X14326.4	UB2E1	UBE2E1	0.0346842	0.00315187	8.21845e-27	1.92558e-25	5.77675e-23	Significant
X6991.24	FUT9	FUT9	0.059702	0.00542987	1.05009e-26	2.45218e-25	7.38106e-23	Significant
X19623.26	40S ribosomal protein SA	RPSA	0.156638	0.0142726	1.07968e-26	2.51295e-25	7.5891e-23	Significant
X24447.26	F221A	FAM221A	0.0146703	0.00133829	1.27749e-26	2.96353e-25	8.9795e-23	Significant
X20915.68	NECP2	NECAP2	0.0402379	0.00367174	1.29854e-26	3.00244e-25	9.12742e-23	Significant
X22141.59	F261	PFKFB1	-0.0273768	0.00250932	2.0943e-26	4.82651e-25	1.47209e-22	Significant
X10870.32	Spastin:MIT	SPAST	0.0344011	0.00315406	2.12768e-26	4.88741e-25	1.49555e-22	Significant
X6502.50	CRIM1:ECD	CRIM1	0.0338115	0.00310989	2.99508e-26	6.85747e-25	2.10524e-22	Significant
X15368.3	BMPER	BMPER	0.0462802	0.00426033	3.28943e-26	7.50694e-25	2.31214e-22	Significant
X12462.20	SETMR	SETMAR	0.185256	0.0171067	4.55589e-26	1.03635e-24	3.20233e-22	Significant
X12812.25	ACYP2	ACYP2	0.0418888	0.00388084	6.52811e-26	1.4802e-24	4.58861e-22	Significant
X20950.159	PRDC1	PRTFDC1	0.0185125	0.00171387	6.55654e-26	1.48186e-24	4.60859e-22	Significant
X14042.11	SARP-2	SFRP1	0.0652493	0.00606044	8.62493e-26	1.9431e-24	6.06246e-22	Significant
X15492.1	CRIM1:ECD	CRIM1	0.0134126	0.0012474	9.82896e-26	2.20728e-24	6.90878e-22	Significant
X11656.110	EVL	EVL	0.0177611	0.0016626	1.96959e-25	4.40899e-24	1.38442e-21	Significant
X7223.60	S100A13	S100A13	-0.183978	0.0172623	2.45523e-25	5.47867e-24	1.72578e-21	Significant
X25479.8	LRRF2	LRRFIP2	0.0369074	0.0034865	5.06246e-25	1.12608e-23	3.5584e-21	Significant
X22068.5	2A5D	PPP2R5D	0.0175377	0.00166061	6.69263e-25	1.48399e-23	4.70425e-21	Significant
X8946.38	NR1H4	NR1H4	0.0174334	0.00165318	7.40902e-25	1.63767e-23	5.2078e-21	Significant
X25085.37	ASPC1	ASPSCR1	0.0121187	0.00115024	8.23898e-25	1.81542e-23	5.79118e-21	Significant
X9808.41	TNR6B	TNRC6B	0.0154447	0.00147014	1.13793e-24	2.49953e-23	7.9985e-21	Significant
X3216.2	PIGR	PIGR	0.183652	0.0174887	1.16076e-24	2.54175e-23	8.15901e-21	Significant
X2647.66	Rab GDP dissociation inhibitor beta	GDI2	0.0448959	0.00428525	1.43266e-24	3.12738e-23	1.00702e-20	Significant
X6641.60	PolyUbiquitin K48	UBB	0.0567719	0.00543963	2.10707e-24	4.58532e-23	1.48106e-20	Significant
X15634.139	SLIT1	SLIT1	0.0442386	0.0042627	3.68057e-24	7.98478e-23	2.58707e-20	Significant
X12501.10	TBCA	TBCA	-0.121946	0.0117294	4.11812e-24	8.90654e-23	2.89463e-20	Significant
X22086.2	BRM1L	BRMS1L	-0.40964	0.0396691	5.99828e-24	1.29331e-22	4.21619e-20	Significant
X24493.10	MTMR7	MTMR7	-0.042405	0.00411309	7.11463e-24	1.52932e-22	5.00087e-20	Significant
X21483.155	KAP0	PRKAR1A	0.037383	0.00363229	8.58836e-24	1.84048e-22	6.03676e-20	Significant
X11493.169	DYL2	DYNLL2	0.040963	0.00399136	1.10529e-23	2.36143e-22	7.7691e-20	Significant
X4280.47	PSA2	PSMA2	0.0379545	0.00369983	1.18594e-23	2.52606e-22	8.336e-20	Significant
X17746.77	FIS1	FIS1	0.0278517	0.00271767	1.29672e-23	2.75367e-22	9.11466e-20	Significant
X14273.19	PPCE	PREP	0.119873	0.0117138	1.48924e-23	3.15298e-22	1.04679e-19	Significant
X3844.2	Cyclophilin A	PPIA	0.0425735	0.00416194	1.52896e-23	3.22734e-22	1.0747e-19	Significant
X4474.19	Ubiquitin	RPS27A	0.0134197	0.00131406	1.78609e-23	3.75882e-22	1.25545e-19	Significant
X23923.26	PPM1F	PPM1F	0.0550551	0.0053914	1.79801e-23	3.77261e-22	1.26382e-19	Significant
X21707.15	C1QL3	C1QL3	0.0691098	0.00678064	2.15517e-23	4.50853e-22	1.51487e-19	Significant
X25108.6	ATE1	ATE1	-0.0451922	0.00444814	2.91212e-23	6.07397e-22	2.04693e-19	Significant
X11211.7	TBCE	TBCE	0.0197344	0.00194188	2.96238e-23	6.16052e-22	2.08226e-19	Significant
X23284.5	LMO4	LMO4	-0.0552081	0.0054361	3.03455e-23	6.292e-22	2.13299e-19	Significant
X17818.22	SUGT1	SUGT1	0.0468194	0.00461052	3.0728e-23	6.35257e-22	2.15987e-19	Significant
X22540.129	PSB7	PSMB7	0.0328696	0.00323965	3.39168e-23	6.99125e-22	2.38401e-19	Significant
X16825.20	ATX3	ATXN3	0.0226839	0.00223706	3.58651e-23	7.37122e-22	2.52096e-19	Significant
X7738.299	STX2	STX2	0.0560984	0.00554872	4.70887e-23	9.62639e-22	3.30987e-19	Significant
X16606.85	Aldose reductase	AKR1B1	0.0399561	0.00395257	4.71116e-23	9.62639e-22	3.31148e-19	Significant
X21276.11	CD133	PROM1	0.0979671	0.00968819	4.93613e-23	1.00568e-21	3.46961e-19	Significant
X11320.29	CHFR	CHFR	0.0155019	0.00154989	1.27798e-22	2.59622e-21	8.98292e-19	Significant
X24938.7	AP2B1	AP2B1	0.0418296	0.00419728	1.7786e-22	3.60282e-21	1.25018e-18	Significant
X18380.78	Albumin	ALB	-0.0506803	0.00508767	1.90101e-22	3.83972e-21	1.33622e-18	Significant
X12494.99	GBRL2	GABARAPL2	0.0404376	0.00406817	2.26704e-22	4.56591e-21	1.5935e-18	Significant
X10530.8	PSB6	PSMB6	0.00971288	0.000977703	2.41282e-22	4.84563e-21	1.69597e-18	Significant
X24426.191	CTNA1	CTNNA1	0.0162342	0.00163493	2.57663e-22	5.15987e-21	1.81112e-18	Significant
X13642.90	CIG49	IFIT3	-0.0200171	0.00202182	3.28326e-22	6.55627e-21	2.30781e-18	Significant
X24954.83	AP1B1	AP1B1	0.018699	0.00189025	3.56549e-22	7.09967e-21	2.50618e-18	Significant
X5885.55	eIF-4H	EIF4H	0.0399965	0.00404999	4.16082e-22	8.26169e-21	2.92464e-18	Significant
X17490.4	SH3BGRL3-like protein	SH3BGRL3	0.0144298	0.001461	4.18962e-22	8.29545e-21	2.94489e-18	Significant
X4851.25	IL-1a	IL1A	0.0332393	0.00337287	4.98226e-22	9.83717e-21	3.50203e-18	Significant
X8053.16	DJB14:CD	DNAJB14	0.0184484	0.00187419	5.64299e-22	1.11105e-20	3.96645e-18	Significant
X13563.259	ACBD7	ACBD7	0.0132325	0.00134963	7.9899e-22	1.56874e-20	5.6161e-18	Significant
X20231.23	UPP2	UPP2	0.0193318	0.00197354	8.72118e-22	1.70755e-20	6.13012e-18	Significant
X8458.16	a-Synuclein	SNCA	0.0180357	0.00184135	8.91256e-22	1.74018e-20	6.26464e-18	Significant
X10557.6	TEX29	TEX29	0.0640143	0.00654598	9.93219e-22	1.93389e-20	6.98134e-18	Significant
X9176.3	MUC1:region 2	MUC1	0.0460122	0.00471491	1.19654e-21	2.32334e-20	8.41048e-18	Significant
X13545.97	EIF1A	EIF1AD	0.0103343	0.00106125	1.47009e-21	2.84663e-20	1.03333e-17	Significant
X7144.234	KAZD1	KAZALD1	0.0489987	0.0050332	1.50706e-21	2.91019e-20	1.05931e-17	Significant
X20090.63	UB2E3	UBE2E3	0.0189005	0.00194373	1.67447e-21	3.22461e-20	1.17698e-17	Significant
X16621.77	AIBP	NAXE	0.0420413	0.00434012	2.313e-21	4.4421e-20	1.62581e-17	Significant
X7952.2	VTI1A	VTI1A	0.0498003	0.00514389	2.40095e-21	4.59844e-20	1.68763e-17	Significant
X5475.10	PKC-B-II	PRKCB	0.0368898	0.00385002	5.85845e-21	1.119e-19	4.1179e-17	Significant
X18313.4	Asparaginase-like protein 1	ASRGL1	0.0128059	0.00133615	5.9601e-21	1.13533e-19	4.18935e-17	Significant
X23649.6	KLHL2	KLHL2	0.0336292	0.0035114	6.12284e-21	1.16317e-19	4.30374e-17	Significant
X18236.3	LEGL	LGALSL	0.0136831	0.00143161	7.45738e-21	1.41288e-19	5.24179e-17	Significant
X16317.20	Desmoglein-3	DSG3	0.0276784	0.00290046	9.21989e-21	1.74211e-19	6.48066e-17	Significant
X4203.50	Cofilin-1	CFL1	0.0390065	0.00409459	9.63605e-21	1.81586e-19	6.77318e-17	Significant
X23371.5	NIF3L	NIF3L1	0.105981	0.0111362	1.05508e-20	1.98293e-19	7.41616e-17	Significant
X2668.70	Calpain I	CAPN1|CAPNS1	0.05035	0.00529972	1.21817e-20	2.28333e-19	8.56248e-17	Significant
X7796.10	CD79A	CD79A	0.0411291	0.00434324	1.69162e-20	3.16233e-19	1.18904e-16	Significant
X13013.41	PRKN2	PRKN	0.00919574	0.000971094	1.71117e-20	3.1904e-19	1.20278e-16	Significant
X18901.26	HS71B	HSPA1B	0.0564848	0.00597089	1.73185e-20	3.22042e-19	1.21732e-16	Significant
X22074.35	Ataxin-2-binding protein 1	RBFOX1	0.00659856	0.000697498	1.76577e-20	3.27483e-19	1.24116e-16	Significant
X17355.56	SYT4	SYT4	0.0433796	0.00459777	2.16881e-20	4.01173e-19	1.52446e-16	Significant
X7186.111	STX3	STX3	0.0440772	0.00467169	2.19689e-20	4.053e-19	1.54419e-16	Significant
X19252.67	PSB2	PSMB2	0.0224283	0.00238335	2.75607e-20	5.07131e-19	1.93724e-16	Significant
X18342.2	SERC	PSAT1	0.0511285	0.00543965	3.01486e-20	5.53302e-19	2.11914e-16	Significant
X21967.20	DHI1	HSD11B1	0.0211256	0.0022457	3.10836e-20	5.68975e-19	2.18486e-16	Significant
X21849.2	UBQL3	UBQLN3	0.038132	0.00406013	3.25079e-20	5.93501e-19	2.28498e-16	Significant
X19219.71	NTF-2	NUTF2	0.0355241	0.00378761	3.55547e-20	6.47446e-19	2.49914e-16	Significant
X18280.29	DTD2	DTD2	0.0293095	0.00312575	3.63608e-20	6.60413e-19	2.5558e-16	Significant
X7167.102	VAPA	VAPA	0.0429308	0.0045813	3.79308e-20	6.87154e-19	2.66616e-16	Significant
X5494.52	RUXF	SNRPF	-0.041322	0.00443107	5.70898e-20	1.03158e-18	4.01284e-16	Significant
X23315.30	FAM9B	FAM9B	0.0267443	0.0028723	7.16938e-20	1.29214e-18	5.03936e-16	Significant
X20975.2	RCAN2	RCAN2	0.0223117	0.00240285	8.25505e-20	1.48401e-18	5.80247e-16	Significant
X6603.18	KALM	ANOS1	0.00672101	0.000724991	9.34609e-20	1.67586e-18	6.56936e-16	Significant
X10447.18	PABP3	PABPC3	0.0139512	0.00150505	9.66068e-20	1.72786e-18	6.79049e-16	Significant
X24319.19	ISPD	CRPPA	0.00857255	0.000925803	1.01764e-19	1.81549e-18	7.15302e-16	Significant
X10339.48	NSE	ENO2	0.0532564	0.00576462	1.21745e-19	2.16644e-18	8.55745e-16	Significant
X22009.1	PPM1B	PPM1B	0.0398878	0.00434499	2.02222e-19	3.58944e-18	1.42142e-15	Significant
X11365.17	TEN4	TENM4	0.016727	0.00182475	2.26831e-19	4.01611e-18	1.59439e-15	Significant
X21002.1	NUDC2	NUDCD2	0.0231014	0.00252231	2.47702e-19	4.37462e-18	1.7411e-15	Significant
X19197.95	THIL	ACAT1	0.052127	0.00570055	2.74023e-19	4.82733e-18	1.92611e-15	Significant
X2652.15	suPAR	PLAUR	0.0495988	0.00543497	3.22934e-19	5.67475e-18	2.2699e-15	Significant
X12564.9	NIP7	NIP7	-0.00936971	0.00102894	3.83287e-19	6.71852e-18	2.69413e-15	Significant
X20434.23	PC4L1	PCP4L1	0.0238142	0.0026239	4.95772e-19	8.66861e-18	3.48478e-15	Significant
X18339.207	PSB3	PSMB3	0.015605	0.00172047	5.21686e-19	9.09909e-18	3.66693e-15	Significant
X7625.27	14-3-3 protein theta	YWHAQ	0.055569	0.00614091	6.19819e-19	1.07839e-17	4.35671e-15	Significant
X3350.53	CAMK2A	CAMK2A	0.0077748	0.000860511	7.02144e-19	1.21804e-17	4.93537e-15	Significant
X23187.9	VCIP1	VCPIP1	0.00944474	0.0010454	7.04305e-19	1.21804e-17	4.95056e-15	Significant
X22088.3	BTG1	BTG1	0.0382447	0.00423365	7.06522e-19	1.21804e-17	4.96614e-15	Significant
X11494.4	ELL2	ELL2	-0.0178124	0.00197145	7.07016e-19	1.21804e-17	4.96962e-15	Significant
X9870.17	SYWC	WARS1	0.0597737	0.00662669	7.92577e-19	1.36211e-17	5.57103e-15	Significant
X13589.10	APBB3:PID 2	APBB3	0.0719674	0.00797145	8.35724e-19	1.43276e-17	5.8743e-15	Significant
X19553.14	STX1a	STX1A	0.0654614	0.00726974	9.04297e-19	1.54655e-17	6.35631e-15	Significant
X11130.158	CACB4	CACNB4	0.0122813	0.00136642	1.04838e-18	1.78861e-17	7.36908e-15	Significant
X18235.16	PGP	PGP	0.0256746	0.00285564	1.05273e-18	1.78885e-17	7.39962e-15	Significant
X8040.9	LEMD1	LEMD1	0.0214856	0.00238947	1.05361e-18	1.78885e-17	7.40585e-15	Significant
X9834.62	ADH1B	ADH1B	0.0108332	0.0012064	1.12313e-18	1.90229e-17	7.8945e-15	Significant
X17799.9	6PGL	PGLS	0.0429992	0.0047912	1.1782e-18	1.99076e-17	8.28157e-15	Significant
X4306.4	Transketolase	TKT	0.0242747	0.00270522	1.18148e-18	1.99151e-17	8.30459e-15	Significant
X15604.18	JNK2	MAPK9	0.0139069	0.00155036	1.2253e-18	2.06043e-17	8.61261e-15	Significant
X21341.19	CHM4A	CHMP4A	0.0638688	0.00712771	1.31347e-18	2.20343e-17	9.23235e-15	Significant
X3336.50	TFPI	TFPI	0.0621455	0.00693674	1.33463e-18	2.23359e-17	9.38109e-15	Significant
X9266.1	sTREM-1	TREM1	0.0346708	0.00389225	2.11195e-18	3.5261e-17	1.48449e-14	Significant
X11546.7	CYGB	CYGB	0.00913977	0.00102776	2.34203e-18	3.90097e-17	1.64621e-14	Significant
X18397.5	AK1C4	AKR1C4	-0.0183496	0.00206573	2.53366e-18	4.21019e-17	1.78091e-14	Significant
X12646.2	RPE	RPE	0.0169565	0.00191515	3.23207e-18	5.35807e-17	2.27182e-14	Significant
X15316.262	TXN4B	TXNL4B	0.0141156	0.00159647	3.62303e-18	5.99207e-17	2.54663e-14	Significant
X11160.56	RN122	RNF122	0.0241963	0.00274074	4.00505e-18	6.60833e-17	2.81515e-14	Significant
X12677.164	FLII	FLII	0.012252	0.00138739	4.05153e-18	6.66937e-17	2.84782e-14	Significant
X10948.14	PLD3	PLD3	0.0676521	0.00766697	4.18331e-18	6.8702e-17	2.94045e-14	Significant
X9388.18	MCEE	MCEE	0.0191774	0.00217483	4.43638e-18	7.26884e-17	3.11833e-14	Significant
X11241.8	ARLY	ASL	0.0868958	0.00985653	4.45388e-18	7.28054e-17	3.13063e-14	Significant
X12476.50	TIGAR	TIGAR	0.00879828	0.000998702	4.66991e-18	7.61596e-17	3.28248e-14	Significant
X6404.20	C1QRF	C1QL1	0.0437353	0.00496614	4.80543e-18	7.81883e-17	3.37773e-14	Significant
X3170.6	AMPM2	METAP2	0.0519986	0.00590863	5.03946e-18	8.18069e-17	3.54224e-14	Significant
X24237.115	CACB3	CACNB3	0.0206666	0.00234847	5.1675e-18	8.36921e-17	3.63224e-14	Significant
X25463.3	KAP3	PRKAR2B	0.0366403	0.00417289	6.01327e-18	9.71661e-17	4.22673e-14	Significant
X25064.34	INP4A	INPP4A	0.012213	0.00139141	6.15082e-18	9.91608e-17	4.32341e-14	Significant
X18392.19	MAT2B	MAT2B	0.0429279	0.00489166	6.83082e-18	1.09872e-16	4.80138e-14	Significant
X21536.65	CPLX3	CPLX3	0.0233247	0.00266218	7.00679e-18	1.12445e-16	4.92507e-14	Significant
X18233.10	GOT2	GOT2	0.0521071	0.00596798	9.12468e-18	1.46099e-16	6.41374e-14	Significant
X10835.25	A4GCT	A4GNT	0.0668877	0.00766869	9.64387e-18	1.54061e-16	6.77867e-14	Significant
X5717.2	CILP	CILP	0.0201033	0.00230798	1.07146e-17	1.70778e-16	7.53131e-14	Significant
X14099.20	PSA4	PSMA4	0.00950073	0.00109223	1.18949e-17	1.89161e-16	8.36091e-14	Significant
X9757.29	ENAH	ENAH	0.0166591	0.00191714	1.29491e-17	2.05462e-16	9.10194e-14	Significant
X21752.10	MIRO1	RHOT1	0.0107281	0.0012354	1.3391e-17	2.11993e-16	9.4125e-14	Significant
X2877.3	UBC9	UBE2I	0.0355446	0.00410096	1.52039e-17	2.40154e-16	1.06868e-13	Significant
X5596.75	CD5:ECD	CD5	0.0620844	0.00716894	1.61842e-17	2.55064e-16	1.13759e-13	Significant
X13491.40	PDE6D	PDE6D	0.00995925	0.00115071	1.70462e-17	2.68049e-16	1.19818e-13	Significant
X24435.1	Dynamin	DNM1	0.0515522	0.00596805	1.92935e-17	3.0271e-16	1.35614e-13	Significant
X9872.23	CTNA2	CTNNA2	0.0083062	0.000964581	2.4314e-17	3.8063e-16	1.70903e-13	Significant
X7089.42	SYT11	SYT11	0.0123869	0.00144201	2.88851e-17	4.51185e-16	2.03033e-13	Significant
X9754.33	Quinone reductase 2	NQO2	0.0454166	0.00529366	3.30347e-17	5.14857e-16	2.32201e-13	Significant
X21537.33	SCLY	SCLY	0.0302327	0.00353141	3.64461e-17	5.66769e-16	2.56179e-13	Significant
X8006.12	DJB12	DNAJB12	0.0405311	0.00473984	3.92045e-17	6.08318e-16	2.75568e-13	Significant
X3642.4	SLAF5	CD84	0.0292248	0.00341945	4.13629e-17	6.40396e-16	2.9074e-13	Significant
X17678.28	VSIG4	VSIG4	0.0567457	0.00664395	4.328e-17	6.68605e-16	3.04215e-13	Significant
X3855.56	Peroxiredoxin-1	PRDX1	0.04522	0.00530344	4.8068e-17	7.40943e-16	3.3787e-13	Significant
X21180.16	PLCX3	PLCXD3	0.0641487	0.0075361	5.41125e-17	8.3229e-16	3.80357e-13	Significant
X21475.137	TXNL1	TXNL1	0.0786137	0.0092457	6.26486e-17	9.61478e-16	4.40357e-13	Significant
X21499.17	COQ7	COQ7	-0.00785908	0.000925614	6.44059e-17	9.86294e-16	4.52709e-13	Significant
X25297.11	SPD2B	SH3PXD2B	0.0170825	0.00201318	6.75696e-17	1.03249e-15	4.74947e-13	Significant
X21326.28	TBCC	TBCC	0.0260855	0.0030792	7.64508e-17	1.16567e-15	5.37373e-13	Significant
X23654.6	ALG2	ALG2	-0.0414975	0.00490439	8.17255e-17	1.2434e-15	5.74449e-13	Significant
X4212.5	EP15R	EPS15L1	0.00753935	0.000891695	8.65085e-17	1.31332e-15	6.08068e-13	Significant
X18310.26	SELW	SELENOW	0.0399652	0.00473989	1.03536e-16	1.56843e-15	7.27751e-13	Significant
X23425.19	ERMIN	ERMN	0.0535076	0.00634339	1.04376e-16	1.57776e-15	7.33657e-13	Significant
X19438.68	SYF2	SYF2	0.028833	0.00342071	1.07784e-16	1.62578e-15	7.57616e-13	Significant
X24902.84	GEPH	GPHN	0.0505365	0.00603011	1.56095e-16	2.34945e-15	1.0972e-12	Significant
X22579.93	NRX1B	NRXN1	0.0806404	0.00963148	1.66845e-16	2.50589e-15	1.17275e-12	Significant
X13939.14	UGPA1	UGP2	0.0276809	0.00331174	1.85939e-16	2.78671e-15	1.30697e-12	Significant
X7999.23	CD39	ENTPD1	0.0493707	0.0059093	1.90978e-16	2.85613e-15	1.34238e-12	Significant
X23929.159	PRRT2	PRRT2	0.0496736	0.00595624	2.16962e-16	3.23784e-15	1.52502e-12	Significant
X3441.64	GSK-3 alpha	GSK3A	0.0115648	0.00138954	2.47075e-16	3.67943e-15	1.73669e-12	Significant
X13676.46	Inhibin bB chain	INHBB	0.0411013	0.0049414	2.56375e-16	3.80986e-15	1.80206e-12	Significant
X22103.25	CDK20	CDK20	0.0329112	0.00394725	2.58593e-16	3.83471e-15	1.81765e-12	Significant
X12446.49	GST A1-1	GSTA1	0.0118799	0.00143221	3.10978e-16	4.60183e-15	2.18587e-12	Significant
X23409.83	SYAP1	SYAP1	0.0110016	0.00132671	3.14966e-16	4.65104e-15	2.21389e-12	Significant
X11258.41	MAdCAM-1	MADCAM1	0.0151466	0.00182739	3.25968e-16	4.80341e-15	2.29123e-12	Significant
X20457.13	COA4	COA4	0.0195891	0.00236668	3.60439e-16	5.30026e-15	2.53353e-12	Significant
X17827.53	DLRB2	DYNLRB2	0.011276	0.0013628	3.723e-16	5.46325e-15	2.6169e-12	Significant
X7818.101	GBP6	GBP6	0.0123864	0.00149926	4.05203e-16	5.9337e-15	2.84817e-12	Significant
X20107.11	MYL4	MYL4	0.0293653	0.00355575	4.09065e-16	5.9778e-15	2.87532e-12	Significant
X9503.1	NMS	NMS	0.0157016	0.00190357	4.46168e-16	6.50647e-15	3.13612e-12	Significant
X8048.9	FTMT	FTMT	0.0565463	0.00685249	4.48447e-16	6.52616e-15	3.15214e-12	Significant
X13434.172	PARVA	PARVA	0.0445802	0.00541131	4.88254e-16	7.09077e-15	3.43193e-12	Significant
X23365.7	FNDC8	FNDC8	0.0196088	0.00237796	5.33687e-16	7.73461e-15	3.75129e-12	Significant
X20929.4	CTDSL	CTDSPL	-0.0128798	0.00156778	5.79083e-16	8.37525e-15	4.07037e-12	Significant
X18340.2	Proteasome beta chain	PSMB4	0.0821677	0.0100091	6.05181e-16	8.73474e-15	4.25382e-12	Significant
X17205.21	RAB5A	RAB5A	-0.015723	0.00191647	6.35358e-16	9.1515e-15	4.46593e-12	Significant
X21857.26	RACK1	RACK1	-0.0552854	0.00674575	6.74381e-16	9.69371e-15	4.74022e-12	Significant
X13124.20	ISLR2	ISLR2	0.0582252	0.00710697	6.87525e-16	9.86248e-15	4.83261e-12	Significant
X9942.2	NXT1	NXT1	0.0107124	0.00131065	8.05532e-16	1.15317e-14	5.66209e-12	Significant
X8268.98	HS3SA	HS3ST3A1	0.0135582	0.00165971	8.51496e-16	1.2165e-14	5.98517e-12	Significant
X3897.61	PLPP	PDXP	0.0327011	0.00400811	9.23558e-16	1.31677e-14	6.49169e-12	Significant
X2813.11	ART	AGRP	0.0625152	0.00767175	9.7372e-16	1.38548e-14	6.84428e-12	Significant
X18373.13	Radixin	RDX	0.0395772	0.00485933	1.00092e-15	1.4213e-14	7.03545e-12	Significant
X21539.139	SYT6	SYT6	0.032304	0.00396644	1.00379e-15	1.42251e-14	7.05565e-12	Significant
X12497.29	SDOS	NUDT16L1	0.0231527	0.00284393	1.03702e-15	1.46664e-14	7.28922e-12	Significant
X19257.11	CLCA	CLTA	0.039983	0.004931	1.34565e-15	1.89931e-14	9.45856e-12	Significant
X12988.49	EWS	EWSR1	0.0163753	0.00201984	1.3512e-15	1.90333e-14	9.4976e-12	Significant
X21814.13	MMAD	MMADHC	-0.0141906	0.00175072	1.40119e-15	1.96979e-14	9.84895e-12	Significant
X8528.74	ISLR2	ISLR2	0.0587593	0.00725553	1.43474e-15	2.01294e-14	1.00848e-11	Significant
X5464.52	GRB2 adapter protein	GRB2	0.0410361	0.00507188	1.5237e-15	2.13349e-14	1.07101e-11	Significant
X11401.181	RN146	RNF146	0.00687532	0.000850324	1.61212e-15	2.24949e-14	1.13316e-11	Significant
X17836.17	S100A16	S100A16	0.0268748	0.00332271	1.61295e-15	2.24949e-14	1.13375e-11	Significant
X22527.4	PDLI3	PDLIM3	0.0524875	0.00649093	1.62877e-15	2.26705e-14	1.14486e-11	Significant
X8221.19	MIF	MIF	0.1457	0.0180319	1.65237e-15	2.29536e-14	1.16145e-11	Significant
X16315.105	VEGF sR1	FLT1	0.0200495	0.00248857	2.00903e-15	2.7853e-14	1.41215e-11	Significant
X5682.13	VASN	VASN	0.0268285	0.00333379	2.14319e-15	2.96545e-14	1.50645e-11	Significant
X5020.50	phosphoglycerate kinase 1	PGK1	0.020569	0.00255904	2.32252e-15	3.20726e-14	1.6325e-11	Significant
X21876.266	PICK1	PICK1	-0.017501	0.00217754	2.38237e-15	3.28347e-14	1.67457e-11	Significant
X17411.55	UFD1	UFD1	0.0119592	0.00148999	2.51986e-15	3.46616e-14	1.77121e-11	Significant
X14271.23	RAB6B	RAB6B	0.0285653	0.00356147	2.62431e-15	3.60279e-14	1.84463e-11	Significant
X23285.51	KCTD2	KCTD2	-0.0416156	0.00520081	3.0262e-15	4.14642e-14	2.12711e-11	Significant
X7139.14	SLIK4	SLITRK4	0.0438009	0.00547436	3.05068e-15	4.17184e-14	2.14432e-11	Significant
X19287.59	DENR	DENR	0.0120208	0.00150383	3.24538e-15	4.42947e-14	2.28117e-11	Significant
X13097.11	Apoptosis regulator Bcl-W	BCL2L2	0.008721	0.00109282	3.59852e-15	4.90194e-14	2.5294e-11	Significant
X10089.7	ASML	ASMTL	-0.0174937	0.00219174	3.66827e-15	4.98728e-14	2.57843e-11	Significant
X8231.122	VEGF sR1	FLT1	0.0374195	0.0046917	3.71397e-15	5.03968e-14	2.61055e-11	Significant
X13959.7	LAP	LAP3	0.0957749	0.012015	3.9433e-15	5.34056e-14	2.77175e-11	Significant
X21104.37	UBL5	UBL5	0.0252554	0.00317155	4.10779e-15	5.55263e-14	2.88737e-11	Significant
X21178.8	CIAO1	CIAO1	-0.0492082	0.00618755	4.46612e-15	6.02541e-14	3.13924e-11	Significant
X10737.96	Serpin B1	SERPINB1	0.0337736	0.00424953	4.6035e-15	6.19885e-14	3.2358e-11	Significant
X12954.71	PPARa	PPARA	0.0166025	0.00208985	4.9094e-15	6.59812e-14	3.45082e-11	Significant
X9761.89	LDHA	LDHA	0.0858041	0.0108176	5.18313e-15	6.95271e-14	3.64322e-11	Significant
X2942.50	Cytochrome c	CYCS	0.0327161	0.00412587	5.37138e-15	7.19151e-14	3.77554e-11	Significant
X13022.20	P5I11	TP53I11	-0.109193	0.0137973	5.92038e-15	7.91147e-14	4.16143e-11	Significant
X25499.37	DDHD2	DDHD2	0.0221159	0.00280199	6.95531e-15	9.27683e-14	4.88889e-11	Significant
X5019.16	PGP9.5	UCHL1	0.0506988	0.00642367	6.99917e-15	9.31765e-14	4.91972e-11	Significant
X23903.3	GOT2	GOT2	0.0465082	0.00592174	9.51613e-15	1.26444e-13	6.68889e-11	Significant
X21249.115	DFFA	DFFA	0.0106725	0.00136037	1.00362e-14	1.33103e-13	7.05447e-11	Significant
X9835.16	AL1A3	ALDH1A3	0.0444864	0.00567525	1.04989e-14	1.38977e-13	7.37966e-11	Significant
X11391.69	MVK	MVK	-0.0106457	0.00135814	1.07126e-14	1.41539e-13	7.52989e-11	Significant
X12016.60	CBL	CBL	0.0367057	0.00468513	1.08799e-14	1.4348e-13	7.64749e-11	Significant
X10613.33	CASC4	GOLM2	0.0354033	0.00452554	1.18503e-14	1.55985e-13	8.32958e-11	Significant
X2654.19	TNF sR-I	TNFRSF1A	0.032771	0.00420238	1.42203e-14	1.86831e-13	9.99544e-11	Significant
X12655.30	SNAB	NAPB	0.0116687	0.00149597	1.46159e-14	1.9167e-13	1.02735e-10	Significant
X21133.33	CMC4	CMC4	0.0257289	0.00330108	1.47373e-14	1.92902e-13	1.03588e-10	Significant
X12356.65	Sorcin	SRI	0.0304367	0.00390859	1.56406e-14	2.04346e-13	1.09938e-10	Significant
X2822.56	CD97	ADGRE5	0.0116579	0.00149893	1.68137e-14	2.19265e-13	1.18184e-10	Significant
X12018.84	TPK1	TPK1	0.0172483	0.00221338	1.69288e-14	2.20357e-13	1.18993e-10	Significant
X24463.1	NDRG2	NDRG2	0.0269682	0.00346972	1.73612e-14	2.25567e-13	1.22032e-10	Significant
X12731.12	PKHA7	PLEKHA7	0.011231	0.00144594	1.80775e-14	2.34441e-13	1.27067e-10	Significant
X6284.7	F150B	ALKAL2	0.0209594	0.0026989	1.81956e-14	2.35537e-13	1.27897e-10	Significant
X23593.14	M21D2	MB21D2	-0.00750474	0.000966865	1.87961e-14	2.42864e-13	1.32118e-10	Significant
X11454.87	EIF3G	EIF3G	0.029337	0.00378426	2.0162e-14	2.60034e-13	1.41719e-10	Significant
X17728.61	CHM2A	CHMP2A	0.0416519	0.00537675	2.10985e-14	2.71615e-13	1.48302e-10	Significant
X20370.6	ACYP1	ACYP1	0.0338219	0.00437304	2.32242e-14	2.98433e-13	1.63243e-10	Significant
X4192.10	AK1A1	AKR1A1	0.0468005	0.00605397	2.38771e-14	3.06263e-13	1.67832e-10	Significant
X19802.22	RCAS1	EBAG9	0.0308857	0.0040041	2.77283e-14	3.55013e-13	1.94902e-10	Significant
X15465.79	CNPY4	CNPY4	0.0477544	0.0061955	2.93631e-14	3.7526e-13	2.06393e-10	Significant
X24685.12	SNX11	SNX11	0.0198551	0.0025838	3.36091e-14	4.28745e-13	2.36239e-10	Significant
X2826.53	EDA	EDA	0.0294284	0.00383076	3.39738e-14	4.32612e-13	2.38802e-10	Significant
X7965.25	HBAT	HBQ1	-0.0737994	0.00961831	3.62583e-14	4.60487e-13	2.5486e-10	Significant
X20988.63	RP9	RP9	0.0489752	0.00638256	3.6297e-14	4.60487e-13	2.55132e-10	Significant
X16780.6	HSP 70	HSPA1A	0.038006	0.00495318	3.63594e-14	4.60487e-13	2.5557e-10	Significant
X19139.3	HSF2B	HSF2BP	-0.0279051	0.00364252	3.98323e-14	5.03564e-13	2.79982e-10	Significant
X9853.3	IFIT2	IFIT2	-0.0131032	0.00171237	4.3631e-14	5.50597e-13	3.06682e-10	Significant
X7927.16	SIA7E	ST6GALNAC5	0.0275054	0.00359817	4.50791e-14	5.67852e-13	3.16861e-10	Significant
X21495.134	GPR37	GPR37	0.0473067	0.00619733	4.86189e-14	6.11346e-13	3.41742e-10	Significant
X8024.64	TPST2	TPST2	0.0369716	0.00484673	5.04715e-14	6.33507e-13	3.54764e-10	Significant
X21172.11	MESD1	TLNRD1	0.0378412	0.00496487	5.30683e-14	6.64915e-13	3.73017e-10	Significant
X10418.36	STX12	STX12	0.0431789	0.0056689	5.51624e-14	6.89923e-13	3.87737e-10	Significant
X7748.11	NDUV2	NDUFV2	0.0246814	0.00324044	5.52884e-14	6.90271e-13	3.88622e-10	Significant
X8249.124	ALK	ALK	0.00862518	0.00113422	6.11181e-14	7.61574e-13	4.29599e-10	Significant
X8102.239	CA186	RHEX	0.0148503	0.00195327	6.12163e-14	7.61574e-13	4.30289e-10	Significant
X21111.49	HPBP1	HSPBP1	0.0126533	0.00166485	6.34586e-14	7.88076e-13	4.46051e-10	Significant
X5939.42	TWEAK	TNFSF12	0.0369926	0.00488865	7.93397e-14	9.8356e-13	5.57679e-10	Significant
X5934.1	Ferritin	FTH1|FTL	0.0480461	0.00636962	9.44634e-14	1.16898e-12	6.63983e-10	Significant
X7084.1	DRAXI	DRAXIN	0.0111713	0.00148064	9.46608e-14	1.16937e-12	6.65371e-10	Significant
X8095.213	Cyclophilin F	PPIF	0.0137683	0.00182579	9.62689e-14	1.18715e-12	6.76674e-10	Significant
X15303.63	S100A5	S100A5	0.0173651	0.00230518	1.01944e-13	1.25493e-12	7.16565e-10	Significant
X9053.16	CRIP2	CRIP2	0.0299933	0.00398455	1.07124e-13	1.31639e-12	7.52974e-10	Significant
X17404.5	ARL5B	ARL5B	-0.02678	0.00355876	1.08107e-13	1.32616e-12	7.59887e-10	Significant
X21323.2	RWDD1	RWDD1	0.0437654	0.00582105	1.13173e-13	1.38588e-12	7.95496e-10	Significant
X9265.10	GLIP1	GLIPR1	0.00935788	0.00124477	1.14403e-13	1.3985e-12	8.04138e-10	Significant
X25482.5	NFIA	NFIA	0.0280741	0.00374098	1.24996e-13	1.52534e-12	8.78596e-10	Significant
X9173.21	PGM1	PGM1	0.0132589	0.00177001	1.38284e-13	1.68457e-12	9.72e-10	Significant
X19602.36	jun-D	JUND	0.0127059	0.00169646	1.39925e-13	1.70161e-12	9.83529e-10	Significant
X9207.60	QORL1	CRYZL1	-0.0293382	0.00392801	1.64708e-13	1.99953e-12	1.15773e-09	Significant
X15324.58	Ferritin light chain	FTL	0.0487163	0.00652794	1.69788e-13	2.05766e-12	1.19344e-09	Significant
X9995.6	DUT	DUT	0.0161565	0.00216686	1.77796e-13	2.151e-12	1.24973e-09	Significant
X25299.11	NCOA7	NCOA7	0.0115615	0.00155255	1.90617e-13	2.30214e-12	1.33984e-09	Significant
X12572.236	EFS	EFS	-0.00761788	0.00102382	2.00187e-13	2.41357e-12	1.40711e-09	Significant
X13743.56	CUL4B	CUL4B	0.00606761	0.000816387	2.1244e-13	2.55692e-12	1.49324e-09	Significant
X20430.8	Natriuretic Peptide C-Type	NPPC	0.0109457	0.00147609	2.40807e-13	2.89339e-12	1.69264e-09	Significant
X21717.44	UB2Q2	UBE2Q2	0.0147687	0.00199532	2.66994e-13	3.20257e-12	1.8767e-09	Significant
X18840.205	SH21B	SH2D1B	-0.0102602	0.00139009	3.08411e-13	3.69306e-12	2.16782e-09	Significant
X5229.90	IMDH1	IMPDH1	-0.0111055	0.00150548	3.15536e-13	3.77194e-12	2.2179e-09	Significant
X12365.108	RUVB1	RUVBL1	-0.0180833	0.00245292	3.27057e-13	3.90303e-12	2.29889e-09	Significant
X8606.39	GPNMB:CD	GPNMB	0.00979973	0.00132941	3.28386e-13	3.91224e-12	2.30822e-09	Significant
X6248.68	Fas, soluble	FAS	0.0088936	0.00120685	3.39748e-13	4.04077e-12	2.38809e-09	Significant
X21118.48	GFRP	GCHFR	0.0426413	0.00579952	3.74083e-13	4.4416e-12	2.62943e-09	Significant
X12945.33	RAB18	RAB18	0.0516524	0.00702883	3.8889e-13	4.60962e-12	2.73351e-09	Significant
X4309.59	Triosephosphate isomerase	TPI1	0.032811	0.00446682	3.93182e-13	4.65265e-12	2.76368e-09	Significant
X19331.18	BAIP2	BAIAP2	0.0167168	0.00227385	4.24728e-13	5.0175e-12	2.98541e-09	Significant
X7752.31	CLC4D	CLEC4D	0.00677999	0.00092444	4.33973e-13	5.11811e-12	3.0504e-09	Significant
X13954.9	GNA1	GNPNAT1	0.0205515	0.0028033	4.35958e-13	5.13291e-12	3.06435e-09	Significant
X12381.26	CBR1	CBR1	0.0786314	0.0107172	4.39188e-13	5.1623e-12	3.08705e-09	Significant
X22059.56	PALMD	PALMD	0.0492758	0.00672588	4.52123e-13	5.30546e-12	3.17797e-09	Significant
X19119.10	DDIT3	DDIT3	0.010971	0.00149938	4.82114e-13	5.63893e-12	3.38878e-09	Significant
X9956.7	ADA15:CD	ADAM15	-0.0134549	0.0018379	4.82145e-13	5.63893e-12	3.389e-09	Significant
X8305.18	SULF2	SULF2	0.0162101	0.00221618	4.92409e-13	5.74941e-12	3.46114e-09	Significant
X6518.85	ghrelin	GHRL	0.0121322	0.0016591	5.02177e-13	5.85374e-12	3.5298e-09	Significant
X21958.4	ABR	ABR	0.0369259	0.00505636	5.34966e-13	6.22562e-12	3.76027e-09	Significant
X2670.67	CK-MM	CKM	-0.0360173	0.00493275	5.41017e-13	6.28564e-12	3.80281e-09	Significant
X6938.21	PCDGC	PCDHGA12	0.0355241	0.00487044	5.67208e-13	6.57906e-12	3.98691e-09	Significant
X11681.8	NUPL	AGFG1	0.0193211	0.0026484	5.69885e-13	6.59921e-12	4.00572e-09	Significant
X17335.18	VAMP2	VAMP2	0.0101645	0.00139334	5.72928e-13	6.62354e-12	4.02711e-09	Significant
X8033.1	DJC18	DNAJC18	0.0127845	0.00175354	5.82814e-13	6.72676e-12	4.0966e-09	Significant
X8458.111	a-Synuclein	SNCA	0.0107588	0.00147677	6.06041e-13	6.98338e-12	4.25986e-09	Significant
X5437.63	FABP	FABP3	0.0533541	0.00733587	6.5861e-13	7.57671e-12	4.62937e-09	Significant
X18308.30	STXB6	STXBP6	0.0175237	0.00241253	7.15428e-13	8.2169e-12	5.02874e-09	Significant
X9321.400	NMB	NMB	0.0410738	0.00565926	7.36645e-13	8.44678e-12	5.17788e-09	Significant
X19303.64	PT117	PET117	0.0505916	0.00697574	7.59348e-13	8.69293e-12	5.33746e-09	Significant
X9361.7	PCDC2	PCDHAC2	0.0293067	0.00404095	7.60949e-13	8.69708e-12	5.34871e-09	Significant
X15418.25	MK10	MAPK10	0.0327857	0.00452561	8.10013e-13	9.24283e-12	5.69358e-09	Significant
X5465.32	H6ST1	HS6ST1	0.0372131	0.00513779	8.11792e-13	9.24812e-12	5.70609e-09	Significant
X12463.7	KLH13	KLHL13	-0.00720432	0.000998239	9.84207e-13	1.11942e-11	6.91799e-09	Significant
X21238.40	CK5P3	CDK5RAP3	-0.0212622	0.00294965	1.04126e-12	1.1824e-11	7.31903e-09	Significant
X6321.65	PCDGA	PCDHGA10	0.0349637	0.00485919	1.1371e-12	1.28915e-11	7.9927e-09	Significant
X21281.13	CK2N2	CAMK2N2	0.0313134	0.00435418	1.16651e-12	1.32036e-11	8.19941e-09	Significant
X21152.25	EYA2	EYA2	0.0304247	0.00423338	1.20639e-12	1.3633e-11	8.47972e-09	Significant
X3453.87	LYN	LYN	-0.0151152	0.0021041	1.23042e-12	1.38822e-11	8.6486e-09	Significant
X15305.7	Secretagogin	SCGN	0.0215218	0.00300027	1.34106e-12	1.51063e-11	9.42632e-09	Significant
X14318.1	VPS29	VPS29	-0.0344762	0.00480447	1.42255e-12	1.59986e-11	9.99912e-09	Significant
X7194.36	NPTN	NPTN	0.0406123	0.0056764	1.50984e-12	1.69531e-11	1.06127e-08	Significant
X21141.9	FA84B	LRATD2	0.0194875	0.00272471	1.54592e-12	1.73306e-11	1.08663e-08	Significant
X23569.53	STA10	STARD10	0.0411586	0.00575741	1.57599e-12	1.76348e-11	1.10776e-08	Significant
X19241.31	RBP-III	RBP5	-0.0100576	0.00140685	1.57808e-12	1.76348e-11	1.10923e-08	Significant
X14287.6	RAB5C	RAB5C	-0.0179565	0.00251452	1.67342e-12	1.86706e-11	1.17625e-08	Significant
X12345.4	APC10	ANAPC10	0.00577114	0.000808696	1.71766e-12	1.91338e-11	1.20734e-08	Significant
X8916.32	STIM1:CD	STIM1	0.00757029	0.00106089	1.73438e-12	1.92894e-11	1.21909e-08	Significant
X24497.8	TRIML	TRIML1	-0.0080206	0.00112387	1.75088e-12	1.94422e-11	1.23069e-08	Significant
X8760.10	DCNL5	DCUN1D5	-0.0392501	0.00550721	1.85137e-12	2.05257e-11	1.30133e-08	Significant
X14291.53	AGAP2	AGAP2	0.0150872	0.00211784	1.88281e-12	2.08413e-11	1.32342e-08	Significant
X7060.2	ERO1A	ERO1A	0.0223231	0.00313967	2.07186e-12	2.2898e-11	1.45631e-08	Significant
X23691.2	TTL12	TTLL12	-0.00812738	0.00114533	2.2734e-12	2.50859e-11	1.59797e-08	Significant
X3381.24	LYNB	LYN	-0.0490131	0.00690887	2.29855e-12	2.53237e-11	1.61565e-08	Significant
X12777.11	SF01	SF1	0.00513763	0.000724264	2.32257e-12	2.55483e-11	1.63253e-08	Significant
X24911.57	LRP	MVP	-0.00979249	0.00138242	2.47174e-12	2.7135e-11	1.73739e-08	Significant
X25486.38	RM38	MRPL38	-0.011044	0.00155871	2.47454e-12	2.7135e-11	1.73936e-08	Significant
X20445.29	AP1AR	AP1AR	0.0669852	0.00945913	2.5043e-12	2.74185e-11	1.76027e-08	Significant
X3714.49	CK-MB	CKB|CKM	-0.119532	0.0168999	2.6686e-12	2.9172e-11	1.87576e-08	Significant
X19581.15	IGFBP-5	IGFBP5	0.0199948	0.00282756	2.69774e-12	2.94367e-11	1.89624e-08	Significant
X10785.8	LRC52	LRRC52	0.0308541	0.00435649	2.70119e-12	2.94367e-11	1.89867e-08	Significant
X12721.4	TAXB1	TAX1BP1	0.024165	0.00341871	2.75212e-12	2.99452e-11	1.93446e-08	Significant
X3421.54	CD30 Ligand	TNFSF8	0.0285769	0.00405246	3.09057e-12	3.35759e-11	2.17236e-08	Significant
X4968.50	CAPG	CAPG	0.0475796	0.00674579	3.14144e-12	3.40758e-11	2.20811e-08	Significant
X12458.79	CHP1	CHP1	0.0291082	0.00413581	3.38536e-12	3.66652e-11	2.37957e-08	Significant
X22955.28	CRBP	RBP1	0.0241021	0.00342723	3.53715e-12	3.82502e-11	2.48626e-08	Significant
X11286.78	SELS	SELENOS	-0.0693904	0.00987277	3.61298e-12	3.90102e-11	2.53956e-08	Significant
X10351.51	IRF1	IRF1	-0.0225576	0.00321178	3.76244e-12	4.05617e-11	2.64462e-08	Significant
X23403.64	BORG4	CDC42EP4	0.0369514	0.00526968	4.06776e-12	4.3786e-11	2.85923e-08	Significant
X12612.37	PSB1	PSMB1	0.0491555	0.00701321	4.12927e-12	4.43802e-11	2.90247e-08	Significant
X22984.10	IF4A2	EIF4A2	0.0497183	0.00709896	4.28803e-12	4.60161e-11	3.01405e-08	Significant
X23329.52	RAB4B	RAB4B	-0.0731207	0.0104414	4.29638e-12	4.60354e-11	3.01992e-08	Significant
X18225.13	HEBP1	HEBP1	0.0499267	0.00714132	4.66827e-12	4.99441e-11	3.28133e-08	Significant
X21194.39	PO6F1	POU6F1	0.0202613	0.0029017	5.01095e-12	5.35288e-11	3.5222e-08	Significant
X19264.6	RFA2	RPA2	-0.00637977	0.000915749	5.55668e-12	5.92685e-11	3.90579e-08	Significant
X23665.35	PRS6A	PSMC3	-0.0119978	0.00172299	5.68405e-12	6.05351e-11	3.99532e-08	Significant
X2642.4	PAFAH beta subunit	PAFAH1B2	0.0275666	0.0039597	5.71923e-12	6.08176e-11	4.02005e-08	Significant
X3416.2	BTK	BTK	-0.0153428	0.0022049	5.84493e-12	6.20604e-11	4.1084e-08	Significant
X13240.170	SHAN1	SHANK1	0.0111476	0.00160243	5.93124e-12	6.28819e-11	4.16907e-08	Significant
X12510.3	STAP1	STAP1	-0.010819	0.0015588	6.60578e-12	6.99277e-11	4.6432e-08	Significant
X10396.6	Mcl-1	MCL1	0.0177149	0.00255517	6.97814e-12	7.37585e-11	4.90494e-08	Significant
X24226.30	Fascin	FSCN1	0.0392803	0.0056665	7.01097e-12	7.39942e-11	4.92801e-08	Significant
X11368.32	KAD2	AK2	0.0384825	0.00555588	7.24182e-12	7.6316e-11	5.09028e-08	Significant
X17393.13	SCAD	ACADS	0.0132831	0.00191891	7.5106e-12	7.90299e-11	5.2792e-08	Significant
X8892.14	PEAR1:CD	PEAR1	0.00991248	0.00143618	8.62251e-12	9.05944e-11	6.06076e-08	Significant
X12620.3	Septin-11	SEPTIN11	0.033544	0.00486259	8.76641e-12	9.19688e-11	6.16191e-08	Significant
X18950.13	RAC2	RAC2	-0.0132704	0.0019245	8.99515e-12	9.42279e-11	6.32269e-08	Significant
X12603.87	PABP4	PABPC4	0.0120531	0.00175016	9.51193e-12	9.94931e-11	6.68594e-08	Significant
X25260.62	CO017	FAM219B	0.00883822	0.00128401	9.75758e-12	1.01911e-10	6.8586e-08	Significant
X12486.8	GLRX2	GLRX2	0.0190016	0.00276081	9.85664e-12	1.02793e-10	6.92823e-08	Significant
X3471.49	STK16	STK16	0.0159773	0.00232164	9.91198e-12	1.03217e-10	6.96713e-08	Significant
X15693.9	PgR	PGR	0.030371	0.00441686	1.01883e-11	1.05937e-10	7.16136e-08	Significant
X23695.1	FSD1	FSD1	0.00616323	0.000896435	1.02814e-11	1.06748e-10	7.22681e-08	Significant
X5620.13	AMD	PAM	0.0619153	0.00901585	1.07893e-11	1.11856e-10	7.58382e-08	Significant
X21508.7	SIA8A	ST8SIA1	-0.034843	0.00507691	1.11138e-11	1.1505e-10	7.81188e-08	Significant
X19228.11	BAG-2	BAG2	0.0103436	0.00150998	1.22538e-11	1.26665e-10	8.61321e-08	Significant
X18904.23	KCC4	CAMK4	0.00831184	0.00121382	1.23342e-11	1.27308e-10	8.66969e-08	Significant
X9182.3	sLRP1:ECD	LRP1	0.0281104	0.00410541	1.23598e-11	1.27386e-10	8.68771e-08	Significant
X23644.19	DAK	TKFC	0.0225051	0.00328869	1.27993e-11	1.31722e-10	8.9966e-08	Significant
X22970.8	GIPC1	GIPC1	0.0165294	0.00241967	1.38193e-11	1.42012e-10	9.7136e-08	Significant
X19158.1	PAF	PCLAF	0.0511277	0.00749178	1.43721e-11	1.47476e-10	1.01021e-07	Significant
X9459.7	Fas, soluble	FAS	0.0420661	0.00616544	1.45468e-11	1.49052e-10	1.02249e-07	Significant
X9027.10	NLGN2:CD	NLGN2	0.00665676	0.000976678	1.53064e-11	1.56558e-10	1.07589e-07	Significant
X8394.56	RNase 2	RNASE2	0.0128441	0.0018843	1.53239e-11	1.56558e-10	1.07712e-07	Significant
X9884.8	PPIL1	PPIL1	0.0135953	0.00199625	1.58906e-11	1.62112e-10	1.11695e-07	Significant
X5110.84	NRX1B	NRXN1	0.0525779	0.00772229	1.60124e-11	1.63118e-10	1.12551e-07	Significant
X20133.1	MAGE-3	MAGEA3	-0.0295857	0.00435048	1.69701e-11	1.72624e-10	1.19283e-07	Significant
X17784.23	GMFB	GMFB	0.0646146	0.00950489	1.77217e-11	1.80008e-10	1.24566e-07	Significant
X11262.39	TRABD	TRABD	0.0137386	0.00202259	1.79335e-11	1.81897e-10	1.26054e-07	Significant
X8028.22	SPINK5	SPINK5	0.0126114	0.00185626	1.79844e-11	1.8215e-10	1.26412e-07	Significant
X20439.14	PROSC	PLPBP	0.0323843	0.00477698	1.94847e-11	1.97062e-10	1.36958e-07	Significant
X20999.12	RL5	RPL5	-0.013293	0.0019615	1.98148e-11	2.00113e-10	1.39278e-07	Significant
X5004.69	MK11	MAPK11	0.00914149	0.00135012	2.06022e-11	2.07766e-10	1.44813e-07	Significant
X21130.82	ITPK1	ITPK1	0.0434622	0.0064216	2.09789e-11	2.11261e-10	1.4746e-07	Significant
X21239.31	CYH1	CYTH1	0.00971079	0.0014351	2.12321e-11	2.13505e-10	1.4924e-07	Significant
X12691.44	GLYM	SHMT2	-0.0180636	0.002673	2.24511e-11	2.25441e-10	1.57809e-07	Significant
X18181.2	TSSC4	TSSC4	0.0192684	0.00285145	2.25374e-11	2.25985e-10	1.58415e-07	Significant
X9076.25	PENK	PENK	0.0739707	0.0109557	2.35474e-11	2.35776e-10	1.65514e-07	Significant
X19289.29	DCUP	UROD	0.0564724	0.00836661	2.42332e-11	2.42297e-10	1.70335e-07	Significant
X22833.74	ZCC18	ZCCHC18	0.0228372	0.00338588	2.44779e-11	2.44397e-10	1.72055e-07	Significant
X9901.28	EGLN1	EGLN1	-0.00848214	0.00126007	2.68358e-11	2.67559e-10	1.88629e-07	Significant
X24011.27	VS10L	VSIG10L	0.0147592	0.00219067	2.70551e-11	2.69363e-10	1.9017e-07	Significant
X25041.11	F264	PFKFB4	-0.00747225	0.00111081	2.7809e-11	2.76477e-10	1.95469e-07	Significant
X17456.53	GOLM1	GOLM1	0.027754	0.00412708	2.79266e-11	2.77255e-10	1.96296e-07	Significant
X21706.29	LIRA1	LILRA1	0.046996	0.00698842	2.83615e-11	2.81175e-10	1.99353e-07	Significant
X6962.5	DRB3	HLA-DRB3	-0.0467086	0.00695465	2.95493e-11	2.92538e-10	2.07702e-07	Significant
X17751.68	CRBB1	CRYBB1	0.0250532	0.00373363	3.08302e-11	3.0479e-10	2.16706e-07	Significant
X14178.18	CDKN3	CDKN3	0.016304	0.00243194	3.22042e-11	3.17926e-10	2.26363e-07	Significant
X7981.230	B3GT6	B3GALT6	0.010643	0.00158789	3.24528e-11	3.19931e-10	2.28111e-07	Significant
X21895.36	IFNL4	None	-0.0064471	0.000962991	3.41065e-11	3.35763e-10	2.39735e-07	Significant
X20936.8	TATD3	TATDN3	0.0138675	0.0020742	3.64143e-11	3.57981e-10	2.55956e-07	Significant
X6919.3	HBAZ	HBZ	-0.015699	0.00234802	3.65512e-11	3.58438e-10	2.56919e-07	Significant
X17332.3	ARHL2	ADPRS	0.0407698	0.00609952	3.65628e-11	3.58438e-10	2.57e-07	Significant
X21105.23	U119B	UNC119B	0.0132253	0.0019854	4.27109e-11	4.18127e-10	3.00215e-07	Significant
X9249.17	TMEM9:ECD	TMEM9	0.0358023	0.00537874	4.38142e-11	4.28331e-10	3.0797e-07	Significant
X11568.2	FKB1B	FKBP1B	0.00974152	0.00146492	4.632e-11	4.52199e-10	3.25583e-07	Significant
X6304.8	C1QT1	C1QTNF1	0.030866	0.00464475	4.70364e-11	4.58556e-10	3.30619e-07	Significant
X5065.8	CD83	CD83	0.0274794	0.00413791	4.83928e-11	4.71126e-10	3.40153e-07	Significant
X17769.28	PCNP	PCNP	0.00883217	0.00133084	5.00941e-11	4.87015e-10	3.52112e-07	Significant
X9793.145	IGDC4	IGDCC4	0.0283148	0.00427045	5.19519e-11	5.04379e-10	3.6517e-07	Significant
X9337.43	TKN1	TAC1	0.0296715	0.00447453	5.26443e-11	5.10395e-10	3.70037e-07	Significant
X11204.80	CXAR	CXADR	0.00705152	0.00106402	5.30687e-11	5.13802e-10	3.7302e-07	Significant
X10576.7	PXDC2:ECD	PLXDC2	0.0311284	0.0046981	5.34963e-11	5.17229e-10	3.76026e-07	Significant
X24670.1	PIHD1	PIH1D1	0.0129091	0.00194845	5.37544e-11	5.19011e-10	3.7784e-07	Significant
X6511.17	F19A4	TAFA4	0.0127223	0.00192097	5.46455e-11	5.26891e-10	3.84103e-07	Significant
X3073.51	IL-18 BPa	IL18BP	0.0266721	0.00403569	5.96579e-11	5.74432e-10	4.19335e-07	Significant
X22588.35	AGRB2	ADGRB2	0.0456718	0.00692075	6.34607e-11	6.10213e-10	4.46066e-07	Significant
X16057.6	IGF-II receptor	IGF2R	0.0279471	0.00423822	6.57072e-11	6.3095e-10	4.61856e-07	Significant
X4991.12	GPC5	GPC5	0.0338452	0.00515303	7.77782e-11	7.45317e-10	5.46703e-07	Significant
X19742.3	Septin-5	SEPTIN5	0.0229417	0.00349215	7.78294e-11	7.45317e-10	5.47063e-07	Significant
X8785.1	ARMC5:ARM 5	ARMC5	0.00447837	0.000681946	7.82991e-11	7.48795e-10	5.50364e-07	Significant
X23416.47	Sorting nexin-15	SNX15	0.0344408	0.00526305	9.11242e-11	8.70261e-10	6.40512e-07	Significant
X22043.174	HSP70 protein 2	HSPA2	0.0365896	0.00559913	9.62475e-11	9.17943e-10	6.76524e-07	Significant
X5343.74	CBPE	CPE	0.0385478	0.00590148	9.85494e-11	9.38623e-10	6.92704e-07	Significant
X11067.13	Osteocalcin	BGLAP	0.0406698	0.00622868	9.99672e-11	9.50839e-10	7.0267e-07	Significant
X13544.9	HMHA1	ARHGAP45	-0.0103439	0.00158595	1.04614e-10	9.93692e-10	7.35332e-07	Significant
X17739.1	HCDH	HADH	-0.0160777	0.00246551	1.05458e-10	1.00036e-09	7.41264e-07	Significant
X8967.6	DUS26	DUSP26	0.0159506	0.00245093	1.15238e-10	1.09165e-09	8.10005e-07	Significant
X18215.5	THG1	THG1L	-0.0111805	0.00171837	1.16133e-10	1.09866e-09	8.16302e-07	Significant
X8983.7	GOLM1	GOLM1	0.0260918	0.00401078	1.16375e-10	1.09946e-09	8.18001e-07	Significant
X19262.219	ACADV	ACADVL	-0.00924446	0.00142156	1.18816e-10	1.12101e-09	8.35155e-07	Significant
X17792.158	SSDH	ALDH5A1	0.0159096	0.00244706	1.1986e-10	1.12935e-09	8.42498e-07	Significant
X20054.28	Aconitase 1	ACO1	0.0336193	0.00517305	1.21893e-10	1.14697e-09	8.56784e-07	Significant
X12386.11	AMPB	RNPEP	0.0198998	0.00305776	1.26472e-10	1.18847e-09	8.88972e-07	Significant
X11615.16	DAPP1	DAPP1	-0.0203901	0.0031419	1.29509e-10	1.21538e-09	9.10318e-07	Significant
X8086.49	ITM2B	ITM2B	0.0282144	0.0043547	1.38984e-10	1.30256e-09	9.76921e-07	Significant
X8748.45	HG2A	CD74	-0.00732667	0.0011318	1.42856e-10	1.33706e-09	1.00413e-06	Significant
X13941.82	SYFM	FARS2	-0.00714622	0.00110439	1.45186e-10	1.35706e-09	1.02051e-06	Significant
X21770.18	B3GA1	B3GAT1	0.0387266	0.00601115	1.73886e-10	1.62317e-09	1.22224e-06	Significant
X16875.13	MGN2	MAGOHB	-0.00991336	0.00154007	1.80882e-10	1.68623e-09	1.27142e-06	Significant
X25284.47	UBA6	UBA6	-0.019442	0.00302167	1.84104e-10	1.714e-09	1.29407e-06	Significant
X24920.6	GLSK	GLS	0.00834855	0.00129806	1.94346e-10	1.80696e-09	1.36606e-06	Significant
X15476.6	REG3G	REG3G	-0.0245607	0.00382275	1.97456e-10	1.83345e-09	1.38792e-06	Significant
X17778.19	RAB32	RAB32	-0.00912208	0.0014204	1.97991e-10	1.83599e-09	1.39168e-06	Significant
X21595.8	CCD43	CCDC43	0.0234771	0.00365973	2.11305e-10	1.95687e-09	1.48526e-06	Significant
X9999.1	IRF6	IRF6	-0.0210226	0.00328205	2.20109e-10	2.03572e-09	1.54715e-06	Significant
X20402.11	TPC2A	TRAPPC2	0.0131265	0.00205058	2.2627e-10	2.08995e-09	1.59045e-06	Significant
X6294.11	BAGE2	BAGE2	0.0161423	0.00252265	2.29667e-10	2.11854e-09	1.61433e-06	Significant
X21780.15	ABHD4	ABHD4	0.0344809	0.00539205	2.36436e-10	2.17813e-09	1.66191e-06	Significant
X12859.33	PECI	ECI2	0.00810595	0.00126828	2.4143e-10	2.22078e-09	1.69701e-06	Significant
X8889.5	CCPG1	CCPG1	0.0071618	0.00112063	2.41698e-10	2.22078e-09	1.6989e-06	Significant
X11708.2	LCN1	LCN1	-0.0114557	0.00179303	2.47587e-10	2.27192e-09	1.74029e-06	Significant
X10575.31	PUF60	PUF60	0.0223628	0.00350826	2.68646e-10	2.46195e-09	1.88831e-06	Significant
X8405.108	ADAM 10:ECD	ADAM10	-0.00909662	0.00142881	2.82191e-10	2.58271e-09	1.98352e-06	Significant
X3800.71	CK-BB	CKB	0.00800946	0.00125802	2.83978e-10	2.59568e-09	1.99608e-06	Significant
X12521.3	CDN2C	CDKN2C	-0.00951546	0.0014951	2.85895e-10	2.60981e-09	2.00955e-06	Significant
X20185.44	ODP2	DLAT	0.00434578	0.000682988	2.88226e-10	2.62768e-09	2.02594e-06	Significant
X14106.46	GDP/GTP exchange protein	RAP1GDS1	0.00420764	0.000662979	3.19237e-10	2.9036e-09	2.24392e-06	Significant
X16754.40	CSKP	CASK	0.00816687	0.00128658	3.19318e-10	2.9036e-09	2.24448e-06	Significant
X10006.25	ELK1	ELK1	-0.00669041	0.0010544	3.21342e-10	2.91823e-09	2.25871e-06	Significant
X12534.10	CACO2	CALCOCO2	0.0268468	0.0042318	3.24177e-10	2.94018e-09	2.27864e-06	Significant
X18837.9	SGTB	SGTB	0.0508505	0.00801832	3.28299e-10	2.97373e-09	2.30761e-06	Significant
X3363.31	CSK	CSK	-0.0486646	0.00768585	3.49357e-10	3.1604e-09	2.45563e-06	Significant
X5598.3	GREM2	GREM2	0.00660271	0.00104389	3.6568e-10	3.30381e-09	2.57036e-06	Significant
X7003.4	GLT10	GALNT10	0.0104651	0.00165591	3.86748e-10	3.48967e-09	2.71845e-06	Significant
X21009.28	SNTAN	SNTN	0.00541168	0.00085727	3.95352e-10	3.56273e-09	2.77893e-06	Significant
X6217.23	QSCN6	QSOX1	0.0279163	0.0044258	4.0673e-10	3.66057e-09	2.8589e-06	Significant
X19195.85	RS5	RPS5	-0.0169752	0.00269217	4.12962e-10	3.71191e-09	2.90271e-06	Significant
X4905.63	Coactosin-like protein	COTL1	0.0433591	0.00687666	4.19189e-10	3.76307e-09	2.94648e-06	Significant
X25253.17	GNAS	GNAS|GNAS	-0.00610176	0.000968138	4.21093e-10	3.77533e-09	2.95986e-06	Significant
X5248.68	Cyclophilin F	PPIF	0.018025	0.00286133	4.29055e-10	3.84182e-09	3.01583e-06	Significant
X13516.46	TMM85	EMC4	0.0577012	0.00916887	4.44818e-10	3.9779e-09	3.12663e-06	Significant
X10064.12	RBBP9	RBBP9	0.00636593	0.00101279	4.6814e-10	4.18114e-09	3.29056e-06	Significant
X3859.50	PSA1	PSMA1	0.0108987	0.00173757	5.11411e-10	4.56181e-09	3.59471e-06	Significant
X12704.26	SH2D3	SH2D3C	-0.00940245	0.00150067	5.33257e-10	4.75065e-09	3.74826e-06	Significant
X21247.16	METK1	MAT1A	0.0155134	0.00247551	5.36385e-10	4.77247e-09	3.77025e-06	Significant
X8923.94	GLTL1	GALNT16	0.0280328	0.00448111	5.61562e-10	4.99017e-09	3.94722e-06	Significant
X20441.35	RPAB1	POLR2E	-0.00831426	0.00133002	5.7682e-10	5.11928e-09	4.05447e-06	Significant
X8838.10	CASC4	GOLM2	0.0103549	0.00165684	5.84648e-10	5.18221e-09	4.10949e-06	Significant
X7717.95	CFTR	CFTR	0.0155507	0.00249161	6.19159e-10	5.48119e-09	4.35207e-06	Significant
X13062.4	GMFG	GMFG	0.0362373	0.00581159	6.3973e-10	5.65618e-09	4.49666e-06	Significant
X23302.19	AKTS1	AKT1S1	0.0131964	0.00211665	6.44172e-10	5.6883e-09	4.52788e-06	Significant
X2570.72	IGFBP-2	IGFBP2	0.0323643	0.00519207	6.45266e-10	5.69081e-09	4.53557e-06	Significant
X13983.27	QOR	CRYZ	0.0113627	0.00182822	7.31645e-10	6.44452e-09	5.14273e-06	Significant
X12775.6	HMGB3	HMGB3	-0.00796806	0.00128487	7.86642e-10	6.92028e-09	5.52931e-06	Significant
X8908.14	KCE1L:CD	KCNE5	0.0434588	0.0070095	7.92239e-10	6.96081e-09	5.56865e-06	Significant
X12663.1	THTR	TST	0.0466126	0.00753362	8.58508e-10	7.53365e-09	6.03445e-06	Significant
X5744.12	CA056	MENT	0.0100532	0.00162599	8.89407e-10	7.79506e-09	6.25164e-06	Significant
X12825.18	DP13A	APPL1	0.0115688	0.00187148	8.99865e-10	7.8769e-09	6.32515e-06	Significant
X17696.1	TIRP	TICAM2	-0.0199624	0.00323587	9.57974e-10	8.37512e-09	6.7336e-06	Significant
X19280.29	UB2D3	UBE2D3	0.0615447	0.0099846	9.86173e-10	8.61095e-09	6.93181e-06	Significant
X7769.29	3BP2	SH3BP2	0.00714424	0.00115907	9.89264e-10	8.62722e-09	6.95354e-06	Significant
X8068.43	K1161:ECD	MYORG	0.00956807	0.00155345	1.01831e-09	8.86949e-09	7.15768e-06	Significant
X10894.25	Secretagogin	SCGN	0.0142078	0.0023077	1.03409e-09	8.99584e-09	7.26864e-06	Significant
X6372.7	YBOX2	YBX2	-0.0118658	0.00192824	1.05438e-09	9.161e-09	7.41125e-06	Significant
X19270.26	SYYC	YARS1	-0.0129076	0.00210026	1.106e-09	9.5976e-09	7.77406e-06	Significant
X13438.115	CHRD	CHRD	0.0327205	0.00532485	1.11024e-09	9.62254e-09	7.80388e-06	Significant
X21533.51	LSP1	LSP1	-0.0109077	0.00177573	1.12532e-09	9.74119e-09	7.90985e-06	Significant
X5452.71	ASGR1	ASGR1	-0.00832966	0.0013561	1.12714e-09	9.745e-09	7.92268e-06	Significant
X4992.49	GRN	GRN	0.0262167	0.00427036	1.14853e-09	9.91774e-09	8.07304e-06	Significant
X12403.30	RB39B	RAB39B	0.00986734	0.00160734	1.15112e-09	9.92791e-09	8.09125e-06	Significant
X23559.10	DDRGK	DDRGK1	0.027218	0.0044395	1.2084e-09	1.04091e-08	8.49387e-06	Significant
X18925.24	Proteasome subunit alpha type 5	PSMA5	0.0280743	0.00457933	1.219e-09	1.04876e-08	8.56837e-06	Significant
X14083.25	SPS1	SEPHS1	0.0160733	0.00262466	1.26217e-09	1.08457e-08	8.87176e-06	Significant
X10945.11	Syntaxin-6	STX6	0.0225844	0.00368797	1.26586e-09	1.08641e-08	8.89774e-06	Significant
X10000.28	CRBB2	CRYBB2	0.00566065	0.000924679	1.29858e-09	1.11313e-08	9.1277e-06	Significant
X12831.21	TESC	TESC	0.0106826	0.0017456	1.30214e-09	1.11483e-08	9.15276e-06	Significant
X3315.15	GPC2	GPC2	0.0131686	0.0021524	1.30834e-09	1.11877e-08	9.19629e-06	Significant
X8759.29	a1,4-Galactosyltransferase	A4GALT	-0.0348297	0.00569377	1.31261e-09	1.12106e-08	9.22631e-06	Significant
X12652.37	SAHH2	AHCYL1	-0.00875696	0.00143333	1.3784e-09	1.17582e-08	9.68879e-06	Significant
X9013.60	NET1	NTN1	0.0283375	0.00463917	1.39155e-09	1.1856e-08	9.78121e-06	Significant
X19279.42	CRBP	RBP1	0.0179765	0.00294352	1.40148e-09	1.19262e-08	9.85102e-06	Significant
X21369.15	RTCA	RTCA	-0.0257743	0.00422773	1.49276e-09	1.26875e-08	1.04926e-05	Significant
X6405.74	PSG2	PSG2	-0.00766279	0.00125808	1.54215e-09	1.30915e-08	1.08398e-05	Significant
X12580.7	PSB5	PSMB5	0.0260335	0.00427522	1.56194e-09	1.32435e-08	1.09789e-05	Significant
X11556.19	ARFG1	ARFGAP1	-0.0108971	0.00178975	1.56496e-09	1.32531e-08	1.10001e-05	Significant
X21933.7	UBA7	UBA7	-0.0121716	0.00200321	1.68713e-09	1.42706e-08	1.18588e-05	Significant
X5650.9	PDIA6	PDIA6	0.0278722	0.00458831	1.69759e-09	1.43418e-08	1.19324e-05	Significant
X7928.183	TPST1	TPST1	0.0259467	0.00427665	1.77672e-09	1.49923e-08	1.24886e-05	Significant
X13933.276	NAB1	NAB1	-0.00715087	0.00118001	1.85835e-09	1.56622e-08	1.30623e-05	Significant
X10924.258	NEUFC	CYB5D2	0.0135048	0.00222869	1.86158e-09	1.56707e-08	1.3085e-05	Significant
X2972.57	BMP-7	BMP7	0.0245456	0.00405278	1.89511e-09	1.59339e-08	1.33207e-05	Significant
X4423.77	BCL2-like 1 protein	BCL2L1	0.0052801	0.000872433	1.95417e-09	1.64108e-08	1.37358e-05	Significant
X22844.4	ZSWM7	ZSWIM7	0.00730265	0.00120705	1.98895e-09	1.6683e-08	1.39803e-05	Significant
X12478.15	RL30	RPL30	-0.0623548	0.0103145	2.02465e-09	1.69622e-08	1.42313e-05	Significant
X3835.11	TLR2	TLR2	-0.00736729	0.00121946	2.07902e-09	1.7397e-08	1.46134e-05	Significant
X15542.19	KCRU	CKMT1A	0.0461729	0.00764382	2.08555e-09	1.74308e-08	1.46593e-05	Significant
X12619.14	Protein phophatase 2Ca	PPM1A	0.0155828	0.00258292	2.19283e-09	1.83057e-08	1.54134e-05	Significant
X14151.4	UCRP	ISG15	0.0227138	0.00377563	2.42203e-09	2.01951e-08	1.70245e-05	Significant
X8954.30	M4K1	MAP4K1	0.0205409	0.00341453	2.43609e-09	2.02882e-08	1.71233e-05	Significant
X3813.3	FYN	FYN	0.00482383	0.000802184	2.45634e-09	2.04326e-08	1.72656e-05	Significant
X3022.4	CTLA-4	CTLA4	0.0126011	0.0020952	2.47658e-09	2.05767e-08	1.74079e-05	Significant
X18408.26	ARF4	ARF4	-0.00600733	0.0009993	2.4995e-09	2.07426e-08	1.7569e-05	Significant
X6517.14	BMP-3b	GDF10	0.0106707	0.00177444	2.51571e-09	2.08479e-08	1.76829e-05	Significant
X13529.39	NP1L2	NAP1L2	-0.025058	0.0041699	2.51811e-09	2.08479e-08	1.76998e-05	Significant
X12392.30	ARL1	ARL1	-0.0135968	0.00226849	2.77079e-09	2.2888e-08	1.94759e-05	Significant
X7128.9	VWA2	VWA2	0.0187578	0.00312991	2.77105e-09	2.2888e-08	1.94777e-05	Significant
X7934.11	NDRG4	NDRG4	0.034937	0.00583502	2.86461e-09	2.36331e-08	2.01354e-05	Significant
X23414.12	ZN483	ZNF483	-0.0134451	0.00224613	2.90907e-09	2.39717e-08	2.04478e-05	Significant
X9180.6	INGR2:ECD	IFNGR2	0.0111533	0.00186464	2.97334e-09	2.44726e-08	2.08996e-05	Significant
X2742.68	Siglec-7	SIGLEC7	0.0495154	0.00828055	2.99603e-09	2.46305e-08	2.10591e-05	Significant
X21112.6	MLRS	MYLPF	-0.0104534	0.00174796	3.04055e-09	2.49674e-08	2.13721e-05	Significant
X20167.6	RAB8B	RAB8B	-0.0305424	0.00511051	3.0591e-09	2.50904e-08	2.15024e-05	Significant
X13937.75	CAND1	CAND1	0.0735209	0.0122931	3.09456e-09	2.53516e-08	2.17517e-05	Significant
X18824.7	IF4A2	EIF4A2	0.0303159	0.00508018	3.23687e-09	2.64866e-08	2.2752e-05	Significant
X5493.17	WNK3	WNK3	0.0188285	0.00315509	3.24297e-09	2.65056e-08	2.27948e-05	Significant
X15483.377	Agrin	AGRN	0.0257222	0.00431711	3.41075e-09	2.78445e-08	2.39741e-05	Significant
X7105.7	CABL2	CABLES2	0.00957174	0.00160712	3.46934e-09	2.829e-08	2.4386e-05	Significant
X5424.55	RANK	TNFRSF11A	0.0135325	0.00227379	3.55607e-09	2.89636e-08	2.49956e-05	Significant
X18868.7	CBX3	CBX3	-0.0071874	0.00120808	3.5935e-09	2.92347e-08	2.52587e-05	Significant
X11369.23	ADHX	ADH5	-0.00856202	0.00144178	3.84933e-09	3.12797e-08	2.7057e-05	Significant
X12578.13	ARF3	ARF3	0.00611658	0.00103133	4.01895e-09	3.26203e-08	2.82492e-05	Significant
X24695.8	PKHB1	PLEKHB1	0.0321991	0.00543143	4.06888e-09	3.29875e-08	2.86002e-05	Significant
X17329.2	BDH2	BDH2	-0.0197844	0.00333891	4.1651e-09	3.37287e-08	2.92765e-05	Significant
X6966.144	STX1B	STX1B	0.00436521	0.000737804	4.376e-09	3.53957e-08	3.07589e-05	Significant
X11128.29	T132C:CD	TMEM132C	0.0109848	0.00185693	4.39473e-09	3.55064e-08	3.08906e-05	Significant
X10876.300	BRAT1	BRAT1	0.00529727	0.000895722	4.44408e-09	3.58639e-08	3.12374e-05	Significant
X17671.58	ING4	ING4	0.00963057	0.00162726	4.50323e-09	3.62995e-08	3.16532e-05	Significant
X5701.81	Tetranectin	CLEC3B	0.0153833	0.00260272	4.51822e-09	3.63787e-08	3.17586e-05	Significant
X9451.20	Uromodulin	UMOD	0.0532333	0.00902418	4.85038e-09	3.90084e-08	3.40933e-05	Significant
X14085.28	IL-13	IL13	-0.0606331	0.010305	5.28509e-09	4.24559e-08	3.71489e-05	Significant
X6064.4	TXNDC4	ERP44	0.0269251	0.00458024	5.45212e-09	4.37477e-08	3.83229e-05	Significant
X17722.5	FKBP52 protein	FKBP4	0.0324255	0.00551728	5.50265e-09	4.41028e-08	3.86781e-05	Significant
X3197.70	IDE	IDE	-0.00895622	0.00152546	5.70761e-09	4.56934e-08	4.01188e-05	Significant
X7628.40	CREL1	CRELD1	0.0449007	0.0076518	5.8218e-09	4.65545e-08	4.09214e-05	Significant
X11180.17	SMRC1	SMARCC1	-0.00624452	0.00106461	5.93251e-09	4.73165e-08	4.16996e-05	Significant
X12334.25	cSHMT	SHMT1	-0.00707256	0.00120606	5.93425e-09	4.73165e-08	4.17119e-05	Significant
X25265.8	FNBP1	FNBP1	-0.00852961	0.00145458	5.93728e-09	4.73165e-08	4.17331e-05	Significant
X15318.75	Calpactin I light chain	S100A10	-0.0158884	0.00271192	6.18621e-09	4.92444e-08	4.34828e-05	Significant
X17797.1	CUL1	CUL1	0.00612873	0.00104811	6.56281e-09	5.21833e-08	4.613e-05	Significant
X9971.5	CSMD2	CSMD2	0.0231099	0.00395376	6.62897e-09	5.26497e-08	4.6595e-05	Significant
X16914.104	sCD14	CD14	0.019359	0.00331228	6.64489e-09	5.27166e-08	4.67069e-05	Significant
X23621.326	TIM13	TIMM13	-0.0218936	0.00374694	6.71272e-09	5.31947e-08	4.71837e-05	Significant
X14134.49	AMGO2	AMIGO2	0.0332866	0.00569793	6.75951e-09	5.35052e-08	4.75126e-05	Significant
X22094.15	CB073	C2orf73	0.0155628	0.00266584	6.91791e-09	5.46974e-08	4.8626e-05	Significant
X23395.5	KHDR2	KHDRBS2	0.00931461	0.00159577	6.94996e-09	5.4889e-08	4.88512e-05	Significant
X24681.2	SERB	PSPH	-0.0222023	0.00380708	7.18109e-09	5.65943e-08	5.04759e-05	Significant
X12587.65	ARL2	ARL2	-0.0653676	0.0112099	7.18198e-09	5.65943e-08	5.04821e-05	Significant
X19110.6	MEMO1	MEMO1	0.0121198	0.00207827	7.19578e-09	5.66396e-08	5.05791e-05	Significant
X5029.3	SEPR	FAP	-0.0106912	0.00183354	7.23567e-09	5.68899e-08	5.08596e-05	Significant
X8469.41	IGFBP-2	IGFBP2	0.0117853	0.00202294	7.43868e-09	5.84206e-08	5.22865e-05	Significant
X24651.1	RTN1	RTN1	0.00833304	0.00143096	7.55748e-09	5.92874e-08	5.31215e-05	Significant
X3221.54	SARP-2	SFRP1	0.0505097	0.00868248	7.79189e-09	6.10582e-08	5.47692e-05	Significant
X24459.15	COPB2	COPB2	-0.0212769	0.00365744	7.80578e-09	6.10989e-08	5.48668e-05	Significant
X3427.63	CSK21	CSNK2A1	-0.00834995	0.00143834	8.35736e-09	6.53436e-08	5.87439e-05	Significant
X11516.7	FABPL	FABP1	-0.00975698	0.00168052	8.36895e-09	6.53615e-08	5.88254e-05	Significant
X9830.109	VAV3	VAV3	-0.00513317	0.00088447	8.45239e-09	6.59399e-08	5.94118e-05	Significant
X9305.89	INGR2:ECD	IFNGR2	0.00929036	0.00160653	9.52124e-09	7.4196e-08	6.69248e-05	Significant
X11638.42	B3GT2	B3GALT2	0.0155588	0.00269291	9.8506e-09	7.66776e-08	6.92398e-05	Significant
X22858.3	MK06	MAPK6	-0.035787	0.0061995	1.01035e-08	7.85591e-08	7.10174e-05	Significant
X19586.89	RAB3C	RAB3C	-0.00894903	0.00155063	1.01782e-08	7.90522e-08	7.15423e-05	Significant
X4562.1	NXPH1	NXPH1	0.0300998	0.00522008	1.05654e-08	8.19694e-08	7.42642e-05	Significant
X15299.102	MESD2	MESD	0.0245807	0.00426591	1.07127e-08	8.30208e-08	7.52999e-05	Significant
X4962.52	ARMEL	CDNF	0.0208632	0.00362216	1.08738e-08	8.41758e-08	7.64316e-05	Significant
X23030.4	Siglec-5	SIGLEC5	0.053705	0.0093229	1.08967e-08	8.4261e-08	7.65932e-05	Significant
X23037.37	UB2D3	UBE2D3	0.0260732	0.00452817	1.09835e-08	8.48382e-08	7.72028e-05	Significant
X15610.72	LAP	LAP3	0.028187	0.00489456	1.12208e-08	8.65762e-08	7.88709e-05	Significant
X18220.141	SRA1	SRA1	0.00894552	0.00155341	1.14613e-08	8.83351e-08	8.05616e-05	Significant
X14148.2	UCRP	ISG15	0.0150295	0.00261378	1.15226e-08	8.87104e-08	8.09926e-05	Significant
X24414.3	Glycogen phosphorylase	PYGB	-0.0481109	0.0083687	1.15916e-08	8.91439e-08	8.14775e-05	Significant
X9758.17	RS4X	RPS4X	-0.00906679	0.00157734	1.16292e-08	8.92381e-08	8.17416e-05	Significant
X17804.102	PNPO	PNPO	0.00894955	0.0015567	1.16293e-08	8.92381e-08	8.17421e-05	Significant
X7110.2	DJB11	DNAJB11	0.0271778	0.00473026	1.1788e-08	9.03579e-08	8.28582e-05	Significant
X16922.53	PLXB3	PLXNB3	0.0357772	0.00622394	1.18035e-08	9.03781e-08	8.29671e-05	Significant
X21221.67	Serpin B9	SERPINB9	0.038287	0.00667568	1.24978e-08	9.559e-08	8.78472e-05	Significant
X23617.15	HYPK	HYPK	-0.00843443	0.00147324	1.3288e-08	1.01523e-07	9.3401e-05	Significant
X22041.26	MP2K5	MAP2K5	-0.010136	0.00177041	1.33731e-08	1.02062e-07	9.39994e-05	Significant
X10938.13	sLFA-3	CD58	0.0188464	0.00329476	1.36496e-08	1.04059e-07	9.59429e-05	Significant
X5483.1	RGMA	RGMA	0.0166605	0.00291434	1.3898e-08	1.05827e-07	9.76892e-05	Significant
X24671.15	ASC	PYCARD	0.0221949	0.00388248	1.39115e-08	1.05827e-07	9.77838e-05	Significant
X25094.9	ACSA	ACSS2	-0.00607385	0.00106413	1.46424e-08	1.11266e-07	0.000102921	Significant
X5509.7	EGF:ECD	EGF	0.0314991	0.00554421	1.70173e-08	1.29174e-07	0.000119615	Significant
X6375.75	XXLT1	XXYLT1	0.0351858	0.00619509	1.71712e-08	1.30201e-07	0.000120696	Significant
X23296.29	SARP-3	SFRP5	0.0648987	0.011433	1.7502e-08	1.32566e-07	0.000123021	Significant
X14093.10	Flt3 ligand	FLT3LG	0.00894504	0.00157581	1.75552e-08	1.32826e-07	0.000123395	Significant
X13653.335	MACD1	MACROD1	-0.00634812	0.00111879	1.77481e-08	1.34141e-07	0.000124751	Significant
X18166.4	RHOB	RHOB	0.00739627	0.00130379	1.79327e-08	1.35391e-07	0.000126049	Significant
X14186.13	RFFL	RFFL	0.0149852	0.00264393	1.84141e-08	1.38877e-07	0.000129433	Significant
X11348.132	P4HA2	P4HA2	0.00978883	0.00172664	1.85112e-08	1.39459e-07	0.000130115	Significant
X12754.14	CSDC2	CSDC2	0.00652018	0.00115075	1.85841e-08	1.39858e-07	0.000130627	Significant
X9751.72	NSEP1	YBX1	-0.0116254	0.00205409	1.92529e-08	1.44736e-07	0.000135329	Significant
X19126.4	C20orf77	RPRD1B	-0.00811902	0.00143499	1.94237e-08	1.45865e-07	0.000136529	Significant
X8476.11	CgA	CHGA	0.0668067	0.0118265	2.04342e-08	1.53289e-07	0.000143632	Significant
X23364.3	UCK1	UCK1	-0.00907266	0.00160659	2.06598e-08	1.54816e-07	0.000145218	Significant
X12477.42	TSN	TSN	0.0112921	0.00200216	2.15935e-08	1.61641e-07	0.000151781	Significant
X19215.7	NDRG1	NDRG1	0.00922266	0.00163701	2.23871e-08	1.67403e-07	0.000157359	Significant
X6649.51	NET1	NTN1	0.0220369	0.0039164	2.32629e-08	1.73585e-07	0.000163515	Significant
X19291.2	CASQ2	CASQ2	0.0130885	0.0023256	2.32632e-08	1.73585e-07	0.000163517	Significant
X11117.2	SPT20	SPATA20	0.00744422	0.00132387	2.37523e-08	1.77046e-07	0.000166955	Significant
X24417.22	RABE1	RABEP1	-0.00764132	0.00136241	2.56755e-08	1.91179e-07	0.000180473	Significant
X6556.5	ENPP5	ENPP5	0.0361806	0.00645294	2.60136e-08	1.93491e-07	0.000182849	Significant
X17737.7	IVD	IVD	-0.0115861	0.00206676	2.60419e-08	1.93498e-07	0.000183049	Significant
X22547.17	RBMS1	RBMS1	-0.00699452	0.0012485	2.66139e-08	1.97539e-07	0.000187069	Significant
X21478.20	SMAD5	SMAD5	0.0131361	0.00234481	2.66754e-08	1.97787e-07	0.000187502	Significant
X22992.6	MARE3	MAPRE3	0.00652348	0.00116377	2.68047e-08	1.98536e-07	0.00018841	Significant
X3676.15	IGF-II receptor	IGF2R	0.0236686	0.004229	2.74247e-08	2.02914e-07	0.000192768	Significant
X7173.141	T132C:ECD	TMEM132C	0.0294984	0.00527352	2.79056e-08	2.06255e-07	0.000196149	Significant
X11833.83	FRDA	FXN	0.00422897	0.000756089	2.79785e-08	2.06577e-07	0.000196661	Significant
X19282.3	RAB13	RAB13	0.0269704	0.00482448	2.89032e-08	2.1318e-07	0.00020316	Significant
X6572.10	LRRT4:ECD	LRRTM4	0.00544328	0.000974323	2.91538e-08	2.14803e-07	0.000204922	Significant
X9296.15	PTPRD	PTPRD	0.0292514	0.00524714	3.10211e-08	2.28321e-07	0.000218047	Significant
X10749.18	HSP 70	HSPA1A	0.0349891	0.00627751	3.12038e-08	2.29427e-07	0.000219332	Significant
X17748.21	QORX	TP53I3	0.0304876	0.0054764	3.24195e-08	2.38116e-07	0.000227877	Significant
X18821.9	C4a	C4A|C4B	0.0132498	0.00237998	3.25423e-08	2.38768e-07	0.00022874	Significant
X9846.32	Rho-GDI beta	ARHGDIB	0.0269171	0.00483768	3.29303e-08	2.41254e-07	0.000231467	Significant
X22783.40	SPI1	SPI1	-0.00837421	0.00150494	3.29498e-08	2.41254e-07	0.000231604	Significant
X24891.54	ES8L2	EPS8L2	0.0123557	0.00222078	3.30698e-08	2.41881e-07	0.000232448	Significant
X5018.68	Peroxiredoxin-6	PRDX6	0.0356098	0.00640207	3.33027e-08	2.43331e-07	0.000234085	Significant
X8220.15	CJ035	FAM241B	0.0258533	0.00464908	3.3546e-08	2.44855e-07	0.000235795	Significant
X9275.2	Siglec-5	SIGLEC5	0.0598142	0.0107554	3.36862e-08	2.45623e-07	0.00023678	Significant
X20398.60	POP7	POP7	-0.016099	0.00289834	3.48739e-08	2.5402e-07	0.000245129	Significant
X14341.8	FA69C	DIPK1C	-0.0105202	0.00189548	3.5731e-08	2.59993e-07	0.000251153	Significant
X4480.59	C3b	C3	0.137452	0.0247762	3.62171e-08	2.63257e-07	0.00025457	Significant
X22119.18	CSN8	COPS8	-0.0155825	0.00280972	3.64668e-08	2.64799e-07	0.000256325	Significant
X9242.11	BTC	BTC	0.0246934	0.00445783	3.77892e-08	2.74118e-07	0.00026562	Significant
X19272.9	PEF1	PEF1	0.0245235	0.00443004	3.86496e-08	2.8007e-07	0.000271668	Significant
X17698.15	WBP2	WBP2	0.0142431	0.00257504	3.97692e-08	2.87887e-07	0.000279538	Significant
X13492.44	HSPA9B	HSPA9	0.0123039	0.00222557	4.01834e-08	2.90586e-07	0.000282449	Significant
X18182.24	PCKGC	PCK1	-0.00811083	0.00146783	4.08071e-08	2.94793e-07	0.000286833	Significant
X12724.81	CIRBP	CIRBP	0.0216037	0.00391196	4.1599e-08	3.00205e-07	0.000292399	Significant
X15607.56	KPYR	PKLR	-0.00958436	0.00173548	4.17643e-08	3.01088e-07	0.000293561	Significant
X3898.5	PSD7	PSMD7	-0.00774009	0.00140414	4.39199e-08	3.16304e-07	0.000308713	Significant
X2968.61	TNFSF15	TNFSF15	0.0218581	0.00396686	4.44342e-08	3.19681e-07	0.000312328	Significant
X8587.21	ISK52	SPINK14	0.00495425	0.000899691	4.53465e-08	3.25911e-07	0.000318741	Significant
X22788.10	ST6B1	SULT6B1	-0.00705618	0.00128317	4.73877e-08	3.40233e-07	0.000333088	Significant
X8660.5	OLFL3	OLFML3	0.0258953	0.00471503	4.90807e-08	3.52029e-07	0.000344989	Significant
X5090.49	ILT-2	LILRB1	0.0483864	0.00880948	4.92553e-08	3.52921e-07	0.000346216	Significant
X12627.97	ATG7	ATG7	-0.012957	0.00236103	5.02809e-08	3.59903e-07	0.000353425	Significant
X13122.19	FLRT2	FLRT2	0.0214754	0.00391424	5.06187e-08	3.61952e-07	0.000355799	Significant
X19568.17	IL-15	IL15	0.00759072	0.00138478	5.22166e-08	3.72827e-07	0.00036703	Significant
X8905.20	KCMB3	KCNMB3	0.0156304	0.0028516	5.22457e-08	3.72827e-07	0.000367235	Significant
X24926.9	FUBP2	KHSRP	0.0116957	0.00213805	5.56469e-08	3.96696e-07	0.000391142	Significant
X14633.26	T185A	TMEM185A	-0.00811832	0.00148507	5.6547e-08	4.02441e-07	0.000397469	Significant
X25298.53	KDM4C	KDM4C	-0.00749225	0.00137041	5.65674e-08	4.02441e-07	0.000397612	Significant
X10080.9	EI2BA	EIF2B1	-0.00843424	0.00154443	5.84518e-08	4.15427e-07	0.000410858	Significant
X24713.4	MAGIX	MAGIX	0.00494265	0.00090547	5.91227e-08	4.19771e-07	0.000415574	Significant
X5846.24	Noggin	NOG	0.0230841	0.0042296	5.9366e-08	4.20887e-07	0.000417284	Significant
X12508.9	CHMP3	CHMP3	0.00631141	0.00115639	5.93996e-08	4.20887e-07	0.00041752	Significant
X11310.8	Desmoglein-3	DSG3	-0.00774021	0.00141839	5.95416e-08	4.21468e-07	0.000418518	Significant
X15453.3	a1-Microglobulin	AMBP	-0.0348333	0.00638421	5.98511e-08	4.23233e-07	0.000420693	Significant
X3347.9	BARK1	GRK2	-0.00967779	0.00177404	6.01992e-08	4.25267e-07	0.00042314	Significant
X21583.14	RL26L	RPL26L1	-0.0180162	0.00330487	6.14582e-08	4.33725e-07	0.00043199	Significant
X3799.11	Carbonic anhydrase III	CA3	-0.118629	0.0217614	6.15341e-08	4.33824e-07	0.000432523	Significant
X13568.30	PSMD4	PSMD4	-0.00973983	0.00178688	6.17366e-08	4.34816e-07	0.000433947	Significant
X5078.82	EphB6	EPHB6	0.0380222	0.00697887	6.25012e-08	4.39761e-07	0.000439321	Significant
X22817.126	TRIM9	TRIM9	0.00882033	0.00161999	6.37913e-08	4.48389e-07	0.000448389	Significant
X20935.4	PDCL3	PDCL3	0.0116756	0.00214634	6.57071e-08	4.61394e-07	0.000461855	Significant
X5728.60	FCRL1	FCRL1	-0.00905398	0.00166463	6.60057e-08	4.63028e-07	0.000463954	Significant
X12764.3	ELMO1	ELMO1	-0.0129409	0.00237984	6.65666e-08	4.66497e-07	0.000467897	Significant
X23282.19	RAB37	RAB37	-0.00708057	0.00130241	6.66478e-08	4.66601e-07	0.000468467	Significant
X23584.2	NUD15	NUDT15	-0.0128425	0.00236264	6.73828e-08	4.71277e-07	0.000473634	Significant
X13993.20	E41L1	EPB41L1	-0.0091387	0.00168221	6.83931e-08	4.77868e-07	0.000480735	Significant
X8248.222	SIG14	SIGLEC14	0.0627028	0.0115572	7.11975e-08	4.9652e-07	0.000500447	Significant
X10981.56	NRG3	NRG3	0.0326281	0.00601521	7.12039e-08	4.9652e-07	0.000500492	Significant
X24981.8	DC1L1	DYNC1LI1	0.00715658	0.00131949	7.16571e-08	4.99185e-07	0.000503678	Significant
X23031.6	SIRT2	SIRT2	0.00886682	0.00163615	7.34876e-08	5.1143e-07	0.000516545	Significant
X17366.6	DCNL1	DCUN1D1	0.0624589	0.0115417	7.62609e-08	5.30205e-07	0.000536038	Significant
X20074.3	LAMA3	LAMA3	0.00701314	0.00129647	7.72644e-08	5.36445e-07	0.000543092	Significant
X7975.97	UNC5A	UNC5A	0.0354269	0.00654929	7.7311e-08	5.36445e-07	0.000543419	Significant
X3294.55	CFC1	CFC1	0.0197254	0.00365642	8.361e-08	5.7958e-07	0.000587694	Significant
X2841.13	sFRP-3	FRZB	0.040227	0.0074603	8.48488e-08	5.87589e-07	0.000596402	Significant
X9840.2	Cdc42Hs	CDC42	-0.0297454	0.0055169	8.51338e-08	5.88981e-07	0.000598405	Significant
X16792.4	Siglec-5	SIGLEC5	0.0594052	0.0110176	8.54304e-08	5.90453e-07	0.000600491	Significant
X10562.42	NETO2	NETO2	0.028702	0.0053339	9.00116e-08	6.21202e-07	0.000632692	Significant
X9569.14	SCAR3:region 1	SCARA3	0.00810871	0.00150682	9.00561e-08	6.21202e-07	0.000633005	Significant
X18299.13	CPNS1	CAPNS1	0.0324292	0.0060279	9.06775e-08	6.24875e-07	0.000637372	Significant
X3132.1	VEGF-C	VEGFC	-0.00987958	0.00183847	9.3782e-08	6.45635e-07	0.000659193	Significant
X12799.65	DJC27	DNAJC27	0.0042803	0.000796576	9.40942e-08	6.47151e-07	0.000661388	Significant
X5918.5	PSME1	PSME1	-0.0173336	0.00323528	1.0235e-07	7.03242e-07	0.000719417	Significant
X25951.17	PRAME	PRAME	0.0147507	0.00275473	1.03831e-07	7.12722e-07	0.000729827	Significant
X24937.7	RHG26	ARHGAP26	-0.00838608	0.00156614	1.04138e-07	7.14136e-07	0.000731989	Significant
X18817.50	CBX1	CBX1	0.0103588	0.00193588	1.06111e-07	7.26953e-07	0.000745854	Significant
X19574.5	gpIIbIIIa	ITGA2B|ITGB3	-0.00760961	0.00142247	1.0709e-07	7.32945e-07	0.000752735	Significant
X18312.68	NDRG3	NDRG3	0.0341181	0.00637883	1.07286e-07	7.33574e-07	0.000754114	Significant
X8997.4	NPTXR	NPTXR	-0.0166651	0.00311642	1.07961e-07	7.3747e-07	0.000758857	Significant
X5903.91	HSP70 protein 8	HSPA8	0.0193405	0.00361787	1.09074e-07	7.44348e-07	0.000766678	Significant
X3210.1	METAP1	METAP1	-0.00824734	0.00154295	1.09293e-07	7.45123e-07	0.000768222	Significant
X5012.67	Myokinase, human	AK1	0.0319654	0.0059819	1.10492e-07	7.52568e-07	0.00077665	Significant
X9790.28	BR serine/threonine kinase 2	BRSK2	0.0259619	0.00486143	1.12113e-07	7.62868e-07	0.000788042	Significant
X13436.54	MAZ	MAZ	0.00814115	0.00152451	1.12384e-07	7.63961e-07	0.000789949	Significant
X12387.7	PDLI4	PDLIM4	0.0261073	0.00488863	1.12577e-07	7.63961e-07	0.000791302	Significant
X22954.10	CLIC2	CLIC2	-0.0213611	0.00400012	1.1263e-07	7.63961e-07	0.000791676	Significant
X11083.23	NSE	ENO2	0.145462	0.0272298	1.12708e-07	7.63961e-07	0.000792227	Significant
X18307.71	PPase 2	PPA2	0.0172643	0.00323469	1.14469e-07	7.75148e-07	0.000804603	Significant
X24723.58	eIF-2-beta	EIF2S2	-0.00682967	0.00128002	1.15182e-07	7.79227e-07	0.000809617	Significant
X12939.1	RPAC1	POLR1C	-0.00903466	0.00169355	1.15641e-07	7.8158e-07	0.000812843	Significant
X22587.37	EPHA6	EPHA6	0.0283643	0.00531953	1.17219e-07	7.91484e-07	0.000823935	Significant
X19488.1	PDCD6	PDCD6	0.0130914	0.0024566	1.19426e-07	8.05609e-07	0.000839444	Significant
X11288.26	5NTC	NT5C2	-0.00532753	0.00100032	1.21347e-07	8.17783e-07	0.000852947	Significant
X10910.6	CEAM4	CEACAM4	-0.00734811	0.00137989	1.21988e-07	8.21317e-07	0.000857455	Significant
X20941.7	UBL3	UBL3	0.0314687	0.00591193	1.23289e-07	8.29284e-07	0.000866602	Significant
X8398.277	RAR-responsive protein TIG1	RARRES1	-0.0415434	0.00781048	1.26543e-07	8.50355e-07	0.000889472	Significant
X9595.11	B4GT2	B4GALT2	0.040589	0.00763778	1.29029e-07	8.6623e-07	0.000906943	Significant
X2681.23	HGF	HGF	0.0288012	0.00542556	1.33277e-07	8.93899e-07	0.000936806	Significant
X18842.24	UB2D2	UBE2D2	0.0185182	0.00348906	1.33877e-07	8.97068e-07	0.000941025	Significant
X19222.124	RAB5B	RAB5B	-0.0249324	0.00469789	1.34313e-07	8.98816e-07	0.000944089	Significant
X23289.25	NGN1	NEUROG1	0.00880397	0.00165889	1.34394e-07	8.98816e-07	0.000944655	Significant
X14097.86	ST4S6	CHST15	0.0371186	0.00700113	1.37914e-07	9.21226e-07	0.000969397	Significant
X9509.4	TM38B	TMEM38B	0.0149704	0.00282364	1.38007e-07	9.21226e-07	0.000970051	Significant
X17454.15	EGFL6	EGFL6	0.00472473	0.000891543	1.39911e-07	9.33052e-07	0.000983437	Significant
X8866.53	QPCTL	QPCTL	0.0334375	0.00631083	1.40614e-07	9.36851e-07	0.000988378	Significant
X11383.41	Keratin 7	KRT7	-0.00861999	0.0016267	1.4089e-07	9.37802e-07	0.000990319	Significant
X13620.10	ASNA	GET3	-0.0105086	0.00198361	1.4124e-07	9.39238e-07	0.000992775	Significant
X3795.6	ADAM 9	ADAM9	0.0243916	0.0046058	1.42446e-07	9.46364e-07	0.00100125	Significant
X15313.28	MD2L1	MAD2L1	0.00579121	0.00109402	1.44628e-07	9.59955e-07	0.00101659	Significant
X11643.73	DTX3L	DTX3L	-0.00722336	0.0013658	1.47978e-07	9.81263e-07	0.00104014	Significant
X20939.113	NHP2	NHP2	-0.00725123	0.00137184	1.50507e-07	9.9709e-07	0.00105791	Significant
X13636.20	NP1L1	NAP1L1	-0.0108316	0.00205002	1.52569e-07	1.0098e-06	0.00107241	Significant
X12750.9	LFA-1 beta-2	ITGB2	0.00876726	0.00166008	1.54168e-07	1.01942e-06	0.00108365	Significant
X11142.11	ANGL1:C-term	ANGPTL1	0.0245823	0.00465674	1.55899e-07	1.0299e-06	0.00109581	Significant
X7146.16	PDIA4	PDIA4	0.00353818	0.000670363	1.56924e-07	1.0357e-06	0.00110302	Significant
X11103.24	HSP 27	HSPB1	-0.00960544	0.0018202	1.57843e-07	1.04078e-06	0.00110948	Significant
X21891.31	FBLN7	FBLN7	0.0277646	0.0052628	1.58667e-07	1.04524e-06	0.00111527	Significant
X5005.4	MK12	MAPK12	0.00548292	0.00103937	1.59965e-07	1.05235e-06	0.0011244	Significant
X11431.235	RECQ1	RECQL	-0.0243696	0.00462077	1.60046e-07	1.05235e-06	0.00112497	Significant
X22488.17	KLF9	KLF9	0.00957909	0.00181778	1.64123e-07	1.07815e-06	0.00115362	Significant
X11277.23	ATF6A	ATF6	0.0279797	0.00531275	1.66485e-07	1.09193e-06	0.00117023	Significant
X7853.19	SCO1	SCO1	-0.0069245	0.00131484	1.66531e-07	1.09193e-06	0.00117055	Significant
X17364.8	RU2B	SNRPB2	-0.00965007	0.00183257	1.6722e-07	1.09542e-06	0.00117539	Significant
X21577.35	FKBP5	FKBP5	-0.00699672	0.00132949	1.70204e-07	1.11393e-06	0.00119637	Significant
X12593.33	PDRG1	PDRG1	-0.00515942	0.000980549	1.70984e-07	1.118e-06	0.00120185	Significant
X17782.23	THIK	ACAA1	0.0113268	0.002152	1.72871e-07	1.12929e-06	0.00121511	Significant
X13673.21	TCPH	CCT7	-0.0147711	0.00280872	1.74472e-07	1.13869e-06	0.00122637	Significant
X9223.11	ARMET	MANF	0.0202681	0.00385689	1.77014e-07	1.1542e-06	0.00124423	Significant
X13119.26	protein Z inhibitor	SERPINA10	-0.0121314	0.00230833	1.77238e-07	1.15459e-06	0.00124581	Significant
X9202.309	ATPO	ATP5PO	-0.00980144	0.00186581	1.78787e-07	1.16361e-06	0.0012567	Significant
X4469.78	ST4S6	CHST15	0.0365344	0.00695648	1.79909e-07	1.16982e-06	0.00126458	Significant
X9366.54	IL-21 sR	IL21R	-0.00699364	0.00133371	1.88182e-07	1.22248e-06	0.00132273	Significant
X21001.393	BRK1	BRK1	-0.00507366	0.000967934	1.90156e-07	1.23417e-06	0.00133661	Significant
X20386.15	PTRD1	PTRHD1	-0.0254838	0.00486237	1.91713e-07	1.24313e-06	0.00134755	Significant
X13566.2	SSU72	SSU72	-0.00901686	0.001721	1.92712e-07	1.24846e-06	0.00135458	Significant
X11313.100	PHS	PCBD1	0.0187144	0.00357306	1.9422e-07	1.25706e-06	0.00136517	Significant
X23246.67	BL1S1	BLOC1S1	0.00681506	0.00130341	2.03611e-07	1.31663e-06	0.00143118	Significant
X17738.7	CRNN	CRNN	0.00508726	0.000973255	2.06258e-07	1.33252e-06	0.00144978	Significant
X8778.3	Noggin	NOG	0.014081	0.00269541	2.08461e-07	1.34552e-06	0.00146527	Significant
X5748.20	Acid ceramidase	ASAH1	-0.00657739	0.0012604	2.14732e-07	1.38472e-06	0.00150935	Significant
X18841.1	SPB13	SERPINB13	-0.0107882	0.00206959	2.2278e-07	1.43531e-06	0.00156592	Significant
X23375.4	RFPL3	RFPL3	-0.0108189	0.00207716	2.26409e-07	1.45735e-06	0.00159143	Significant
X7980.72	B3GN2	B3GNT2	0.0311548	0.00598197	2.26637e-07	1.45748e-06	0.00159303	Significant
X5125.6	SIG14	SIGLEC14	0.0261441	0.00501956	2.27869e-07	1.46407e-06	0.00160169	Significant
X23411.108	PNMA2	PNMA2	-0.0439169	0.00843529	2.28856e-07	1.46907e-06	0.00160863	Significant
X4719.58	Protein disulfide isomerase A3	PDIA3	0.0195996	0.0037645	2.29121e-07	1.46943e-06	0.00161049	Significant
X7175.4	PCDG2	PCDHGA2	-0.00691031	0.00132743	2.29595e-07	1.47112e-06	0.00161382	Significant
X18411.83	ARL15	ARL15	0.0214117	0.00411303	2.30721e-07	1.477e-06	0.00162174	Significant
X19578.19	DOK2	DOK2	-0.00757994	0.00145639	2.30961e-07	1.47718e-06	0.00162343	Significant
X13073.14	AN32A	ANP32A	-0.00658774	0.00126856	2.45664e-07	1.56843e-06	0.00172677	Significant
X13083.18	SYVC	VARS1	-0.00724342	0.00139484	2.45673e-07	1.56843e-06	0.00172684	Significant
X8064.125	Poliovirus receptor	PVR	-0.00716198	0.00137939	2.4689e-07	1.57477e-06	0.00173539	Significant
X19332.1	MOBL3	MOB4	-0.0202285	0.0038962	2.47381e-07	1.57646e-06	0.00173884	Significant
X17692.2	BT3A3	BTN3A3	0.0123833	0.00238584	2.49385e-07	1.5878e-06	0.00175293	Significant
X9805.51	SEM4B	SEMA4B	0.00821708	0.0015838	2.52885e-07	1.60863e-06	0.00177753	Significant
X21236.12	TMED9	TMED9	0.0277668	0.00535335	2.53479e-07	1.61094e-06	0.0017817	Significant
X7244.16	TM149	IGFLR1	0.0388087	0.00749256	2.63515e-07	1.67321e-06	0.00185224	Significant
X21135.16	SF3B6	SF3B6	-0.00593567	0.00114612	2.64318e-07	1.6768e-06	0.00185789	Significant
X25033.194	TER ATPase	VCP	-0.0104931	0.00202629	2.64918e-07	1.67909e-06	0.00186211	Significant
X6334.9	GGT2	GGT2	0.0234504	0.00453119	2.6974e-07	1.70811e-06	0.001896	Significant
X6036.78	EPHAA	EPHA10	0.0114403	0.00221114	2.71873e-07	1.72007e-06	0.00191099	Significant
X14603.51	KIAA0040	KIAA0040	0.00977193	0.00189088	2.80715e-07	1.77441e-06	0.00197314	Significant
X12438.127	3MG	MPG	-0.00686323	0.00132827	2.81418e-07	1.77725e-06	0.00197808	Significant
X3340.53	TSP4	THBS4	0.0286968	0.00555629	2.84584e-07	1.79564e-06	0.00200034	Significant
X3290.50	CD109	CD109	0.027887	0.00540235	2.89034e-07	1.82208e-06	0.00203162	Significant
X3195.50	Granulysin	GNLY	0.0681787	0.0132095	2.9008e-07	1.82703e-06	0.00203897	Significant
X5957.30	Somatostatin-28	SST	0.0414291	0.00802947	2.92236e-07	1.83897e-06	0.00205413	Significant
X14102.6	Granulysin	GNLY	0.0772731	0.0149789	2.93752e-07	1.84559e-06	0.00206478	Significant
X17802.4	SIAS	NANS	-0.0462438	0.00896367	2.93813e-07	1.84559e-06	0.00206521	Significant
X11395.5	FAK2:FERM	PTK2B	-0.00618995	0.00120118	3.02468e-07	1.89826e-06	0.00212605	Significant
X12758.47	GRID2	GRID2	0.00630354	0.00122392	3.07321e-07	1.92699e-06	0.00216016	Significant
X4978.54	DBNL	DBNL	0.0221622	0.00430715	3.15087e-07	1.97393e-06	0.00221475	Significant
X21813.171	MGT5A	MGAT5	0.0271175	0.00527704	3.2567e-07	2.03841e-06	0.00228913	Significant
X5226.36	CK2-A2:B	CSNK2A2|CSNK2B	-0.0088387	0.00172054	3.28945e-07	2.05708e-06	0.00231216	Significant
X8327.26	DPEP2	DPEP2	0.0294008	0.00572583	3.32908e-07	2.08001e-06	0.00234001	Significant
X3362.61	CRDL1	CHRDL1	0.0443887	0.0086452	3.3325e-07	2.0803e-06	0.00234241	Significant
X18375.28	IL-1F5	IL36RN	-0.00849823	0.00165521	3.34496e-07	2.08622e-06	0.00235117	Significant
X22946.55	Alpha-1-syntrophin	SNTA1	0.00687314	0.00133931	3.38703e-07	2.11059e-06	0.00238075	Significant
X14614.41	CA130	NCMAP	0.0380915	0.00743127	3.49521e-07	2.17607e-06	0.00245679	Significant
X23545.6	NDEL1	NDEL1	-0.00624168	0.001218	3.51974e-07	2.1894e-06	0.00247402	Significant
X2573.20	IL-6	IL6	-0.0104029	0.00203087	3.55251e-07	2.20784e-06	0.00249706	Significant
X5006.71	MK13	MAPK13	-0.00705686	0.00137786	3.56251e-07	2.21209e-06	0.00250409	Significant
X11487.4	Testican-1	SPOCK1	0.0244096	0.00476872	3.61504e-07	2.24273e-06	0.00254101	Significant
X3592.4	CAMK1	CAMK1	0.015441	0.00301796	3.66545e-07	2.272e-06	0.00257645	Significant
X24948.79	PSPC1	PSPC1	-0.00714964	0.00139809	3.71223e-07	2.29896e-06	0.00260932	Significant
X21763.46	UBP4	USP4	-0.00928487	0.00181328	3.72538e-07	2.30508e-06	0.00261857	Significant
X24217.2	Calgranulin A	S100A8	-0.00845308	0.00165544	3.86678e-07	2.39047e-06	0.00271796	Significant
X5723.4	INSL3	INSL3	-0.00758474	0.00148675	3.95522e-07	2.44299e-06	0.00278013	Significant
X13130.150	HXK2	HK2	-0.00882061	0.00172909	3.9593e-07	2.44336e-06	0.00278299	Significant
X9028.5	PAPD1	MTPAP	0.00322643	0.000632628	4.00194e-07	2.46751e-06	0.00281296	Significant
X20388.8	TSR2	TSR2	0.0132736	0.00260548	4.10236e-07	2.52721e-06	0.00288355	Significant
X9401.57	CB089	TRABD2A	0.0162001	0.00318013	4.11216e-07	2.53103e-06	0.00289044	Significant
X2948.58	Growth hormone receptor	GHR	-0.03789	0.0074397	4.13553e-07	2.54319e-06	0.00290687	Significant
X9456.34	IL-22BP	IL22RA2	0.00406011	0.000797475	4.17443e-07	2.56487e-06	0.00293421	Significant
X25907.47	EMAL2	EML2	-0.00544941	0.00107091	4.22584e-07	2.59418e-06	0.00297034	Significant
X21504.41	I2C2	AGO2	-0.0245728	0.00483217	4.32672e-07	2.6538e-06	0.00304125	Significant
X24706.73	CFDP1	CFDP1	-0.00683392	0.00134492	4.38696e-07	2.6884e-06	0.0030836	Significant
X10940.25	SRCA	SRL	-0.0062088	0.00122275	4.47145e-07	2.73779e-06	0.00314298	Significant
X24432.3	GRAP1	GRIPAP1	-0.00725859	0.00142993	4.50676e-07	2.757e-06	0.0031678	Significant
X6918.183	CCKN	CCK	0.0701856	0.0138281	4.51554e-07	2.75998e-06	0.00317398	Significant
X12845.18	SNX17	SNX17	-0.00807037	0.00159045	4.56544e-07	2.7861e-06	0.00320905	Significant
X3317.33	HTRA2	HTRA2	0.0256725	0.00506017	4.56621e-07	2.7861e-06	0.00320959	Significant
X17832.12	IDI2	IDI2	-0.00792075	0.00156178	4.63606e-07	2.82627e-06	0.00325869	Significant
X12333.87	RPIA	RPIA	-0.00945863	0.00186523	4.64628e-07	2.83004e-06	0.00326587	Significant
X18191.23	RANG	RANBP1	-0.00623597	0.00123	4.65793e-07	2.83469e-06	0.00327406	Significant
X4282.3	RAN	RAN	-0.0534116	0.0105344	4.69717e-07	2.85609e-06	0.00330164	Significant
X6172.7	PolyUbiquitin K63	UBC	0.0187542	0.00370348	4.79478e-07	2.91292e-06	0.00337025	Significant
X9815.5	RHG01:CRAL-TRIO	ARHGAP1	0.0214913	0.00424444	4.81488e-07	2.9226e-06	0.00338438	Significant
X10445.20	ApoM	APOM	-0.0314981	0.00622186	4.84805e-07	2.9402e-06	0.00340769	Significant
X4246.40	NCAM-L1	L1CAM	0.0308466	0.00609746	4.91999e-07	2.98126e-06	0.00345826	Significant
X22142.4	F86B1	FAM86B1	0.00631248	0.00124892	5.04616e-07	3.05508e-06	0.00354694	Significant
X8396.42	FAAH2	FAAH2	0.0063973	0.00126613	5.10439e-07	3.08767e-06	0.00358788	Significant
X9065.28	TXLNA	TXLNA	-0.00681842	0.00134999	5.13902e-07	3.10595e-06	0.00361222	Significant
X7831.39	RBP	RBP4	-0.0180586	0.00357576	5.14598e-07	3.10748e-06	0.00361711	Significant
X12697.30	PI42A	PIP4K2A	-0.0123038	0.00243688	5.19551e-07	3.1347e-06	0.00365192	Significant
X19797.4	GCNL2	KAT2A	-0.0140134	0.00277707	5.27386e-07	3.17924e-06	0.003707	Significant
X21743.1	WDR48	WDR48	0.0141555	0.00280629	5.31559e-07	3.20165e-06	0.00373633	Significant
X12498.12	TX1B3	TAX1BP3	0.0096243	0.00190837	5.33927e-07	3.21316e-06	0.00375297	Significant
X12513.8	GLTP	GLTP	0.00577268	0.00114494	5.37404e-07	3.23132e-06	0.00377742	Significant
X19271.64	GNAI1	GNAI1	0.00883877	0.00175352	5.41388e-07	3.25249e-06	0.00380542	Significant
X13572.43	PSD11	PSMD11	-0.00989666	0.00196352	5.42595e-07	3.25696e-06	0.0038139	Significant
X11096.57	HEMK2	N6AMT1	0.0190959	0.00378877	5.43567e-07	3.26001e-06	0.00382073	Significant
X18327.6	SNX5	SNX5	-0.00635193	0.00126121	5.52921e-07	3.31328e-06	0.00388648	Significant
X7012.35	VNN2	VNN2	-0.00697223	0.00138485	5.57417e-07	3.33738e-06	0.00391808	Significant
X14088.38	IGFBP-6	IGFBP6	-0.00370924	0.000736885	5.6005e-07	3.35029e-06	0.00393659	Significant
X17729.20	UBE2S	UBE2S	0.00360628	0.000716573	5.63213e-07	3.36635e-06	0.00395882	Significant
X23645.49	HACL1	HACL1	-0.0135463	0.00269227	5.66121e-07	3.38085e-06	0.00397927	Significant
X9876.20	aldolase C	ALDOC	0.0195652	0.00388938	5.69544e-07	3.39841e-06	0.00400333	Significant
X21345.93	RDH12	RDH12	0.0158603	0.00315328	5.72246e-07	3.40884e-06	0.00402232	Significant
X9543.131	COG8	COG8	0.00581179	0.00115555	5.72263e-07	3.40884e-06	0.00402243	Significant
X12448.246	NMT1	NMT1	-0.0100111	0.0019951	6.07632e-07	3.61647e-06	0.00427105	Significant
X24955.116	ZHX2	ZHX2	-0.00752764	0.00150216	6.27874e-07	3.73147e-06	0.00441333	Significant
X23224.11	RGN	RGN	0.0115019	0.00229445	6.28833e-07	3.73147e-06	0.00442007	Significant
X4911.49	Glutathione S-transferase Pi	GSTP1	0.039266	0.00783642	6.29447e-07	3.73147e-06	0.00442438	Significant
X13590.1	ORN	REXO2	0.0304599	0.00607905	6.29455e-07	3.73147e-06	0.00442444	Significant
X24940.3	IKK-beta	IKBKB	0.016632	0.00331913	6.2961e-07	3.73147e-06	0.00442553	Significant
X8255.34	MRVI1	IRAG1	0.00713572	0.00142406	6.30889e-07	3.7359e-06	0.00443452	Significant
X12940.35	AL3B1	ALDH3B1	-0.00673179	0.001344	6.35611e-07	3.7607e-06	0.00446771	Significant
X17755.5	UGDH	UGDH	-0.0115194	0.0022998	6.42219e-07	3.7966e-06	0.00451416	Significant
X22001.23	PADI2	PADI2	-0.00591277	0.00118178	6.54059e-07	3.86335e-06	0.00459738	Significant
X6961.14	IGFL3	IGFL3	-0.0076824	0.00153602	6.60365e-07	3.89732e-06	0.00464171	Significant
X5225.50	CK2-A1:B	CSNK2A1|CSNK2B	-0.0108207	0.00216513	6.72545e-07	3.96455e-06	0.00472732	Significant
X23326.10	GSTA2	GSTA2	-0.0214893	0.00429915	6.72885e-07	3.96455e-06	0.00472971	Significant
X18893.26	GPR56	ADGRG1	0.0333321	0.00667007	6.73751e-07	3.96633e-06	0.00473579	Significant
X7182.1	carboxylesterase, liver	CES1	-0.00546415	0.00109399	6.83968e-07	4.02311e-06	0.00480761	Significant
X8969.49	CD14	CD14	0.0145116	0.00290744	6.94985e-07	4.08449e-06	0.00488505	Significant
X2982.82	Galectin-4	LGALS4	-0.00698504	0.00139991	7.00701e-07	4.11464e-06	0.00492523	Significant
X21122.3	DBND2	DBNDD2	0.00793851	0.00159188	7.11558e-07	4.17491e-06	0.00500154	Significant
X9061.3	ARHGA	ARHGEF10	0.00816777	0.00163961	7.30625e-07	4.2832e-06	0.00513556	Significant
X13940.19	IP16:HIN 1	IFI16	-0.00835613	0.00167779	7.34635e-07	4.30312e-06	0.00516375	Significant
X4557.61	KIRR3	KIRREL3	0.0212157	0.00426585	7.60297e-07	4.44973e-06	0.00534413	Significant
X2969.11	ALK-1	ACVRL1	-0.00865778	0.00174159	7.69729e-07	4.50118e-06	0.00541042	Significant
X12350.86	ETS2	ETS2	0.00721089	0.00145078	7.73058e-07	4.5169e-06	0.00543383	Significant
X8060.7	NRG2	NRG2	0.019067	0.0038375	7.78817e-07	4.54429e-06	0.0054743	Significant
X12022.12	SMAD4	SMAD4	0.00945505	0.00190293	7.7904e-07	4.54429e-06	0.00547588	Significant
X5460.60	DEAD-box protein 19B	DDX19B	-0.00586899	0.00118159	7.86366e-07	4.58322e-06	0.00552736	Significant
X13427.66	MA1C1	MAN1C1	0.0295389	0.00594936	7.92816e-07	4.61489e-06	0.0055727	Significant
X2634.2	IL-2 sRg	IL2RG	-0.00717458	0.00144498	7.93113e-07	4.61489e-06	0.00557479	Significant
X25091.83	FNBP2	SRGAP2	0.00998529	0.00201238	8.0644e-07	4.68856e-06	0.00566847	Significant
X2794.60	SOD	SOD1	0.0107785	0.00217248	8.16457e-07	4.74287e-06	0.00573887	Significant
X15435.4	PNP	PNP	-0.0515473	0.0103932	8.20538e-07	4.76265e-06	0.00576756	Significant
X12030.82	Desmin	DES	-0.0100712	0.00203368	8.4686e-07	4.91137e-06	0.00595258	Significant
X18301.10	NAIF1	NAIF1	0.0291783	0.00589306	8.49808e-07	4.9244e-06	0.0059733	Significant
X12804.5	GMEB2	GMEB2	-0.00766141	0.00154781	8.56286e-07	4.95786e-06	0.00601884	Significant
X12549.33	PTGD2	HPGDS	-0.00947625	0.00191498	8.6339e-07	4.99487e-06	0.00606877	Significant
X11294.7	TMCC3:region 2	TMCC3	-0.0066711	0.00134839	8.66657e-07	5.00965e-06	0.00609173	Significant
X16809.1	NDKM	NME4	-0.00687722	0.00139023	8.69317e-07	5.0209e-06	0.00611043	Significant
X18206.18	ADH6	ADH6	-0.0631787	0.0127678	8.74976e-07	5.0482e-06	0.0061502	Significant
X25242.12	CATIP	CATIP	-0.00487739	0.000986122	8.75482e-07	5.0482e-06	0.00615376	Significant
X15323.112	AGO3	AGO3	-0.0140268	0.00283819	8.90512e-07	5.13066e-06	0.00625941	Significant
X8446.4	PACAP-27	ADCYAP1	0.0146139	0.00295733	9.04762e-07	5.20849e-06	0.00635957	Significant
X5440.26	Troponin I, skeletal, fast twitch	TNNI2	-0.00832905	0.00168632	9.07515e-07	5.22007e-06	0.00637893	Significant
X9022.49	DB132	DEFB132	-0.0100363	0.00203246	9.09949e-07	5.22979e-06	0.00639603	Significant
X12632.14	ARY1	NAT1	0.0141691	0.00287165	9.292e-07	5.33607e-06	0.00653135	Significant
X7215.18	NADH-cytochrome b5 reductase	CYB5R3	-0.00652853	0.00132439	9.51225e-07	5.45809e-06	0.00668616	Significant
X18330.7	PGM2	PGM2	0.0262255	0.00532106	9.53495e-07	5.46665e-06	0.00670212	Significant
X4232.19	IGF-I sR	IGF1R	0.0233949	0.00475516	9.94989e-07	5.6999e-06	0.00699378	Significant
X7810.20	C1QTNF5	C1QTNF5	0.0157051	0.00319373	1.00717e-06	5.76498e-06	0.0070794	Significant
X6914.15	AMGO2	AMIGO2	0.014656	0.00298215	1.02232e-06	5.84694e-06	0.00718589	Significant
X6409.57	GP116	ADGRF5	0.0116666	0.00237423	1.02938e-06	5.88253e-06	0.00723551	Significant
X13112.179	FSTL1	FSTL1	0.00870991	0.00177353	1.04025e-06	5.9398e-06	0.0073119	Significant
X9536.16	EP3A	EDDM3A	0.016775	0.00341607	1.04272e-06	5.94908e-06	0.00732927	Significant
X6899.37	PHS2	PCBD2	-0.00697482	0.00142084	1.05091e-06	5.99094e-06	0.00738683	Significant
X7917.17	CBPD	CPD	0.0114682	0.00233631	1.0525e-06	5.99513e-06	0.00739799	Significant
X23547.21	TCEA3	TCEA3	-0.00829194	0.00168948	1.05686e-06	6.01512e-06	0.00742867	Significant
X5076.53	EPHAA	EPHA10	0.0340189	0.00693194	1.05816e-06	6.01767e-06	0.00743784	Significant
X6423.66	C1QL2	C1QL2	0.0364208	0.00743225	1.09654e-06	6.23085e-06	0.00770756	Significant
X10527.22	DHX9	DHX9	-0.00895283	0.00182838	1.11764e-06	6.34563e-06	0.00785589	Significant
X18232.42	PI42B	PIP4K2B	-0.00905353	0.00184921	1.12439e-06	6.3788e-06	0.00790333	Significant
X24647.3	ABEC2	APOBEC2	-0.0268149	0.00547664	1.12738e-06	6.39061e-06	0.00792436	Significant
X19448.104	UPP1	UPP1	-0.00792151	0.00161849	1.13369e-06	6.42118e-06	0.00796869	Significant
X9964.10	MYZAP	MYZAP	0.0188558	0.00385322	1.13489e-06	6.42284e-06	0.00797717	Significant
X14332.3	RALA	RALA	0.0143029	0.00292384	1.14629e-06	6.48173e-06	0.00805728	Significant
X10624.45	ISK13	SPINK13	0.00770521	0.00157519	1.148e-06	6.48173e-06	0.00806928	Significant
X6255.74	CPXM1	CPXM1	0.045854	0.00937469	1.14807e-06	6.48173e-06	0.00806975	Significant
X13477.65	LT4R1	LTB4R	0.0149975	0.00306672	1.15495e-06	6.51537e-06	0.00811815	Significant
X13392.13	AT1B1	ATP1B1	0.0122467	0.00250715	1.18685e-06	6.68993e-06	0.00834234	Significant
X9952.57	TFAM	TFAM	-0.00933746	0.00191212	1.1938e-06	6.72374e-06	0.00839122	Significant
X20970.14	DBND1	DBNDD1	0.00529535	0.00108424	1.19527e-06	6.72662e-06	0.00840154	Significant
X21976.4	IKK-gamma	IKBKG	-0.00721666	0.00147976	1.23315e-06	6.93428e-06	0.00866784	Significant
X21939.6	ULA1/ UBA3	NAE1|UBA3	-0.00721648	0.00147982	1.23526e-06	6.94055e-06	0.00868263	Significant
X9233.71	TFPI -2	TFPI2	0.029695	0.00609092	1.24255e-06	6.97592e-06	0.00873385	Significant
X24942.22	UN13D	UNC13D	-0.00628042	0.0012883	1.24445e-06	6.98106e-06	0.00874727	Significant
X6909.40	MGAT2	MGAT2	0.0290317	0.00595703	1.25287e-06	7.02268e-06	0.00880644	Significant
X12738.43	NISCH	NISCH	0.00489242	0.00100388	1.26385e-06	7.07858e-06	0.00888362	Significant
X19236.24	TCP4	SUB1	-0.0124688	0.00255939	1.26517e-06	7.08032e-06	0.00889289	Significant
X19294.26	CRIPT	CRIPT	-0.00646365	0.00132789	1.29233e-06	7.22657e-06	0.0090838	Significant
X21979.8	Integrin a6	ITGA6	0.0037565	0.000772009	1.30253e-06	7.27779e-06	0.00915547	Significant
X8660.33	OLFL3	OLFML3	0.0286832	0.00589638	1.31151e-06	7.32219e-06	0.00921863	Significant
X6447.73	PTX3	PTX3	-0.00575534	0.00118331	1.31518e-06	7.33683e-06	0.0092444	Significant
X6998.106	HAAH	ASPH	0.0149112	0.0030668	1.3265e-06	7.39413e-06	0.009324	Significant
X2987.37	Histone H1.2	H1-2	-0.00794795	0.00163553	1.34305e-06	7.48044e-06	0.00944032	Significant
X23008.4	RAB2A	RAB2A	-0.0101028	0.00207906	1.34766e-06	7.50019e-06	0.00947273	Significant
X6574.11	FAIM3	FCMR	0.0283764	0.00584083	1.35415e-06	7.53029e-06	0.00951829	Significant
X17172.19	STAT	STATH	0.0140922	0.00290168	1.36757e-06	7.59649e-06	0.00961265	Significant
X21722.21	GALT4	GALNT4	0.0247718	0.00510143	1.36821e-06	7.59649e-06	0.00961716	Significant
X21219.7	RPAIN	RPAIN	0.00318838	0.000656727	1.37478e-06	7.62694e-06	0.00966334	Significant
X21382.70	RNZ1	ELAC1	-0.0105627	0.0021764	1.3914e-06	7.71307e-06	0.00978018	Significant
X18207.6	CHM1B	CHMP1B	-0.00725876	0.0014961	1.39708e-06	7.73842e-06	0.00982005	Significant
X25048.30	PACN2	PACSIN2	-0.0119928	0.00247242	1.40438e-06	7.77273e-06	0.00987137	Significant
X6117.4	NEC2	PCSK2	0.0122366	0.00252291	1.41238e-06	7.81053e-06	0.0099276	Significant
X21653.205	URM1	URM1	0.0192778	0.0039755	1.41343e-06	7.81053e-06	0.009935	Significant
X19202.10	BTK	BTK	-0.00646723	0.00133409	1.42492e-06	7.86784e-06	0.0100158	Significant
X10569.28	MFAP2	MFAP2	0.0219599	0.00453028	1.42735e-06	7.87507e-06	0.0100328	Significant
X17161.1	OST48	DDOST	0.0216744	0.00447437	1.44962e-06	7.9858e-06	0.0101894	Significant
X20110.25	HN1L	JPT2	-0.0073006	0.00150701	1.44969e-06	7.9858e-06	0.0101899	Significant
X2855.49	ERK-1	MAPK3	0.0199618	0.00412117	1.4551e-06	8.00931e-06	0.0102279	Significant
X3809.1	FGFR-3:CD	FGFR3	-0.007026	0.00145088	1.46038e-06	8.03209e-06	0.010265	Significant
X19743.12	VSTM1	VSTM1	-0.0100588	0.00207789	1.48118e-06	8.14011e-06	0.0104112	Significant
X6458.6	RPN1:LD	RPN1	0.0538343	0.0111335	1.52009e-06	8.34741e-06	0.0106847	Significant
X22504.3	N42L2	N4BP2L2	0.0188082	0.00389096	1.52467e-06	8.36605e-06	0.0107169	Significant
X19369.17	GCNL2	KAT2A	0.0101359	0.00209739	1.53411e-06	8.41126e-06	0.0107832	Significant
X11377.19	ADH7	ADH7	-0.00376	0.000778438	1.55683e-06	8.52922e-06	0.010943	Significant
X12415.122	EDF1	EDF1	-0.00702214	0.00145412	1.56329e-06	8.55792e-06	0.0109884	Significant
X8877.22	F176C:ECD	EVA1C	0.00713446	0.00147777	1.57306e-06	8.6047e-06	0.011057	Significant
X4160.49	MMP-2	MMP2	-0.0168579	0.00349635	1.62033e-06	8.85639e-06	0.0113893	Significant
X7859.21	PCDGK	PCDHGC3	0.0249226	0.00517913	1.69736e-06	9.26451e-06	0.0119308	Significant
X15619.49	MOG	MOG	0.00668576	0.00138919	1.69764e-06	9.26451e-06	0.0119327	Significant
X4969.2	Carbonic anhydrase I	CA1	-0.135376	0.0281624	1.73994e-06	9.48801e-06	0.01223	Significant
X24468.36	ADDB	ADD2	-0.00317158	0.000660124	1.7614e-06	9.59758e-06	0.0123809	Significant
X17396.23	ADH1A	ADH1A	-0.00821141	0.00170926	1.7667e-06	9.61898e-06	0.0124181	Significant
X12657.2	FCL	TSTA3	0.00677406	0.00141072	1.78804e-06	9.72768e-06	0.0125682	Significant
X13377.3	C56D1	CYB561D1	-0.0069565	0.00144903	1.79541e-06	9.76022e-06	0.01262	Significant
X21160.4	CHMP6	CHMP6	0.0138305	0.00288198	1.81903e-06	9.88098e-06	0.012786	Significant
X8924.55	CALY	CALY	0.037944	0.00790898	1.82214e-06	9.89019e-06	0.0128078	Significant
X21167.33	PTPM1	PTPMT1	-0.0068819	0.00143461	1.82844e-06	9.91675e-06	0.0128521	Significant
X5609.92	F19A5	TAFA5	0.021163	0.00441217	1.83068e-06	9.92123e-06	0.0128678	Significant
X21696.80	LRFN4	LRFN4	0.0222757	0.00464466	1.83544e-06	9.93936e-06	0.0129013	Significant
X21436.56	ATG4A	ATG4A	-0.00685814	0.00143057	1.85457e-06	1.00353e-05	0.0130358	Significant
X12641.3	I5P2	INPP5B	-0.0146665	0.00306015	1.86677e-06	1.00935e-05	0.0131215	Significant
X2962.50	PTHrP	PTHLH	0.0158142	0.0032997	1.86977e-06	1.0102e-05	0.0131426	Significant
X2649.77	sICAM-3	ICAM3	-0.00715353	0.00149316	1.88429e-06	1.01726e-05	0.0132447	Significant
X18285.6	SVIP	SVIP	0.0180427	0.00376722	1.899e-06	1.02441e-05	0.0133481	Significant
X9970.7	UBXN4:CD 2	UBXN4	0.00874265	0.00182561	1.90617e-06	1.02749e-05	0.0133985	Significant
X20069.23	GLYL2	GLYATL2	0.00679612	0.00141923	1.90969e-06	1.0286e-05	0.0134232	Significant
X19207.119	ADK	ADK	-0.00591723	0.00123596	1.918e-06	1.03229e-05	0.0134816	Significant
X3182.38	CD39	ENTPD1	0.020456	0.00427627	1.9515e-06	1.04951e-05	0.0137171	Significant
X5699.19	CI061	FAM189A2	0.0296247	0.00620058	2.00952e-06	1.07988e-05	0.0141249	Significant
X8992.1	TMEM2	CEMIP2	0.00734832	0.00153829	2.01947e-06	1.0844e-05	0.0141949	Significant
X19334.62	TXD12	TXNDC12	0.0167194	0.00350338	2.0613e-06	1.10602e-05	0.0144889	Significant
X10053.5	ILK1	ILK	-0.00732841	0.00153595	2.07543e-06	1.11221e-05	0.0145882	Significant
X6558.5	COL10	COLEC10	-0.00455906	0.000955572	2.076e-06	1.11221e-05	0.0145922	Significant
X14684.17	CAN2	CAPN2	0.0171471	0.00359485	2.08633e-06	1.11689e-05	0.0146648	Significant
X2829.19	IL-27	IL27|EBI3	-0.00669507	0.00140574	2.16062e-06	1.15579e-05	0.015187	Significant
X25102.23	ELP1	ELP1	-0.00678901	0.00142591	2.18208e-06	1.16638e-05	0.0153379	Significant
X15588.17	galactosidase, alpha	GLA	-0.0176724	0.00371178	2.18533e-06	1.16723e-05	0.0153607	Significant
X12384.92	CSN7B	COPS7B	-0.00640232	0.00134505	2.19044e-06	1.16907e-05	0.0153966	Significant
X8819.3	IGFBP-2	IGFBP2	0.0153354	0.00322224	2.19773e-06	1.17207e-05	0.0154478	Significant
X21768.9	MGT5A	MGAT5	0.02353	0.00494706	2.22629e-06	1.1864e-05	0.0156486	Significant
X2436.49	CXCL16, soluble	CXCL16	0.0246471	0.00518367	2.24418e-06	1.19503e-05	0.0157744	Significant
X12483.62	RORB	RORB	-0.00637777	0.00134266	2.29556e-06	1.22146e-05	0.0161355	Significant
X15402.2	ID-1	ID1	0.00559942	0.00117892	2.30371e-06	1.22487e-05	0.0161928	Significant
X3864.5	RS7	RPS7	-0.00733799	0.00154517	2.30882e-06	1.22666e-05	0.0162287	Significant
X5134.52	TIMD3	HAVCR2	0.0275486	0.00580689	2.36453e-06	1.25531e-05	0.0166203	Significant
X18297.8	RASM	MRAS	-0.00651792	0.00137397	2.36696e-06	1.25565e-05	0.0166374	Significant
X9854.36	Aldose reductase	AKR1B1	0.0254543	0.00536847	2.39904e-06	1.27171e-05	0.0168629	Significant
X3332.57	RGM-C	HJV	0.0442295	0.00932928	2.40181e-06	1.27222e-05	0.0168824	Significant
X20373.141	GID8	GID8	-0.0055393	0.00116858	2.41393e-06	1.27768e-05	0.0169675	Significant
X25227.20	TCAL2	TCEAL2	0.00566221	0.00119454	2.41669e-06	1.27817e-05	0.0169869	Significant
X15506.34	LRP12	LRP12	0.0132279	0.00279306	2.46144e-06	1.30086e-05	0.0173015	Significant
X10753.31	ADAM7	ADAM7	-0.0067582	0.00142727	2.47634e-06	1.30775e-05	0.0174062	Significant
X11254.13	PPN	PAPLN	0.00305453	0.00064639	2.58777e-06	1.36558e-05	0.0181895	Significant
X7871.16	T132A	TMEM132A	0.0206827	0.00437935	2.62009e-06	1.38159e-05	0.0184166	Significant
X24898.39	SCFD1	SCFD1	0.00587354	0.00124363	2.62219e-06	1.38166e-05	0.0184313	Significant
X13518.5	ASAP2	ASAP2	0.0142635	0.0030214	2.6475e-06	1.39395e-05	0.0186093	Significant
X13236.25	WNT3A	WNT3A	0.00769629	0.00163076	2.6709e-06	1.40522e-05	0.0187737	Significant
X11227.31	TBL2	TBL2	0.00541341	0.00114739	2.68269e-06	1.41037e-05	0.0188567	Significant
X23278.13	39S ribosomal protein L12	MRPL12	0.00678673	0.00143882	2.69866e-06	1.4177e-05	0.0189688	Significant
X3469.74	RPS6KA3	RPS6KA3	-0.00632536	0.00134201	2.74251e-06	1.43967e-05	0.0192771	Significant
X6455.52	HPLN4	HAPLN4	0.0232586	0.00493554	2.75355e-06	1.44438e-05	0.0193547	Significant
X13697.51	GPDA	GPD1	-0.0229093	0.00486071	2.75992e-06	1.44664e-05	0.0193994	Significant
X2913.1	MPIF-1	CCL23	0.033163	0.0070394	2.77235e-06	1.45208e-05	0.0194869	Significant
X22005.8	PDP1	PDP1	-0.0057588	0.00122408	2.86562e-06	1.49981e-05	0.0201425	Significant
X16919.1	ACBP	DBI	0.0172876	0.00367634	2.88921e-06	1.51103e-05	0.0203083	Significant
X6384.19	WFDC3	WFDC3	-0.00920462	0.00195773	2.90309e-06	1.51716e-05	0.0204058	Significant
X6521.35	NPTX2	NPTX2	-0.0404081	0.00859667	2.9167e-06	1.52314e-05	0.0205015	Significant
X11955.1	RHG01:Rho-GAP	ARHGAP1	0.0172361	0.00366742	2.92919e-06	1.52763e-05	0.0205893	Significant
X8851.42	F171B:ECD	FAM171B	0.0320321	0.00681606	2.92964e-06	1.52763e-05	0.0205925	Significant
X22144.65	FBX48	FBXO48	0.00726685	0.00154619	2.94202e-06	1.53295e-05	0.0206795	Significant
X19168.71	PPIP1	PSTPIP1	-0.00851035	0.00181147	2.9509e-06	1.53644e-05	0.0207419	Significant
X12347.29	CCM2	CCM2	0.00641724	0.00136703	3.00991e-06	1.566e-05	0.0211566	Significant
X4318.12	PTP-1C	PTPN6	-0.00618986	0.00131969	3.06261e-06	1.59224e-05	0.0215271	Significant
X11969.5	S100A2	S100A2	0.00451484	0.00096299	3.09996e-06	1.61047e-05	0.0217896	Significant
X17466.72	ACSF2	ACSF2	-0.00399273	0.000852909	3.20161e-06	1.66205e-05	0.0225041	Significant
X13658.31	PDGF-CC	PDGFC	0.0229551	0.00490685	3.24593e-06	1.68381e-05	0.0228156	Significant
X3891.56	MBD4	MBD4	-0.00676352	0.00144634	3.27541e-06	1.69785e-05	0.0230228	Significant
X7066.199	F209B	FAM209B	0.00707788	0.001515	3.3512e-06	1.73586e-05	0.0235556	Significant
X18830.1	Omentin	ITLN1	-0.00686306	0.0014695	3.37647e-06	1.7467e-05	0.0237332	Significant
X15315.64	CUTC	CUTC	-0.00626199	0.0013409	3.37711e-06	1.7467e-05	0.0237377	Significant
X12931.16	MCR	NR3C2	0.023819	0.00510376	3.42616e-06	1.77077e-05	0.0240825	Significant
X18897.31	HDAC2	HDAC2	-0.0123303	0.00264239	3.43631e-06	1.77471e-05	0.0241538	Significant
X4337.49	CRP	CRP	-0.126518	0.027118	3.45069e-06	1.78083e-05	0.0242549	Significant
X15386.7	FABPA	FABP4	-0.0431474	0.00924864	3.45978e-06	1.78421e-05	0.0243188	Significant
X5462.62	Ficolin-3	FCN3	-0.0466229	0.0100069	3.56387e-06	1.83654e-05	0.0250504	Significant
X17347.80	CA080	AIDA	-0.0313905	0.00674826	3.68773e-06	1.89898e-05	0.0259211	Significant
X13423.94	CJ058	PRXL2A	0.00705388	0.00151694	3.78531e-06	1.94702e-05	0.0266069	Significant
X23176.17	Beta-dystroglycan	DAG1	0.0214057	0.00460734	3.78657e-06	1.94702e-05	0.0266158	Significant
X25948.18	PKN2	PKN2	0.0147103	0.00316776	3.8432e-06	1.9747e-05	0.0270139	Significant
X20243.26	Profilin-1	PFN1	0.0238295	0.00513311	3.85024e-06	1.97687e-05	0.0270634	Significant
X14125.5	ApoM	APOM	-0.0233001	0.00502203	3.90994e-06	2.00483e-05	0.027483	Significant
X22978.13	HMG-2	HMGB2	-0.00658914	0.00142034	3.91268e-06	2.00483e-05	0.0275022	Significant
X12786.61	GDE5	GPCPD1	0.0100839	0.00217372	3.91325e-06	2.00483e-05	0.0275062	Significant
X9443.137	cathepsin K	CTSK	0.0191309	0.00412405	3.92898e-06	2.01142e-05	0.0276168	Significant
X13669.6	FGFR-3:ECD	FGFR3	0.0253939	0.00547923	3.99436e-06	2.0434e-05	0.0280764	Significant
X6263.77	PLTP	PLTP	-0.00806704	0.00174054	3.99908e-06	2.04433e-05	0.0281096	Significant
X14120.2	RNF43	RNF43	-0.00647829	0.00139806	4.02412e-06	2.05563e-05	0.0282855	Significant
X23675.16	CEP76	CEP76	-0.00479219	0.00103455	4.04457e-06	2.06458e-05	0.0284293	Significant
X2692.74	NPS-PLA2	PLA2G2A	-0.0229338	0.00495015	4.05382e-06	2.06674e-05	0.0284943	Significant
X6895.1	TR:CD	TFRC	-0.00765397	0.0016524	4.05469e-06	2.06674e-05	0.0285004	Significant
X8289.8	GPNMB:ECD	GPNMB	0.032072	0.0069289	4.10739e-06	2.09209e-05	0.0288709	Significant
X12518.289	PB1	PBRM1	-0.00618842	0.00133734	4.13402e-06	2.10413e-05	0.029058	Significant
X9851.9	FABPA	FABP4	-0.0396001	0.00855927	4.15592e-06	2.11375e-05	0.029212	Significant
X6965.19	CNTP2	CNTNAP2	0.0256232	0.00553917	4.1633e-06	2.11597e-05	0.0292638	Significant
X18323.39	DRP-1	CRMP1	0.00472842	0.00102246	4.19084e-06	2.12843e-05	0.0294574	Significant
X16915.153	SEM4A	SEMA4A	0.0243227	0.00526012	4.19976e-06	2.13142e-05	0.0295201	Significant
X14662.6	MZF1	MZF1	-0.00970228	0.00209938	4.25181e-06	2.15627e-05	0.0298859	Significant
X7744.10	LRP12	LRP12	0.0225375	0.00488176	4.35029e-06	2.20463e-05	0.0305782	Significant
X13657.2	PNKP	PNKP	-0.00677346	0.00146832	4.42168e-06	2.23919e-05	0.03108	Significant
X12690.33	2023-09-10	SEPTIN10	-0.00621299	0.00134707	4.45291e-06	2.25338e-05	0.0312995	Significant
X18883.4	DEST	DSTN	0.010872	0.00236097	4.59826e-06	2.32526e-05	0.0323212	Significant
X15495.9	FOLR3	FOLR3	0.00941076	0.00204445	4.64927e-06	2.34937e-05	0.0326798	Significant
X20165.4	DPYS	DPYS	-0.0119304	0.00259281	4.68828e-06	2.36738e-05	0.0329539	Significant
X12595.11	TMOD1	TMOD1	-0.00776045	0.00168721	4.72793e-06	2.38569e-05	0.0332326	Significant
X11402.17	KMT2C	KMT2C	-0.00700947	0.00152489	4.79755e-06	2.41908e-05	0.033722	Significant
X6069.71	SUMF2	SUMF2	0.0148787	0.00323776	4.81221e-06	2.42473e-05	0.033825	Significant
X21189.9	NUBP1	NUBP1	0.0367304	0.00799894	4.91935e-06	2.47694e-05	0.0345781	Significant
X4995.16	HPG-	HPGD	0.0102799	0.0022401	4.97713e-06	2.50424e-05	0.0349842	Significant
X8475.15	MMP-7	MMP7	0.00716713	0.0015632	5.07203e-06	2.54977e-05	0.0356513	Significant
X21240.6	GCST	AMT	-0.0112037	0.00244323	5.07487e-06	2.54977e-05	0.0356713	Significant
X8891.7	CPVL	CPVL	0.0089515	0.00195307	5.09705e-06	2.55908e-05	0.0358272	Significant
X17405.2	UCHL5	UCHL5	-0.00645832	0.00140953	5.13868e-06	2.57814e-05	0.0361198	Significant
X11129.66	BMP15	BMP15	-0.00743781	0.00162408	5.18287e-06	2.59846e-05	0.0364304	Significant
X21687.3	PPR29	ELFN2	0.0257008	0.00561261	5.19022e-06	2.60029e-05	0.036482	Significant
X17764.108	RHOC	RHOC	-0.0122933	0.00268462	5.19989e-06	2.60328e-05	0.03655	Significant
X6531.29	F162A	FAM162A	0.00326974	0.00071423	5.21975e-06	2.61136e-05	0.0366896	Significant
X23623.48	NUD11	NUDT11	0.00698259	0.0015269	5.34468e-06	2.67196e-05	0.0375677	Significant
X11179.7	TSSK1	TSSK1B	0.00758151	0.00165815	5.36082e-06	2.67812e-05	0.0376812	Significant
X5703.26	NOE1	OLFM1	0.0388913	0.00851019	5.41571e-06	2.70362e-05	0.038067	Significant
X20374.41	COQ9	COQ9	-0.00953595	0.00208735	5.45847e-06	2.72303e-05	0.0383676	Significant
X12784.10	APBB3:PID 1	APBB3	-0.00525518	0.00115086	5.51159e-06	2.74759e-05	0.038741	Significant
X8424.269	b-Catenin	CTNNB1	-0.00662971	0.00145219	5.53581e-06	2.7577e-05	0.0389112	Significant
X3400.49	TBK1	TBK1	-0.00696469	0.00152677	5.62831e-06	2.8018e-05	0.0395614	Significant
X11270.17	CHC10	CHCHD10	0.0107256	0.00235136	5.64447e-06	2.80786e-05	0.039675	Significant
X6544.33	NELL1	NELL1	0.0207427	0.00455164	5.75423e-06	2.86043e-05	0.0404465	Significant
X10073.22	TYDP1	TDP1	-0.00710807	0.00156077	5.83202e-06	2.89705e-05	0.0409933	Significant
X5356.2	MIF	MIF	0.0166898	0.00366555	5.86829e-06	2.91301e-05	0.0412482	Significant
X4545.53	DnaJ homolog	DNAJC19	-0.00671007	0.0014739	5.87692e-06	2.91524e-05	0.0413089	Significant
X15614.168	LIRA2	LILRA2	0.0294411	0.00646896	5.91862e-06	2.93385e-05	0.041602	Significant
X13076.4	FXR1	FXR1	-0.00580836	0.00127639	5.94118e-06	2.94295e-05	0.0417605	Significant
X12867.40	DYLT3	DYNLT3	-0.00460506	0.00101252	5.99879e-06	2.9694e-05	0.0421655	Significant
X15446.25	SMDF	NRG1	0.0146341	0.00321783	6.02689e-06	2.98121e-05	0.042363	Significant
X12575.30	C1TC	MTHFD1	-0.013375	0.00294207	6.08008e-06	3.00541e-05	0.0427369	Significant
X21658.15	PHB2	PHB2	-0.00541964	0.00119246	6.09294e-06	3.00965e-05	0.0428273	Significant
X15413.3	LCAT	LCAT	-0.0126053	0.00277638	6.22436e-06	3.0724e-05	0.043751	Significant
X23359.25	FL2D	WTAP	0.0209785	0.00462269	6.28438e-06	3.09985e-05	0.0441729	Significant
X18306.1	PALM	PALM	0.00692689	0.0015265	6.31297e-06	3.11177e-05	0.0443739	Significant
X6387.61	HD-5	DEFA5	-0.00636813	0.00140437	6.39117e-06	3.14811e-05	0.0449235	Significant
X21280.13	T22D3	TSC22D3	-0.00545004	0.00120206	6.42022e-06	3.1602e-05	0.0451277	Significant
X19338.3	LZIC	LZIC	0.00639055	0.0014097	6.43581e-06	3.16566e-05	0.0452373	Significant
X15431.31	OTCase	OTC	-0.0177597	0.00391778	6.4714e-06	3.18094e-05	0.0454874	Significant
X25938.13	NGN3	NEUROG3	0.00539184	0.00119012	6.53688e-06	3.21088e-05	0.0459477	Significant
X24645.2	BIN3	BIN3	0.00647214	0.0014288	6.54242e-06	3.21136e-05	0.0459867	Significant
X3739.72	gpIIbIIIa	ITGA2B|ITGB3	-0.00929522	0.00205208	6.56736e-06	3.22135e-05	0.0461619	Significant
X11177.16	K2C5	KRT5	-0.00626879	0.00138514	6.6618e-06	3.2654e-05	0.0468258	Significant
X6590.54	Neuropilin-2	NRP2	0.0202747	0.00448037	6.67227e-06	3.26825e-05	0.0468994	Significant
X14705.1	VEGF-D	VEGFD	0.0153356	0.00338957	6.70583e-06	3.2824e-05	0.0471353	Significant
X21862.145	LASP-1	LASP1	0.0245563	0.00543007	6.76762e-06	3.31034e-05	0.0475696	Significant
X10880.38	F163B	FAM163B	0.0276856	0.00612506	6.83414e-06	3.33901e-05	0.0480372	Significant
X21746.13	UBP10	USP10	0.0029604	0.000654902	6.83782e-06	3.33901e-05	0.048063	Significant
X9598.23	CSMD1	CSMD1	0.005492	0.001215	6.84049e-06	3.33901e-05	0.0480818	Significant
X21106.206	CETN1	CETN1	-0.00565602	0.00125137	6.8502e-06	3.34143e-05	0.04815	Significant
X25073.13	UBE4A	UBE4A	-0.00883051	0.00195414	6.87571e-06	3.35155e-05	0.0483293	Significant
X7142.5	CBPN	CPN1	-0.00751396	0.00166283	6.88177e-06	3.35218e-05	0.048372	Significant
X21385.5	SLIK2	SLITRK2	0.0326938	0.0072358	6.8913e-06	3.3535e-05	0.048439	Significant
X17337.1	TYY1	YY1	-0.00786194	0.00174007	6.89547e-06	3.3535e-05	0.0484683	Significant
X15525.294	ADH1G	ADH1C	-0.0118925	0.00263176	6.89879e-06	3.3535e-05	0.0484916	Significant
X12888.18	SAP30	SAP30	-0.00914597	0.00202445	6.91551e-06	3.3593e-05	0.0486091	Significant
X2704.74	TACI	TNFRSF13B	-0.00660422	0.00146206	6.94084e-06	3.36928e-05	0.0487871	Significant
X13618.15	MD1L1	MAD1L1	-0.0051026	0.00112995	6.97523e-06	3.38364e-05	0.0490289	Significant
X20542.47	CALCR	CALCR	-0.00500264	0.00110841	7.05452e-06	3.41974e-05	0.0495862	Significant
X2746.56	TSLP R	CRLF2	-0.00593728	0.00131589	7.09871e-06	3.43879e-05	0.0498968	Significant
X2870.29	RAC1	RAC1	-0.0281847	0.00625183	7.22168e-06	3.49595e-05	0.0507612	Significant
X19117.3	PP14A	PPP1R14A	0.00832826	0.00184874	7.35859e-06	3.55977e-05	0.0517235	Significant
X23298.148	THEM4	THEM4	-0.00611688	0.00135818	7.38364e-06	3.5687e-05	0.0518996	Significant
X10643.16	NOE3:C-term	OLFM3	-0.00695193	0.00154348	7.3872e-06	3.5687e-05	0.0519246	Significant
X8768.4	Bcl-10	BCL10	-0.00566127	0.00125735	7.41416e-06	3.57927e-05	0.0521141	Significant
X4560.34	LCK	LCK	-0.00599697	0.00133645	7.95748e-06	3.83892e-05	0.0559331	Significant
X3202.28	KREM2	KREMEN2	-0.00745909	0.00166327	8.06055e-06	3.88598e-05	0.0566576	Significant
X20541.73	CD1B	CD1B	-0.00758428	0.00169345	8.29076e-06	3.99423e-05	0.0582758	Significant
X11572.4	DYN2	DNM2	0.0135458	0.00302477	8.29746e-06	3.99471e-05	0.0583228	Significant
X21829.8	RS12	RPS12	-0.013485	0.00301096	8.30493e-06	3.99557e-05	0.0583753	Significant
X3666.17	complement factor H-related 5	CFHR5	-0.0133652	0.00298477	8.33518e-06	4.00739e-05	0.058588	Significant
X22499.15	MED28	MED28	-0.0070092	0.00156718	8.51731e-06	4.09215e-05	0.0598682	Significant
X23408.1	Sorting nexin 16	SNX16	0.00792185	0.00177141	8.58414e-06	4.12144e-05	0.0603379	Significant
X19361.78	MATN3	MATN3	0.0301054	0.00673417	8.596e-06	4.12432e-05	0.0604213	Significant
X4217.49	ERAB	HSD17B10	-0.00684335	0.00153245	8.78885e-06	4.21397e-05	0.0617768	Significant
X13126.52	DSC2	DSC2	0.0166807	0.0037358	8.81195e-06	4.22109e-05	0.0619392	Significant
X18866.8	CANB2	PPP3R2	-0.00595471	0.00133362	8.81741e-06	4.22109e-05	0.0619776	Significant
X22099.1	CD036	C4orf36	0.00362739	0.000812425	8.82171e-06	4.22109e-05	0.0620078	Significant
X20953.34	MMAC	MMACHC	-0.00668716	0.00149806	8.86708e-06	4.23991e-05	0.0623267	Significant
X3352.80	Carbonic anhydrase 6	CA6	-0.0456477	0.0102306	8.95633e-06	4.27968e-05	0.062954	Significant
X8330.1	LRP11	LRP11	0.0290326	0.00650863	8.99044e-06	4.29306e-05	0.0631938	Significant
X13595.20	THTPA	THTPA	-0.0105452	0.00236572	9.1372e-06	4.35877e-05	0.0642254	Significant
X11121.56	VWC2	VWC2	0.023852	0.00535157	9.14046e-06	4.35877e-05	0.0642483	Significant
X9038.12	JTB	JTB	0.0180766	0.00405761	9.23041e-06	4.39868e-05	0.0648806	Significant
X10370.21	STAT1	STAT1	-0.00785684	0.00176523	9.42213e-06	4.487e-05	0.0662281	Significant
X19808.26	RAB3D	RAB3D	-0.00876384	0.00196915	9.47249e-06	4.50793e-05	0.0665822	Significant
X9384.17	Cathelicidin peptide	CAMP	-0.00644166	0.00144851	9.5672e-06	4.54698e-05	0.0672478	Significant
X12817.1	GEM	GEM	-0.00574642	0.00129198	9.56748e-06	4.54698e-05	0.0672498	Significant
X2605.49	CD30	TNFRSF8	0.0149104	0.00335393	9.63033e-06	4.57376e-05	0.0676916	Significant
X3234.23	URB	CCDC80	0.0226713	0.00510014	9.66066e-06	4.58506e-05	0.0679048	Significant
X13723.6	IL-10	IL10	-0.00756948	0.00170292	9.68435e-06	4.59321e-05	0.0680713	Significant
X6283.60	MCEM1	MCEMP1	-0.00623792	0.00140393	9.76956e-06	4.63049e-05	0.0686702	Significant
X2849.49	AIF1	AIF1	0.0239141	0.00538631	9.89235e-06	4.68553e-05	0.0695333	Significant
X16320.139	CD320	CD320	0.020853	0.00469784	9.94005e-06	4.70496e-05	0.0698686	Significant
X10030.8	MutY homolog	MUTYH	0.00555376	0.0012517	1.0037e-05	4.74763e-05	0.0705497	Significant
X15426.5	NEUR1	NEU1	-0.0268761	0.00606357	1.02292e-05	4.8353e-05	0.0719009	Significant
X18273.14	GGE2D	GAGE2D	0.00317362	0.000716274	1.03217e-05	4.87574e-05	0.072551	Significant
X7049.2	ADAM 23	ADAM23	0.0273274	0.00617377	1.05133e-05	4.96133e-05	0.0738977	Significant
X21286.29	RL11	RPL11	-0.00645893	0.00145911	1.0517e-05	4.96133e-05	0.0739238	Significant
X5687.5	GLU2B	PRKCSH	0.0200257	0.00452489	1.05481e-05	4.97269e-05	0.0741428	Significant
X7806.33	B4GT7	B4GALT7	0.0136423	0.00308305	1.05845e-05	4.98648e-05	0.0743983	Significant
X18321.38	MTDC	MTHFD2	-0.00698456	0.00157902	1.06605e-05	5.01893e-05	0.0749327	Significant
X24111.10	EF1G	EEF1G	-0.00491261	0.0011107	1.06819e-05	5.02564e-05	0.0750831	Significant
X11458.30	PCBP1	PCBP1	0.0216983	0.00490923	1.08364e-05	5.09171e-05	0.0761691	Significant
X3522.57	Vasoactive Intestinal Peptide	VIP	0.00640007	0.00144798	1.08368e-05	5.09171e-05	0.0761721	Significant
X4568.17	SLIK5	SLITRK5	0.0261172	0.00591278	1.09686e-05	5.15019e-05	0.0770983	Significant
X9750.7	S100A4	S100A4	-0.00744425	0.0016864	1.11142e-05	5.21509e-05	0.078122	Significant
X17436.193	CSNK1G2	CSNK1G2	-0.00660154	0.0014966	1.12766e-05	5.28775e-05	0.0792634	Significant
X4144.13	MCP-4	CCL13	-0.00685015	0.00155366	1.13739e-05	5.3269e-05	0.0799474	Significant
X9261.14	EphB6	EPHB6	0.0347975	0.00789209	1.13753e-05	5.3269e-05	0.0799567	Significant
X17383.4	STAR5	STARD5	-0.00647411	0.00146839	1.13869e-05	5.32879e-05	0.0800384	Significant
X10748.216	PCDB2	PCDHB2	-0.00510934	0.00115953	1.1522e-05	5.38845e-05	0.0809884	Significant
X2505.49	GFRa-3	GFRA3	-0.00633001	0.00143704	1.16005e-05	5.42155e-05	0.0815401	Significant
X23700.42	ABCF3	ABCF3	-0.00564505	0.00128219	1.17186e-05	5.47311e-05	0.0823703	Significant
X21306.7	HAUS1	HAUS1	-0.00403982	0.000917909	1.18107e-05	5.51244e-05	0.0830174	Significant
X7211.2	RNase 1	RNASE1	0.0459381	0.010439	1.18196e-05	5.51292e-05	0.0830797	Significant
X23783.22	F110A	FAM110A	-0.0073065	0.00166152	1.19916e-05	5.58947e-05	0.0842891	Significant
X15481.45	LL-37	CAMP	-0.033417	0.00760103	1.21036e-05	5.63791e-05	0.085076	Significant
X19638.9	Dynorphin A (1-17)	PDYN	0.0216539	0.00492875	1.22149e-05	5.68598e-05	0.0858583	Significant
X7832.181	Protein disulfide isomerase A3	PDIA3	0.0151323	0.0034453	1.22798e-05	5.71243e-05	0.0863148	Significant
X2524.56	HMG-1	HMGB1	-0.0072133	0.00164299	1.23886e-05	5.75925e-05	0.0870798	Significant
X11360.39	RRM1	RRM1	-0.0168732	0.00384289	1.24314e-05	5.77532e-05	0.0873806	Significant
X9212.22	CATF	CTSF	-0.0230682	0.00525642	1.24826e-05	5.79526e-05	0.0877402	Significant
X15641.20	TEFF1	TMEFF1	0.0229637	0.00523522	1.2607e-05	5.84916e-05	0.0886148	Significant
X8225.86	EPHB2	EPHB2	0.0213673	0.00487266	1.26799e-05	5.87911e-05	0.0891273	Significant
X21823.5	PPM1G	PPM1G	0.0129001	0.00294379	1.28547e-05	5.9562e-05	0.0903556	Significant
X5707.55	ELK3	ELK3	-0.0083642	0.00190904	1.2907e-05	5.9765e-05	0.0907233	Significant
X8045.3	KI3L3:CD	KIR3DL3	0.022929	0.00523813	1.31361e-05	6.07856e-05	0.0923333	Significant
X9470.15	MET24	METTL24	0.0202695	0.00463222	1.32271e-05	6.11666e-05	0.0929732	Significant
X14064.21	PGRP-S	PGLYRP1	0.00418441	0.000956674	1.33517e-05	6.17021e-05	0.093849	Significant
X6421.52	IFN16	IFNA16	0.00422564	0.00096649	1.34745e-05	6.22286e-05	0.094712	Significant
X7776.20	UNC5B	UNC5B	0.019274	0.0044096	1.35206e-05	6.24009e-05	0.0950366	Significant
X15364.101	Apo C-I	APOC1	-0.00479329	0.00109723	1.3669e-05	6.30443e-05	0.0960795	Significant
X5245.40	AMPK a2b2g1	PRKAA2|PRKAB2|PRKAG1	-0.00768268	0.00175873	1.37174e-05	6.3226e-05	0.0964196	Significant
X16758.96	HDGF	HDGF	-0.0085901	0.00196677	1.37341e-05	6.32613e-05	0.0965367	Significant
X8244.16	FUT8	FUT8	0.0289611	0.00663241	1.37846e-05	6.34526e-05	0.0968921	Significant
X4909.68	Galectin-8	LGALS8	0.00554145	0.00126898	1.3807e-05	6.35141e-05	0.0970495	Significant
X20055.40	AL1A2	ALDH1A2	-0.0513922	0.0117725	1.38837e-05	6.3825e-05	0.0975885	Significant
X5066.134	CLM6	CD300C	0.0259151	0.00593718	1.38957e-05	6.38385e-05	0.097673	Significant
X11405.150	CARD9	CARD9	-0.00618236	0.00141655	1.39412e-05	6.40056e-05	0.0979925	Significant
X3312.64	FCGR1	FCGR1A	0.0228276	0.0052346	1.41491e-05	6.49175e-05	0.0994537	Significant
X21670.52	WWP2	WWP2	0.00771782	0.0017712	1.43803e-05	6.59355e-05	0.101079	Significant
X20385.21	CPTP	CPTP	0.0039945	0.000917351	1.45676e-05	6.67506e-05	0.102395	Significant
X4993.16	GSTA3	GSTA3	0.0136816	0.00314204	1.45812e-05	6.67696e-05	0.102491	Significant
X23342.4	ARRD5	ARRDC5	-0.0117187	0.00269186	1.46354e-05	6.69743e-05	0.102872	Significant
X16591.71	CHIA	CHIA	0.0112254	0.00257909	1.46943e-05	6.72001e-05	0.103287	Significant
X5275.28	VAV	VAV1	-0.00721115	0.00165747	1.48062e-05	6.76677e-05	0.104073	Significant
X4815.25	TXD12	TXNDC12	-0.0153148	0.00352033	1.48373e-05	6.77659e-05	0.104292	Significant
X2645.54	PKC-Z	PRKCZ	-0.0068898	0.00158394	1.4869e-05	6.78665e-05	0.104514	Significant
X21498.3	AL7A1	ALDH7A1	0.0116593	0.002681	1.49447e-05	6.81675e-05	0.105046	Significant
X2765.4	GDF-11/8	GDF11|MSTN	0.0193799	0.00445789	1.50279e-05	6.85025e-05	0.105631	Significant
X2949.6	GX	PLA2G10	-0.0064813	0.00149109	1.50699e-05	6.86494e-05	0.105926	Significant
X22774.20	SEN34	TSEN34	-0.00590227	0.00135808	1.51288e-05	6.88733e-05	0.10634	Significant
X18204.1	TCEA1	TCEA1	-0.018672	0.00430113	1.54515e-05	7.02967e-05	0.108608	Significant
X13687.5	I-309	CCL1	0.00868822	0.00200118	1.54658e-05	7.03164e-05	0.108709	Significant
X7231.37	TM11A	TMPRSS11A	-0.00323034	0.000744718	1.57002e-05	7.1336e-05	0.110357	Significant
X13007.66	LCN10	LCN10	-0.00687355	0.0015863	1.60254e-05	7.27666e-05	0.112643	Significant
X20458.22	NDUA2	NDUFA2	0.00546432	0.00126121	1.60613e-05	7.28826e-05	0.112895	Significant
X23656.9	PUS7	PUS7	0.0320506	0.00739685	1.61272e-05	7.31341e-05	0.113358	Significant
X24413.96	NUDT7	NUDT7	-0.00845831	0.00195316	1.62245e-05	7.35282e-05	0.114042	Significant
X2993.1	IL-18 Rb	IL18RAP	-0.00361655	0.000835273	1.62606e-05	7.36442e-05	0.114296	Significant
X10703.203	SDS3	SUDS3	-0.00768626	0.00177546	1.63074e-05	7.38088e-05	0.114625	Significant
X9070.1	CQ067	C17orf67	0.00450236	0.00104103	1.6641e-05	7.527e-05	0.11697	Significant
X24909.40	Phospholipase C-delta-1	PLCD1	0.0256356	0.00592986	1.67437e-05	7.56857e-05	0.117691	Significant
X7178.59	DEPP	DEPP1	-0.00593447	0.00137284	1.67839e-05	7.58187e-05	0.117974	Significant
X6713.4	LRP11	LRP11	0.0168911	0.00391296	1.72292e-05	7.77802e-05	0.121104	Significant
X16593.3	FADD	FADD	0.00877871	0.00203378	1.72724e-05	7.79253e-05	0.121408	Significant
X11699.16	TP4A2	PTP4A2	0.00952228	0.00220644	1.73156e-05	7.80703e-05	0.121712	Significant
X3591.51	Cadherin-6	CDH6	-0.00798179	0.00185005	1.74824e-05	7.87718e-05	0.122884	Significant
X6039.24	CRHBP	CRHBP	-0.0224566	0.00520628	1.74943e-05	7.87749e-05	0.122968	Significant
X23662.10	3BP5	SH3BP5	-0.0072859	0.00168927	1.75211e-05	7.88448e-05	0.123156	Significant
X3208.2	MATN3	MATN3	-0.00716349	0.00166165	1.76757e-05	7.94899e-05	0.124243	Significant
X11145.72	K154L	KIAA1549L	0.0366001	0.0084903	1.76871e-05	7.94902e-05	0.124323	Significant
X6342.10	Nephronectin	NPNT	0.0212066	0.00492303	1.79414e-05	8.05813e-05	0.12611	Significant
X10039.32	PNP	PNP	-0.0561809	0.0130417	1.79832e-05	8.07178e-05	0.126404	Significant
X16863.47	NANP	NANP	-0.00558278	0.00129623	1.80048e-05	8.07633e-05	0.126556	Significant
X11480.1	Aldehyde dehydrogenase, class 3	ALDH3A1	-0.0043942	0.00102047	1.80838e-05	8.10657e-05	0.127111	Significant
X11814.29	Met	MET	0.0156712	0.00364004	1.8191e-05	8.14943e-05	0.127865	Significant
X17837.5	CLIC2	CLIC2	-0.0270544	0.00629379	1.86982e-05	8.37131e-05	0.13143	Significant
X3342.76	ABL2	ABL2	0.00824477	0.00191821	1.87166e-05	8.37423e-05	0.131559	Significant
X15472.16	LRP11	LRP11	0.026196	0.00609526	1.8742e-05	8.37482e-05	0.131737	Significant
X25245.22	RIC8A	RIC8A	0.0173776	0.00404332	1.87496e-05	8.37482e-05	0.131791	Significant
X23006.19	PI42B	PIP4K2B	-0.00581088	0.00135206	1.87537e-05	8.37482e-05	0.13182	Significant
X2501.51	Cadherin E	CDH1	-0.0264802	0.00616287	1.88453e-05	8.4104e-05	0.132464	Significant
X13623.4	MLL2	KMT2D	-0.00621218	0.0014461	1.89181e-05	8.43752e-05	0.132975	Significant
X10572.65	CST8	CST8	0.0330423	0.00769742	1.91749e-05	8.54661e-05	0.13478	Significant
X18833.76	PEA15	PEA15	0.0421472	0.00981215	1.92028e-05	8.55365e-05	0.134977	Significant
X13668.44	Dtk	TYRO3	0.0192795	0.00449188	1.92218e-05	8.55668e-05	0.13511	Significant
X18257.64	SRP19	SRP19	0.00730048	0.00170078	1.92895e-05	8.58137e-05	0.135586	Significant
X22377.27	IER2	IER2	-0.00695773	0.0016222	1.95107e-05	8.67432e-05	0.137141	Significant
X15394.79	UNC5B	UNC5B	0.018194	0.00424272	1.9554e-05	8.68805e-05	0.137445	Significant
X2891.1	CD22	CD22	-0.00704115	0.00164205	1.95776e-05	8.69149e-05	0.137611	Significant
X21991.79	NEB2	PPP1R9B	-0.00481304	0.00112247	1.95865e-05	8.69149e-05	0.137673	Significant
X5735.54	C1GLC	C1GALT1C1	0.022572	0.00526424	1.96036e-05	8.69362e-05	0.137794	Significant
X18945.11	RGS1	RGS1	-0.00560384	0.00130701	1.96213e-05	8.69596e-05	0.137918	Significant
X20433.19	RM01	MRPL1	-0.00655188	0.00152877	1.97799e-05	8.75958e-05	0.139033	Significant
X7071.23	MA1B1	MAN1B1	0.0112835	0.00263285	1.97897e-05	8.75958e-05	0.139102	Significant
X6262.14	IL-17B R	IL17RB	-0.00657758	0.00153519	1.98774e-05	8.79284e-05	0.139718	Significant
X3854.24	NACA	NACA	-0.0072864	0.00170095	1.99639e-05	8.82555e-05	0.140326	Significant
X10056.5	FOXM1	FOXM1	-0.00558486	0.00130386	1.99895e-05	8.83131e-05	0.140506	Significant
X4153.11	alpha-1-antichymotrypsin complex	SERPINA3	0.0235099	0.00549024	2.00947e-05	8.87221e-05	0.141246	Significant
X5441.67	Troponin I	TNNI3	0.00439381	0.0010261	2.01163e-05	8.87616e-05	0.141397	Significant
X12772.8	NUP98	NUP98	-0.00579393	0.00135328	2.01596e-05	8.88972e-05	0.141702	Significant
X12848.9	ARHG2	ARHGEF2	-0.00633065	0.00147896	2.02343e-05	8.91705e-05	0.142227	Significant
X20590.13	NPY	NPY	0.0277398	0.00648138	2.02872e-05	8.93474e-05	0.142599	Significant
X21655.18	FOPNL	CEP20	-0.0125662	0.00293928	2.08051e-05	9.1571e-05	0.146239	Significant
X21196.29	SAMN1	SAMSN1	-0.00834018	0.00195176	2.09139e-05	9.19923e-05	0.147004	Significant
X10049.112	TERF1	TERF1	-0.00263051	0.000615786	2.10386e-05	9.24829e-05	0.14788	Significant
X4915.64	Hemoglobin	HBA1|HBB	-0.269389	0.0630768	2.11262e-05	9.281e-05	0.148496	Significant
X21691.27	LRFN3	LRFN3	-0.00537001	0.00125766	2.12342e-05	9.3226e-05	0.149255	Significant
X24425.8	SYMC	MARS1	-0.0100029	0.0023441	2.1465e-05	9.41807e-05	0.150877	Significant
X7809.22	SPAT9	SPATA9	0.0182819	0.00428455	2.15134e-05	9.43342e-05	0.151218	Significant
X23038.63	UNC5B	UNC5B	0.0190972	0.00447688	2.16016e-05	9.46617e-05	0.151837	Significant
X15447.45	Sorbitol dehydrogenase	SORD	-0.00927738	0.00217556	2.17728e-05	9.53526e-05	0.153041	Significant
X11152.46	kallikrein 13	KLK13	-0.0194832	0.00457027	2.18932e-05	9.58201e-05	0.153887	Significant
X9744.139	DNJA4	DNAJA4	0.00551272	0.00129329	2.1922e-05	9.58865e-05	0.15409	Significant
X25963.2	XPO5	XPO5	-0.00535772	0.00125898	2.26321e-05	9.8931e-05	0.159081	Significant
X10974.20	ISK7	SPINK7	-0.00780878	0.00183547	2.27391e-05	9.93368e-05	0.159833	Significant
X19251.56	Platelet proteoglycan	SRGN	-0.00566109	0.00133078	2.27594e-05	9.93639e-05	0.159976	Significant
X13123.3	FLRT3:ECD	FLRT3	0.0149722	0.00352017	2.28168e-05	9.95528e-05	0.160379	Significant
X9957.9	RN114	RNF114	-0.00688493	0.00161936	2.30051e-05	0.000100312	0.161703	Significant
X12987.12	SRSF7	SRSF7	0.0052629	0.00123843	2.32183e-05	0.000101179	0.163202	Significant
X21115.48	BN3D2	BCDIN3D	-0.0397613	0.00935967	2.33303e-05	0.000101604	0.163989	Significant
X14655.1	DJC17	DNAJC17	-0.00504636	0.0011881	2.34185e-05	0.000101925	0.164609	Significant
X3470.1	sE-Selectin	SELE	-0.0453404	0.0106777	2.3546e-05	0.000102417	0.165505	Significant
X3042.7	Myoglobin	MB	-0.0571876	0.0134699	2.36068e-05	0.000102595	0.165932	Significant
X20083.1	RAB6A	RAB6A	0.0204194	0.00480957	2.36162e-05	0.000102595	0.165998	Significant
X16845.15	MPZL1	MPZL1	0.00876525	0.00206523	2.37551e-05	0.000103134	0.166975	Significant
X11540.37	FOXO3A	FOXO3	-0.00601941	0.00141835	2.37942e-05	0.000103241	0.16725	Significant
X25280.2	LIMD1	LIMD1	0.0208287	0.00490867	2.38395e-05	0.000103373	0.167568	Significant
X21739.7	GLCNE	GNE	0.00480689	0.00113415	2.44287e-05	0.000105863	0.171709	Significant
X5654.70	TMX3	TMX3	0.0218119	0.00514726	2.44481e-05	0.000105881	0.171846	Significant
X12532.28	UB2R1	CDC34	0.0140829	0.00332478	2.46616e-05	0.00010674	0.173346	Significant
X16768.3	PLAK	JUP	0.00766163	0.00180888	2.47082e-05	0.000106876	0.173674	Significant
X10738.11	fibulin 5	FBLN5	0.0235132	0.00555414	2.48953e-05	0.000107619	0.174989	Significant
X8786.6	F171B:ECD	FAM171B	0.0323464	0.00764243	2.499e-05	0.000107962	0.175655	Significant
X3461.58	PGCB	BCAN	0.0264031	0.00623831	2.50277e-05	0.000108059	0.175919	Significant
X16887.29	PTH2	PTRH2	0.004986	0.00117822	2.50728e-05	0.000108124	0.176237	Significant
X13632.10	Zyxin	ZYX	0.0182617	0.00431501	2.50735e-05	0.000108124	0.176241	Significant
X4158.54	uPA	PLAU	0.00437607	0.00103468	2.53683e-05	0.000109328	0.178314	Significant
X7773.20	KI2L2	KIR2DL2	-0.00492555	0.00116552	2.57245e-05	0.000110795	0.180817	Significant
X12783.29	HNRPM	HNRNPM	0.00896558	0.00212244	2.59757e-05	0.000111808	0.182583	Significant
X16807.35	TNNT3	TNNT3	-0.00705027	0.00166929	2.60492e-05	0.000112056	0.1831	Significant
X6260.14	Tenascin	TNC	0.0258919	0.00613242	2.61601e-05	0.000112464	0.183879	Significant
X14054.17	IL-15 Ra	IL15RA	0.0219456	0.00520218	2.65779e-05	0.000114191	0.186816	Significant
X7100.31	CD2	CD2	0.0136357	0.00323446	2.69389e-05	0.000115671	0.189354	Significant
X12649.80	Malate dehydrogenase 2	MDH2	0.0285563	0.00677635	2.71043e-05	0.00011631	0.190516	Significant
X18270.10	TAF10	TAF10	-0.00803916	0.00190975	2.7638e-05	0.000118528	0.194267	Significant
X22403.13	H2B1K	H2BC12	-0.0376129	0.00893766	2.77663e-05	0.000118955	0.195169	Significant
X8080.24	PSMP	MSMP	0.0420297	0.00998715	2.77713e-05	0.000118955	0.195204	Significant
X7812.11	calgranulin B	S100A9	-0.00884406	0.0021014	2.78112e-05	0.000119053	0.195485	Significant
X11185.145	GCH1	GCH1	-0.00328859	0.000781462	2.78322e-05	0.00011907	0.195633	Significant
X7146.5	PDIA4	PDIA4	0.00484927	0.0011526	2.79132e-05	0.000119344	0.196202	Significant
X14023.84	BSP	IBSP	0.0275787	0.00655577	2.8039e-05	0.000119809	0.197086	Significant
X9090.9	SYTL4:C2 1	SYTL4	-0.0113941	0.00270905	2.81256e-05	0.000120106	0.197695	Significant
X12956.40	KBP	KIFBP	-0.0142325	0.00338425	2.81697e-05	0.000120221	0.198005	Significant
X25087.11	DTNA	DTNA	0.00733017	0.00174516	2.87915e-05	0.000122759	0.202375	Significant
X2514.65	Ephrin-B3:ECD	EFNB3	0.0192302	0.0045786	2.8806e-05	0.000122759	0.202477	Significant
X9254.18	FCERA	FCER1A	-0.00637889	0.00151877	2.88167e-05	0.000122759	0.202552	Significant
X16831.7	DOK1	DOK1	-0.00590153	0.00140548	2.89582e-05	0.000123287	0.203547	Significant
X11425.31	RUFY1	RUFY1	0.00567885	0.00135251	2.89945e-05	0.000123335	0.203802	Significant
X16883.57	RAB4A	RAB4A	-0.0051764	0.00123291	2.90046e-05	0.000123335	0.203873	Significant
X19496.1	NPL	NPL	-0.00861875	0.002053	2.90938e-05	0.00012364	0.2045	Significant
X11441.11	PYGL	PYGL	-0.0445743	0.0106196	2.91706e-05	0.000123891	0.20504	Significant
X12571.14	ARL3	ARL3	0.00730407	0.00174172	2.96248e-05	0.000125744	0.208232	Significant
X20378.110	LZTL1	LZTFL1	-0.00917953	0.00218985	2.9875e-05	0.00012673	0.209992	Significant
X21708.149	FCGRN	FCGRT	0.0218333	0.00521708	3.07516e-05	0.00013037	0.216153	Significant
X7195.119	EPHA7	EPHA7	0.0130577	0.00312097	3.09011e-05	0.000130924	0.217204	Significant
X9115.78	ADEC1	ADAMDEC1	-0.00673008	0.00160876	3.09611e-05	0.0001311	0.217625	Significant
X12699.28	TCP-1-theta	CCT8	-0.0221562	0.00529684	3.10547e-05	0.000131417	0.218283	Significant
X10615.18	MYP0	MPZ	0.0107257	0.00256518	3.12724e-05	0.000132259	0.219814	Significant
X19360.22	LRRT1	LRRTM1	0.0303639	0.00726307	3.13383e-05	0.000132458	0.220277	Significant
X20968.22	EXOS5	EXOSC5	-0.00357152	0.000854429	3.14384e-05	0.000132801	0.22098	Significant
X19250.50	MYCBP	MYCBP	-0.00667019	0.00159669	3.17637e-05	0.000134094	0.223267	Significant
X21999.61	NUCB2	NUCB2	0.0114918	0.00275359	3.23348e-05	0.000136424	0.227282	Significant
X11266.8	SELPL:ECD	SELPLG	0.00661597	0.00158617	3.27178e-05	0.000137894	0.229974	Significant
X20211.75	GBP5	GBP5	-0.0077927	0.00186838	3.27227e-05	0.000137894	0.230008	Significant
X7054.87	CLC2D	CLEC2D	-0.00609468	0.00146173	3.29408e-05	0.00013873	0.231541	Significant
X15358.28	7B2	SCG5	0.0247254	0.00593127	3.29947e-05	0.000138874	0.23192	Significant
X25211.14	GBG12	GNG12	-0.00698101	0.00167499	3.31489e-05	0.000139439	0.233003	Significant
X25104.10	TF2L1	TFCP2L1	-0.00460702	0.00110643	3.36967e-05	0.000141603	0.236854	Significant
X13490.1	MPP6	MPP6	-0.00637793	0.00153167	3.3722e-05	0.000141603	0.237032	Significant
X12830.4	SAP18	SAP18	-0.00581361	0.00139628	3.37236e-05	0.000141603	0.237043	Significant
X7104.71	CABP7	CABP7	-0.0126677	0.00304296	3.39712e-05	0.000142558	0.238784	Significant
X17777.31	SDSL	SDSL	0.00758155	0.00182207	3.41209e-05	0.0001431	0.239836	Significant
X9897.9	MCM6	MCM6	0.00336852	0.000810108	3.45324e-05	0.00014474	0.242728	Significant
X22483.109	K2C71	KRT71	0.0117326	0.00282347	3.50012e-05	0.000146583	0.246024	Significant
X3028.36	Ck-b-8-1	CCL23	0.00507039	0.00122032	3.50139e-05	0.000146583	0.246112	Significant
X3486.58	b-ECGF	FGF1	-0.0155146	0.00373519	3.54036e-05	0.000148126	0.248852	Significant
X2774.10	IL-16	IL16	0.028766	0.00693629	3.61928e-05	0.000151338	0.254399	Significant
X24689.9	PTRF	CAVIN1	-0.0072456	0.0017469	3.62341e-05	0.000151421	0.254689	Significant
X14337.1	TPPC3	TRAPPC3	0.00627123	0.00151293	3.65319e-05	0.000152574	0.256782	Significant
X11232.46	Holo-TC I	TCN1	-0.00542584	0.00130992	3.70009e-05	0.000154441	0.260079	Significant
X22526.81	PDHB	PDHB	0.0135768	0.00327823	3.7163e-05	0.000155026	0.261219	Significant
X2603.61	B7	CD80	-0.00608561	0.00147014	3.74301e-05	0.000155988	0.263096	Significant
X13435.31	IL-20 Rb	IL20RB	0.00586285	0.00141612	3.7438e-05	0.000155988	0.263152	Significant
X10558.26	PCDH9	PCDH9	0.023327	0.00563736	3.76568e-05	0.000156807	0.26469	Significant
X24915.123	CAN13	CAPN13	0.0115477	0.00279095	3.77526e-05	0.000157112	0.265363	Significant
X11514.196	CD59	CD59	0.0166188	0.00401828	3.79983e-05	0.000158041	0.26709	Significant
X18381.16	ALDH-E2	ALDH2	-0.0204154	0.00493803	3.82928e-05	0.000159152	0.26916	Significant
X5268.49	MMP-16	MMP16	-0.0041898	0.0010133	3.83105e-05	0.000159152	0.269284	Significant
X5715.4	ABHEA	ABHD14A	0.0127238	0.0030807	3.8966e-05	0.000161779	0.273892	Significant
X8418.30	b-Catenin	CTNNB1	-0.00976592	0.0023651	3.91212e-05	0.000162303	0.274983	Significant
X15308.108	VWC2	VWC2	0.0217719	0.00527301	3.91384e-05	0.000162303	0.275104	Significant
X5364.7	SET	SET	0.019498	0.00472336	3.9303e-05	0.00016289	0.276261	Significant
X9841.197	Multifunctional protein ADE2	PAICS	-0.00580411	0.00140606	3.93453e-05	0.000162969	0.276558	Significant
X15365.41	BAI3	ADGRB3	0.0197956	0.00480087	4.00796e-05	0.000165913	0.28172	Significant
X2939.10	Artemin	ARTN	-0.00643735	0.00156144	4.02484e-05	0.000166513	0.282906	Significant
X16927.9	Coagulation factor XIII	F13A1|F13B	-0.0336174	0.00816387	4.10555e-05	0.000169752	0.288579	Significant
X16751.15	BNP	NPPB	0.00499153	0.00121184	4.11349e-05	0.000169981	0.289137	Significant
X9380.2	sPLA(2)-XIII	PLA2G12B	-0.0118078	0.0028685	4.13666e-05	0.000170838	0.290766	Significant
X24294.13	CTF8	CHTF8	-0.00622136	0.00151222	4.17324e-05	0.000172247	0.293337	Significant
X21403.39	TSC2	TSC2	-0.00550303	0.00133772	4.17813e-05	0.000172348	0.293681	Significant
X9343.16	IL-2 sRb	IL2RB	0.00615537	0.00149701	4.21902e-05	0.000173932	0.296555	Significant
X22950.6	BT3A3	BTN3A3	0.0103762	0.00252382	4.23117e-05	0.000174331	0.297409	Significant
X6617.12	FCRL6	FCRL6	-0.00653769	0.00159144	4.28134e-05	0.000176295	0.300935	Significant
X9229.9	CTRL	CTRL	-0.00783262	0.00190761	4.3249e-05	0.000177985	0.303998	Significant
X3078.1	PlGF	PGF	0.030653	0.00746796	4.35248e-05	0.000179015	0.305936	Significant
X24712.6	GTPBA	GTPBP10	-0.00849339	0.00206999	4.37737e-05	0.000179933	0.307685	Significant
X23588.9	HSDL2	HSDL2	0.017379	0.00423704	4.39757e-05	0.000180657	0.309105	Significant
X21793.4	FR1OP	CEP43	-0.011281	0.00275109	4.43327e-05	0.000182018	0.311615	Significant
X21457.141	CQ10A	COQ10A	-0.00795574	0.00194122	4.46214e-05	0.000183045	0.313644	Significant
X4807.13	CO8A1	COL8A1	-0.00331817	0.000809592	4.4635e-05	0.000183045	0.31374	Significant
X23245.5	SPC1L	SPATC1L	-0.0187888	0.00458595	4.50103e-05	0.000184467	0.316377	Significant
X3873.51	TMA	TPO	-0.00679607	0.00165915	4.50341e-05	0.000184467	0.316545	Significant
X4292.5	SNAA	NAPA	0.0358328	0.00875322	4.549e-05	0.000186225	0.319749	Significant
X23382.30	VCX3	VCX3A	-0.00728466	0.00177977	4.5627e-05	0.000186678	0.320712	Significant
X7915.31	APLP2	APLP2	0.0257204	0.00628427	4.56691e-05	0.000186741	0.321008	Significant
X8837.8	MFA3L	MFAP3L	-0.00405721	0.000991406	4.57783e-05	0.000187079	0.321775	Significant
X21754.5	ZRAN1	ZRANB1	-0.00395873	0.000967393	4.5809e-05	0.000187096	0.321991	Significant
X12625.138	KLHL7	KLHL7	-0.00587185	0.00143595	4.6476e-05	0.00018971	0.32668	Significant
X20454.24	SOSB2	NABP1	-0.00630901	0.00154342	4.66798e-05	0.000190431	0.328112	Significant
X2682.68	HSP 60	HSPD1	0.0364142	0.00891139	4.69475e-05	0.000191321	0.329994	Significant
X7228.2	SIA7F	ST6GALNAC6	0.00882899	0.00216065	4.69643e-05	0.000191321	0.330112	Significant
X16854.17	LSM4	LSM4	-0.00670071	0.00163984	4.69798e-05	0.000191321	0.330221	Significant
X11448.34	GALK1	GALK1	-0.0104123	0.00254824	4.71158e-05	0.000191765	0.331177	Significant
X18242.8	Sperm protein 17	SPA17	0.0036278	0.000888525	4.7697e-05	0.000194018	0.335262	Significant
X8329.166	Cadherin-12:CD	CDH12	0.00464687	0.00113813	4.77304e-05	0.000194041	0.335497	Significant
X10560.1	ITM2C:N-term	ITM2C	0.00988419	0.00242007	4.78567e-05	0.000194337	0.336384	Significant
X19275.68	IDH3G	IDH3G	-0.00518103	0.00126918	4.78586e-05	0.000194337	0.336398	Significant
X23696.256	TRM6	TRMT6	-0.00914624	0.00224124	4.80288e-05	0.000194916	0.337594	Significant
X2500.2	Angiopoietin-4	ANGPT4	-0.0062103	0.00152202	4.81546e-05	0.000195314	0.338478	Significant
X8601.167	sLRP1:CD	LRP1	-0.00499196	0.00122385	4.84329e-05	0.000196329	0.340435	Significant
X22548.18	RGS13	RGS13	-0.00935002	0.00229448	4.92935e-05	0.000199702	0.346484	Significant
X6604.59	CD031	NDNF	-0.00711709	0.00174742	4.97316e-05	0.000201292	0.349563	Significant
X8287.17	CLM2	CD300E	-0.00697472	0.00171247	4.97432e-05	0.000201292	0.349645	Significant
X21387.64	MEP1A	MEP1A	-0.0262278	0.00644226	5.00448e-05	0.000202395	0.351765	Significant
X2696.87	Persephin	PSPN	-0.00358294	0.000880085	5.00733e-05	0.000202395	0.351965	Significant
X3423.59	Chymase	CMA1	-0.00621397	0.00152759	5.07782e-05	0.000205126	0.35692	Significant
X8994.65	SLAMF8	SLAMF8	0.00445988	0.00109647	5.08648e-05	0.000205358	0.357529	Significant
X23029.3	SH3G3	SH3GL3	-0.00587822	0.00144518	5.09044e-05	0.0002054	0.357807	Significant
X19141.22	DAP1	DAP	-0.00616666	0.00151719	5.14801e-05	0.000207604	0.361854	Significant
X8953.47	HDGF	HDGF	-0.00727511	0.00179057	5.1842e-05	0.000208944	0.364398	Significant
X13976.9	ARHG1	ARHGEF1	-0.00498974	0.00122915	5.2576e-05	0.00021178	0.369556	Significant
X15414.316	LDHA	LDHA	-0.133886	0.0329841	5.27425e-05	0.000212329	0.370727	Significant
X6290.3	UTS2B	UTS2B	-0.00548933	0.00135295	5.31158e-05	0.00021371	0.373351	Significant
X11851.21	TREM2	TREM2	0.032364	0.00797802	5.32227e-05	0.000213972	0.374102	Significant
X17164.15	annexin IV	ANXA4	-0.00879602	0.00216831	5.3242e-05	0.000213972	0.374238	Significant
X8900.28	NEO1	NEO1	0.0156266	0.00385352	5.35475e-05	0.000215077	0.376385	Significant
X5028.59	sCD163	CD163	0.0206983	0.00510459	5.36404e-05	0.000215327	0.377038	Significant
X11378.37	KSYK:SH2, 1 and 2	SYK	-0.00636159	0.0015703	5.44723e-05	0.000218542	0.382886	Significant
X7008.13	F176C:CD	EVA1C	0.0070644	0.00174409	5.46716e-05	0.000219217	0.384287	Significant
X12618.50	Aldo-keto reductase 1C1	AKR1C1	-0.00589263	0.00145607	5.54812e-05	0.000222336	0.389977	Significant
X15669.7	BRAF1	BRAF	-0.00844149	0.00208652	5.57616e-05	0.000223332	0.391948	Significant
X5730.60	BRAK	CXCL14	-0.00570459	0.0014105	5.60587e-05	0.000224394	0.394036	Significant
X20586.18	CNTN3	CNTN3	0.0222808	0.00551039	5.62683e-05	0.000225105	0.39551	Significant
X13711.10	CLH1	CLTC	-0.00498718	0.00123351	5.63557e-05	0.000225327	0.396124	Significant
X8018.43	VSIG2	VSIG2	0.0128271	0.00317509	5.71402e-05	0.00022824	0.401638	Significant
X4122.12	discoidin domain receptor 1	DDR1	0.0246018	0.0060895	5.71494e-05	0.00022824	0.401703	Significant
X6536.54	LAML2	PLBD2	-0.00638697	0.00158145	5.74234e-05	0.000229205	0.403629	Significant
X5792.8	AFP	AFP	-0.00531512	0.00131645	5.76983e-05	0.000230171	0.405562	Significant
X21931.16	UB2L3/ PolyUbiquitin K48	UBE2L3|UBB	0.00447077	0.0011076	5.79824e-05	0.000231173	0.407558	Significant
X24179.48	PTER	PTER	-0.00958261	0.00237526	5.85386e-05	0.000233258	0.411468	Significant
X22073.47	AT5F1	ATP5PB	-0.00314612	0.000780142	5.88668e-05	0.000234433	0.413775	Significant
X13450.49	UBP8	USP8	-0.00552177	0.00137004	5.94589e-05	0.000236657	0.417937	Significant
X15594.47	HTRA1	HTRA1	0.0129477	0.00321426	5.99878e-05	0.000238627	0.421654	Significant
X9875.107	THOC1	THOC1	-0.00545899	0.00135563	6.03096e-05	0.000239687	0.423916	Significant
X5756.66	PAPP2	PAPPA2	-0.00654337	0.00162491	6.03225e-05	0.000239687	0.424007	Significant
X23374.42	NECA3	NECAB3	-0.00912358	0.00226578	6.05017e-05	0.000240264	0.425266	Significant
X5017.19	Peroxiredoxin-5	PRDX5	-0.00324882	0.000806963	6.05587e-05	0.000240354	0.425667	Significant
X19263.147	IF4E	EIF4E	-0.0427143	0.0106124	6.08378e-05	0.000241326	0.427629	Significant
X15370.5	BOLA1	BOLA1	0.019946	0.00495589	6.08986e-05	0.00024143	0.428056	Significant
X21397.21	PRTG	PRTG	0.0159529	0.00396644	6.15629e-05	0.000243927	0.432726	Significant
X18196.8	Afamin	AFM	-0.0342462	0.00851643	6.17693e-05	0.000244454	0.434176	Significant
X10647.18	ASCC1	ASCC1	0.0111863	0.00278178	6.17953e-05	0.000244454	0.434359	Significant
X23356.32	CCD24	CCDC24	-0.0227088	0.00564367	6.18081e-05	0.000244454	0.434449	Significant
X7959.34	CADH7	CDH7	0.0165695	0.00412077	6.18351e-05	0.000244454	0.434639	Significant
X19516.10	HMGA2	HMGA2	-0.00659237	0.00163995	6.21859e-05	0.000245703	0.437105	Significant
X20519.7	CD6	CD6	0.00457137	0.00113713	6.22439e-05	0.000245794	0.437513	Significant
X8428.102	NTRI	NTM	0.00737777	0.00183598	6.24831e-05	0.0002466	0.439194	Significant
X20991.2	LIMD2	LIMD2	-0.00587961	0.00146316	6.25189e-05	0.000246602	0.439445	Significant
X7956.11	MOS1	MICOS10	-0.0100453	0.00250002	6.25845e-05	0.000246723	0.439907	Significant
X3314.74	GFRa-1	GFRA1	0.0168025	0.00418224	6.2713e-05	0.000247091	0.44081	Significant
X19388.2	Cadherin-12:ECD	CDH12	0.0122088	0.00303905	6.28186e-05	0.000247368	0.441552	Significant
X18337.4	GMDS	GMDS	0.0078434	0.00195237	6.28789e-05	0.000247467	0.441976	Significant
X15503.15	Lefty-A	LEFTY2	0.0307332	0.00765248	6.3082e-05	0.000248127	0.443404	Significant
X7766.25	ZP4	ZP4	0.00864055	0.00215167	6.32241e-05	0.000248547	0.444402	Significant
X5825.49	IFN-g R1	IFNGR1	0.0119041	0.0029655	6.36048e-05	0.000249904	0.447078	Significant
X25473.62	FNTA	FNTA	0.0058473	0.00145693	6.38452e-05	0.000250708	0.448768	Significant
X21338.44	SIL1	SIL1	0.0111426	0.00277661	6.40686e-05	0.000251445	0.450338	Significant
X21210.33	DPOLB	POLB	-0.0062014	0.00154633	6.46324e-05	0.000253516	0.454301	Significant
X18859.7	4EBP3	EIF4EBP3	0.00513153	0.00128052	6.54836e-05	0.000256712	0.460284	Significant
X4900.8	C3a	C3	0.0500321	0.0124926	6.61763e-05	0.000259283	0.465153	Significant
X6441.62	ATS6	ADAMTS6	-0.00506844	0.00126591	6.64405e-05	0.000260173	0.46701	Significant
X7155.46	C4b-binding protein beta chain	C4BPB	-0.00836189	0.00208886	6.66264e-05	0.000260755	0.468317	Significant
X8348.4	EPHB2	EPHB2	0.0171124	0.0042762	6.69983e-05	0.000262065	0.470931	Significant
X24958.3	RFX5	RFX5	-0.00540495	0.00135072	6.70567e-05	0.000262148	0.471341	Significant
X13535.2	C43BP:PH domain	CERT1	-0.00526504	0.00131599	6.72465e-05	0.000262744	0.472676	Significant
X23336.2	KCNRG	KCNRG	-0.00856004	0.00213974	6.75204e-05	0.000263667	0.474601	Significant
X5658.64	coagulation factor XIII B	F13B	-0.028982	0.00724815	6.79558e-05	0.00026522	0.477662	Significant
X12014.19	PTPS	PTS	-0.00610826	0.00152797	6.81419e-05	0.000265799	0.478969	Significant
X5404.53	DR6	TNFRSF21	0.0123006	0.0030806	6.94867e-05	0.000270894	0.488422	Significant
X22792.21	SYWM	WARS2	-0.00687543	0.00172406	7.10854e-05	0.000276973	0.499659	Significant
X21373.8	QTRD1	QTRT2	0.0104905	0.00263045	7.1704e-05	0.000279229	0.504007	Significant
X10046.55	cIAP-1	BIRC2	0.00404231	0.00101391	7.19358e-05	0.000279976	0.505637	Significant
X22969.12	MCP-3	CCL7	-0.00668028	0.00167657	7.2033e-05	0.000280199	0.50632	Significant
X16551.14	STA5B	STAT5B	-0.00451047	0.00113236	7.23691e-05	0.000281351	0.508683	Significant
X10435.2	ASPG	AGA	-0.00516228	0.0012963	7.27055e-05	0.000282502	0.511047	Significant
X9025.5	AHSP	AHSP	0.0125943	0.00316306	7.28522e-05	0.000282916	0.512078	Significant
X9869.28	NF-kappa-B p105	NFKB1	-0.00530443	0.00133297	7.36922e-05	0.00028602	0.517983	Significant
X15372.43	BRD2	BRD2	-0.00613803	0.0015433	7.42215e-05	0.000287916	0.521703	Significant
X20401.19	BUD31	BUD31	-0.00495751	0.00124712	7.48259e-05	0.0002901	0.525951	Significant
X17756.69	DCTD	DCTD	0.00380115	0.000956464	7.51609e-05	0.000291238	0.528306	Significant
X7994.41	ERO1B	ERO1B	0.00564556	0.00142075	7.53108e-05	0.000291658	0.52936	Significant
X7894.155	FGF-3	FGF3	0.00297856	0.000749836	7.58006e-05	0.000293393	0.532802	Significant
X5612.16	HINT2	HINT2	-0.00317887	0.00080046	7.60412e-05	0.000294124	0.534494	Significant
X6444.15	PSG3	PSG3	0.00318579	0.000802166	7.60731e-05	0.000294124	0.534718	Significant
X6296.36	OIT3	OIT3	-0.0053577	0.0013493	7.62079e-05	0.000294483	0.535665	Significant
X16746.12	Activin B	INHBB	-0.00521858	0.00131508	7.71158e-05	0.000297799	0.542047	Significant
X25481.66	ATX10	ATXN10	-0.00732714	0.00184664	7.71507e-05	0.000297799	0.542292	Significant
X25209.15	ATNG	FXYD2	0.00612301	0.00154341	7.73674e-05	0.000298472	0.543816	Significant
X22113.2	COQ6	COQ6	0.0070084	0.00176668	7.74463e-05	0.000298612	0.54437	Significant
X6900.30	UB2J1	UBE2J1	-0.00449193	0.0011325	7.76545e-05	0.000299251	0.545833	Significant
X6941.11	SUMF1	SUMF1	-0.00425029	0.00107215	7.83149e-05	0.000301571	0.550475	Significant
X4224.7	HNRPQ	SYNCRIP	-0.00558011	0.00140767	7.83782e-05	0.000301571	0.550921	Significant
X25059.18	HDAC6	HDAC6	-0.00609525	0.00153764	7.83853e-05	0.000301571	0.550971	Significant
X24636.9	Dr1-associated corepressor	DRAP1	-0.00548723	0.00138438	7.84739e-05	0.000301747	0.551593	Significant
X12573.80	TRIM3	TRIM3	-0.00283679	0.000716512	8.00151e-05	0.000307505	0.562426	Significant
X16297.14	ROBO4	ROBO4	0.0101509	0.00256526	8.06487e-05	0.00030977	0.566879	Significant
X4394.71	FGF-8A	FGF8	-0.00330823	0.000836112	8.08252e-05	0.000310279	0.56812	Significant
X3299.29	Contactin-5	CNTN5	0.0166666	0.00421292	8.09793e-05	0.000310701	0.569204	Significant
X12490.92	LTOR3	LAMTOR3	0.0079921	0.00202037	8.11067e-05	0.00031102	0.570099	Significant
X9121.28	FUT2	FUT2	0.00441553	0.00111664	8.15755e-05	0.000312647	0.573394	Significant
X7096.30	RMD1	RMDN1	0.0281749	0.00712741	8.19786e-05	0.00031402	0.576227	Significant
X13503.19	PRAF3	ARL6IP5	-0.00526464	0.0013325	8.26872e-05	0.000316562	0.581208	Significant
X20954.27	LDOCL	RTL6	-0.00659298	0.00166885	8.28556e-05	0.000317034	0.582392	Significant
X7790.21	LIF	LIF	-0.0058396	0.00147829	8.29421e-05	0.000317193	0.583	Significant
X8038.41	NSDHL	NSDHL	-0.00514013	0.00130126	8.30613e-05	0.000317476	0.583838	Significant
X21949.4	AB1IP	APBB1IP	-0.00529445	0.00134088	8.35322e-05	0.000319102	0.587148	Significant
X9218.7	Fas, soluble	FAS	0.00436427	0.00110584	8.42682e-05	0.000321739	0.592322	Significant
X6473.55	PLUNC	BPIFA1	-0.00697005	0.00176611	8.43596e-05	0.000321913	0.592963	Significant
X21940.12	WN10B	WNT10B	-0.016795	0.00425926	8.56534e-05	0.000326673	0.602058	Significant
X3874.8	UB2L3	UBE2L3	-0.00688735	0.00174774	8.62875e-05	0.000328913	0.606515	Significant
X13694.24	TSLP R	CRLF2	-0.00347871	0.00088298	8.67021e-05	0.000330314	0.609429	Significant
X9769.48	DNER:ECD	DNER	0.0194731	0.00494487	8.72036e-05	0.000332004	0.612954	Significant
X24664.3	INM02	EMC10	0.0186608	0.00473873	8.72402e-05	0.000332004	0.613211	Significant
X21282.21	TNIP1	TNIP1	0.00397954	0.0010109	8.77568e-05	0.000333789	0.616842	Significant
X7696.3	NBR1	NBR1	0.00578617	0.00147078	8.86579e-05	0.000337034	0.623177	Significant
X21217.20	PHB2	PHB2	0.00678143	0.00172388	8.88194e-05	0.000337466	0.624311	Significant
X10889.2	MRAP2	MRAP2	-0.00702866	0.0017872	8.91701e-05	0.000338615	0.626777	Significant
X8957.72	XTP3B	ERLEC1	0.0134233	0.0034136	8.93083e-05	0.000338957	0.627748	Significant
X25225.14	FHL17	FTHL17	-0.00493618	0.0012556	8.96655e-05	0.000340129	0.630259	Significant
X20927.43	T2FB	GTF2F2	-0.00572704	0.00145707	8.99405e-05	0.000340988	0.632191	Significant
X2617.56	ERBB3	ERBB3	0.0239321	0.0060899	9.02144e-05	0.000341842	0.634117	Significant
X8219.14	ZG16	ZG16	-0.00586591	0.0014931	9.08569e-05	0.000344091	0.638633	Significant
X4132.27	FST	FST	-0.00547707	0.00139485	9.13794e-05	0.000345884	0.642306	Significant
X21260.74	RUXE	SNRPE	-0.00521599	0.00132852	9.16144e-05	0.000346586	0.643957	Significant
X7090.17	GALT1	GALNT1	0.0185691	0.00473509	9.32887e-05	0.000352731	0.655726	Significant
X4673.13	IL-6	IL6	-0.0131474	0.00335243	9.33872e-05	0.000352913	0.656419	Significant
X13104.32	EFNB1	EFNB1	0.015749	0.00401692	9.36455e-05	0.000353699	0.658234	Significant
X11138.16	RUNX3	RUNX3	-0.00531857	0.00135703	9.42357e-05	0.000355737	0.662383	Significant
X13094.75	RSPO3	RSPO3	0.0132876	0.00339073	9.4351e-05	0.000355834	0.663193	Significant
X13468.5	NEUL4	NEURL4	-0.0039241	0.00100133	9.43625e-05	0.000355834	0.663274	Significant
X9078.207	SNTB1	SNTB1	-0.00652123	0.00166421	9.45603e-05	0.000356388	0.664665	Significant
X3029.52	DC-SIGN	CD209	0.026909	0.00687235	9.56633e-05	0.000360352	0.672417	Significant
X10708.3	GON2	GNRH2	0.00897321	0.00229252	9.62719e-05	0.000362345	0.676695	Significant
X8976.13	B4GN1	B4GALNT1	0.00702693	0.00179534	9.62954e-05	0.000362345	0.676861	Significant
X18376.19	Myosin light chain 1	MYL3	-0.00530986	0.0013579	9.80269e-05	0.000368663	0.689031	Significant
X11158.40	BICR1	BICDL1	-0.0039341	0.00100672	9.87389e-05	0.000370992	0.694036	Significant
X24235.2	EHD1	EHD1	0.0185155	0.00473818	9.87518e-05	0.000370992	0.694127	Significant
X22098.10	CCYL1	CCNYL1	0.0067427	0.00172708	0.000100281	0.000376536	0.704875	Significant
X23291.18	PCLI1	PID1	-0.00557075	0.00142705	0.000100516	0.000377219	0.70653	Significant
X23702.98	SHKB1	SHKBP1	-0.00494299	0.00126649	0.000100795	0.000378063	0.70849	Significant
X25270.3	PML	PML	-0.00566488	0.00145189	0.000101235	0.000379511	0.711583	Significant
X25054.15	PRP19	PRPF19	-0.00418248	0.00107245	0.000101937	0.000381938	0.716516	Significant
X3082.9	ULBP-2	ULBP2	0.00348675	0.000894114	0.000102201	0.00038271	0.718372	Significant
X9511.61	NXPH2	NXPH2	0.0223449	0.00573069	0.000102252	0.00038271	0.718729	Significant
X10700.10	IGS11:CD	IGSF11	0.00608564	0.00156117	0.000102872	0.000384827	0.72309	Significant
X6326.20	BMP-4	BMP4	-0.00590858	0.00151605	0.000103082	0.000385406	0.724563	Significant
X12846.3	FBXL5	FBXL5	0.00421761	0.00108239	0.000103616	0.000387195	0.728314	Significant
X9747.48	MARK3	MARK3	0.00791455	0.00203186	0.000103944	0.000388215	0.73062	Significant
X19446.1	GMPR2	GMPR2	-0.00942095	0.00241915	0.000104429	0.000389821	0.734032	Significant
X13747.9	Carbonic anhydrase 6	CA6	-0.0114818	0.0029486	0.000104593	0.000390225	0.735185	Significant
X6904.14	LRRT2	LRRTM2	0.0218252	0.00560592	0.000104727	0.000390517	0.736125	Significant
X3902.21	SKP1	SKP1	-0.00645326	0.00165759	0.000104816	0.000390642	0.736751	Significant
X25115.21	FHOD1	FHOD1	-0.00456386	0.00117236	0.000104952	0.000390942	0.737707	Significant
X24253.5	ERF3B	GSPT2	-0.00490989	0.00126146	0.000105277	0.000391946	0.739994	Significant
X23659.2	BZW2	BZW2	-0.00898888	0.00231	0.000105603	0.00039295	0.742282	Significant
X2418.55	Apo E	APOE	0.00824861	0.00212097	0.000106622	0.000396533	0.749448	Significant
X2632.5	IL-12 Rb1	IL12RB1	-0.00571519	0.00146969	0.000106679	0.000396534	0.749847	Significant
X15534.26	Malate dehydrogenase 2	MDH2	0.0275433	0.00708376	0.000106936	0.000397281	0.751655	Significant
X18324.61	SUOX	SUOX	0.0128402	0.00330513	0.000108386	0.000402436	0.761848	Significant
X8464.31	RSPO4	RSPO4	0.00651905	0.00167806	0.000108439	0.000402436	0.762214	Significant
X25235.2	DPH7	DPH7	0.00282269	0.000727138	0.00010977	0.000407163	0.771573	Significant
X25274.2	ANKR2	ANKRD2	-0.011207	0.00288822	0.000110947	0.000411313	0.779849	Significant
X10817.26	TO20L	TOMM20L	-0.00762916	0.00196773	0.000111848	0.000414435	0.786183	Significant
X7156.2	FUT10	FUT10	0.0275498	0.00710722	0.00011219	0.00041548	0.788581	Significant
X5581.28	FGL1	FGL1	0.0391114	0.0100951	0.000113236	0.000419135	0.795937	Significant
X11275.94	LRP1B	LRP1B	0.00483388	0.00124795	0.000113537	0.000419851	0.798049	Significant
X20584.4	nectin-1 gamma:ECD	NECTIN1	0.0203824	0.00526224	0.000113549	0.000419851	0.798137	Significant
X11333.82	RHG25	ARHGAP25	0.0112651	0.00290892	0.000113881	0.000420857	0.80047	Significant
X11208.15	NAGPA	NAGPA	0.0175929	0.00454331	0.000114047	0.000421247	0.801634	Significant
X10605.22	APMAP	APMAP	0.00884249	0.0022858	0.000115907	0.000427894	0.81471	Significant
X21833.6	sirtuin	SIRT6	-0.00938894	0.00242947	0.000117886	0.000434971	0.828619	Significant
X22777.46	SKP2	SKP2	-0.00487572	0.00126176	0.00011804	0.000435148	0.829705	Significant
X21799.15	HOME3	HOMER3	-0.00896204	0.00231934	0.00011809	0.000435148	0.830052	Significant
X12712.9	HM20A	HMG20A	-0.00303739	0.000786098	0.00011812	0.000435148	0.830263	Significant
X7136.107	Hemoglobin epsilon chain	HBE1	-0.0351112	0.00908973	0.000118506	0.000436342	0.832977	Significant
X17152.10	KI2S4	KIR2DS4	-0.00333298	0.000862822	0.000118612	0.000436503	0.833721	Significant
X9786.310	IEX1	IER3	-0.00609468	0.00157869	0.000119641	0.000440061	0.840956	Significant
X24055.44	CSTF1	CSTF1	-0.00894678	0.00231883	0.000120793	0.000444047	0.849057	Significant
X8002.27	Spinesin	TMPRSS5	0.0263545	0.00683127	0.000120851	0.000444047	0.849461	Significant
X17843.30	PPCS	PPCS	-0.00767951	0.0019908	0.000121126	0.000444824	0.851393	Significant
X13735.1	RPGP1	RAP1GAP	0.00431323	0.00111833	0.000121406	0.000445622	0.853366	Significant
X21227.18	SULT 1A1*2	SULT1A1	-0.00443829	0.00115261	0.000124455	0.000456574	0.874796	Significant
X10756.34	UCN3	UCN3	0.0103437	0.00268862	0.000126546	0.000464001	0.889489	Significant
X17726.3	SAR1A	SAR1A	-0.00607952	0.00158079	0.000126902	0.000465066	0.891996	Significant
X23601.43	ACO12	ACOT12	-0.00757791	0.00197057	0.000127073	0.000465447	0.893194	Significant
X22091.14	BUP1	UPB1	0.00380764	0.000990545	0.000127943	0.000468375	0.899314	Significant
X22824.53	VATC2	ATP6V1C2	0.0132166	0.00343848	0.000128005	0.000468375	0.899748	Significant
X21182.8	SEN15	TSEN15	0.00411691	0.00107129	0.000128492	0.000469913	0.903173	Significant
X14670.1	SKIL	SKIL	0.00916487	0.00238622	0.000129647	0.000473773	0.911291	Significant
X17761.2	NUDT5	NUDT5	0.0142957	0.00372206	0.000129683	0.000473773	0.911539	Significant
X20535.68	I17RE	IL17RE	-0.0052807	0.00137576	0.00013081	0.000477643	0.919463	Significant
X6352.8	INSRR	INSRR	0.0133184	0.00347106	0.000131499	0.000479911	0.924309	Significant
X25105.87	EIF2A	EIF2A	-0.00797847	0.00207967	0.000131848	0.000480934	0.92676	Significant
X23568.41	MEIS2	MEIS2	0.00337367	0.000879828	0.000132893	0.000484493	0.934102	Significant
X17675.17	ACO13	ACOT13	-0.0131368	0.00342659	0.000133348	0.000485901	0.937303	Significant
X3081.70	ULBP-1	ULBP1	-0.00571577	0.00149116	0.00013355	0.000486384	0.938721	Significant
X24307.22	KDM8	KDM8	-0.00573991	0.001498	0.000134353	0.000489058	0.944371	Significant
X5738.25	Tenascin	TNC	0.0220858	0.00576492	0.000134675	0.000489975	0.946631	Significant
X13405.61	ISK2	SPINK2	0.0198046	0.00517007	0.000135107	0.000491292	0.949668	Significant
X9864.38	TTC1	TTC1	0.0275735	0.00720032	0.000135532	0.000492583	0.952656	Significant
X3026.5	Calpastatin	CAST	0.0122267	0.00319399	0.00013643	0.00049559	0.958967	Significant
X8094.20	CISD2	CISD2	-0.00531473	0.00138854	0.000136534	0.000495711	0.959697	Significant
X3344.60	Antithrombin III	SERPINC1	-0.0033901	0.000886054	0.000137454	0.000498764	0.966165	Significant
X13930.3	ABC3G	APOBEC3G	-0.0041976	0.00109718	0.000137517	0.000498764	0.966604	Significant
X16300.4	TREM2	TREM2	0.0312913	0.00818022	0.00013785	0.000499714	0.968946	Significant
X19111.10	UBC12	UBE2M	0.00610166	0.00159476	0.000137958	0.000499849	0.969706	Significant
X5691.2	CRLD2	CRISPLD2	-0.00519945	0.00135977	0.000138668	0.000502162	0.974696	Significant
X9316.67	WFDC1	WFDC1	0.033943	0.00888845	0.000141478	0.000512075	0.99445	Significant
X7879.12	Cytochrome P450 3A4	CYP3A4	-0.00285855	0.000749051	0.000142956	0.000517156	1	Significant
X9993.11	ZN264	ZNF264	-0.0059794	0.00156712	0.00014344	0.000518304	1	Significant
X9444.70	DGCR6	DGCR6	-0.00368013	0.000964563	0.000143454	0.000518304	1	Significant
X13682.47	M-CSF R	CSF1R	0.0105283	0.00275952	0.000143494	0.000518304	1	Significant
X23660.112	KLH41	KLHL41	-0.0130318	0.00341798	0.000145453	0.000525111	1	Significant
X14009.65	TNFAIP3	TNFAIP3	-0.00379036	0.000994585	0.000145923	0.000526537	1	Significant
X17794.6	Phosphomannomutase 2	PMM2	-0.0218416	0.00573197	0.000146239	0.000527404	1	Significant
X19372.7	MDGA2	MDGA2	0.022102	0.00580145	0.000146645	0.000528599	1	Significant
X24892.8	SHP1L	SHCBP1L	0.00593814	0.00155898	0.000147492	0.000531379	1	Significant
X18192.69	MAGE-5	MAGEA5	-0.00759923	0.00199544	0.000147667	0.000531736	1	Significant
X12713.365	RGS19	RGS19	-0.00657725	0.00172788	0.0001486	0.000534824	1	Significant
X6388.21	CC126	CCDC126	0.00332208	0.000873145	0.00014972	0.000538578	1	Significant
X22796.17	TADA1	TADA1	-0.00807947	0.00212506	0.000151304	0.000543997	1	Significant
X7152.5	TIMD3	HAVCR2	0.0210369	0.00553413	0.000151661	0.000545003	1	Significant
X9310.2	CD8B	CD8B	-0.00592555	0.00155953	0.000152739	0.000548595	1	Significant
X6605.17	IGFALS	IGFALS	-0.0289394	0.00761805	0.000153292	0.000550302	1	Significant
X12558.3	UBS3B	UBASH3B	-0.00629661	0.00165877	0.000155036	0.000556277	1	Significant
X4866.59	TrkB	NTRK2	0.0210495	0.00554594	0.000155211	0.000556623	1	Significant
X3024.18	a2-Antiplasmin	SERPINF2	-0.0304681	0.00803267	0.000156774	0.00056194	1	Significant
X5457.5	COLEC12	COLEC12	0.0144528	0.00381049	0.000156854	0.00056194	1	Significant
X21957.12	BCAP	PIK3AP1	-0.00271482	0.000716132	0.00015808	0.000566043	1	Significant
X15387.44	Neuropilin-2	NRP2	0.0141914	0.00374651	0.000159972	0.000572528	1	Significant
X13378.80	YD286	C5orf63	-0.00336028	0.0008878	0.00016218	0.000580136	1	Significant
X20937.43	NEP1	EMG1	-0.00558365	0.00147575	0.000162728	0.000581798	1	Significant
X24967.4	PCDH1	PCDH1	0.0140656	0.00371965	0.000164231	0.000586873	1	Significant
X17327.3	CNPY3	CNPY3	0.0140738	0.00372391	0.000166033	0.000593011	1	Significant
X4428.1	CHST2	CHST2	-0.00602541	0.00159477	0.00016621	0.000593343	1	Significant
X19188.21	NAP2L	NAP1L4	-0.0381057	0.0100874	0.000166838	0.000595283	1	Significant
X5008.51	Mn SOD	SOD2	0.0108482	0.00287234	0.000167167	0.000596154	1	Significant
X9887.40	RBBP6	RBBP6	-0.00335087	0.000887328	0.000167542	0.000597187	1	Significant
X2685.21	IGFBP-5	IGFBP5	0.0110689	0.00293185	0.000168137	0.000599003	1	Significant
X16823.75	APOL3	APOL3	-0.00631035	0.00167313	0.000170688	0.000607784	1	Significant
X14283.12	RAB14	RAB14	0.0158891	0.00421584	0.000172496	0.0006139	1	Significant
X12650.43	GNAI3	GNAI3	-0.00830393	0.00220228	0.00017258	0.0006139	1	Significant
X13519.112	ARHGP	ARHGEF25	0.00366245	0.00097217	0.000173599	0.00061721	1	Significant
X4775.34	Gelsolin	GSN	0.0160808	0.00426881	0.000173759	0.000617467	1	Significant
X14692.3	ZN276	ZNF276	-0.00772245	0.00205016	0.000174007	0.000618036	1	Significant
X15503.20	Lefty-A	LEFTY2	0.0242008	0.00642546	0.00017417	0.000618305	1	Significant
X2575.5	Leptin	LEP	-0.011784	0.00312866	0.000174274	0.000618361	1	Significant
X5202.4	PPID	PPID	-0.00435386	0.00115606	0.000174471	0.000618748	1	Significant
X21433.3	BT3A2	BTN3A2	0.0343166	0.00911563	0.000175652	0.00062262	1	Significant
X19631.13	Kininostatin	KNG1	0.0193414	0.00513995	0.000177011	0.000627121	1	Significant
X9178.30	NEUREGULIN-1	NRG1	0.00629593	0.00167393	0.000177872	0.000629856	1	Significant
X9002.36	SPA11	SERPINA11	-0.00603557	0.00160517	0.000178819	0.000632889	1	Significant
X23541.61	CLYBL	CLYBL	-0.00688525	0.00183212	0.000180024	0.000636833	1	Significant
X18253.8	SSB	SSBP1	-0.00603742	0.00160652	0.000180183	0.000637077	1	Significant
X15339.32	COF2	CFL2	0.0394869	0.010517	0.000182576	0.000645212	1	Significant
X2616.23	ERBB2	ERBB2	-0.00522113	0.00139144	0.00018415	0.000650448	1	Significant
X8407.84	NOTC2	NOTCH2	0.0184197	0.00490743	0.000184957	0.00065297	1	Significant
X16610.13	LRP10	LRP10	0.0141028	0.00376042	0.000185627	0.000655005	1	Significant
X17785.11	RCL	DNPH1	-0.00524122	0.00139928	0.000189169	0.00066717	1	Significant
X24922.19	NHLC2	NHLRC2	-0.00470306	0.00125605	0.0001901	0.000670118	1	Significant
X13992.12	NSF	NSF	0.0232416	0.00620829	0.000190601	0.000671548	1	Significant
X15300.66	CC134	CCDC134	0.0195647	0.00522658	0.000190791	0.000671878	1	Significant
X12662.82	ECH1	ECH1	0.00326027	0.000870965	0.000190931	0.000672036	1	Significant
X7995.16	VWC2L	None	0.0105134	0.00280947	0.000191766	0.000674321	1	Significant
[truncated: 5,031 more rows]

## Sheet: ST2_Replication_DAA
Supplementary Table 2: Differential Abundance Analysis of proteins passing signifiance threshold (FDR < 0.05) in the discovery cohort.
Analyte	Target	EntrezGeneSymbol	Estimate	Standard_error	Pvalue	FDR	bonferroni	diffexpressed
X5694.57	SMOC1	SMOC1	0.194839	0.00789965	7.26063497970189e-91	1.29420818513186e-87	2.58841637026372e-87	Significant
X4179.57	14-3-3 protein gamma	YWHAG	0.248415	0.00940613	6.17828436084429e-100	2.20255837464099e-96	2.20255837464099e-96	Significant
X12853.112	TMOD2	TMOD2	0.0481078	0.00246823	1.0742913750051e-64	2.94603750145629e-62	3.82984875189318e-61	Significant
X12414.31	14-3-3 protein beta/alpha	YWHAB	0.167435	0.00748475	2.39520784134237e-79	2.13472898859639e-76	8.53891595438555e-76	Significant
X15545.13	Calcineurin B a	PPP3R1	0.121535	0.00585037	4.84883523967906e-71	2.16076220368198e-68	1.72860976294558e-67	Significant
X13118.5	SMOC1	SMOC1	0.113203	0.00533684	2.37736318283351e-73	1.41254995780024e-70	8.47529974680146e-70	Significant
X12861.13	TMOD3	TMOD3	0.121322	0.00618911	3.1401915346312e-65	1.0177075291782e-62	1.11947828209602e-61	Significant
X19620.16	DLG2	DLG2	0.166348	0.00836621	1.21888591010182e-66	4.34532826951299e-64	4.34532826951299e-63	Significant
X5858.6	14-3-3 protein zeta/delta	YWHAZ	0.143829	0.00597695	5.98010543900269e-88	7.10635863001486e-85	2.13190758900446e-84	Significant
X14157.21	14-3-3E	YWHAE	0.124871	0.00582198	1.89347171754088e-74	1.35004533460665e-71	6.75022667303324e-71	Significant
X16885.49	MARE3	MAPRE3	0.120235	0.00630865	1.94998763596198e-62	4.63447061480297e-60	6.95170592220446e-59	Significant
X25219.17	VATF	ATP6V1F	0.0898881	0.0050874	1.9665711659722e-55	2.92117758612121e-53	7.01082620669089e-52	Significant
X19229.92	HOME1	HOMER1	0.057481	0.00330871	1.00414268459075e-53	1.05287313840177e-51	3.57976867056602e-50	Significant
X15474.7	PIN1	PIN1	0.0808709	0.00411671	8.06905759524707e-65	2.39718252725465e-62	2.87661903270558e-61	Significant
X22430.15	CHIN	CHN1	0.072415	0.00381923	1.47450727565064e-61	2.92034357649696e-59	5.25661843769453e-58	Significant
X24717.26	PTPA	PTPA	0.159101	0.00838608	9.74689428076714e-62	2.09943462538732e-59	3.47476781109349e-58	Significant
X14675.20	IF4B	EIF4B	0.0559003	0.00287251	1.15017648533566e-63	2.92884226444402e-61	4.10037917022163e-60	Significant
X21140.19	CAMLG	CAMLG	0.0388002	0.00279802	1.57972294036369e-37	5.46768182756947e-36	5.63171228239655e-34	Significant
X17706.4	PPR1A	PPP1R1A	0.0871548	0.00607286	8.61738238107165e-40	3.16711012252788e-38	3.07209681885204e-36	Significant
X14156.33	14-3-3 protein beta/alpha	YWHAB	0.131006	0.00652231	9.63586265779924e-68	3.81687226389492e-65	3.43518503750543e-64	Significant
X22968.9	GGE2D	GAGE2D	0.0837005	0.00447935	2.7942412758266e-60	5.24287902543254e-58	9.96147014832183e-57	Significant
X24637.3	TCAL5	TCEAL5	0.148387	0.00846169	6.6580037156005e-55	9.12914740235222e-53	2.37357832461158e-51	Significant
X18930.28	SLIT2	SLIT2	0.150181	0.0083128	1.45954036822276e-57	2.26228757074528e-55	5.20326141271414e-54	Significant
X23677.30	SPN90	NCKIPSD	0.0428548	0.00255266	3.71365642603545e-51	3.22906955093082e-49	1.32391851588164e-47	Significant
X4903.72	Calcineurin	PPP3CA|PPP3R1	0.234675	0.0110916	4.45604499730743e-73	2.269400059343e-70	1.5885800415401e-69	Significant
X20956.13	PFD4	PFDN4	0.0446022	0.002721	3.77648157856867e-49	2.92677322339072e-47	1.34631568275973e-45	Significant
X18303.39	NEUG	NRGN	0.218677	0.0119663	1.12664540907052e-58	1.82567767424382e-56	4.0164908833364e-55	Significant
X8901.40	14-3-3 protein gamma	YWHAG	0.166039	0.00878207	1.00113292094206e-61	2.09943462538732e-59	3.56903886315844e-58	Significant
X15325.14	NEUM	GAP43	0.182725	0.0103635	2.08556860171356e-55	2.97402082604354e-53	7.43505206510884e-52	Significant
X10900.272	STMN2	STMN2	0.136223	0.00802083	3.22786816254801e-52	3.02824999986412e-50	1.15073499994837e-48	Significant
X3905.62	UBE2N	UBE2N	0.104581	0.00680073	1.59488001806001e-44	9.23354451920019e-43	5.68574726438394e-41	Significant
X21667.57	PDE1B	PDE1B	0.0770055	0.00507036	1.16089514482144e-43	6.17700177804244e-42	4.13859119128843e-40	Significant
X21173.25	ELAV2	ELAVL2	0.106653	0.00632337	1.33770789792989e-51	1.22280221951796e-49	4.76892865612006e-48	Significant
X20197.14	VISL1	VSNL1	0.135229	0.007948	1.95897088287609e-52	1.93992533262591e-50	6.98373119745326e-49	Significant
X23528.199	PHIPL	PHYHIPL	0.145334	0.00839677	8.24338149133491e-54	9.1836421926903e-52	2.9387655016609e-50	Significant
X19113.66	SH3L2	SH3BGRL2	0.150384	0.00900751	7.08336845354508e-51	6.012430604021e-49	2.52522085368882e-47	Significant
X11354.21	Phospholipase C-beta-1	PLCB1	0.188766	0.0109103	9.66447742617771e-54	1.0440564249795e-51	3.44538620243235e-50	Significant
X19112.2	TCAL3	TCEAL3	0.0469686	0.00289229	1.854278094482e-48	1.32210028136567e-46	6.61050140682833e-45	Significant
X13242.134	SHAN3	SHANK3	0.0768615	0.00490742	6.78138012254479e-46	4.31707502444146e-44	2.41756201368722e-42	Significant
X8358.30	Peroxiredoxin-3	PRDX3	0.106463	0.00654908	1.00785143803435e-48	7.33263342161726e-47	3.59299037659246e-45	Significant
X21747.8	UBE2N/UB2V1 Complex	UBE2N|UBE2V1	0.138121	0.00911795	1.62230424759743e-43	8.50516859218359e-42	5.78351464268484e-40	Significant
X13522.20	VISL1	VSNL1	0.0865782	0.00552186	5.47597783957418e-46	3.54942927237854e-44	1.9521860998082e-42	Significant
X22037.47	EFHD2	EFHD2	0.0959566	0.00624677	1.60583382942612e-44	9.23354451920019e-43	5.72479760190412e-41	Significant
X17781.191	MLP3A	MAP1LC3A	0.10825	0.00644298	2.18818177680795e-51	1.95021700858009e-49	7.80086803432034e-48	Significant
X9099.19	SYT5	SYT5	0.107908	0.00617341	1.56729183453124e-54	2.06940570003847e-52	5.58739539010387e-51	Significant
X17704.74	HS105	HSPH1	0.0234966	0.00193456	3.07644943938752e-30	6.30318520196351e-29	1.09675422514165e-26	Significant
X12517.52	TFAR19	PDCD5	0.124584	0.00783832	4.50043434483063e-47	3.02717895081532e-45	1.60440484393212e-43	Significant
X11476.43	VPS4A	VPS4A	0.041677	0.00244519	3.16376714585336e-52	3.02824999986412e-50	1.12788298749672e-48	Significant
X11557.3	SMUF1	SMURF1	0.0359697	0.00237958	2.86599182074089e-43	1.39962477273168e-41	1.02172608409413e-39	Significant
X8070.88	DLG4	DLG4	0.0528317	0.00333206	9.79006593840318e-47	6.46325649451988e-45	3.49015850704073e-43	Significant
X15612.5	LIN7B	LIN7B	0.0737778	0.00399306	1.95974280469335e-59	3.4932415493659e-57	6.98648309873179e-56	Significant
X4707.50	14-3-3 eta	YWHAH	0.154455	0.00887479	2.94845019375541e-54	3.39071772281872e-52	1.0511224940738e-50	Significant
X21756.5	UBE2N/UBE2V2 Complex	UBE2N|UBE2V2	0.12919	0.00870035	4.3874260984743e-42	1.90746024890986e-40	1.56411740410609e-38	Significant
X12358.6	IGBP1	IGBP1	0.0505165	0.00330598	1.09451772580288e-43	6.00300875767272e-42	3.90195569248727e-40	Significant
X17367.5	Stathmin	STMN1	0.130939	0.00803153	6.02021114294841e-49	4.56639419672576e-47	2.14620527246111e-45	Significant
X8300.82	PEX14:N-term	PEX14	0.0623603	0.0042771	9.65079584406657e-41	3.8227874648997e-39	3.44050871840973e-37	Significant
X19196.73	HOP	HOPX	0.0804926	0.00537597	1.42837092381831e-42	6.44574980178769e-41	5.09214234341227e-39	Significant
X19290.5	HPRT	HPRT1	0.175627	0.00960458	1.09253825536854e-58	1.82567767424382e-56	3.89489888038885e-55	Significant
X3503.4	Integrin a1b1	ITGA1|ITGB1	0.166479	0.0135194	9.32972440548092e-31	2.00364262081563e-29	3.32604675055395e-27	Significant
X19267.14	GLO2	HAGH	0.132405	0.00775622	1.91720822009608e-52	1.93992533262591e-50	6.83484730464252e-49	Significant
X24474.12	TTC9A	TTC9	0.0616721	0.00511435	8.32699582289003e-30	1.64920778381128e-28	2.9685740108603e-26	Significant
X13967.14	Thioredoxin reductase 1	TXNRD1	0.124017	0.00711324	1.68393416601963e-54	2.14400903637856e-52	6.00322530185998e-51	Significant
X24908.19	AMPH	AMPH	0.147674	0.00907178	7.11347560774813e-49	5.28323761283793e-47	2.53595405416221e-45	Significant
X11214.40	DNJB9	DNAJB9	0.107227	0.00761331	1.35624575004045e-38	4.8350160988942e-37	4.8350160988942e-35	Significant
X17156.72	DCAK1	DCLK1	0.162317	0.00974015	9.59959375970478e-51	7.95873296589478e-49	3.42225517533475e-47	Significant
X12796.44	NUDT3	NUDT3	0.0542968	0.00443552	1.71386559866148e-30	3.59407697601657e-29	6.10993085922818e-27	Significant
X9169.14	SUMO3	SUMO3	0.113738	0.0073662	6.61089414681105e-45	4.06342028161748e-43	2.35678376333814e-41	Significant
X9900.36	NFH	NEFH	0.101734	0.00688662	8.6428594912647e-42	3.66807072456651e-40	3.08117940863587e-38	Significant
X25276.32	RABL6	RABL6	0.0845214	0.00530578	4.08075379121318e-47	2.79767062801442e-45	1.4547887265675e-43	Significant
X3351.1	CAMK2B	CAMK2B	0.0361741	0.00308029	1.91850947151657e-28	3.54377526733501e-27	6.83948626595657e-25	Significant
X12499.108	SH3G2	SH3GL2	0.0650058	0.00596189	4.10020661840047e-25	6.64419845208985e-24	1.46172365945977e-21	Significant
X14623.26	SUMO3	SUMO3	0.104527	0.00680681	1.7392005407635e-44	9.84166655209822e-43	6.20024992782188e-41	Significant
X25285.14	KBTBB	KBTBD11	0.0434167	0.00383276	1.18955331825911e-26	2.07880273509496e-25	4.24075757959373e-23	Significant
X21351.8	Glycyl t-RNA synthetase	GARS1	0.12428	0.00828807	8.33990275987468e-43	3.912072807757e-41	2.97317533389532e-39	Significant
X23546.9	HAGHL	HAGHL	0.0615792	0.00409285	6.06358721850285e-43	2.88222512452835e-41	2.16166884339627e-39	Significant
X9816.37	ISOC1	ISOC1	0.0292986	0.00212119	3.59932532596902e-37	1.17721053092473e-35	1.28315947870796e-33	Significant
X9877.28	CRKL	CRKL	0.0910706	0.00625763	8.54522330921395e-41	3.42289001093795e-39	3.04637210973477e-37	Significant
X17721.82	GAS7	GAS7	0.0379593	0.00242837	1.90804959934518e-45	1.1933678634501e-43	6.80219682166557e-42	Significant
X18226.148	COX5A	COX5A	0.0661844	0.00506326	3.83585051432457e-34	1.04387840332573e-32	1.36748070835671e-30	Significant
X9126.171	NT5D3	NT5DC3	0.0765175	0.00612177	1.16602736253224e-31	2.66467150476118e-30	4.15688754742744e-28	Significant
X12661.44	GBRL1	GABARAPL1	0.0959049	0.00657938	6.7002508152481e-41	2.71436297231358e-39	2.38863941563595e-37	Significant
X23327.1	BORC5	BORCS5	0.0347405	0.00336584	6.25887626219661e-23	8.96100155611683e-22	2.23128938747309e-19	Significant
X17775.8	TAGL3	TAGLN3	0.140854	0.00943531	1.48595167308113e-42	6.62177214316778e-41	5.29741771453423e-39	Significant
X17757.86	CAB39	CAB39	0.110535	0.0083289	5.25781479630864e-35	1.47591415345199e-33	1.87441097488403e-31	Significant
X11293.14	LRRN1:CD	LRRN1	0.312769	0.0188668	2.51779232659306e-50	2.03998401006915e-48	8.97592964430426e-47	Significant
X25912.131	FK506 binding protein 1A	FKBP1A	0.0856211	0.00926761	5.54589865693685e-19	6.1401020844658e-18	1.97711287119799e-15	Significant
X3872.2	TCTP	TPT1	0.0886227	0.00631133	1.80133438440335e-38	6.35817532712668e-37	6.42175708039794e-35	Significant
X17735.130	GBRAP	GABARAP	0.0907837	0.00638862	3.05645710947426e-39	1.11186424441589e-37	1.08962695952757e-35	Significant
X4272.46	PHI	GPI	0.153733	0.00882786	1.94237633498445e-54	2.38778332214468e-52	6.92457163421956e-51	Significant
X4276.10	prostatic binding protein	PEBP1	0.0817945	0.00541381	2.28626948130445e-43	1.16436438583577e-41	8.15055070085037e-40	Significant
X5476.66	PKC-G	PRKCG	0.118504	0.00812105	5.15616777976783e-41	2.11284346377843e-39	1.83817381348723e-37	Significant
X9934.29	PIPNA	PITPNA	0.0795517	0.00752557	6.95244528494451e-24	1.05470074216286e-22	2.47854674408272e-20	Significant
X21889.2	CG024	GGCT	0.0635105	0.00417986	1.13984854144827e-43	6.15690916706528e-42	4.06356005026308e-40	Significant
X21747.114	UBE2N/UB2V1 Complex	UBE2N|UBE2V1	0.124527	0.00917491	2.30022423545181e-36	7.06922362016009e-35	8.2002993993857e-33	Significant
X14066.49	MAGI2	MAGI2	0.098209	0.00710451	1.75716944605919e-37	5.96600864304858e-36	6.26430907520101e-34	Significant
X21206.218	HAX1	HAX1	0.148618	0.00853894	2.35792564575068e-54	2.80200164236706e-52	8.40600492710117e-51	Significant
X7788.1	CF6	ATP5PF	0.0282235	0.00404905	9.88138658814304e-12	6.33581711991546e-11	3.52271431867299e-08	Significant
X23387.18	TIPRL	TIPRL	0.128765	0.0106361	5.80172749878305e-30	1.1554837169364e-28	2.06831585331616e-26	Significant
X22782.80	SPC25	SPC25	0.476989	0.02911	1.89425429877125e-49	1.50067035002656e-47	6.75301657511951e-46	Significant
X13482.14	CNOT1	CNOT1	0.0287796	0.00225103	8.33331558121378e-33	2.0488462101398e-31	2.97082700470271e-29	Significant
X20111.5	BASP	BASP1	0.141539	0.00964143	2.67534227647525e-41	1.10902269949236e-39	9.53759521563427e-38	Significant
X19555.1	SUMO2	SUMO2	0.0272934	0.00251971	8.0134230093883e-25	1.28317447451192e-23	2.85678530284693e-21	Significant
X11649.3	SMAP1	SMAP1	0.0275686	0.00219689	8.13050693356164e-32	1.87160730911694e-30	2.89852572181472e-28	Significant
X3405.6	UFC1	UFC1	0.0921252	0.00636629	1.99399166600822e-40	7.81142168085823e-39	7.1085802893193e-37	Significant
X4250.23	NSF1C	NSFL1C	0.0862694	0.00534329	4.1782663980749e-48	2.92069013904647e-46	1.4895519709137e-44	Significant
X21955.36	BAT3	BAG6	0.0920439	0.0061247	6.00794452624583e-43	2.88222512452835e-41	2.14183222360664e-39	Significant
X21154.8	CB39L	CAB39L	0.104943	0.0091035	1.23385231194477e-27	2.21039371461463e-26	4.39868349208311e-24	Significant
X19243.2	PFD2	PFDN2	0.0337856	0.0021842	7.72097271155503e-45	4.66529961299893e-43	2.75252677166937e-41	Significant
X17791.25	HPCL1	HPCAL1	0.0407132	0.00316312	3.22154148897031e-33	8.26244273969723e-32	1.14847954081792e-29	Significant
X11490.42	UBL4A	UBL4A	0.0819602	0.00547809	1.10121293202223e-42	5.09847286059643e-41	3.92582410265925e-39	Significant
X11626.7	UB2V1	UBE2V1	0.128249	0.0095587	1.14041632549386e-35	3.35998694246745e-34	4.06558420038561e-32	Significant
X9738.7	FAF2	FAF2	0.0760546	0.00559093	1.85548291246262e-36	5.75199702863412e-35	6.61479658292924e-33	Significant
X24255.38	EPN1	EPN1	0.0455654	0.00359699	1.98076991993495e-32	4.8037039214749e-31	7.0614447645681e-29	Significant
X10085.25	STAR	STAR	0.102379	0.00770958	6.53641302594451e-35	1.82049315917908e-33	2.33023124374922e-31	Significant
X14070.56	ITSN1	ITSN1	0.0374908	0.00288294	8.31718580471658e-34	2.22938100705373e-32	2.96507673938146e-30	Significant
X11683.19	GGA3	GGA3	0.0265503	0.00210402	3.91901240213784e-32	9.19163106159302e-31	1.39712792136214e-28	Significant
X3766.51	STX1a	STX1A	0.0814168	0.00563966	3.1451259284594e-40	1.18024988789029e-38	1.12123739349578e-36	Significant
X22049.24	14-3-3 eta	YWHAH	0.119779	0.00828479	2.39886754994523e-40	9.19565894145672e-39	8.55196281555475e-37	Significant
X3636.37	OLR1	OLR1	0.115649	0.00941797	8.7776154952696e-31	1.90806092930708e-29	3.12921992406361e-27	Significant
X17380.2	UBE2K	UBE2K	0.130691	0.0103245	2.38189528814934e-32	5.6989642296996e-31	8.4914567022524e-29	Significant
X9789.52	Nesprin-2	SYNE2	0.0932337	0.00744721	8.13742308311713e-32	1.87160730911694e-30	2.90099132913126e-28	Significant
X25488.6	PKHO2	PLEKHO2	0.0866039	0.00574109	2.86424755313166e-43	1.39962477273168e-41	1.02110425269144e-39	Significant
X18910.45	LIN7A	LIN7A	0.0496205	0.0035983	2.69313819589003e-37	8.97293240032519e-36	9.60103766834796e-34	Significant
X13475.10	UB2D4	UBE2D4	0.10212	0.00936112	3.35459566204846e-25	5.48584107119393e-24	1.19591335352028e-21	Significant
X3115.64	MK01	MAPK1	0.0305628	0.00256643	4.34957700933544e-29	8.24800108419194e-28	1.55062420382808e-25	Significant
X19239.5	ARF1	ARF1	0.0853576	0.00635413	9.65525965424675e-36	2.86841672228247e-34	3.44210006673897e-32	Significant
X19194.9	Histidyl-tRNA synthetase-related	DTD1	0.113634	0.008221	1.66944188646818e-37	5.72265415890294e-36	5.95156032525906e-34	Significant
X22045.8	SUMO4	SUMO4	0.0222206	0.00182166	2.45177522898239e-30	5.08173179728036e-29	8.74057869132222e-27	Significant
X11633.89	AHSA1	AHSA1	0.0290335	0.00250132	6.38169959279434e-28	1.15486086539654e-26	2.27507590483118e-24	Significant
X10479.18	MMP-10	MMP10	0.0652973	0.00531987	1.12816849988292e-30	2.39400041790632e-29	4.02192070208261e-27	Significant
X20912.10	HDHD1	PUDP	0.0491693	0.0034219	7.01221997363404e-40	2.60401710479222e-38	2.49985642060054e-36	Significant
X3392.68	PKB gamma	AKT3	0.112511	0.00916796	9.70177904266233e-31	2.07106840042462e-29	3.45868422870912e-27	Significant
X12522.6	RD23B	RAD23B	0.106531	0.00856041	1.84490312383163e-31	4.18922269838201e-30	6.57707963645976e-28	Significant
X8963.8	Vti1-rp1	VTI1B	0.0806726	0.00633257	9.76332448654568e-33	2.38398984894078e-31	3.48062517945353e-29	Significant
X13256.21	SHAN1	SHANK1	0.0190289	0.00131278	2.01585075635051e-40	7.81142168085823e-39	7.18650794638957e-37	Significant
X18387.7	suppression of tumorigenicity 13	ST13	0.128884	0.00941993	7.50769502489536e-37	2.41125520394162e-35	2.6764932763752e-33	Significant
X8019.73	STMN3	STMN3	0.0800024	0.00591818	4.2440705525881e-36	1.29317192478432e-34	1.51301115199766e-32	Significant
X15321.8	CPLX2	CPLX2	0.0959843	0.00792589	4.44531205561683e-30	8.95341100467458e-29	1.5847537478274e-26	Significant
X19238.12	GLNA	GLUL	0.123033	0.00934181	1.42780964362675e-34	3.91549336886874e-33	5.09014137952936e-31	Significant
X3397.7	SHP-2	PTPN11	0.155034	0.0133734	5.92868533409666e-28	1.07835526612523e-26	2.11357632160546e-24	Significant
X18284.77	WWC1	WWC1	0.0492548	0.0036968	3.60420895058566e-35	1.01976229435221e-33	1.28490049088379e-31	Significant
X16810.3	RhoGDI	GDI1	0.0631267	0.00755909	5.59821651168812e-16	5.36495749036778e-15	1.99576418641681e-12	Significant
X7997.118	DOC2B	DOC2B	0.102038	0.00662067	8.74211991590898e-45	5.19427625003592e-43	3.11656575002155e-41	Significant
X19392.6	DDAH1	DDAH1	0.111101	0.00750984	6.70862913496546e-42	2.88147745375324e-40	2.39162628661519e-38	Significant
X7893.19	OLR1	OLR1	0.105813	0.00884029	1.69208414152372e-29	3.33275136161992e-28	6.03227996453206e-26	Significant
X13594.158	GGA1	GGA1	0.114656	0.00968008	5.77320569322449e-29	1.08323569980765e-27	2.05814782963453e-25	Significant
X13574.50	RND1	RND1	0.0596877	0.00394388	2.72167631445032e-43	1.3665881776078e-41	9.70277606101539e-40	Significant
X13698.28	K319L	KIAA0319L	0.011588	0.00481996	0.0165471	0.0240483	1	Significant
X17686.27	TBCB	TBCB	0.103726	0.00812014	6.93388006391211e-33	1.72862114880047e-31	2.47192824278467e-29	Significant
X14068.29	TECK	CCL25	0.0749809	0.00501799	1.24672880667918e-42	5.69818999462984e-41	4.44458819581128e-39	Significant
X22981.3	HPCL1	HPCAL1	0.0264573	0.00217154	2.65768203575063e-30	5.47666847251503e-29	9.474636457451e-27	Significant
X12401.3	STALP	STAMBPL1	0.0989768	0.00674024	2.49520042953747e-41	1.04651641544719e-39	8.89538953130108e-38	Significant
X10058.1	RD23A	RAD23A	0.102084	0.00771402	9.06392300902807e-35	2.50487484706861e-33	3.23128855271851e-31	Significant
X18165.181	UB2V2	UBE2V2	0.102042	0.00744605	5.98611281915967e-37	1.9400447454822e-35	2.13404922003042e-33	Significant
X8274.64	Syntaxin-7	STX7	0.0887668	0.00717283	3.51403691482276e-31	7.82971350083946e-30	1.25275416013431e-27	Significant
X5864.10	aldolase A	ALDOA	0.0850663	0.00601465	6.14864859473741e-39	2.2141345697211e-37	2.19199322402389e-35	Significant
X21110.5	UBE2Z	UBE2Z	0.0801661	0.00554543	2.43641148241274e-40	9.24022014340576e-39	8.68580693480142e-37	Significant
X13943.38	DPY30	DPY30	0.0503039	0.00533082	1.17432594613168e-19	1.34613247522812e-18	4.18647199795944e-16	Significant
X13732.79	Cardiotrophin-1	CTF1	0.190907	0.0149803	2.14845429584245e-32	5.1751618680259e-31	7.65923956467833e-29	Significant
X22966.20	GBRAP	GABARAP	0.0598688	0.00500103	1.81833376457769e-29	3.54227315339861e-28	6.48235987071946e-26	Significant
X5467.15	HSP 90b	HSP90AB1	0.104012	0.00753971	2.44916887876517e-37	8.23706325735644e-36	8.73128705279783e-34	Significant
X4976.57	CRK	CRK	0.0746448	0.00547899	1.44514921465203e-36	4.51926048266183e-35	5.15195695023449e-33	Significant
X16803.4	CALB2	CALB2	0.0960812	0.00876119	2.12734863599058e-25	3.52744087781694e-24	7.58399788730642e-22	Significant
X23022.5	RhoGDI	GDI1	0.0484416	0.0061951	2.87683631420086e-14	2.39624333180516e-13	1.02559214601261e-10	Significant
X9719.145	MMP-16	MMP16	0.0651773	0.00503895	1.38165463683427e-33	3.56927447848853e-32	4.92559878031417e-30	Significant
X4696.2	FABP	FABP3	0.0224396	0.00164124	9.94754926039124e-37	3.13831974453936e-35	3.54630131132948e-33	Significant
X19175.18	MARCKSL1	MARCKSL1	0.0744949	0.00728378	1.45869854119681e-22	2.06359535689152e-21	5.20026029936663e-19	Significant
X17325.10	KGUA	GUK1	0.0851433	0.00633879	1.96446371080634e-35	5.60265050321968e-34	7.0033131290246e-32	Significant
X19523.215	PARK7	PARK7	0.0623252	0.00832466	2.82187378994718e-13	2.14498508766774e-12	1.00599800611617e-09	Significant
X8887.21	NUDC:CS	NUDC	0.0478161	0.00368943	1.20377194476368e-33	3.15547572285479e-32	4.29144698308252e-30	Significant
X9826.135	Fragile histidine triad protein	FHIT	0.0652774	0.00518313	4.20578126596875e-32	9.79974523737163e-31	1.49936102131786e-28	Significant
X11608.5	MLP3B	MAP1LC3B	0.0909566	0.00713061	8.16542047014948e-33	2.0215086094502e-31	2.91097239760829e-29	Significant
X10001.7	c-Raf	RAF1	0.0414997	0.00319764	1.07835139313982e-33	2.84764645669886e-32	3.84432271654346e-30	Significant
X21916.82	OTUL	OTULIN	0.0484278	0.00324758	2.79106850322191e-42	1.22841471777606e-40	9.95015921398611e-39	Significant
X19273.3	Glutathione reductase	GSR	0.0935992	0.00695917	8.65801519675829e-36	2.59376673751624e-34	3.08658241764433e-32	Significant
X13621.31	AP2A2	AP2A2	0.106068	0.00873813	3.47767452126995e-30	7.04426685700419e-29	1.23979096683274e-26	Significant
X6378.2	CEI	C5orf38	0.323039	0.0213455	1.65016179478977e-43	8.52583593974714e-42	5.88282679842553e-40	Significant
X13615.60	NCK2	NCK2	0.0302319	0.00311328	1.14516014761906e-20	1.41753330772984e-19	4.08249592626195e-17	Significant
X15526.33	GSHB	GSS	0.0972457	0.00697557	5.23429662740635e-38	1.82943798791212e-36	1.86602674767036e-34	Significant
X19176.27	FA49B	CYRIB	0.0934105	0.00853479	2.62020230408744e-25	4.32454685836654e-24	9.34102121407172e-22	Significant
X19277.4	KAT	TSTD1	0.0281954	0.00319716	1.57381729739093e-17	1.62627787397063e-16	5.61065866519867e-14	Significant
X10082.251	NFL	NEFL	0.0892205	0.0104082	1.06016033063529e-16	1.05571831807676e-15	3.77947157871481e-13	Significant
X11659.31	EPN4	CLINT1	0.0775089	0.00577903	1.34288103622937e-35	3.8921714586648e-34	4.7873708941577e-32	Significant
X4230.1	IF4G2	EIF4G2	0.0620864	0.00450518	3.07468759656262e-37	1.01493160016164e-35	1.09612612817457e-33	Significant
X19293.6	VP26A	VPS26A	0.0814315	0.00761263	2.23054592961077e-24	3.48767378906245e-23	7.9518962390624e-21	Significant
X2864.2	MEK1	MAP2K1	0.047132	0.00432856	4.59835370501033e-25	7.41770631600083e-24	1.63931309583618e-21	Significant
X7761.125	CHKB	CHKB	0.0704376	0.00589276	2.05189598864898e-29	3.9755484780074e-28	7.31500919953361e-26	Significant
X4254.6	NUDC3	NUDCD3	0.0231468	0.0021978	1.04961534606228e-23	1.57221794483699e-22	3.74187870871203e-20	Significant
X4959.2	AGR2	AGR2	0.017042	0.00149657	4.744512578332e-27	8.37336007017504e-26	1.69141873417536e-23	Significant
X17320.19	ADPPT	AASDHPPT	0.0758967	0.00819286	5.16152945070671e-19	5.75026640367794e-18	1.84008524917694e-15	Significant
X20387.277	CHCH7	CHCHD7	0.079833	0.00583882	7.62321145594465e-37	2.42649543218238e-35	2.71767488404427e-33	Significant
X20972.37	CPSF5	NUDT21	0.061658	0.00957796	2.69632990944564e-10	1.46530733645941e-09	9.61241612717371e-07	Significant
X2625.53	HSP 90a	HSP90AA1	0.107782	0.00908096	4.99403732158442e-29	9.41996986849125e-28	1.78037430514485e-25	Significant
X12667.2	GUAD	GDA	0.106911	0.00876623	1.94954756779213e-30	4.06440764864266e-29	6.95013707917894e-27	Significant
X3896.5	Phosphoglycerate mutase 1	PGAM1	0.0967012	0.0092087	1.94887515102036e-23	2.83581220954595e-22	6.94773991338758e-20	Significant
X24669.12	DNJ5B	DNAJC5B	0.0911467	0.00750573	3.44701773679938e-30	7.02206756096559e-29	1.22886182316898e-26	Significant
X19630.2	g-Synuclein	SNCG	0.0780355	0.00813348	2.96341059186981e-20	3.58120635932742e-19	1.05645587600159e-16	Significant
X13113.7	Osteopontin	SPP1	0.0831247	0.00687837	5.52092374121876e-30	1.10573556951938e-28	1.96820931374449e-26	Significant
X11462.8	RBM9	RBFOX2	0.0191377	0.00180885	6.7991880768351e-24	1.03585920914176e-22	2.42391054939171e-20	Significant
X3432.21	EPHA3	EPHA3	0.0389137	0.00315886	6.43982702996461e-31	1.40846523692171e-29	2.29579833618238e-27	Significant
X5980.55	BOLA3	BOLA3	0.0436836	0.00366031	2.68572101428126e-29	5.14763194403908e-28	9.57459541591269e-26	Significant
X20960.47	FUBP1	FUBP1	0.0592221	0.00663905	7.37517552054852e-18	7.82514902701056e-17	2.62925007307555e-14	Significant
X12399.194	CCD50	CCDC50	0.0380476	0.00357685	4.3246877325022e-24	6.67424751790924e-23	1.54175117663703e-20	Significant
X17852.5	PPME1	PPME1	0.0350639	0.00342456	1.57054378064907e-22	2.21303896364187e-21	5.59898857801393e-19	Significant
X14037.18	RANB3	RANBP3	0.0501487	0.00386209	9.75234029885061e-34	2.59455919144794e-32	3.47670931654024e-30	Significant
X12936.38	RLBP1	RLBP1	0.00983281	0.00178695	5.79825931326563e-08	2.1049688851112e-07	0.000206708	Significant
X9514.46	K0494:C-term	EFCAB14	0.102109	0.0182113	3.26143136030116e-08	1.25021535478211e-07	0.00011627	Significant
X8307.47	CK068	C11orf68	0.0793578	0.00791874	8.68114618440329e-22	1.15478679654469e-20	3.09482861473977e-18	Significant
X21736.60	HS2ST	HS2ST1	0.0365041	0.0035921	2.54119441204858e-22	3.51137910036945e-21	9.05935807895319e-19	Significant
X18318.98	SH3G3	SH3GL3	0.0302965	0.00388769	3.46178339534457e-14	2.8634008826922e-13	1.23412578044034e-10	Significant
X3853.56	MDHC	MDH1	0.0962047	0.00627905	2.19056473698477e-44	1.22021301364855e-42	7.8093632873507e-41	Significant
X18319.7	ODPX	PDHX	0.0210355	0.00278534	1.96884500919884e-13	1.5258548821291e-12	7.01893245779386e-10	Significant
X21328.2	SYT1	SYT1	0.109327	0.00883229	3.3734345550265e-31	7.56370703689904e-30	1.20262941886695e-27	Significant
X20139.57	SH3G2	SH3GL2	0.0405352	0.00561409	1.81929961316806e-12	1.25937924678527e-11	6.48580312094413e-09	Significant
X19601.15	ASB9	ASB9	0.166163	0.0135371	8.84247974614959e-31	1.91051153303171e-29	3.15234402950233e-27	Significant
X11161.5	SPG20	SPART	0.0204671	0.00185613	1.19912831383346e-25	2.00699175531281e-24	4.27489243881628e-22	Significant
X12880.1	SV2A	SV2A	0.0236068	0.00289128	2.31686964144151e-15	2.10168963657481e-14	8.25964027173898e-12	Significant
X5496.49	Spondin-1	SPON1	0.0640054	0.00586137	3.09632999076789e-25	5.08682784197582e-24	1.10384164170875e-21	Significant
X11243.90	GPR110	ADGRF1	0.0211459	0.00661009	0.0014664	0.00253896	1	Significant
X3419.49	CAMK2D	CAMK2D	0.0193461	0.00226686	1.42613162717425e-16	1.41226645857672e-15	5.0841592508762e-13	Significant
X9997.12	UBXN4:CD 1	UBXN4	0.0474538	0.00589227	5.32274428143411e-15	4.68532922550928e-14	1.89755833633126e-11	Significant
X11438.6	DNJB2	DNAJB2	0.0355109	0.00300456	9.84440894633027e-29	1.82788114029518e-27	3.50953178936674e-25	Significant
X12881.17	RDH16	RDH16	-0.0470683	0.00471706	1.18706536437725e-21	1.56736593481663e-20	4.2318880240049e-18	Significant
X23396.21	TWF2	TWF2	0.10659	0.00823421	1.2707106340151e-33	3.30663022646995e-32	4.53008341026383e-30	Significant
X17816.58	NCALD	NCALD	0.0216947	0.00221622	6.71958932516743e-21	8.49479998022053e-20	2.39553359442219e-17	Significant
X6285.71	K0152	MLEC	0.0738359	0.00699987	1.12323008572999e-23	1.66846468984476e-22	4.00431525562741e-20	Significant
X23320.11	MB12B	MVB12B	0.0890111	0.00743568	1.75743256921051e-29	3.44244346661289e-28	6.26524710923547e-26	Significant
X13960.15	AGAP3	AGAP3	0.0366877	0.00296851	4.30346544308154e-31	9.5291020525377e-30	1.53418543045857e-27	Significant
X11926.23	P34	AAGAB	0.0412177	0.00326739	3.48661626529403e-32	8.23164701044584e-31	1.24297869857732e-28	Significant
X12993.21	NPL4	NPLOC4	0.0192235	0.00264647	1.33407931792427e-12	9.34379718742637e-12	4.75599276840002e-09	Significant
X7898.29	MDM1	MDM1	0.0348414	0.00353618	3.39848407690664e-21	4.38970859933774e-20	1.21155957341722e-17	Significant
X19233.75	ATOX1	ATOX1	0.0655119	0.00622501	1.06952998846277e-23	1.5953449409497e-22	3.81287440886978e-20	Significant
X11279.42	GABR1	GABBR1	0.0512759	0.0043348	7.30133652546663e-29	1.36278872844443e-27	2.60292647132885e-25	Significant
X11664.32	ARFG2	ARFGAP2	0.0359638	0.00375298	3.38132256544417e-20	4.04510568651291e-19	1.20544149458085e-16	Significant
X22786.57	SPT46	SPATA46	0.0303298	0.00444051	2.25937706980565e-11	1.40570318566442e-10	8.05467925385714e-08	Significant
X20126.19	GFAP	GFAP	0.0597516	0.00673745	1.05254563810088e-17	1.10688058992025e-16	3.75232519982964e-14	Significant
X3825.18	MK08	MAPK8	0.0297746	0.00221841	1.24351932968096e-35	3.63372656583002e-34	4.43314641031262e-32	Significant
X6400.33	P5I13	TP53I13	0.0684425	0.00792809	6.65137751317312e-17	6.69835051820965e-16	2.37121608344622e-13	Significant
X13044.5	TS101	TSG101	0.0769113	0.00795712	1.76147021807749e-20	2.1505620984405e-19	6.27964132744625e-17	Significant
X25413.80	GAGE-2	GAGE2B	0.023722	0.00315522	2.34256893420179e-13	1.79596951622137e-12	8.35125825042938e-10	Significant
X8353.15	SCN2B	SCN2B	0.0908995	0.00844076	1.19020685836927e-24	1.8774723230471e-23	4.24308745008645e-21	Significant
X12800.5	TPPP2	TPPP2	0.04188	0.00946066	1.1545126713115e-05	2.79418715086592e-05	0.0411584	Significant
X3034.1	GFAP	GFAP	0.0525221	0.00963738	7.64230576115983e-08	2.71633300483896e-07	0.000272448	Significant
X20942.4	DNJB8	DNAJB8	0.0928652	0.00817215	5.24262466167249e-27	9.20687532948888e-26	1.86899569188624e-23	Significant
X8975.26	RCD1	CNOT9	0.0488916	0.00463477	9.26303561545524e-24	1.39336379616447e-22	3.30227219690979e-20	Significant
X15627.83	PKB	AKT1	0.0681466	0.00738956	6.54865039372464e-19	7.20553662149023e-18	2.33459386536283e-15	Significant
X12720.71	UBQL4	UBQLN4	0.0856077	0.0071854	3.05532879877319e-29	5.82473110568258e-28	1.08922471676264e-25	Significant
X21935.16	UBE2H	UBE2H	0.0161896	0.00139912	8.41026357496805e-28	1.51427220428086e-26	2.99825896447611e-24	Significant
X21429.50	THOP1	THOP1	-0.0386075	0.017095	0.0243104	0.0343505	1	Significant
X7758.217	RN215:ECD	RNF215	0.015865	0.00157023	5.20156706244133e-22	7.13214868369359e-21	1.85435865776033e-18	Significant
X8409.3	RSPO2	RSPO2	0.060507	0.00725343	6.00056284095633e-16	5.71978784171372e-15	2.13920065280093e-12	Significant
X3481.87	XPNPEP1	XPNPEP1	0.0740587	0.00734902	5.4659974946265e-22	7.46600807216225e-21	1.94862810683435e-18	Significant
X5909.51	Nucleoside diphosphate kinase A	NME1	0.0442416	0.00515504	1.02221370834295e-16	1.02078203648253e-15	3.64419187024262e-13	Significant
X23703.8	PDLI5	PDLIM5	0.105067	0.0116983	4.34492399569519e-18	4.65154776115716e-17	1.54896540446533e-14	Significant
X9883.29	Glyoxalase I	GLO1	0.110717	0.00892869	2.84304685112763e-31	6.41484938244937e-30	1.013546202427e-27	Significant
X23345.2	NECA1	NECAB1	0.0299342	0.00361594	9.71284144826143e-16	9.06447114216021e-15	3.4626279763052e-12	Significant
X9831.12	G3BP2	G3BP2	0.0481676	0.00619601	4.00653338834665e-14	3.28351529412777e-13	1.42832915294558e-10	Significant
X18332.17	CPLX1	CPLX1	0.108853	0.0101242	1.39014398812997e-24	2.18319969941998e-23	4.95586331768334e-21	Significant
X25424.234	SYT12	SYT12	0.0149735	0.00153875	1.03620621441726e-20	1.29163466936977e-19	3.69407515439753e-17	Significant
X3836.51	UFM1	UFM1	0.0230879	0.00259403	8.74442015988851e-18	9.22303487278182e-17	3.11738578700025e-14	Significant
X17814.8	BPNT1	BPNT1	0.0856887	0.00919505	3.1768479447049e-19	3.59538505488031e-18	1.1325462922873e-15	Significant
X18218.48	CB032	CNRIP1	0.141443	0.0104646	4.5803741442892e-36	1.38381642579585e-34	1.6329033824391e-32	Significant
X7745.3	ZCD1	CISD1	0.0719227	0.00724914	1.93674170078135e-21	2.53841329532556e-20	6.90448416328551e-18	Significant
X12432.23	CYBP	CACYBP	0.0694014	0.00581775	2.57924130618559e-29	4.97026770624412e-28	9.19499525655163e-26	Significant
X25060.18	MAOX	ME1	0.105347	0.00833761	2.85742998096208e-32	6.79115858808654e-31	1.01867378821298e-28	Significant
X10903.50	STX8	STX8	0.102144	0.0097385	1.40125703436092e-23	2.05575363271468e-22	4.99548132749668e-20	Significant
X3152.57	TNF sR-II	TNFRSF1B	0.072724	0.00708246	9.65395583961384e-23	1.37665410272893e-21	3.44163525682233e-19	Significant
X19121.3	UBQL2	UBQLN2	0.0931497	0.00809917	1.46046106224525e-27	2.60327184345216e-26	5.20654368690432e-24	Significant
X22989.24	LIN7A	LIN7A	0.0277228	0.00275442	6.90287755646618e-22	9.28632395803846e-21	2.46087584888019e-18	Significant
X21600.10	CNBP1	CTNNBIP1	0.05722	0.0064875	1.52597962000536e-17	1.58142946084858e-16	5.44011734531911e-14	Significant
X22381.1	LACB2	LACTB2	0.061513	0.00602781	1.76080306332408e-22	2.46167173362759e-21	6.27726292075035e-19	Significant
X19768.13	Cystatin B	CSTB	0.0471248	0.00493951	4.68902919133089e-20	5.55361763026399e-19	1.67163890670946e-16	Significant
X25233.2	MPI	MPI	0.0375028	0.00338365	7.3731473821619e-26	1.24574741314726e-24	2.62852704174072e-22	Significant
X12469.19	MARE1	MAPRE1	0.0929115	0.00917619	3.37178814457762e-22	4.64109063143599e-21	1.20204247354192e-18	Significant
X24475.45	SNX12	SNX12	0.111757	0.011997	2.93245921053899e-19	3.32936849858965e-18	1.04542170855715e-15	Significant
X15635.4	SMOC2	SMOC2	0.086592	0.00927449	2.46891601495353e-19	2.81204012565793e-18	8.80168559330933e-16	Significant
X8368.102	TNF sR-II	TNFRSF1B	0.0652024	0.00676262	1.9890520074045e-20	2.41189469605342e-19	7.09097040639704e-17	Significant
X4194.26	AN32B	ANP32B	0.0437859	0.00916443	2.31457260700414e-06	6.27486794218233e-06	0.00825145	Significant
X20923.10	MGDP1	MDP1	0.0900462	0.0101194	8.36710773683756e-18	8.85125788778217e-17	2.98287390818259e-14	Significant
X13963.7	tollip	TOLLIP	0.06261	0.00597009	1.48978484692184e-23	2.17667335216244e-22	5.31108297927636e-20	Significant
X3600.2	Chitotriosidase-1	CHIT1	0.251012	0.0255275	5.05820781817029e-21	6.4401824542061e-20	1.80325108717771e-17	Significant
X19383.131	CINP	CINP	0.0168537	0.00228548	6.40543661608948e-13	4.69863817620555e-12	2.2835381536359e-09	Significant
X20444.12	TPPP3	TPPP3	0.0453548	0.0117932	0.000134233	0.000272053	0.478542	Significant
X25292.4	EST3	CES3	0.0627859	0.00604664	3.66828306942734e-23	5.2731569123018e-22	1.30774291425085e-19	Significant
X20948.16	NUD16	NUDT16	0.0547003	0.0110687	1.02998423556319e-06	2.97169978903453e-06	0.00367189	Significant
X13384.110	FUMH	FH	0.0777192	0.0145707	1.41588833720839e-07	4.81186074561288e-07	0.000504764	Significant
X12460.18	PSA7	PSMA7	0.132566	0.0134745	3.86838772709978e-21	4.96072023277364e-20	1.37908022471107e-17	Significant
X12479.50	KAP1	PRKAR1B	0.0555717	0.005604	2.20919618489e-21	2.88490271030507e-20	7.87578439913285e-18	Significant
X20183.48	MEOX1	MEOX1	0.00605826	0.00159255	0.000159046	0.000318613	0.566998	Significant
X15524.30	PGAM2	PGAM2	0.0886209	0.00862656	1.15233456930084e-22	1.63668236635757e-21	4.10807273955749e-19	Significant
X11636.33	Transgelin-2	TAGLN2	0.0379223	0.00283139	1.55995503261709e-35	4.48487071877413e-34	5.56123969127993e-32	Significant
X16583.8	AP4A	NUDT2	0.048444	0.00572776	2.53224136612809e-16	2.46651378968487e-15	9.02744047024664e-13	Significant
X21157.6	HYKK	HYKK	-0.0329292	0.00305574	1.14785880332827e-24	1.81871850394013e-23	4.09211663386528e-21	Significant
X9171.11	CSRP3	CSRP3	0.0867066	0.00981709	1.41195192032653e-17	1.46752437200119e-16	5.03360859596408e-14	Significant
X8479.4	MMP-10	MMP10	0.0156584	0.00269519	1.07178862414941e-08	4.44810994772136e-08	3.82092644509265e-05	Significant
X22055.31	FOXO1A	FOXO1	-0.0837543	0.0110928	1.81649099134125e-13	1.41392803146977e-12	6.47579038413156e-10	Significant
X25232.4	EHD3	EHD3	0.0912388	0.00779798	2.20471565988831e-28	4.05144913788754e-27	7.85981132750182e-25	Significant
X14326.4	UB2E1	UBE2E1	0.0318809	0.00652203	1.35874962971811e-06	3.85971508362156e-06	0.00484394	Significant
X6991.24	FUT9	FUT9	-0.0103298	0.00389803	0.00828789	0.0126374	1	Significant
X19623.26	40S ribosomal protein SA	RPSA	-0.0526031	0.0141401	0.000220113	0.000429503	0.784702	Significant
X24447.26	F221A	FAM221A	0.0153871	0.0021683	4.12840663826201e-12	2.76649805740678e-11	1.47177696654041e-08	Significant
X20915.68	NECP2	NECAP2	0.0377332	0.00644693	8.36286011990297e-09	3.5199051154019e-08	2.98135963274541e-05	Significant
X22141.59	F261	PFKFB1	-0.00855192	0.00355402	0.0164545	0.0239429	1	Significant
X10870.32	Spastin:MIT	SPAST	0.0484794	0.00559198	5.01955349072281e-17	5.11277376983623e-16	1.78947081944268e-13	Significant
X6502.50	CRIM1:ECD	CRIM1	0.0522206	0.00526986	2.25192250214232e-21	2.929964861364e-20	8.02810372013737e-18	Significant
X15368.3	BMPER	BMPER	0.0659225	0.00678635	1.12736935006243e-20	1.40037342612284e-19	4.01907173297256e-17	Significant
X12462.20	SETMR	SETMAR	-0.0694281	0.0198252	0.000501125	0.000924694	1	Significant
X12812.25	ACYP2	ACYP2	0.0504034	0.00623593	4.0848133273991e-15	3.65888429954216e-14	1.45623595121778e-11	Significant
X20950.159	PRDC1	PRTFDC1	0.024544	0.00263979	3.83840178319699e-19	4.30311394877273e-18	1.36839023570973e-15	Significant
X14042.11	SARP-2	SFRP1	0.0983058	0.00937151	1.38715560226848e-23	2.04347509177154e-22	4.94520972208713e-20	Significant
X15492.1	CRIM1:ECD	CRIM1	0.0182204	0.00209617	4.41264360172922e-17	4.5074711862936e-16	1.57310744401647e-13	Significant
X11656.110	EVL	EVL	0.0242544	0.00286822	2.66147257709312e-16	2.58532690390653e-15	9.48814973733697e-13	Significant
X7223.60	S100A13	S100A13	-0.266641	0.0238127	2.3070784564829e-26	3.97330178616499e-25	8.22473469736154e-23	Significant
X25479.8	LRRF2	LRRFIP2	0.0446967	0.00564217	1.37209771365725e-14	1.17584816086252e-13	4.8915283491881e-11	Significant
X22068.5	2A5D	PPP2R5D	0.0189541	0.00227327	7.05893455197119e-16	6.67509328323005e-15	2.51651016777773e-12	Significant
X8946.38	NR1H4	NR1H4	0.0213814	0.00269404	1.25829279851573e-14	1.08091899438761e-13	4.48581382670858e-11	Significant
X25085.37	ASPC1	ASPSCR1	0.0104772	0.00183545	1.90198007617786e-08	7.59199775854921e-08	6.78055897157407e-05	Significant
X9808.41	TNR6B	TNRC6B	0.0213612	0.00209274	1.94943570197448e-22	2.71474151466368e-21	6.94973827753902e-19	Significant
X3216.2	PIGR	PIGR	0.221308	0.0241599	1.03947712689421e-18	1.13672882128155e-17	3.70573595737786e-15	Significant
X2647.66	Rab GDP dissociation inhibitor beta	GDI2	0.0670034	0.00633748	7.6505024829672e-24	1.15567971829568e-22	2.72740413517781e-20	Significant
X6641.60	PolyUbiquitin K48	UBB	0.0888143	0.00829668	2.78314512004979e-24	4.33271281789411e-23	9.9219123529775e-21	Significant
X15634.139	SLIT1	SLIT1	0.0578553	0.00681694	1.99045214185572e-16	1.94944007849331e-15	7.09596188571564e-13	Significant
X12501.10	TBCA	TBCA	-0.154084	0.0160773	4.2606433230034e-20	5.07999780819636e-19	1.51891934465071e-16	Significant
X22086.2	BRM1L	BRMS1L	0.0951808	0.0325163	0.0035618	0.00577436	1	Significant
X24493.10	MTMR7	MTMR7	-0.0488309	0.00583696	4.95877111370599e-16	4.76496469551532e-15	1.76780190203619e-12	Significant
X21483.155	KAP0	PRKAR1A	0.0633579	0.00555792	3.96708050027495e-27	7.03614029028865e-26	1.41426419834802e-23	Significant
X11493.169	DYL2	DYNLL2	0.0642984	0.00658083	7.01822558763307e-21	8.81892218119305e-20	2.50199742199119e-17	Significant
X4280.47	PSA2	PSMA2	0.0423018	0.00511474	1.07839576798873e-15	1.00116690439579e-14	3.84448091287982e-12	Significant
X17746.77	FIS1	FIS1	0.050644	0.00461266	1.82557746017395e-25	3.04120731099072e-24	6.50818364552013e-22	Significant
X14273.19	PPCE	PREP	0.110882	0.0145317	1.04383607889021e-13	8.26950138054133e-13	3.7212756212436e-10	Significant
X3844.2	Cyclophilin A	PPIA	0.0521022	0.00471869	1.00699479901218e-25	1.69336625399926e-24	3.58993645847842e-22	Significant
X4474.19	Ubiquitin	RPS27A	0.0149544	0.00184149	3.09872917674694e-15	2.79670114306401e-14	1.10469695151028e-11	Significant
X23923.26	PPM1F	PPM1F	0.0762	0.00920844	9.92587151422164e-16	9.23909450344651e-15	3.53857319482001e-12	Significant
X21707.15	C1QL3	C1QL3	0.104691	0.0106186	3.1990280143249e-21	4.14710358947937e-20	1.14045348710683e-17	Significant
X25108.6	ATE1	ATE1	-0.0548271	0.00636023	7.18267858113293e-17	7.21302792725039e-16	2.56062491417389e-13	Significant
X11211.7	TBCE	TBCE	0.0226837	0.00323447	7.16489582414259e-12	4.67817831741178e-11	2.55428536130683e-08	Significant
X23284.5	LMO4	LMO4	-0.0642293	0.00792895	3.54911251702554e-15	3.18704940130883e-14	1.26525861231961e-11	Significant
X17818.22	SUGT1	SUGT1	0.0801493	0.00768156	2.267595864684e-23	3.28617042991807e-22	8.08397925759846e-20	Significant
X16825.20	ATX3	ATXN3	0.0353996	0.00314691	2.11421115793906e-26	3.65881688254988e-25	7.53716277805275e-23	Significant
X7738.299	STX2	STX2	0.0812878	0.00874529	3.53457021009649e-19	3.98757683512468e-18	1.2600742798994e-15	Significant
X16606.85	Aldose reductase	AKR1B1	0.0734978	0.00661067	5.01858860418904e-26	8.5196516066352e-25	1.78912683739339e-22	Significant
X21276.11	CD133	PROM1	-0.0329279	0.00876543	0.000191397	0.000376147	0.682331	Significant
X11320.29	CHFR	CHFR	0.0150505	0.00222204	3.24254505828305e-11	1.96259306159237e-10	1.15596731327791e-07	Significant
X24938.7	AP2B1	AP2B1	0.0619062	0.00651273	6.15125866888726e-20	7.16641737077878e-19	2.19292371545831e-16	Significant
X12494.99	GBRL2	GABARAPL2	0.0614763	0.00602502	1.69209454784039e-22	2.37492797757913e-21	6.03231706305099e-19	Significant
X10530.8	PSB6	PSMB6	0.0105085	0.0015216	1.46613990855953e-11	9.25095358232695e-11	5.22678877401472e-08	Significant
X24426.191	CTNA1	CTNNA1	0.0269924	0.00279076	1.65021553910141e-20	2.02165580649365e-19	5.88301839689653e-17	Significant
X13642.90	CIG49	IFIT3	-0.00870907	0.00265786	0.00111726	0.00197278	1	Significant
X24954.83	AP1B1	AP1B1	0.0199585	0.00248971	6.84300228772522e-15	5.9939319792974e-14	2.43953031557404e-11	Significant
X5885.55	eIF-4H	EIF4H	0.0407035	0.0064245	5.01137808323958e-10	2.59296993711888e-09	1.78655628667491e-06	Significant
X17490.4	SH3BGRL3-like protein	SH3BGRL3	0.01984	0.00209856	9.8184671313466e-20	1.12912372010486e-18	3.50028353232506e-16	Significant
X8053.16	DJB14:CD	DNAJB14	0.0284856	0.00302412	1.34912764617509e-19	1.54155130083788e-18	4.8096400586142e-16	Significant
X13563.259	ACBD7	ACBD7	0.0178362	0.00204237	3.24755931774173e-17	3.33646944315541e-16	1.15775489677493e-13	Significant
X8458.16	a-Synuclein	SNCA	0.0062368	0.00267625	0.0201683	0.0288755	1	Significant
X10557.6	TEX29	TEX29	-0.018844	0.00896622	0.0360487	0.0492956	1	Significant
X13545.97	EIF1A	EIF1AD	0.0133692	0.00160731	7.31667350091768e-16	6.90051350020411e-15	2.60839410307715e-12	Significant
X7144.234	KAZD1	KAZALD1	0.071694	0.00776197	5.91650492114085e-19	6.53013623649137e-18	2.10923400438671e-15	Significant
X20090.63	UB2E3	UBE2E3	0.0147041	0.00357718	4.5960044787896e-05	0.000100954	0.163848	Significant
X16621.77	AIBP	NAXE	0.0584209	0.00616291	7.83793544733777e-20	9.07215580186985e-19	2.79422398697592e-16	Significant
X7952.2	VTI1A	VTI1A	0.0637915	0.00865967	6.6102386511817e-13	4.82899606382434e-12	2.35655007914628e-09	Significant
X5475.10	PKC-B-II	PRKCB	0.0514476	0.00595551	6.57797315484128e-17	6.64319385184396e-16	2.34504742970092e-13	Significant
X18313.4	Asparaginase-like protein 1	ASRGL1	0.0100176	0.0019485	3.8589462927632e-07	1.21278861825438e-06	0.00137571	Significant
X23649.6	KLHL2	KLHL2	0.0529975	0.00590438	4.49391233370669e-18	4.7966459490013e-17	1.60207974696643e-14	Significant
X18236.3	LEGL	LGALSL	0.0226598	0.00231922	7.02545273340484e-21	8.81892218119305e-20	2.50457389945883e-17	Significant
X16317.20	Desmoglein-3	DSG3	0.0269499	0.00404266	6.81271217994988e-11	3.9880655043549e-10	2.42873189215213e-07	Significant
X23371.5	NIF3L	NIF3L1	0.115587	0.0159207	1.32651048363866e-12	9.30907455545635e-12	4.72900987417182e-09	Significant
X2668.70	Calpain I	CAPN1|CAPNS1	0.088132	0.00993127	1.08369011715475e-17	1.1362809610755e-16	3.86335526765668e-14	Significant
X7796.10	CD79A	CD79A	-0.0101414	0.00511338	0.0478707	0.0641817	1	Significant
X13013.41	PRKN2	PRKN	0.00767359	0.00124635	1.45431880033465e-09	6.9406245290402e-09	5.18464652319303e-06	Significant
X18901.26	HS71B	HSPA1B	0.103733	0.0103485	7.98668293155278e-22	1.06638669104815e-20	2.84725246509857e-18	Significant
X22074.35	Ataxin-2-binding protein 1	RBFOX1	0.00538681	0.000928385	1.11417530712892e-08	4.61102662369159e-08	3.9720349699146e-05	Significant
X17355.56	SYT4	SYT4	0.0673244	0.00861244	2.79156554943128e-14	2.33613408068604e-13	9.95193118372251e-11	Significant
X7186.111	STX3	STX3	0.0626261	0.00715404	2.5987705267423e-17	2.67763495024171e-16	9.2646169278363e-14	Significant
X19252.67	PSB2	PSMB2	0.0330816	0.00340541	1.50920430994576e-20	1.8552804706747e-19	5.38031336495663e-17	Significant
X18342.2	SERC	PSAT1	0.0807159	0.00775175	2.86880907676763e-23	4.14060905209579e-22	1.02273043586766e-19	Significant
X21849.2	UBQL3	UBQLN3	0.0686659	0.00614991	3.39007224299992e-26	5.78258734272475e-25	1.20856075462947e-22	Significant
X19219.71	NTF-2	NUTF2	0.0473378	0.00596444	1.19669081946493e-14	1.03048376120591e-13	4.26620277139248e-11	Significant
X18280.29	DTD2	DTD2	0.0437706	0.0047519	7.03524796161377e-19	7.71712584097018e-18	2.50806589831531e-15	Significant
X7167.102	VAPA	VAPA	0.0694139	0.00723806	3.0874805181093e-20	3.71853650238502e-19	1.10068680470597e-16	Significant
X5494.52	RUXF	SNRPF	-0.0461828	0.00655166	5.44359799191489e-12	3.61385974696026e-11	1.94064268411766e-08	Significant
X23315.30	FAM9B	FAM9B	0.00837008	0.00290371	0.00409945	0.00656833	1	Significant
X20975.2	RCAN2	RCAN2	0.0306621	0.00371156	1.10372984248015e-15	1.02202516582902e-14	3.93479688844173e-12	Significant
X6603.18	KALM	ANOS1	0.00250299	0.00103334	0.0157504	0.0229747	1	Significant
X10447.18	PABP3	PABPC3	0.00551815	0.00181503	0.00247913	0.00415715	1	Significant
X24319.19	ISPD	CRPPA	0.0104922	0.00134754	3.59021524469387e-14	2.96275864521612e-13	1.27991173473336e-10	Significant
X10339.48	NSE	ENO2	0.10622	0.00829823	5.16963440036909e-33	1.29786948150111e-31	1.84297466373158e-29	Significant
X22009.1	PPM1B	PPM1B	0.0728871	0.00652593	3.12148263820488e-26	5.35004115634635e-25	1.11280856052004e-22	Significant
X11365.17	TEN4	TENM4	0.0217073	0.00296803	9.63567761579744e-13	6.85652508988381e-12	3.43511907003179e-09	Significant
X21002.1	NUDC2	NUDCD2	0.0317055	0.00402129	2.09780219509958e-14	1.76800586891962e-13	7.47866482553e-11	Significant
X2652.15	suPAR	PLAUR	0.0716276	0.00842213	1.77347018911597e-16	1.74652520005482e-15	6.32242122419843e-13	Significant
X12564.9	NIP7	NIP7	-0.0104676	0.00159454	1.25683846141567e-10	7.11210970626486e-10	4.48062911494686e-07	Significant
X20434.23	PC4L1	PCP4L1	0.0324879	0.00394408	1.37233775139751e-15	1.26418193378091e-14	4.89238408373212e-12	Significant
X18339.207	PSB3	PSMB3	0.0245149	0.00245535	1.25258474384929e-21	1.64777291949178e-20	4.46546461182272e-18	Significant
X7625.27	14-3-3 protein theta	YWHAQ	0.0751168	0.00809655	3.9654126043694e-19	4.43156612369182e-18	1.41366959345769e-15	Significant
X3350.53	CAMK2A	CAMK2A	0.00714653	0.00120618	5.56913482636277e-09	2.40362780338781e-08	1.98539656559833e-05	Significant
X23187.9	VCIP1	VCPIP1	0.00702929	0.00150525	3.81146151252806e-06	9.88927241059864e-06	0.0135879	Significant
X22088.3	BTG1	BTG1	0.0826699	0.00671294	6.14485316252845e-31	1.35224700767987e-29	2.19064015244139e-27	Significant
X11494.4	ELL2	ELL2	-0.00782663	0.00298754	0.00904759	0.0137312	1	Significant
X9870.17	SYWC	WARS1	0.0719666	0.010724	4.8870074993496e-11	2.91828839785282e-10	1.74221817351813e-07	Significant
X19553.14	STX1a	STX1A	0.112327	0.0110522	2.39413998337252e-22	3.32105410144865e-21	8.53510904072303e-19	Significant
X11130.158	CACB4	CACNB4	0.0165337	0.00224889	7.35084072971304e-13	5.31556738365659e-12	2.6205747201427e-09	Significant
X18235.16	PGP	PGP	0.0540662	0.00421227	4.0885888342014e-33	1.04112994242343e-31	1.4575819193928e-29	Significant
X9834.62	ADH1B	ADH1B	0.0166894	0.00180513	5.41520007442086e-19	6.01407734121818e-18	1.93051882653104e-15	Significant
X17799.9	6PGL	PGLS	0.0746951	0.00822558	1.99034037981723e-18	2.156706217036e-17	7.09556345404842e-15	Significant
X4306.4	Transketolase	TKT	0.0374494	0.00356587	1.24454198966241e-23	1.8409926112641e-22	4.43679219314649e-20	Significant
X15604.18	JNK2	MAPK9	0.0168333	0.00258176	1.6352668893615e-10	9.15184687688186e-10	5.82972646057375e-07	Significant
X21341.19	CHM4A	CHMP4A	0.0430295	0.0120996	0.000410023	0.000766107	1	Significant
X3336.50	TFPI	TFPI	0.0361686	0.0106811	0.000759434	0.00137152	1	Significant
X9266.1	sTREM-1	TREM1	0.0437948	0.00527174	8.10379107515731e-16	7.62269529892765e-15	2.88900151829358e-12	Significant
X11546.7	CYGB	CYGB	0.0135657	0.00156462	5.13423522899638e-17	5.21468620836812e-16	1.83035485913721e-13	Significant
X18397.5	AK1C4	AKR1C4	-0.0153282	0.00370302	4.06482251916409e-05	8.98951134045905e-05	0.144911	Significant
X12646.2	RPE	RPE	0.0215947	0.00341932	5.72021110392416e-10	2.92576077266709e-09	2.03925525854896e-06	Significant
X15316.262	TXN4B	TXNL4B	0.0233301	0.00282354	1.11877229836591e-15	1.03327027038199e-14	3.98842324367447e-12	Significant
X11160.56	RN122	RNF122	0.0477135	0.00437609	3.56455127490729e-25	5.8025686278742e-24	1.27076252950445e-21	Significant
X12677.164	FLII	FLII	0.0209301	0.00208549	7.45266710927002e-22	9.98825497915324e-21	2.65687582445476e-18	Significant
X10948.14	PLD3	PLD3	0.0953584	0.0118044	4.30357690544905e-15	3.82599792217603e-14	1.53422516679259e-11	Significant
X9388.18	MCEE	MCEE	0.0204746	0.00329366	1.02119331837649e-09	4.98706052056464e-09	3.64055418001219e-06	Significant
X11241.8	ARLY	ASL	0.0305375	0.0137834	0.0271363	0.0379972	1	Significant
X12476.50	TIGAR	TIGAR	0.0086841	0.00157896	5.85493406699201e-08	2.12338148004339e-07	0.000208728	Significant
X6404.20	C1QRF	C1QL1	0.0542144	0.00813267	6.43355335182232e-11	3.77230554263924e-10	2.29356176992466e-07	Significant
X3170.6	AMPM2	METAP2	0.0909183	0.0117992	6.40929908432652e-14	5.16949122977919e-13	2.2849151235624e-10	Significant
X24237.115	CACB3	CACNB3	0.0252934	0.00389125	1.8389971956123e-10	1.02437890661841e-09	6.55602500235785e-07	Significant
X25463.3	KAP3	PRKAR2B	0.061061	0.00630162	1.34706582447266e-20	1.6616919253443e-19	4.80228966424503e-17	Significant
X25064.34	INP4A	INPP4A	0.012884	0.00233667	5.42773952968931e-08	1.99072957030272e-07	0.000193499	Significant
X18392.19	MAT2B	MAT2B	0.0376903	0.0055175	2.32409464619509e-11	1.44319295605576e-10	8.2853974136855e-08	Significant
X21536.65	CPLX3	CPLX3	0.0313035	0.00459978	2.6902189155519e-11	1.6507109180624e-10	9.59063043394252e-08	Significant
X18233.10	GOT2	GOT2	0.0929236	0.00876247	4.93902025301147e-24	7.58948586292495e-23	1.76076072019859e-20	Significant
X5717.2	CILP	CILP	0.0106381	0.0043862	0.0156335	0.0228135	1	Significant
X14099.20	PSA4	PSMA4	0.0111556	0.00147936	2.06235464374938e-13	1.59485776680402e-12	7.35229430496654e-10	Significant
X9757.29	ENAH	ENAH	0.0229199	0.00274794	6.39115126668985e-16	6.07585447086648e-15	2.27844542657493e-12	Significant
X21752.10	MIRO1	RHOT1	0.00902644	0.00183722	1.19034752860323e-06	3.40576961434231e-06	0.00424359	Significant
X2877.3	UBC9	UBE2I	0.0451153	0.00598881	2.19617402120845e-13	1.69100656276633e-12	7.82936038560812e-10	Significant
X5596.75	CD5:ECD	CD5	0.0747506	0.0102022	8.51857890762716e-13	6.08591859833483e-12	3.03687338056908e-09	Significant
X13491.40	PDE6D	PDE6D	0.0170458	0.00186422	1.2042677269627e-18	1.31290961670398e-17	4.29321444662203e-15	Significant
X24435.1	Dynamin	DNM1	0.087918	0.00926892	7.34713913484258e-20	8.53177557515107e-19	2.61925510157138e-16	Significant
X9872.23	CTNA2	CTNNA2	0.0137178	0.00165232	8.19501874247291e-16	7.68822153076735e-15	2.92152418169159e-12	Significant
X7089.42	SYT11	SYT11	0.0154473	0.00252568	1.82888102437187e-09	8.57889585774436e-09	6.51996085188572e-06	Significant
X9754.33	Quinone reductase 2	NQO2	0.039659	0.00682312	1.05164528089051e-08	4.37469711362272e-08	3.74911542637467e-05	Significant
X21537.33	SCLY	SCLY	0.0316844	0.00516056	1.62798279291582e-09	7.69729264820278e-09	5.8037586567449e-06	Significant
X8006.12	DJB12	DNAJB12	0.0393395	0.00859093	5.78215394641961e-06	1.45677588826756e-05	0.0206134	Significant
X3642.4	SLAF5	CD84	0.0420144	0.00519997	4.28408074706418e-15	3.81818696582095e-14	1.52727478632838e-11	Significant
X17678.28	VSIG4	VSIG4	0.0673725	0.00917569	7.7125042389714e-13	5.55456113372385e-12	2.7495077611933e-09	Significant
X3855.56	Peroxiredoxin-1	PRDX1	0.0796038	0.00883298	3.71798470619162e-18	4.0044155521369e-17	1.32546154775731e-14	Significant
X21180.16	PLCX3	PLCXD3	0.078523	0.0125371	7.62548696601648e-10	3.81274348300824e-09	2.71848610338488e-06	Significant
X21475.137	TXNL1	TXNL1	0.0855689	0.00850963	6.35568773716494e-22	8.58258590264887e-21	2.2658026782993e-18	Significant
X21499.17	COQ7	COQ7	-0.0115643	0.00156953	6.42538243888685e-13	4.70359104612559e-12	2.29064883946316e-09	Significant
X25297.11	SPD2B	SH3PXD2B	0.0235387	0.00382589	1.49203359006948e-09	7.11109592058515e-09	5.3190997485977e-06	Significant
X21326.28	TBCC	TBCC	0.0236843	0.00491723	1.897647563318e-06	5.23615600869092e-06	0.00676511	Significant
X4212.5	EP15R	EPS15L1	0.00828795	0.00125279	8.78840347837214e-11	5.08614584422024e-10	3.13306584003967e-07	Significant
X18310.26	SELW	SELENOW	0.0725368	0.00741748	6.44551155348729e-21	8.17731270042071e-20	2.29782486881822e-17	Significant
X19438.68	SYF2	SYF2	0.0366741	0.00485963	1.89103914779894e-13	1.46874827056715e-12	6.74155456190322e-10	Significant
X24902.84	GEPH	GPHN	0.109066	0.0100856	8.02658927955561e-25	1.28317447451192e-23	2.86147907816158e-21	Significant
X22579.93	NRX1B	NRXN1	0.0999558	0.0121727	1.56556196175835e-15	1.43476308320527e-14	5.58122839366852e-12	Significant
X13939.14	UGPA1	UGP2	0.0500376	0.00462652	1.06596812547908e-24	1.69650730684505e-23	3.80017636733292e-21	Significant
X7999.23	CD39	ENTPD1	0.0663698	0.00918297	1.66002964033607e-12	1.1536073426507e-11	5.91800566779809e-09	Significant
X23929.159	PRRT2	PRRT2	0.0940339	0.00933723	5.53540486677265e-22	7.50331496199411e-21	1.97337183500445e-18	Significant
X3441.64	GSK-3 alpha	GSK3A	0.00650865	0.00220309	0.00327307	0.00533052	1	Significant
X13676.46	Inhibin bB chain	INHBB	0.0592642	0.010641	4.06564436718609e-08	1.53701189491181e-07	0.00014494	Significant
X23409.83	SYAP1	SYAP1	0.0179127	0.00195969	1.2529549842608e-18	1.361824548442e-17	4.46678451888975e-15	Significant
X11258.41	MAdCAM-1	MADCAM1	0.023658	0.00275559	9.57386940962684e-17	9.58731585542688e-16	3.41308444453197e-13	Significant
X20457.13	COA4	COA4	0.0269193	0.0033782	9.95836420694781e-15	8.61688553343906e-14	3.55015683977689e-11	Significant
X17827.53	DLRB2	DYNLRB2	0.015273	0.00209573	1.16502109821649e-12	8.20810319197982e-12	4.15330021514179e-09	Significant
X20107.11	MYL4	MYL4	0.0224414	0.00530444	2.72918028504626e-05	6.20110115754615e-05	0.0972953	Significant
X13434.172	PARVA	PARVA	0.0757959	0.00922316	1.49661761123692e-15	1.37511386187104e-14	5.33544178405962e-12	Significant
X23365.7	FNDC8	FNDC8	-0.00976197	0.00189783	3.75123597504507e-07	1.18449387955836e-06	0.00133732	Significant
X20929.4	CTDSL	CTDSPL	-0.0108796	0.00243886	9.91950074812359e-06	2.42711188517918e-05	0.035363	Significant
X18340.2	Proteasome beta chain	PSMB4	0.0992951	0.0142533	9.35423748279111e-12	6.00862281552258e-11	3.33478566261503e-08	Significant
X17205.21	RAB5A	RAB5A	-0.00959147	0.00267096	0.000360266	0.000679549	1	Significant
X21857.26	RACK1	RACK1	-0.0239194	0.0112915	0.0346052	0.0475772	1	Significant
X13124.20	ISLR2	ISLR2	0.100898	0.0128082	1.80373059287463e-14	1.52738706973826e-13	6.43029956359806e-11	Significant
X9942.2	NXT1	NXT1	0.0138968	0.00226724	1.70748497929514e-09	8.05183062326346e-09	6.08718395118717e-06	Significant
X8268.98	HS3SA	HS3ST3A1	0.00941982	0.00196426	2.10941822770077e-06	5.77135531984132e-06	0.00752008	Significant
X3897.61	PLPP	PDXP	0.0652526	0.00508945	4.78544100166928e-33	1.20993596957099e-31	1.7060097170951e-29	Significant
X18373.13	Radixin	RDX	0.0580934	0.00688081	2.7935843230678e-16	2.69895070778773e-15	9.95912811173671e-13	Significant
X21539.139	SYT6	SYT6	0.0571616	0.00837202	2.36595142566725e-11	1.46180534358817e-10	8.43461683250375e-08	Significant
X12497.29	SDOS	NUDT16L1	0.0404935	0.00505152	6.89997555853752e-15	6.02902276132016e-14	2.45984128661863e-11	Significant
X12988.49	EWS	EWSR1	0.0231228	0.0036283	4.04534013851383e-10	2.11151355692559e-09	1.44216375938018e-06	Significant
X21814.13	MMAD	MMADHC	-0.0110661	0.00241359	5.6515979834783e-06	1.42690841438386e-05	0.0201479	Significant
X8528.74	ISLR2	ISLR2	0.10528	0.0133591	1.7639350202789e-14	1.49724484459388e-13	6.28842834729428e-11	Significant
X5464.52	GRB2 adapter protein	GRB2	0.0602133	0.0081152	4.50736109635209e-13	3.3616615708149e-12	1.60687423084952e-09	Significant
X11401.181	RN146	RNF146	0.00895707	0.00116467	7.07411404595269e-14	5.68000373284264e-13	2.52192165738213e-10	Significant
X17836.17	S100A16	S100A16	0.0431254	0.00533618	4.58052731680207e-15	4.06208454835805e-14	1.63295798843994e-11	Significant
X22527.4	PDLI3	PDLIM3	0.0268331	0.00943233	0.00461382	0.00732989	1	Significant
X8221.19	MIF	MIF	0.156743	0.0235067	6.31407101948057e-11	3.72060548503277e-10	2.25096631844482e-07	Significant
X16315.105	VEGF sR1	FLT1	0.0266313	0.00396771	4.93024885119396e-11	2.93918681513486e-10	1.75763371545065e-07	Significant
X5682.13	VASN	VASN	0.0353392	0.00484707	1.08515355789057e-12	7.66053947302947e-12	3.86857243387988e-09	Significant
X5020.50	phosphoglycerate kinase 1	PGK1	0.0293134	0.00327706	5.81860591409301e-18	6.19203883096764e-17	2.07433300837416e-14	Significant
X21876.266	PICK1	PICK1	-0.0128176	0.00323174	8.27882480276342e-05	0.000172597	0.29514	Significant
X14271.23	RAB6B	RAB6B	0.0451712	0.00641388	5.7172217328334e-12	3.78845640846674e-11	2.03818954775511e-08	Significant
X23285.51	KCTD2	KCTD2	-0.0415869	0.00806113	3.48078807902825e-07	1.10695892076144e-06	0.0012409	Significant
X7139.14	SLIK4	SLITRK4	0.0904779	0.0106068	1.42121880094004e-16	1.41132173408113e-15	5.06664502535124e-13	Significant
X19287.59	DENR	DENR	0.0051053	0.00254284	0.0451758	0.0607513	1	Significant
X13097.11	Apoptosis regulator Bcl-W	BCL2L2	0.0142398	0.00157115	2.26635124151928e-18	2.44834611394431e-17	8.07954217601623e-15	Significant
X10089.7	ASML	ASMTL	0.00470355	0.00172003	0.00644836	0.0100167	1	Significant
X8231.122	VEGF sR1	FLT1	0.0494699	0.00703654	6.21082369200315e-12	4.09016707689053e-11	2.21415864619912e-08	Significant
X13959.7	LAP	LAP3	0.0375583	0.0134152	0.00529719	0.00834489	1	Significant
X21104.37	UBL5	UBL5	0.015082	0.00492609	0.00231351	0.00389224	1	Significant
X10737.96	Serpin B1	SERPINB1	0.0483902	0.00639459	1.62548463536621e-13	1.27359400551221e-12	5.79485272508054e-10	Significant
X12954.71	PPARa	PPARA	-0.00634889	0.0022748	0.00544494	0.0085512	1	Significant
X9761.89	LDHA	LDHA	0.157423	0.020609	1.0035674440693e-13	7.98597754041753e-13	3.57771793810705e-10	Significant
X2942.50	Cytochrome c	CYCS	0.0483701	0.00603013	6.53481118211363e-15	5.7380792769052e-14	2.32966018642351e-11	Significant
X13022.20	P5I11	TP53I11	-0.092842	0.0212016	1.4271628805107e-05	3.39641900468668e-05	0.0508784	Significant
X25499.37	DDHD2	DDHD2	0.0336963	0.00482264	8.44035793810392e-12	5.44120724219538e-11	3.00898760493405e-08	Significant
X5019.16	PGP9.5	UCHL1	0.128097	0.00986153	7.60009603989515e-34	2.0526016956232e-32	2.70943423822262e-30	Significant
X23903.3	GOT2	GOT2	0.0922551	0.0086579	3.22250114717298e-24	4.99487677811812e-23	1.14882165896717e-20	Significant
X21249.115	DFFA	DFFA	0.0132821	0.0018868	5.81937837725999e-12	3.84899516046973e-11	2.07460839149319e-08	Significant
X11391.69	MVK	MVK	-0.0143064	0.00202785	5.33786806533482e-12	3.55027978599228e-11	1.90294996529186e-08	Significant
X12016.60	CBL	CBL	0.053479	0.0085124	6.89137200298889e-10	3.47492803262453e-09	2.45677411906554e-06	Significant
X10613.33	CASC4	GOLM2	0.0584798	0.00751778	3.7070903832499e-14	3.04510995766956e-13	1.32157772162859e-10	Significant
X2654.19	TNF sR-I	TNFRSF1A	0.0447012	0.00676825	9.44584226852991e-11	5.4313593044047e-10	3.36744276873091e-07	Significant
X12655.30	SNAB	NAPB	0.0143559	0.00164687	3.47443899406019e-17	3.55930316489212e-16	1.23863750138246e-13	Significant
X21133.33	CMC4	CMC4	0.0407293	0.00517148	1.86077228454917e-14	1.57195573327436e-13	6.63365319441779e-11	Significant
X12356.65	Sorcin	SRI	0.0404369	0.00646421	8.60489009581807e-10	4.27844256507551e-09	3.06764331915914e-06	Significant
X2822.56	CD97	ADGRE5	0.0168468	0.00217953	5.30323357653119e-14	4.30661223242225e-13	1.89060277003337e-10	Significant
X24463.1	NDRG2	NDRG2	0.0370181	0.00565748	1.39204070559273e-10	7.85225492949064e-10	4.96262511543808e-07	Significant
X12731.12	PKHA7	PLEKHA7	0.0118707	0.00205239	1.23029043070539e-08	5.06464825111399e-08	4.38598538546472e-05	Significant
X6284.7	F150B	ALKAL2	0.0155752	0.00554798	0.00518351	0.00817303	1	Significant
X23593.14	M21D2	MB21D2	-0.0121222	0.00172964	7.14593281002927e-12	4.67435788399162e-11	2.54752504677543e-08	Significant
X11454.87	EIF3G	EIF3G	0.0349254	0.00624646	3.57806788235562e-08	1.36425796797837e-07	0.000127558	Significant
X17728.61	CHM2A	CHMP2A	0.0492493	0.00882126	3.76002530101831e-08	1.43057526127324e-07	0.000134045	Significant
X20370.6	ACYP1	ACYP1	0.0408769	0.00661454	1.2695102500543e-09	6.12422739031607e-09	4.52580404144358e-06	Significant
X4192.10	AK1A1	AKR1A1	0.0513054	0.00917754	3.59014506855241e-08	1.36740033860997e-07	0.000127989	Significant
X19802.22	RCAS1	EBAG9	0.0172613	0.00456212	0.000171687	0.000341364	0.612066	Significant
X15465.79	CNPY4	CNPY4	0.0456082	0.00715002	3.82504016629658e-10	2.00828692089062e-09	1.36362681928473e-06	Significant
X24685.12	SNX11	SNX11	0.0241626	0.00450682	1.22021793246609e-07	4.18679203969356e-07	0.000435008	Significant
X2826.53	EDA	EDA	0.0320428	0.00580907	5.37346093543057e-08	1.97392393680367e-07	0.000191564	Significant
X7965.25	HBAT	HBQ1	-0.0534946	0.0148416	0.000341282	0.000645448	1	Significant
X20988.63	RP9	RP9	0.0626774	0.0105159	4.5784911048239e-09	2.02259241495628e-08	1.63223207886972e-05	Significant
X16780.6	HSP 70	HSPA1A	0.0646078	0.0073086	1.32875851240537e-17	1.38509476512431e-16	4.73702409672514e-14	Significant
X19139.3	HSF2B	HSF2BP	0.0101186	0.00465668	0.0302156	0.0420119	1	Significant
X9853.3	IFIT2	IFIT2	-0.0120466	0.00257717	3.74484060348369e-06	9.73767815566693e-06	0.0133504	Significant
X7927.16	SIA7E	ST6GALNAC5	0.0488515	0.00633449	5.97137996307117e-14	4.82720398375254e-13	2.12879695683487e-10	Significant
X8024.64	TPST2	TPST2	0.0680865	0.0113625	3.76913850084172e-09	1.67752543764054e-08	1.34369787555007e-05	Significant
X21172.11	MESD1	TLNRD1	0.0211741	0.00823653	0.0104122	0.0156556	1	Significant
X10418.36	STX12	STX12	0.0805996	0.00993866	3.34078499595353e-15	3.00755012893291e-14	1.19098985105743e-11	Significant
X7748.11	NDUV2	NDUFV2	0.0382415	0.00544123	6.28268399606526e-12	4.12481923498576e-11	2.23977684459727e-08	Significant
X8249.124	ALK	ALK	0.0148378	0.00177631	5.91354135441697e-16	5.65195038297493e-15	2.10817749284965e-12	Significant
X8102.239	CA186	RHEX	0.0208595	0.00329676	5.22361524712333e-10	2.69106768150212e-09	1.86221883559947e-06	Significant
X21111.49	HPBP1	HSPBP1	0.0254192	0.00300509	2.75204018982268e-16	2.66603893389072e-15	9.81102327671785e-13	Significant
X5939.42	TWEAK	TNFSF12	0.0675546	0.00811351	6.65412332038969e-16	6.30902915882693e-15	2.37219496371892e-12	Significant
X5934.1	Ferritin	FTH1|FTL	0.062894	0.00872357	1.86720410674076e-12	1.29003539545171e-11	6.65658264053081e-09	Significant
X7084.1	DRAXI	DRAXIN	0.00815975	0.00208356	0.000101684	0.000209539	0.362502	Significant
X8095.213	Cyclophilin F	PPIF	0.00658903	0.0024527	0.00744046	0.0114333	1	Significant
X15303.63	S100A5	S100A5	0.0153293	0.00354632	1.83403194933127e-05	4.26505146729679e-05	0.0653832	Significant
X9053.16	CRIP2	CRIP2	0.0308356	0.00565706	7.64204759464349e-08	2.71633300483896e-07	0.000272439	Significant
X17404.5	ARL5B	ARL5B	-0.0328551	0.00590484	4.19482219253209e-08	1.57748324012415e-07	0.000149545	Significant
X21323.2	RWDD1	RWDD1	0.0725395	0.00766544	9.11218536062873e-20	1.05129258286865e-18	3.24849408106414e-16	Significant
X9265.10	GLIP1	GLIPR1	0.0126443	0.00172021	7.2429989345868e-13	5.24822991906544e-12	2.58212912018019e-09	Significant
X25482.5	NFIA	NFIA	0.0327248	0.00615459	1.54567079039162e-07	5.22304868980675e-07	0.000551032	Significant
X9173.21	PGM1	PGM1	0.00725031	0.00302067	0.0167278	0.0242911	1	Significant
X19602.36	jun-D	JUND	0.0118206	0.00305816	0.000124527	0.000253553	0.443939	Significant
X9207.60	QORL1	CRYZL1	-0.0113689	0.00543082	0.0367846	0.0502634	1	Significant
X15324.58	Ferritin light chain	FTL	0.0663826	0.00909406	1.02086917552206e-12	7.23538491200029e-12	3.63939861073614e-09	Significant
X9995.6	DUT	DUT	0.0265845	0.00359179	5.28227102661707e-13	3.8988190910745e-12	1.88312962098899e-09	Significant
X25299.11	NCOA7	NCOA7	0.0130545	0.00200784	1.80415475083365e-10	1.00812095403166e-09	6.43181168672196e-07	Significant
X12572.236	EFS	EFS	-0.0149765	0.00155127	1.9117096095392e-20	2.32602210170896e-19	6.81524475800725e-17	Significant
X13743.56	CUL4B	CUL4B	0.00881838	0.00118944	4.89909301848615e-13	3.63859721060482e-12	1.74652666109031e-09	Significant
X20430.8	Natriuretic Peptide C-Type	NPPC	0.00822533	0.0020848	9.01719849931014e-05	0.000187115	0.321463	Significant
X21717.44	UB2Q2	UBE2Q2	0.0101105	0.00284815	0.000418793	0.000781675	1	Significant
X18840.205	SH21B	SH2D1B	-0.0121574	0.00239853	5.49273960434047e-07	1.66794009280015e-06	0.00195816	Significant
X5229.90	IMDH1	IMPDH1	-0.0103529	0.0024587	2.98239281292562e-05	6.74633907238568e-05	0.106322	Significant
X8606.39	GPNMB:CD	GPNMB	0.00414961	0.00185759	0.0259019	0.0363974	1	Significant
X6248.68	Fas, soluble	FAS	0.00457658	0.00168037	0.00666816	0.0103328	1	Significant
X21118.48	GFRP	GCHFR	0.0575428	0.00788785	1.05197526201949e-12	7.44105517678469e-12	3.75029180909948e-09	Significant
X12945.33	RAB18	RAB18	0.0467553	0.0104754	9.82425419691236e-06	2.40545784423026e-05	0.0350235	Significant
X4309.59	Triosephosphate isomerase	TPI1	0.0501512	0.00610921	1.59859141119757e-15	1.46127650792804e-14	5.69897838091934e-12	Significant
X19331.18	BAIP2	BAIAP2	-0.010459	0.00244988	2.32189369186723e-05	5.33003928622452e-05	0.0827755	Significant
X7752.31	CLC4D	CLEC4D	0.0089502	0.00120293	4.00907163868695e-13	3.00891376671978e-12	1.4292340391919e-09	Significant
X13954.9	GNA1	GNPNAT1	0.0201643	0.00454721	1.12292970457032e-05	2.72329550802258e-05	0.0400324	Significant
X12381.26	CBR1	CBR1	0.072598	0.0112016	2.04691632177394e-10	1.12960629831642e-09	7.2972566871241e-07	Significant
X22059.56	PALMD	PALMD	0.0759576	0.0105643	2.15213662603421e-12	1.47545520611768e-11	7.67236707181196e-09	Significant
X8305.18	SULF2	SULF2	0.0165452	0.00342653	1.78994449296826e-06	4.98138338597334e-06	0.00638115	Significant
X6518.85	ghrelin	GHRL	0.0178437	0.00277213	2.73447829379863e-10	1.47927391766193e-09	9.74841511739211e-07	Significant
X21958.4	ABR	ABR	0.065147	0.00860769	1.65448972891714e-13	1.29347716745386e-12	5.8982558835896e-10	Significant
X2670.67	CK-MM	CKM	-0.0113935	0.00510167	0.0259374	0.036433	1	Significant
X6938.21	PCDGC	PCDHGA12	0.058728	0.00796188	6.07790250732488e-13	4.47550617578337e-12	2.16677224386132e-09	Significant
X11681.8	NUPL	AGFG1	0.0387899	0.00316179	1.28478206891158e-30	2.71020596193478e-29	4.58024807566978e-27	Significant
X17335.18	VAMP2	VAMP2	0.0145507	0.00217085	5.34462829672533e-11	3.17559997963763e-10	1.90535998778258e-07	Significant
X8033.1	DJC18	DNAJC18	0.0142095	0.00276107	3.71932082456674e-07	1.17651985266907e-06	0.00132594	Significant
X8458.111	a-Synuclein	SNCA	0.00557636	0.0022988	0.0156156	0.0227967	1	Significant
X5437.63	FABP	FABP3	0.0723843	0.0107153	3.69363006069155e-11	2.22805265082324e-10	1.31677911663654e-07	Significant
X18308.30	STXB6	STXBP6	0.0158697	0.003575	1.09822276360454e-05	2.66882355299944e-05	0.0391516	Significant
X9361.7	PCDC2	PCDHAC2	0.0482128	0.00667829	1.76830148758437e-12	1.22645813292574e-11	6.30399480323828e-09	Significant
X15418.25	MK10	MAPK10	0.0565592	0.00702221	5.17428715425972e-15	4.56592418439007e-14	1.84463337049359e-11	Significant
X5465.32	H6ST1	HS6ST1	0.0716717	0.010625	3.96014191383062e-11	2.38075985207524e-10	1.41179059228062e-07	Significant
X12463.7	KLH13	KLHL13	-0.00581248	0.00138115	3.01131500457643e-05	6.79882076714058e-05	0.107353	Significant
X21238.40	CK5P3	CDK5RAP3	-0.0202148	0.00464918	1.63759584342095e-05	3.84586902621587e-05	0.0583803	Significant
X6321.65	PCDGA	PCDHGA10	0.0584919	0.00789628	4.9149433416728e-13	3.64278025219616e-12	1.75217730130635e-09	Significant
X21281.13	CK2N2	CAMK2N2	0.0311885	0.00740724	2.98954776461978e-05	6.75823575197813e-05	0.106577	Significant
X21152.25	EYA2	EYA2	0.0572196	0.00600294	5.14610845495831e-20	6.03482784273894e-19	1.83458766419264e-16	Significant
X3453.87	LYN	LYN	-0.0141675	0.00324027	1.47133233121223e-05	3.48756633030027e-05	0.052453	Significant
X15305.7	Secretagogin	SCGN	0.0340594	0.00435404	2.84703031680607e-14	2.37697027620928e-13	1.01496630794136e-10	Significant
X14318.1	VPS29	VPS29	-0.0617572	0.00662621	3.71710777014624e-19	4.1802805049121e-18	1.32514892005713e-15	Significant
X7194.36	NPTN	NPTN	0.0703305	0.00916625	7.76965297118133e-14	6.21049615297342e-13	2.76988128422614e-10	Significant
X21141.9	FA84B	LRATD2	0.0269095	0.00523791	3.90117584380387e-07	1.22426865168669e-06	0.00139077	Significant
X23569.53	STA10	STARD10	0.0762301	0.00946565	5.09685226495352e-15	4.50875392668965e-14	1.81702783245593e-11	Significant
X19241.31	RBP-III	RBP5	-0.0138053	0.00216381	3.80380989310746e-10	2.00008588037288e-09	1.35605822689281e-06	Significant
X14287.6	RAB5C	RAB5C	-0.00930871	0.00390536	0.0175046	0.0253263	1	Significant
X12345.4	APC10	ANAPC10	0.00571779	0.00108074	1.77835743596531e-07	5.96972152468581e-07	0.000633984	Significant
X8916.32	STIM1:CD	STIM1	0.00590687	0.00155416	0.00016073	0.000321369	0.573002	Significant
X24497.8	TRIML	TRIML1	-0.00970402	0.00176826	6.32779949284615e-08	2.27634764803194e-07	0.000225586	Significant
X8760.10	DCNL5	DCUN1D5	-0.0224469	0.00803634	0.00540417	0.00849465	1	Significant
X14291.53	AGAP2	AGAP2	0.0249487	0.00318877	2.65859484471892e-14	2.23009191092305e-13	9.47789062142295e-11	Significant
X7060.2	ERO1A	ERO1A	0.0122279	0.00425364	0.00421444	0.00673139	1	Significant
X23691.2	TTL12	TTLL12	-0.00824576	0.00219128	0.000186526	0.000367588	0.664967	Significant
X3381.24	LYNB	LYN	-0.0204392	0.0103789	0.049426	0.0661425	1	Significant
X12777.11	SF01	SF1	0.0059547	0.00114794	3.0197338610698e-07	9.68107123625345e-07	0.00107654	Significant
X24911.57	LRP	MVP	-0.00900533	0.00208754	1.9016859029082e-05	4.41374364835139e-05	0.0677951	Significant
X25486.38	RM38	MRPL38	-0.0187725	0.00239031	2.29453855900546e-14	1.92925234972983e-13	8.18002996285447e-11	Significant
X20445.29	AP1AR	AP1AR	0.151523	0.0158047	3.12552933882529e-20	3.7516875733711e-19	1.11425120929122e-16	Significant
X19581.15	IGFBP-5	IGFBP5	0.0128148	0.00416624	0.00220507	0.0037221	1	Significant
X12721.4	TAXB1	TAX1BP1	0.0453623	0.0056103	4.13279890422255e-15	3.69258849462491e-14	1.47334280935534e-11	Significant
X3421.54	CD30 Ligand	TNFSF8	0.0454392	0.00617928	7.09371862037899e-13	5.1505309331265e-12	2.52891068816511e-09	Significant
X4968.50	CAPG	CAPG	0.0185824	0.00750648	0.0136098	0.0200409	1	Significant
X12458.79	CHP1	CHP1	0.0571661	0.00716831	8.94320466647273e-15	7.77622552096958e-14	3.18825246359753e-11	Significant
X22955.28	CRBP	RBP1	0.0363336	0.00519499	7.84282025671444e-12	5.08357349367036e-11	2.7959654215187e-08	Significant
X11286.78	SELS	SELENOS	-0.0482316	0.0157047	0.00223779	0.00377196	1	Significant
X23403.64	BORG4	CDC42EP4	0.0219326	0.00777064	0.0049407	0.00781947	1	Significant
X12612.37	PSB1	PSMB1	0.0789232	0.0126754	9.54572703157301e-10	4.68095142607397e-09	3.40305168675578e-06	Significant
X22984.10	IF4A2	EIF4A2	0.0865173	0.0129294	5.60290088821434e-11	3.32351774816708e-10	1.99743416664841e-07	Significant
X18225.13	HEBP1	HEBP1	0.0482413	0.0108994	1.16626218768377e-05	2.8187964061645e-05	0.0415772	Significant
X21194.39	PO6F1	POU6F1	0.0187562	0.00389178	1.87281414113313e-06	5.1741852493126e-06	0.00667658	Significant
X19264.6	RFA2	RPA2	-0.00910403	0.0012836	4.09925689914237e-12	2.75213763567656e-11	1.46138508454425e-08	Significant
X23665.35	PRS6A	PSMC3	-0.0103838	0.0026294	8.94724676864268e-05	0.000185771	0.318969	Significant
X2642.4	PAFAH beta subunit	PAFAH1B2	0.0277796	0.00592471	3.48233680713094e-06	9.12833140986897e-06	0.0124145	Significant
X13240.170	SHAN1	SHANK1	0.0176914	0.00232784	1.32221998257687e-13	1.04285713227578e-12	4.71371423788654e-10	Significant
X12510.3	STAP1	STAP1	-0.0130469	0.00236318	5.22132444105407e-08	1.92168798064008e-07	0.00018614	Significant
X10396.6	Mcl-1	MCL1	0.0246621	0.00395996	9.52617581107905e-10	4.67779845268551e-09	3.39608167664968e-06	Significant
X24226.30	Fascin	FSCN1	0.0633994	0.00780511	3.04350966149758e-15	2.75383551858855e-14	1.08501119432389e-11	Significant
X11368.32	KAD2	AK2	0.0414864	0.00907378	5.98922653855815e-06	1.50469292529667e-05	0.0213516	Significant
X17393.13	SCAD	ACADS	0.0276019	0.00327883	3.44055567638619e-16	3.31502188819372e-15	1.22655809863168e-12	Significant
X8892.14	PEAR1:CD	PEAR1	0.00926792	0.00197886	3.57932114214677e-06	9.33451343946835e-06	0.0127603	Significant
X12620.3	Septin-11	SEPTIN11	0.057065	0.00763106	3.06466667940552e-13	2.31964686031437e-12	1.09255367120807e-09	Significant
X12603.87	PABP4	PABPC4	0.0170949	0.0028968	6.52178065309027e-09	2.78111818519938e-08	2.32501480282668e-05	Significant
X25260.62	CO017	FAM219B	0.00377993	0.00173372	0.0296706	0.0413995	1	Significant
X12486.8	GLRX2	GLRX2	0.0334327	0.00437589	1.02462725301703e-13	8.13540346771874e-13	3.65279615700571e-10	Significant
X3471.49	STK16	STK16	-0.0101864	0.00256635	8.17234713779625e-05	0.000170576	0.291344	Significant
X15693.9	PgR	PGR	0.0303708	0.00802588	0.000172075	0.000341943	0.613446	Significant
X23695.1	FSD1	FSD1	0.00771199	0.0013085	6.63884579231462e-09	2.82765654117104e-08	2.36674852496016e-05	Significant
X5620.13	AMD	PAM	0.0485888	0.0143853	0.000783126	0.00141002	1	Significant
X19228.11	BAG-2	BAG2	0.0152178	0.00220981	1.60084251262075e-11	1.00475414744595e-10	5.70700355749297e-08	Significant
X18904.23	KCC4	CAMK4	0.00931283	0.0020718	8.56151646838479e-06	2.11369849098281e-05	0.0305218	Significant
X9182.3	sLRP1:ECD	LRP1	0.0439986	0.00607685	1.51914250052649e-12	1.06191039497587e-11	5.41574301437694e-09	Significant
X23644.19	DAK	TKFC	0.0412637	0.00589602	8.00715574241169e-12	5.18067336146963e-11	2.85455102216977e-08	Significant
X22970.8	GIPC1	GIPC1	0.0235111	0.0038773	2.49454194541164e-09	1.148971839198e-08	8.8930420353925e-06	Significant
X19158.1	PAF	PCLAF	0.0743098	0.0116464	3.75441665277053e-10	1.98583017316423e-09	1.33844953671269e-06	Significant
X9459.7	Fas, soluble	FAS	0.035561	0.0094096	0.000174502	0.000346187	0.622098	Significant
X9027.10	NLGN2:CD	NLGN2	0.00707844	0.00147034	1.92372834548708e-06	5.30401512116121e-06	0.00685809	Significant
X8394.56	RNase 2	RNASE2	0.0144791	0.00274316	1.8861372614616e-07	6.29595443549682e-07	0.000672408	Significant
X9884.8	PPIL1	PPIL1	0.0183627	0.00279192	1.15782129681816e-10	6.57266389037697e-10	4.12763292315674e-07	Significant
X5110.84	NRX1B	NRXN1	0.0998508	0.0117487	1.8187987921114e-16	1.78623076966312e-15	6.48401769387714e-13	Significant
X20133.1	MAGE-3	MAGEA3	-0.0397449	0.00622996	3.79944580106343e-10	2.00008588037288e-09	1.35450242807911e-06	Significant
X17784.23	GMFB	GMFB	0.0639016	0.0105468	2.58738848727263e-09	1.18713512961736e-08	9.22403995712693e-06	Significant
X20439.14	PROSC	PLPBP	0.04543	0.00688064	9.91138269976262e-11	5.68072014865816e-10	3.53340793246537e-07	Significant
X20999.12	RL5	RPL5	-0.00956327	0.0034159	0.00530438	0.00835253	1	Significant
X21130.82	ITPK1	ITPK1	0.042038	0.00963705	1.53932975602152e-05	3.63424541736207e-05	0.0548771	Significant
X12691.44	GLYM	SHMT2	-0.0180473	0.00561588	0.00139281	0.00242096	1	Significant
X18181.2	TSSC4	TSSC4	0.0270354	0.00432881	8.54474800074296e-10	4.25447299199004e-09	3.04620266226487e-06	Significant
X19289.29	DCUP	UROD	0.0602514	0.00857547	6.49344494010568e-12	4.2553550021097e-11	2.31491312114767e-08	Significant
X9901.28	EGLN1	EGLN1	-0.0111139	0.00199974	4.29033875548245e-08	1.60662370412762e-07	0.000152951	Significant
X24011.27	VS10L	VSIG10L	-0.00588036	0.00215279	0.00651299	0.0101083	1	Significant
X25041.11	F264	PFKFB4	-0.00926353	0.00176937	2.36378132575863e-07	7.76671007034978e-07	0.000842688	Significant
X17456.53	GOLM1	GOLM1	0.0387624	0.00632881	1.74207629692085e-09	8.19327440438368e-09	6.21050199852283e-06	Significant
X21706.29	LIRA1	LILRA1	0.0597908	0.00957702	8.70707275848691e-10	4.31720645118301e-09	3.10407143840058e-06	Significant
X6962.5	DRB3	HLA-DRB3	0.0250542	0.00938783	0.00784223	0.0120041	1	Significant
X17751.68	CRBB1	CRYBB1	0.0272189	0.00551781	1.08145943591597e-06	3.10919587825841e-06	0.0038554	Significant
X14178.18	CDKN3	CDKN3	0.0185091	0.00371156	8.28269572355405e-07	2.42428655619624e-06	0.00295278	Significant
X7981.230	B3GT6	B3GALT6	0.0127509	0.00232004	5.99273302105799e-08	2.16454845188164e-07	0.000213641	Significant
X21895.36	IFNL4	None	-0.00906463	0.00126091	2.16315780709481e-12	1.48016460312725e-11	7.711657582293e-09	Significant
X20936.8	TATD3	TATDN3	0.0272456	0.00277472	4.84736981075701e-21	6.19386142485618e-20	1.72808733753487e-17	Significant
X17332.3	ARHL2	ADPRS	0.0790721	0.00745523	4.99593441758807e-24	7.64399407669591e-23	1.78105061987015e-20	Significant
X21105.23	U119B	UNC119B	0.0187308	0.0031043	3.03709593020152e-09	1.37053759381879e-08	1.08272469911684e-05	Significant
X9249.17	TMEM9:ECD	TMEM9	0.0540257	0.00819417	1.01859810645388e-10	5.81939463062193e-10	3.63130224950808e-07	Significant
X6304.8	C1QT1	C1QTNF1	0.0263358	0.00701852	0.000194135	0.000381318	0.692092	Significant
X5065.8	CD83	CD83	0.0473525	0.00716612	9.33837320124446e-11	5.38694182240073e-10	3.32913004624365e-07	Significant
X9793.145	IGDC4	IGDCC4	0.0427763	0.00685038	8.65504957390268e-10	4.29738882046839e-09	3.08552517309631e-06	Significant
X11204.80	CXAR	CXADR	0.0049738	0.00156549	0.00157175	0.00270822	1	Significant
X10576.7	PXDC2:ECD	PLXDC2	0.048408	0.00780378	1.10048176586535e-09	5.35227489128236e-09	3.92321749530997e-06	Significant
X24670.1	PIHD1	PIH1D1	0.0160505	0.00317944	6.13763481651558e-07	1.8464698836184e-06	0.00218807	Significant
X6511.17	F19A4	TAFA4	0.0187937	0.00314692	4.24514684341557e-09	1.88467602699583e-08	1.51339484967765e-05	Significant
X3073.51	IL-18 BPa	IL18BP	0.0391014	0.00643244	2.28823689973792e-09	1.06080163167304e-08	8.15756454756568e-06	Significant
X22588.35	AGRB2	ADGRB2	0.0830889	0.0111902	4.3253757928522e-13	3.2326970024147e-12	1.54199647015181e-09	Significant
X16057.6	IGF-II receptor	IGF2R	0.0537187	0.00754277	3.38849410569479e-12	2.28355037557692e-11	1.20799814868019e-08	Significant
X4991.12	GPC5	GPC5	0.0635512	0.00845849	2.36068468291096e-13	1.80597444089647e-12	8.41584089457757e-10	Significant
X19742.3	Septin-5	SEPTIN5	0.0315006	0.00568421	4.70189723060164e-08	1.74971436608506e-07	0.000167623	Significant
X8785.1	ARMC5:ARM 5	ARMC5	0.00630143	0.00101061	9.08000311187901e-10	4.48962705878622e-09	3.23702110938487e-06	Significant
X23416.47	Sorting nexin-15	SNX15	0.0674841	0.00824905	2.13229982326991e-15	1.93919614029521e-14	7.60164886995723e-12	Significant
X22043.174	HSP70 protein 2	HSPA2	0.0783095	0.00991499	1.57091006778834e-14	1.33978334728838e-13	5.60029439166543e-11	Significant
X5343.74	CBPE	CPE	0.0519528	0.00979065	1.63280040600045e-07	5.50182745500152e-07	0.000582093	Significant
X13544.9	HMHA1	ARHGAP45	-0.0115196	0.00318902	0.000332317	0.000629495	1	Significant
X8967.6	DUS26	DUSP26	0.0136046	0.00407439	0.000898179	0.00160502	1	Significant
X18215.5	THG1	THG1L	-0.0107391	0.00291545	0.00025517	0.000492518	0.909681	Significant
X8983.7	GOLM1	GOLM1	0.0384849	0.00682045	2.70024008495705e-08	1.05321180556585e-07	9.62635590287188e-05	Significant
X19262.219	ACADV	ACADVL	-0.00464297	0.00205555	0.0243019	0.0343505	1	Significant
X17792.158	SSDH	ALDH5A1	0.020701	0.0043218	2.17623595346914e-06	5.9268763744213e-06	0.00775828	Significant
X20054.28	Aconitase 1	ACO1	0.058218	0.00776165	2.62603843467913e-13	2.00039038881006e-12	9.3618270196311e-10	Significant
X8086.49	ITM2B	ITM2B	0.0277208	0.00609302	6.65105796568864e-06	1.66509983480899e-05	0.023711	Significant
X8748.45	HG2A	CD74	-0.0122747	0.00179453	2.14693561881089e-11	1.33808137780784e-10	7.65382548106082e-08	Significant
X13941.82	SYFM	FARS2	-0.00690171	0.00195237	0.000442328	0.000823876	1	Significant
X21770.18	B3GA1	B3GAT1	0.0688438	0.0108664	4.99130771361663e-10	2.58633895334931e-09	1.77940119990433e-06	Significant
X16875.13	MGN2	MAGOHB	-0.0102919	0.0023205	1.11583522993061e-05	2.70793233131561e-05	0.0397795	Significant
X15476.6	REG3G	REG3G	-0.0265303	0.0054331	1.38822483578876e-06	3.92779487268804e-06	0.00494902	Significant
X17778.19	RAB32	RAB32	-0.0112445	0.00237325	2.75551856470581e-06	7.33091319640016e-06	0.00982342	Significant
X21595.8	CCD43	CCDC43	0.0204794	0.00472092	1.72244794927836e-05	4.02921715169118e-05	0.0614053	Significant
X9999.1	IRF6	IRF6	-0.0241782	0.00487148	9.26606094582278e-07	2.69661283851904e-06	0.00330335	Significant
X20402.11	TPC2A	TRAPPC2	0.0124764	0.00337894	0.000245304	0.000476052	0.874508	Significant
X6294.11	BAGE2	BAGE2	0.0148476	0.00440252	0.000799537	0.00143594	1	Significant
X8889.5	CCPG1	CCPG1	0.0141988	0.00178417	1.05634450956988e-14	9.11832488284896e-14	3.76586817661662e-11	Significant
X11708.2	LCN1	LCN1	-0.0157833	0.00265633	5.10628426302286e-09	2.22269882755513e-08	1.82039033976765e-05	Significant
X10575.31	PUF60	PUF60	0.0506461	0.00715643	4.57887748917178e-12	3.06260755138788e-11	1.63236982488974e-08	Significant
X8405.108	ADAM 10:ECD	ADAM10	-0.0100247	0.00216155	4.44277449782625e-06	1.14110166316647e-05	0.0158385	Significant
X3800.71	CK-BB	CKB	0.00576861	0.00200314	0.004138	0.00662414	1	Significant
X12521.3	CDN2C	CDKN2C	-0.0115277	0.00215507	1.30302689672939e-07	4.44951234371674e-07	0.000464529	Significant
X20185.44	ODP2	DLAT	0.0057525	0.0010352	4.38833617495921e-08	1.6398761492379e-07	0.000156444	Significant
X14106.46	GDP/GTP exchange protein	RAP1GDS1	0.00448218	0.000943355	2.58836592897164e-06	6.9536733510052e-06	0.00922752	Significant
X16754.40	CSKP	CASK	0.014919	0.00246753	2.79542013474852e-09	1.27765035645878e-08	9.96567278037847e-06	Significant
X10006.25	ELK1	ELK1	-0.00891313	0.00180353	1.03030040371576e-06	2.97169978903453e-06	0.00367302	Significant
X12534.10	CACO2	CALCOCO2	0.0516492	0.00781673	9.31440284902803e-11	5.38182271584845e-10	3.32058461567849e-07	Significant
X18837.9	SGTB	SGTB	0.0643958	0.0108507	5.25004039795582e-09	2.27970694503197e-08	1.87163940187125e-05	Significant
X5598.3	GREM2	GREM2	0.0102933	0.00162801	5.39928236745761e-10	2.77355066858593e-09	1.92484416399864e-06	Significant
X7003.4	GLT10	GALNT10	0.00887251	0.00213069	3.6374008453731e-05	8.10965229127899e-05	0.129673	Significant
X21009.28	SNTAN	SNTN	0.00448905	0.00115314	0.000111379	0.000228199	0.397067	Significant
X6217.23	QSCN6	QSOX1	0.0414375	0.00818754	5.74650044982051e-07	1.73907250455094e-06	0.00204863	Significant
X25253.17	GNAS	GNAS|GNAS	-0.00735656	0.00136707	1.10344374537026e-07	3.8154965589185e-07	0.000393378	Significant
X5248.68	Cyclophilin F	PPIF	0.0141158	0.00369521	0.000149151	0.000299393	0.531723	Significant
X13516.46	TMM85	EMC4	0.0271328	0.0133957	0.0433007	0.0583618	1	Significant
X10064.12	RBBP9	RBBP9	0.00603599	0.00161275	0.000203174	0.000397538	0.724314	Significant
X3859.50	PSA1	PSMA1	0.0122011	0.00235899	3.2841116606374e-07	1.04627864791531e-06	0.00117079	Significant
X12704.26	SH2D3	SH2D3C	-0.00936625	0.00237456	9.09478083877055e-05	0.000188615	0.324229	Significant
X21247.16	METK1	MAT1A	0.00920595	0.00280908	0.00111679	0.00197278	1	Significant
X8923.94	GLTL1	GALNT16	0.0493673	0.00798853	1.27166360043014e-09	6.12469998403504e-09	4.53348073553345e-06	Significant
X20441.35	RPAB1	POLR2E	-0.0100167	0.00255741	0.000101465	0.00020921	0.361724	Significant
X8838.10	CASC4	GOLM2	0.0144485	0.00258862	3.79738251081573e-08	1.44324825704244e-07	0.000135377	Significant
X7717.95	CFTR	CFTR	0.0235214	0.00373361	6.23971423297496e-10	3.18234352511527e-09	2.22445812405557e-06	Significant
X13062.4	GMFG	GMFG	0.0389458	0.00714873	7.77210040562405e-08	2.75737182471682e-07	0.000277075	Significant
X23302.19	AKTS1	AKT1S1	0.0147911	0.0035793	4.15515040102667e-05	9.1778879675713e-05	0.148131	Significant
X13983.27	QOR	CRYZ	0.00452896	0.00211098	0.0323685	0.0446916	1	Significant
X12775.6	HMGB3	HMGB3	-0.0107509	0.00208817	3.67074754771364e-07	1.1642540042348e-06	0.00130862	Significant
X8908.14	KCE1L:CD	KCNE5	0.0772855	0.0113794	2.89712930551691e-11	1.76853869420681e-10	1.03282659741678e-07	Significant
X5744.12	CA056	MENT	0.016264	0.00287977	2.67476610594126e-08	1.04441852877115e-07	9.53554116768059e-05	Significant
X12825.18	DP13A	APPL1	-0.0049023	0.00228823	0.0326122	0.0450106	1	Significant
X19280.29	UB2D3	UBE2D3	0.0757955	0.0120961	7.47877117916983e-10	3.7446375356377e-09	2.66618192537404e-06	Significant
X7769.29	3BP2	SH3BP2	0.00446175	0.00188404	0.0182286	0.0262565	1	Significant
X10894.25	Secretagogin	SCGN	0.0176145	0.00427711	4.43151068211302e-05	9.7520590010697e-05	0.157983	Significant
X6372.7	YBOX2	YBX2	-0.0134482	0.00361812	0.000224243	0.000436939	0.799427	Significant
X13438.115	CHRD	CHRD	0.0403002	0.00835699	1.84264710224922e-06	5.10811580055869e-06	0.00656904	Significant
X21533.51	LSP1	LSP1	-0.0141973	0.00397179	0.000382645	0.000717962	1	Significant
X5452.71	ASGR1	ASGR1	-0.0122995	0.00204315	3.2021478860831e-09	1.43774020326023e-08	1.14156572138863e-05	Significant
X4992.49	GRN	GRN	0.0185412	0.00640643	0.003956	0.00636711	1	Significant
X12403.30	RB39B	RAB39B	0.0245675	0.00328077	2.86038989999096e-13	2.16963616882293e-12	1.01972899934678e-09	Significant
X23559.10	DDRGK	DDRGK1	0.057168	0.00849141	4.23992228090306e-11	2.54466716017162e-10	1.51153229314194e-07	Significant
X18925.24	Proteasome subunit alpha type 5	PSMA5	0.0368419	0.00603621	2.01312225245445e-09	9.41834754593191e-09	7.17678083000011e-06	Significant
X14083.25	SPS1	SEPHS1	0.0167282	0.00511724	0.00115204	0.00202716	1	Significant
X10945.11	Syntaxin-6	STX6	0.0442929	0.00630087	6.21843073120524e-12	4.09016707689053e-11	2.21687055567467e-08	Significant
X10000.28	CRBB2	CRYBB2	0.00316012	0.00131535	0.0166299	0.0241588	1	Significant
X12831.21	TESC	TESC	0.01965	0.0026765	7.9368306166581e-13	5.70459700572301e-12	2.82948011483861e-09	Significant
X3315.15	GPC2	GPC2	0.0260181	0.00336478	5.22418648978327e-14	4.2521061269583e-13	1.86242248360774e-10	Significant
X12652.37	SAHH2	AHCYL1	-0.00822156	0.00234213	0.00048466	0.000896634	1	Significant
X9013.60	NET1	NTN1	0.0525766	0.00698411	2.16293634980823e-13	1.66901906646458e-12	7.71086808706634e-10	Significant
X19279.42	CRBP	RBP1	0.026272	0.0043403	2.65224808067805e-09	1.21376950033598e-08	9.45526440761725e-06	Significant
X6405.74	PSG2	PSG2	-0.00865785	0.00212815	5.44633182231776e-05	0.000118031	0.194162	Significant
X12580.7	PSB5	PSMB5	0.0499901	0.00585799	1.56162985925399e-16	1.54216355906938e-15	5.56721044824047e-13	Significant
X5650.9	PDIA6	PDIA6	0.0673715	0.00852556	1.51082046086189e-14	1.29162468656418e-13	5.38607494297264e-11	Significant
X7928.183	TPST1	TPST1	0.0613856	0.00958202	3.34612524351428e-10	1.78576893609707e-09	1.19289364931284e-06	Significant
X13933.276	NAB1	NAB1	-0.0125881	0.00194059	1.98771324979167e-10	1.10205252496226e-09	7.0861977355073e-07	Significant
X10924.258	NEUFC	CYB5D2	0.014671	0.00365741	6.88812276131976e-05	0.000146168	0.245562	Significant
X2972.57	BMP-7	BMP7	0.0226284	0.0062217	0.000302151	0.000576951	1	Significant
X4423.77	BCL2-like 1 protein	BCL2L1	0.00687607	0.00118558	1.13802473002117e-08	4.70111026943855e-08	4.05705816252547e-05	Significant
X3835.11	TLR2	TLR2	-0.00420058	0.00199444	0.0356532	0.0488672	1	Significant
X15542.19	KCRU	CKMT1A	0.127547	0.012669	5.49359097477567e-22	7.47505794850201e-21	1.95846518250753e-18	Significant
X12619.14	Protein phophatase 2Ca	PPM1A	0.015486	0.00305813	5.64900919822672e-07	1.71102105281888e-06	0.00201387	Significant
X14151.4	UCRP	ISG15	0.0341545	0.00548573	9.81379346270887e-10	4.79920078114638e-09	3.49861736945571e-06	Significant
X8954.30	M4K1	MAP4K1	0.0336196	0.007271	4.8894077370824e-06	1.24416406728756e-05	0.0174307	Significant
X3813.3	FYN	FYN	0.00537875	0.00127942	3.06662638243015e-05	6.90620534009064e-05	0.109325	Significant
X6517.14	BMP-3b	GDF10	0.0102383	0.00222809	5.39915636928994e-06	1.3680165214299e-05	0.019248	Significant
X12392.30	ARL1	ARL1	-0.0116996	0.00330372	0.000433092	0.000807518	1	Significant
X7128.9	VWA2	VWA2	0.0361962	0.00585834	1.27304423230574e-09	6.12469998403504e-09	4.53840268816996e-06	Significant
X7934.11	NDRG4	NDRG4	0.0702057	0.00980698	2.61440849344981e-12	1.76857045145134e-11	9.32036627914857e-09	Significant
X23414.12	ZN483	ZNF483	-0.00929705	0.00355927	0.00924966	0.0140081	1	Significant
X9180.6	INGR2:ECD	IFNGR2	0.0194744	0.00294176	8.709187276789e-11	5.04849636451265e-10	3.10482526417528e-07	Significant
X2742.68	Siglec-7	SIGLEC7	0.0817544	0.0118894	1.67169671807518e-11	1.04738115991881e-10	5.95959879993802e-08	Significant
X21112.6	MLRS	MYLPF	-0.00706322	0.00282948	0.01287	0.0190301	1	Significant
X13937.75	CAND1	CAND1	0.15783	0.0157439	9.92045563406725e-22	1.31473696414311e-20	3.53664243354497e-18	Significant
X18824.7	IF4A2	EIF4A2	0.0375247	0.00621038	2.82727677523896e-09	1.29055591597015e-08	1.00792417037269e-05	Significant
X5493.17	WNK3	WNK3	0.028173	0.00620669	7.12885392381166e-06	1.77847195510067e-05	0.0254144	Significant
X15483.377	Agrin	AGRN	0.0455199	0.00780386	9.3762570020673e-09	3.91868185373622e-08	3.34263562123699e-05	Significant
X7105.7	CABL2	CABLES2	0.00521717	0.00261253	0.0463277	0.0622065	1	Significant
X5424.55	RANK	TNFRSF11A	0.0208692	0.00378661	5.53662181823506e-08	2.02649453614045e-07	0.000197381	Significant
X18868.7	CBX3	CBX3	-0.0123137	0.00187604	1.23698736572996e-10	7.01090613486058e-10	4.40985995882731e-07	Significant
X11369.23	ADHX	ADH5	-0.00891683	0.00211943	3.02758283249207e-05	6.8312232897685e-05	0.107933	Significant
X12578.13	ARF3	ARF3	0.0101979	0.00179718	2.29305484045136e-08	9.0528687776402e-08	8.1747405062091e-05	Significant
X24695.8	PKHB1	PLEKHB1	0.0506202	0.00878619	1.39403613475572e-08	5.69924176651851e-08	4.96973882040414e-05	Significant
X6966.144	STX1B	STX1B	0.0035797	0.00101145	0.000436533	0.000813507	1	Significant
X11128.29	T132C:CD	TMEM132C	0.0235395	0.00328319	2.57165131383221e-12	1.74960628507859e-11	9.16793693381183e-09	Significant
X10876.300	BRAT1	BRAT1	0.00257425	0.00124173	0.0386374	0.0525935	1	Significant
X17671.58	ING4	ING4	0.00559997	0.00196218	0.00449712	0.00715086	1	Significant
X5701.81	Tetranectin	CLEC3B	0.0313517	0.00483679	2.05029830063263e-10	1.12972387044132e-09	7.30931344175533e-07	Significant
X9451.20	Uromodulin	UMOD	0.0769538	0.0123687	9.81203654682349e-10	4.79920078114638e-09	3.49799102894257e-06	Significant
X14085.28	IL-13	IL13	0.0342163	0.0115434	0.00317018	0.00517884	1	Significant
X6064.4	TXNDC4	ERP44	0.0242609	0.00690951	0.000482857	0.000893761	1	Significant
X17722.5	FKBP52 protein	FKBP4	0.0632229	0.00808931	3.04472408449308e-14	2.53017281147269e-13	1.08544413612178e-10	Significant
X3197.70	IDE	IDE	-0.00838822	0.00234372	0.000377431	0.000708926	1	Significant
X7628.40	CREL1	CRELD1	0.0330437	0.0109211	0.00259883	0.00433747	1	Significant
X11180.17	SMRC1	SMARCC1	-0.00658162	0.00153532	2.15165430238378e-05	4.95519870025722e-05	0.0767065	Significant
X25265.8	FNBP1	FNBP1	-0.0104414	0.00217429	2.03131645994894e-06	5.57907795047609e-06	0.00724164	Significant
X15318.75	Calpactin I light chain	S100A10	-0.0175419	0.0046225	0.000165848	0.000330491	0.591248	Significant
X17797.1	CUL1	CUL1	0.00817427	0.00130921	8.82622100936709e-10	4.37020526366579e-09	3.14654778983937e-06	Significant
X9971.5	CSMD2	CSMD2	0.0379847	0.00694026	6.78030003660109e-08	2.42932358095305e-07	0.000241718	Significant
X16914.104	sCD14	CD14	0.0259892	0.00532205	1.37209929305657e-06	3.89453342336518e-06	0.00489153	Significant
X23621.326	TIM13	TIMM13	-0.0103758	0.00520743	0.0468162	0.0628151	1	Significant
X14134.49	AMGO2	AMIGO2	0.0558574	0.00940509	5.10045174424196e-09	2.22269882755513e-08	1.81831104682226e-05	Significant
X22094.15	CB073	C2orf73	0.00953491	0.00407334	0.0196048	0.0281365	1	Significant
X24681.2	SERB	PSPH	0.0107331	0.00497114	0.031282	0.0433257	1	Significant
X12587.65	ARL2	ARL2	-0.104287	0.0171826	2.39446006895666e-09	1.1071660370727e-08	8.53625014583049e-06	Significant
X19110.6	MEMO1	MEMO1	0.0202034	0.00291479	1.21318225956207e-11	7.70943806655754e-11	4.32499475533878e-08	Significant
X5029.3	SEPR	FAP	-0.00913768	0.0026423	0.000586963	0.0010764	1	Significant
X24651.1	RTN1	RTN1	0.0107927	0.00199889	1.00280472825412e-07	3.49120982053314e-07	0.0003575	Significant
X3221.54	SARP-2	SFRP1	0.0855885	0.0122172	7.25630694209129e-12	4.72920187359332e-11	2.58687342485554e-08	Significant
X3427.63	CSK21	CSNK2A1	-0.0117541	0.00230585	4.78470446459846e-07	1.47555981109805e-06	0.00170575	Significant
X11516.7	FABPL	FABP1	-0.010144	0.00256536	8.70017468154702e-05	0.000181063	0.310161	Significant
X9830.109	VAV3	VAV3	-0.00490703	0.00150107	0.00114792	0.0020219	1	Significant
X9305.89	INGR2:ECD	IFNGR2	0.0175535	0.00241207	1.22309566301387e-12	8.60026832079773e-12	4.36033603864445e-09	Significant
X11638.42	B3GT2	B3GALT2	0.0233226	0.00400888	1.02577148343898e-08	4.27704717948534e-08	3.65687533845996e-05	Significant
X22858.3	MK06	MAPK6	-0.0480538	0.00821169	8.37888942303359e-09	3.52249301805598e-08	2.98707407931147e-05	Significant
X19586.89	RAB3C	RAB3C	-0.013806	0.00261728	1.93682448543183e-07	6.45631623425517e-07	0.000690478	Significant
X4562.1	NXPH1	NXPH1	0.019492	0.006787	0.00423875	0.00676719	1	Significant
X15299.102	MESD2	MESD	0.0434798	0.00740107	7.37999741610459e-09	3.12466636441958e-08	2.63096907884129e-05	Significant
X4962.52	ARMEL	CDNF	0.0238162	0.00525156	7.08102332135304e-06	1.76901528665898e-05	0.0252438	Significant
X23030.4	Siglec-5	SIGLEC5	0.041029	0.0138063	0.00309914	0.00508076	1	Significant
X23037.37	UB2D3	UBE2D3	0.0216472	0.00530543	5.17933413328839e-05	0.000112794	0.184643	Significant
X18220.141	SRA1	SRA1	0.0108786	0.00190122	1.74571217186701e-08	7.00052181406737e-08	6.22346389270589e-05	Significant
X14148.2	UCRP	ISG15	0.0213587	0.00394577	9.46867772368269e-08	3.31915792378848e-07	0.000337558	Significant
X9758.17	RS4X	RPS4X	-0.0095004	0.00286363	0.000969992	0.00172728	1	Significant
X17804.102	PNPO	PNPO	0.00731176	0.0023059	0.00160696	0.00276353	1	Significant
X7110.2	DJB11	DNAJB11	0.0436398	0.00772917	2.63934727705618e-08	1.03171853538435e-07	9.40927304270528e-05	Significant
X16922.53	PLXB3	PLXNB3	0.0323933	0.00677941	2.27452644238543e-06	6.17099449551298e-06	0.00810869	Significant
X21221.67	Serpin B9	SERPINB9	0.0415225	0.00872712	2.51013607499922e-06	6.7587878454473e-06	0.00894864	Significant
X23617.15	HYPK	HYPK	-0.00776541	0.00212107	0.000275713	0.000529303	0.982915	Significant
X22041.26	MP2K5	MAP2K5	-0.00737548	0.00275292	0.00761752	0.0116852	1	Significant
X10938.13	sLFA-3	CD58	0.0126546	0.00531281	0.0175642	0.0254022	1	Significant
X5483.1	RGMA	RGMA	0.0265632	0.00419516	5.03535524600359e-10	2.60160021043519e-09	1.79510414520028e-06	Significant
X24671.15	ASC	PYCARD	0.0274928	0.00579368	2.67041316714705e-06	7.1257656743108e-06	0.00952002	Significant
X25094.9	ACSA	ACSS2	-0.00903485	0.0016525	6.96335738339669e-08	2.48990662706211e-07	0.000248244	Significant
X5509.7	EGF:ECD	EGF	0.0212746	0.00800254	0.00808055	0.0123424	1	Significant
X6375.75	XXLT1	XXYLT1	0.0852194	0.0128349	7.58075474401704e-11	4.42314086127999e-10	2.70253906624207e-07	Significant
X23296.29	SARP-3	SFRP5	0.0629555	0.0176787	0.000401758	0.000751846	1	Significant
X14093.10	Flt3 ligand	FLT3LG	0.00831623	0.00232564	0.000380313	0.000713963	1	Significant
X13653.335	MACD1	MACROD1	-0.00671034	0.00178269	0.000185245	0.000365872	0.6604	Significant
X18166.4	RHOB	RHOB	0.0127554	0.00209346	2.11325202186149e-09	9.86092075646101e-09	7.53374345793621e-06	Significant
X14186.13	RFFL	RFFL	0.0169545	0.00470646	0.000344366	0.000650936	1	Significant
X11348.132	P4HA2	P4HA2	0.0138892	0.00238871	1.0537739086451e-08	4.37844287216758e-08	3.75670398431978e-05	Significant
X12754.14	CSDC2	CSDC2	0.0076017	0.00181688	3.34379441381124e-05	7.49253745143751e-05	0.119206	Significant
X9751.72	NSEP1	YBX1	-0.0117497	0.00351368	0.000885145	0.00158411	1	Significant
X19126.4	C20orf77	RPRD1B	-0.0113142	0.00242687	3.94164813679201e-06	1.02047753142073e-05	0.014052	Significant
X8476.11	CgA	CHGA	0.147166	0.0194586	1.71355462316427e-13	1.33672258896731e-12	6.10882223158062e-10	Significant
X23364.3	UCK1	UCK1	-0.0130104	0.00234557	4.55412538727858e-08	1.69649498491621e-07	0.000162355	Significant
X12477.42	TSN	TSN	0.0169019	0.0028012	3.12436717405187e-09	1.40635971912815e-08	1.11383689754949e-05	Significant
X19215.7	NDRG1	NDRG1	0.0165207	0.00228214	1.55831360943556e-12	1.08503672219488e-11	5.55538801763777e-09	Significant
X6649.51	NET1	NTN1	0.0421366	0.00590254	3.04232237590664e-12	2.05414380115666e-11	1.08458792701072e-08	Significant
X19291.2	CASQ2	CASQ2	0.0110958	0.00291773	0.000159425	0.000319119	0.56835	Significant
X11117.2	SPT20	SPATA20	0.0054665	0.00210949	0.00982307	0.0148198	1	Significant
X24417.22	RABE1	RABEP1	-0.0139079	0.00218474	4.16228135823175e-10	2.16937617574506e-09	1.48385330420962e-06	Significant
X6556.5	ENPP5	ENPP5	0.0458069	0.00920329	8.67371096661062e-07	2.53457209803007e-06	0.00309218	Significant
X22547.17	RBMS1	RBMS1	-0.0100864	0.00222614	7.23657979672898e-06	1.80279275448036e-05	0.0257984	Significant
X21478.20	SMAD5	SMAD5	0.0332362	0.00426878	3.70358724033963e-14	3.04510995766956e-13	1.32032885118108e-10	Significant
X22992.6	MARE3	MAPRE3	0.0102983	0.00134259	8.31126396024218e-14	6.62855839334751e-13	2.96296560182634e-10	Significant
X3676.15	IGF-II receptor	IGF2R	0.0443707	0.00734994	2.90735155990017e-09	1.31866517952215e-08	1.03647083110441e-05	Significant
X7173.141	T132C:ECD	TMEM132C	0.0683567	0.00935893	9.9553582255106e-13	7.06989085138352e-12	3.54908520739453e-09	Significant
X11833.83	FRDA	FXN	0.00829909	0.00112194	5.26735914631002e-13	3.89587870468781e-12	1.87781353565952e-09	Significant
X19282.3	RAB13	RAB13	0.0451198	0.00674918	5.80985716194548e-11	3.44055494723183e-10	2.07121407823356e-07	Significant
X6572.10	LRRT4:ECD	LRRTM4	0.00896513	0.00137015	1.40283897906646e-10	7.90066502428425e-10	5.00112096037193e-07	Significant
X9296.15	PTPRD	PTPRD	0.0671293	0.00912844	7.04385333891243e-13	5.12476268433119e-12	2.51113371532228e-09	Significant
X10749.18	HSP 70	HSPA1A	0.0840109	0.00934435	4.04067051523307e-18	4.33885252614635e-17	1.44049903868059e-14	Significant
X17748.21	QORX	TP53I3	0.0471658	0.00796578	5.81648816339257e-09	2.50130039837087e-08	2.07357803024945e-05	Significant
X9846.32	Rho-GDI beta	ARHGDIB	0.0413967	0.00742531	3.9098820071989e-08	1.48021163972982e-07	0.000139387	Significant
X22783.40	SPI1	SPI1	-0.0127112	0.00317548	7.14311620619412e-05	0.00015086	0.254652	Significant
X24891.54	ES8L2	EPS8L2	0.0191406	0.00302877	5.4706483732947e-10	2.80213526591891e-09	1.95028614507956e-06	Significant
X5018.68	Peroxiredoxin-6	PRDX6	0.0736818	0.011038	6.36416252430279e-11	3.74393389424743e-10	2.26882393991394e-07	Significant
X9275.2	Siglec-5	SIGLEC5	0.0541424	0.0144717	0.000203524	0.000398005	0.725563	Significant
X20398.60	POP7	POP7	-0.0108959	0.00434238	0.0123939	0.0183641	1	Significant
X9242.11	BTC	BTC	0.0408683	0.00804498	5.21707552546086e-07	1.59336735016377e-06	0.00185989	Significant
X19272.9	PEF1	PEF1	0.0451676	0.00707569	3.69651168574275e-10	1.96140450794774e-09	1.31780641596729e-06	Significant
X17698.15	WBP2	WBP2	0.0169036	0.00393567	2.08314098869253e-05	4.80672985416755e-05	0.074264	Significant
X13492.44	HSPA9B	HSPA9	0.021145	0.00339391	9.45960890868554e-10	4.65794278445635e-09	3.3723505759464e-06	Significant
X18182.24	PCKGC	PCK1	-0.0113108	0.00235169	1.96004502828206e-06	5.39579963384212e-06	0.00698756	Significant
X15607.56	KPYR	PKLR	-0.00808481	0.00268284	0.00271597	0.00450765	1	Significant
X3898.5	PSD7	PSMD7	-0.0129573	0.00232923	4.24726806304184e-08	1.59216726022546e-07	0.000151415	Significant
X2968.61	TNFSF15	TNFSF15	0.0216739	0.00589531	0.000259862	0.00050022	0.926407	Significant
X8587.21	ISK52	SPINK14	0.0080221	0.00133206	3.17669734949909e-09	1.42811173404341e-08	1.13249260509643e-05	Significant
X22788.10	ST6B1	SULT6B1	-0.00818977	0.0020009	4.92257910068685e-05	0.000107531	0.17549	Significant
X8660.5	OLFL3	OLFML3	0.0431304	0.00953245	7.48124760555327e-06	1.86117569531036e-05	0.0266706	Significant
X5090.49	ILT-2	LILRB1	0.0563032	0.012779	1.26952591427781e-05	3.05388656167368e-05	0.0452586	Significant
X12627.97	ATG7	ATG7	-0.0295653	0.00395715	3.22351660640843e-13	2.42956378474547e-12	1.14918367018461e-09	Significant
X13122.19	FLRT2	FLRT2	0.0393589	0.0069106	2.02879821389717e-08	8.06317238856568e-08	7.23266563254341e-05	Significant
X8905.20	KCMB3	KCNMB3	0.016685	0.00412758	6.05585571931169e-05	0.00013029	0.215891	Significant
X24926.9	FUBP2	KHSRP	0.0112817	0.00346024	0.00118511	0.00208329	1	Significant
X14633.26	T185A	TMEM185A	-0.0111538	0.00250979	1.07214139363839e-05	2.61256600705459e-05	0.0382218	Significant
X25298.53	KDM4C	KDM4C	-0.0138535	0.00210411	1.09358048077774e-10	6.23778306235623e-10	3.89861441397264e-07	Significant
X10080.9	EI2BA	EIF2B1	-0.00678174	0.00230996	0.0034686	0.00563095	1	Significant
X5846.24	Noggin	NOG	0.04479	0.00746335	3.58744871420212e-09	1.601757367041e-08	1.27892546661306e-05	Significant
X12508.9	CHMP3	CHMP3	0.00770616	0.00189332	5.40136899913032e-05	0.0001172	0.192559	Significant
X11310.8	Desmoglein-3	DSG3	-0.0114355	0.00232413	1.14732562036666e-06	3.28795485257809e-06	0.00409022	Significant
X15453.3	a1-Microglobulin	AMBP	-0.0345524	0.0084228	4.71790838005003e-05	0.00010344	0.168193	Significant
X3347.9	BARK1	GRK2	-0.00909091	0.0033178	0.00635022	0.00987289	1	Significant
X21583.14	RL26L	RPL26L1	-0.0242577	0.00671062	0.00032979	0.00062504	1	Significant
X5078.82	EphB6	EPHB6	0.0743132	0.0113738	1.47196620664022e-10	8.27690777077663e-10	5.24755952667238e-07	Significant
X22817.126	TRIM9	TRIM9	0.019662	0.00268661	9.24189753496611e-13	6.58947294243084e-12	3.29473647121542e-09	Significant
X20935.4	PDCL3	PDCL3	0.0176991	0.00322835	6.50728209134935e-08	2.33619946179863e-07	0.000231985	Significant
X5728.60	FCRL1	FCRL1	-0.0143528	0.00232028	1.22848915785866e-09	5.94242041759311e-09	4.37956384776612e-06	Significant
X12764.3	ELMO1	ELMO1	-0.0161431	0.00364004	1.12401878204196e-05	2.72408358802147e-05	0.0400713	Significant
X23282.19	RAB37	RAB37	-0.0124981	0.0020496	2.0545124211384e-09	9.59939289824167e-09	7.3243367813584e-06	Significant
X8248.222	SIG14	SIGLEC14	0.0639956	0.0158557	6.25468570053214e-05	0.000134002	0.22298	Significant
X10981.56	NRG3	NRG3	0.059178	0.00912536	1.98622543614176e-10	1.10205252496226e-09	7.08089367984537e-07	Significant
X24981.8	DC1L1	DYNC1LI1	0.00607011	0.00202039	0.00278365	0.00460711	1	Significant
X23031.6	SIRT2	SIRT2	0.00811809	0.00203883	7.77091088768189e-05	0.000162578	0.277033	Significant
X20074.3	LAMA3	LAMA3	0.0059912	0.00191569	0.00185841	0.00317563	1	Significant
X7975.97	UNC5A	UNC5A	0.0714037	0.0107313	6.93753641590449e-11	4.05447824962287e-10	2.47323173226995e-07	Significant
X3294.55	CFC1	CFC1	0.0426933	0.00556223	7.57832098872744e-14	6.07117175838502e-13	2.70167143248133e-10	Significant
X2841.13	sFRP-3	FRZB	0.0560496	0.0116554	1.97189751788516e-06	5.42423970004676e-06	0.00702981	Significant
X16792.4	Siglec-5	SIGLEC5	0.0470737	0.0153334	0.00225211	0.00379431	1	Significant
X10562.42	NETO2	NETO2	0.0313625	0.00934298	0.000845423	0.00151606	1	Significant
X18299.13	CPNS1	CAPNS1	0.0732098	0.00975286	2.48647054403282e-13	1.89813008339979e-12	8.864267489477e-10	Significant
X12799.65	DJC27	DNAJC27	0.00658329	0.00117554	3.41235063182309e-08	1.30526072987654e-07	0.00012165	Significant
X24937.7	RHG26	ARHGAP26	-0.010077	0.00217676	4.59192623323364e-06	1.17517710132648e-05	0.0163702	Significant
X19574.5	gpIIbIIIa	ITGA2B|ITGB3	-0.0120394	0.00234627	4.07364282650639e-07	1.27614557789941e-06	0.00145225	Significant
X18312.68	NDRG3	NDRG3	0.0839352	0.011231	3.10095354591103e-13	2.34213970151967e-12	1.10548993911728e-09	Significant
X5903.91	HSP70 protein 8	HSPA8	0.0458537	0.00540773	2.25387951939572e-16	2.20139191414952e-15	8.03508048664574e-13	Significant
X3210.1	METAP1	METAP1	-0.0127645	0.00270485	3.01228251056171e-06	7.96055385482023e-06	0.0107388	Significant
X5012.67	Myokinase, human	AK1	0.0666355	0.00973576	2.32773057428349e-11	1.44319295605576e-10	8.29835949732064e-08	Significant
X12387.7	PDLI4	PDLIM4	0.0638757	0.00567758	1.52047652791348e-26	2.64414576683491e-25	5.42049882201156e-23	Significant
X11083.23	NSE	ENO2	0.114153	0.0246786	4.67097217027774e-06	1.19454919562698e-05	0.016652	Significant
X24723.58	eIF-2-beta	EIF2S2	-0.00913008	0.00195945	4.00901338088621e-06	1.03641281384042e-05	0.0142921	Significant
X12939.1	RPAC1	POLR1C	-0.0106095	0.00279351	0.00016253	0.000324786	0.579418	Significant
X22587.37	EPHA6	EPHA6	0.0651109	0.00939995	1.20938063114452e-11	7.69900348219681e-11	4.31144195003021e-08	Significant
X19488.1	PDCD6	PDCD6	0.00775885	0.0037835	0.0407795	0.0552352	1	Significant
X11288.26	5NTC	NT5C2	-0.00880564	0.00168567	2.50367473184882e-07	8.17362675736359e-07	0.00089256	Significant
X10910.6	CEAM4	CEACAM4	-0.00904676	0.00297657	0.00249067	0.00417454	1	Significant
X20941.7	UBL3	UBL3	0.0722139	0.0100851	2.60087417772589e-12	1.76275978015072e-11	9.2721164435928e-09	Significant
X9595.11	B4GT2	B4GALT2	0.0848913	0.0148768	1.90385581939495e-08	7.59199775854921e-08	6.787245996143e-05	Significant
X2681.23	HGF	HGF	0.0396088	0.00851012	4.09003954250527e-06	1.05582845539691e-05	0.014581	Significant
X18842.24	UB2D2	UBE2D2	0.0374939	0.00551011	2.83501832780647e-11	1.73657050491926e-10	1.01068403386301e-07	Significant
X23289.25	NGN1	NEUROG1	0.00698502	0.00225011	0.002008	0.00340557	1	Significant
X14097.86	ST4S6	CHST15	0.0870288	0.016501	1.93961141287161e-07	6.45631623425517e-07	0.000691471	Significant
X9509.4	TM38B	TMEM38B	0.0157205	0.00453064	0.00056186	0.00103249	1	Significant
X17454.15	EGFL6	EGFL6	0.0034548	0.00128274	0.00729384	0.0112419	1	Significant
X8866.53	QPCTL	QPCTL	0.0492454	0.0109839	8.95156724263127e-06	2.2038906919876e-05	0.0319123	Significant
X11383.41	Keratin 7	KRT7	-0.00852783	0.00227923	0.000202777	0.00039698	0.722901	Significant
X13620.10	ASNA	GET3	-0.00904135	0.00256208	0.000453057	0.00084254	1	Significant
X3795.6	ADAM 9	ADAM9	0.0562327	0.00785011	2.57764021238816e-12	1.75034044898358e-11	9.18928735716379e-09	Significant
X15313.28	MD2L1	MAD2L1	0.0120044	0.00194225	1.24998807502574e-09	6.03822152773274e-09	4.45620748746676e-06	Significant
X11643.73	DTX3L	DTX3L	-0.012943	0.00237625	7.80666411847162e-08	2.76647689685401e-07	0.000278308	Significant
X20939.113	NHP2	NHP2	-0.0104409	0.00260214	6.8567629935031e-05	0.000145589	0.244444	Significant
X12750.9	LFA-1 beta-2	ITGB2	0.00961528	0.00240655	7.34771792692881e-05	0.000154177	0.261946	Significant
X11142.11	ANGL1:C-term	ANGPTL1	0.042844	0.00709231	2.84320635004683e-09	1.29616760075664e-08	1.01360306379169e-05	Significant
X7146.16	PDIA4	PDIA4	0.00485918	0.00102285	2.60628520607923e-06	6.98602012005448e-06	0.00929141	Significant
X21891.31	FBLN7	FBLN7	0.0555955	0.00842715	9.90500413788265e-11	5.68072014865816e-10	3.53113397515516e-07	Significant
X11431.235	RECQ1	RECQL	-0.021269	0.0104859	0.0430245	0.0580335	1	Significant
X22488.17	KLF9	KLF9	0.0171776	0.00305938	3.18864000681286e-08	1.2289190945176e-07	0.000113675	Significant
X11277.23	ATF6A	ATF6	0.0623894	0.00969594	2.71408022707856e-10	1.47270867725039e-09	9.67569600953507e-07	Significant
X7853.19	SCO1	SCO1	-0.00996393	0.00207982	2.14681637653255e-06	5.86152597702289e-06	0.0076534	Significant
X21577.35	FKBP5	FKBP5	-0.00737877	0.00201881	0.000282158	0.000540512	1	Significant
X12593.33	PDRG1	PDRG1	-0.00679841	0.00170108	7.31444070942436e-05	0.000153569	0.26076	Significant
X17782.23	THIK	ACAA1	0.010839	0.00261552	3.97184112400854e-05	8.80572985515575e-05	0.141596	Significant
X9223.11	ARMET	MANF	0.0252255	0.00594975	2.62836924655447e-05	5.98348426817796e-05	0.0937014	Significant
X13119.26	protein Z inhibitor	SERPINA10	-0.0126423	0.00318304	8.11094182739411e-05	0.000169394	0.289155	Significant
X9202.309	ATPO	ATP5PO	-0.00791684	0.00372912	0.0342212	0.0470855	1	Significant
X4469.78	ST4S6	CHST15	0.0881074	0.016624	1.69820195075743e-07	5.71140561740588e-07	0.000605409	Significant
X9366.54	IL-21 sR	IL21R	-0.011961	0.00247788	1.80316254567696e-06	5.00644429543486e-06	0.00642827	Significant
X21001.393	BRK1	BRK1	-0.0103589	0.00152536	2.9575384339141e-11	1.79925333052965e-10	1.05436245169038e-07	Significant
X13566.2	SSU72	SSU72	-0.0108088	0.00281509	0.000137874	0.000279115	0.491521	Significant
X11313.100	PHS	PCBD1	0.0409538	0.00519039	1.6960597392902e-14	1.44306753474214e-13	6.04645297056956e-11	Significant
X23246.67	BL1S1	BLOC1S1	0.00585138	0.00211075	0.00575759	0.00901046	1	Significant
X17738.7	CRNN	CRNN	0.00451964	0.00141857	0.00152757	0.00263591	1	Significant
X8778.3	Noggin	NOG	0.0290323	0.00449944	2.45361181099037e-10	1.33952926587759e-09	8.74712610618067e-07	Significant
X5748.20	Acid ceramidase	ASAH1	-0.0138788	0.00203797	2.60129369740656e-11	1.60166010902494e-10	9.27361203125439e-08	Significant
X23375.4	RFPL3	RFPL3	-0.0131637	0.00302221	1.58962195897751e-05	3.74801738343573e-05	0.05667	Significant
X7980.72	B3GN2	B3GNT2	0.0788401	0.0125115	6.08864585816343e-10	3.1097453415978e-09	2.17060224843526e-06	Significant
X4719.58	Protein disulfide isomerase A3	PDIA3	0.0254321	0.00530886	2.14856834660631e-06	5.86152597702289e-06	0.00765965	Significant
X7175.4	PCDG2	PCDHGA2	-0.0175409	0.0023903	7.96719874839456e-13	5.71490212032728e-12	2.84030635380266e-09	Significant
X18411.83	ARL15	ARL15	0.0119886	0.00585835	0.0411975	0.0557801	1	Significant
X19578.19	DOK2	DOK2	-0.00990613	0.00276529	0.000371404	0.000698341	1	Significant
X13073.14	AN32A	ANP32A	-0.00629902	0.00183992	0.000664432	0.00120852	1	Significant
X13083.18	SYVC	VARS1	-0.00981303	0.00215114	6.28049285345102e-06	1.5767575367995e-05	0.02239	Significant
X8064.125	Poliovirus receptor	PVR	-0.0073512	0.00193754	0.00016494	0.00032905	0.588012	Significant
X19332.1	MOBL3	MOB4	-0.024338	0.00503368	1.73252825495809e-06	4.82536189759812e-06	0.00617646	Significant
X17692.2	BT3A3	BTN3A3	0.0162069	0.00368625	1.32742466557957e-05	3.18028826128439e-05	0.0473227	Significant
X9805.51	SEM4B	SEMA4B	0.0130826	0.00235445	4.36619354961027e-08	1.63331374652262e-07	0.000155655	Significant
X21236.12	TMED9	TMED9	0.0542858	0.00886038	1.71350933309129e-09	8.06956508912873e-09	6.10866077247045e-06	Significant
X7244.16	TM149	IGFLR1	0.0579317	0.0102736	2.7485110092602e-08	1.0696988807874e-07	9.79844174801261e-05	Significant
X21135.16	SF3B6	SF3B6	-0.00994843	0.00181303	6.26800082518469e-08	2.25711342846297e-07	0.000223454	Significant
X25033.194	TER ATPase	VCP	-0.00899468	0.00319452	0.00504359	0.00797004	1	Significant
X6334.9	GGT2	GGT2	0.0447224	0.00638313	7.32992132725654e-12	4.76846159337036e-11	2.61311695316696e-08	Significant
X6036.78	EPHAA	EPHA10	0.0116507	0.00354467	0.00107934	0.00191055	1	Significant
X14603.51	KIAA0040	KIAA0040	0.00907772	0.00260484	0.00053262	0.000980274	1	Significant
X12438.127	3MG	MPG	-0.0101406	0.00217871	4.09341057946632e-06	1.05593406047738e-05	0.014593	Significant
X3340.53	TSP4	THBS4	0.0641324	0.0101887	6.43008958544386e-10	3.26542298747968e-09	2.29232693721074e-06	Significant
X3290.50	CD109	CD109	0.0500209	0.00814732	1.59153224319217e-09	7.54496336034586e-09	5.67381244698009e-06	Significant
X3195.50	Granulysin	GNLY	0.0530696	0.0171584	0.00208409	0.00352624	1	Significant
X14102.6	Granulysin	GNLY	0.0636316	0.019557	0.00121017	0.0021242	1	Significant
X11395.5	FAK2:FERM	PTK2B	-0.0105722	0.00205639	3.81510396620209e-07	1.2014881306988e-06	0.00136008	Significant
X4978.54	DBNL	DBNL	0.0300557	0.00698802	2.017907917115e-05	4.67132579513959e-05	0.0719384	Significant
X21813.171	MGT5A	MGAT5	0.0847605	0.0131237	2.3970673333188e-10	1.31066641768122e-09	8.54554504328152e-07	Significant
X5226.36	CK2-A2:B	CSNK2A2|CSNK2B	-0.0115481	0.00295595	0.000105684	0.000217405	0.376763	Significant
X8327.26	DPEP2	DPEP2	0.0334138	0.00817319	4.99822922680635e-05	0.000109116	0.178187	Significant
X3362.61	CRDL1	CHRDL1	0.0450871	0.0140013	0.0013577	0.00236222	1	Significant
X18375.28	IL-1F5	IL36RN	-0.00881238	0.00242732	0.000309587	0.000590203	1	Significant
X22946.55	Alpha-1-syntrophin	SNTA1	0.00786022	0.00196501	7.21114609277213e-05	0.000151847	0.257077	Significant
X14614.41	CA130	NCMAP	0.0286464	0.0109036	0.0088539	0.0134602	1	Significant
X23545.6	NDEL1	NDEL1	-0.0102881	0.00182986	3.03434548884494e-08	1.17198717960262e-07	0.000108174	Significant
X2573.20	IL-6	IL6	-0.0150878	0.00326511	4.79277561275134e-06	1.22044607567561e-05	0.0170862	Significant
X5006.71	MK13	MAPK13	-0.011199	0.00215565	2.90155510999447e-07	9.33577975372769e-07	0.0010344	Significant
X11487.4	Testican-1	SPOCK1	0.0476897	0.00720648	8.70474769354567e-11	5.04849636451265e-10	3.10324255274903e-07	Significant
X3592.4	CAMK1	CAMK1	0.0172459	0.00428488	6.52970072141197e-05	0.000138975	0.232784	Significant
X24948.79	PSPC1	PSPC1	-0.0137837	0.00234061	6.8032866486325e-09	2.88734725028272e-08	2.42537169023749e-05	Significant
X24217.2	Calgranulin A	S100A8	-0.0105475	0.00264316	7.49877062417365e-05	0.000157254	0.267331	Significant
X5723.4	INSL3	INSL3	-0.009034	0.00312809	0.00403518	0.00647409	1	Significant
X13130.150	HXK2	HK2	-0.0110873	0.00273182	5.65727022520133e-05	0.000122157	0.201682	Significant
X9028.5	PAPD1	MTPAP	0.00404699	0.000908414	1.02546324293524e-05	2.50567269435513e-05	0.0365578	Significant
X20388.8	TSR2	TSR2	0.0162961	0.00503491	0.0012838	0.00224571	1	Significant
X9401.57	CB089	TRABD2A	0.0257049	0.00470107	6.94508235236589e-08	2.48586531989803e-07	0.000247592	Significant
X2948.58	Growth hormone receptor	GHR	-0.0353766	0.00941934	0.000191393	0.000376147	0.682316	Significant
X9456.34	IL-22BP	IL22RA2	0.00336584	0.00104325	0.0013297	0.00231903	1	Significant
X25907.47	EMAL2	EML2	-0.00899821	0.00175775	4.26924025136393e-07	1.33156968469925e-06	0.00152198	Significant
X24706.73	CFDP1	CFDP1	-0.0129276	0.00225351	1.61425610877402e-08	6.53957162247657e-08	5.75482302777938e-05	Significant
X10940.25	SRCA	SRL	-0.0140653	0.00189715	4.79413023532491e-13	3.5680739642867e-12	1.70910742889333e-09	Significant
X24432.3	GRAP1	GRIPAP1	-0.013116	0.002241	8.33728416273002e-09	3.51328818441283e-08	2.97224180401325e-05	Significant
X12845.18	SNX17	SNX17	-0.0134123	0.00239116	3.25903934040143e-08	1.25021535478211e-07	0.000116185	Significant
X3317.33	HTRA2	HTRA2	0.0713575	0.00949659	2.33225565285284e-13	1.79191625052163e-12	8.31449140242037e-10	Significant
X17832.12	IDI2	IDI2	-0.00639649	0.00275897	0.0208331	0.0297437	1	Significant
X18191.23	RANG	RANBP1	-0.00618134	0.00206449	0.00288286	0.00476247	1	Significant
X6172.7	PolyUbiquitin K63	UBC	0.0391596	0.0056365	1.11173935004737e-11	7.1027791808582e-11	3.96335078291887e-08	Significant
X9815.5	RHG01:CRAL-TRIO	ARHGAP1	0.0563485	0.00705875	8.78648905031149e-15	7.65863898884119e-14	3.13238334643605e-11	Significant
X10445.20	ApoM	APOM	-0.019834	0.00913218	0.0302961	0.0421075	1	Significant
X4246.40	NCAM-L1	L1CAM	0.0686322	0.00954093	2.08158498514466e-12	1.43259661622408e-11	7.42085047204071e-09	Significant
X22142.4	F86B1	FAM86B1	0.0127458	0.00200909	4.70794697785955e-10	2.44662259126375e-09	1.67838309760693e-06	Significant
X8396.42	FAAH2	FAAH2	0.0103904	0.00189054	6.03986708526931e-08	2.17936499584869e-07	0.000215321	Significant
X7831.39	RBP	RBP4	-0.0230915	0.00462854	8.16871057165584e-07	2.39682642457291e-06	0.00291215	Significant
X12498.12	TX1B3	TAX1BP3	0.0174638	0.00275961	5.19000373384154e-10	2.67762131854488e-09	1.85023633111451e-06	Significant
X12513.8	GLTP	GLTP	0.00551773	0.00177041	0.00192678	0.00328032	1	Significant
X19271.64	GNAI1	GNAI1	0.00732123	0.00254062	0.00411196	0.00658542	1	Significant
X18327.6	SNX5	SNX5	-0.00526501	0.00173652	0.00254528	0.00425805	1	Significant
X7012.35	VNN2	VNN2	-0.0108978	0.00231406	3.15927018242635e-06	8.31816706081975e-06	0.0112628	Significant
X14088.38	IGFBP-6	IGFBP6	-0.00357139	0.00110792	0.0013427	0.00233841	1	Significant
X17729.20	UBE2S	UBE2S	0.00371204	0.00107549	0.000601643	0.00110219	1	Significant
X23645.49	HACL1	HACL1	-0.0127744	0.00399282	0.00145808	0.00252629	1	Significant
X9876.20	aldolase C	ALDOC	0.0360158	0.00561515	3.06484198872017e-10	1.63810520086768e-09	1.09261616897874e-06	Significant
X21345.93	RDH12	RDH12	0.0189978	0.0047266	6.67241675938133e-05	0.000141928	0.237872	Significant
X9543.131	COG8	COG8	0.00867642	0.00178015	1.44142068845911e-06	4.06218557656658e-06	0.00513866	Significant
X12448.246	NMT1	NMT1	-0.0111707	0.00359015	0.00196517	0.0033393	1	Significant
X24955.116	ZHX2	ZHX2	-0.0134911	0.00231376	9.50100422111497e-09	3.96616862391977e-08	3.38710800482749e-05	Significant
X23224.11	RGN	RGN	0.0102051	0.00297247	0.000642177	0.00117163	1	Significant
X4911.49	Glutathione S-transferase Pi	GSTP1	0.0785844	0.0115995	3.21696070465768e-11	1.95041920273888e-10	1.14684649121046e-07	Significant
X13590.1	ORN	REXO2	0.0879419	0.0090061	7.76052041223735e-21	9.70745798934251e-20	2.76662552696262e-17	Significant
X24940.3	IKK-beta	IKBKB	0.029218	0.00519261	2.9608901680765e-08	1.1448561224721e-07	0.000105556	Significant
X12940.35	AL3B1	ALDH3B1	-0.0117667	0.00229412	4.04854682106044e-07	1.26939924512581e-06	0.00144331	Significant
X22001.23	PADI2	PADI2	-0.00697732	0.00205481	0.000735152	0.00132902	1	Significant
X6961.14	IGFL3	IGFL3	-0.0127988	0.00251485	5.00505829210804e-07	1.53735049018398e-06	0.0017843	Significant
X18893.26	GPR56	ADGRG1	0.0754603	0.010899	1.23204687921573e-11	7.81538634235601e-11	4.39224712440408e-08	Significant
X7182.1	carboxylesterase, liver	CES1	-0.00474383	0.0017044	0.00558054	0.00875259	1	Significant
X8969.49	CD14	CD14	0.0189509	0.00463953	5.07571814063067e-05	0.00011074	0.180949	Significant
X2982.82	Galectin-4	LGALS4	-0.0110358	0.00220873	7.91694050501728e-07	2.33062699425158e-06	0.00282239	Significant
X21122.3	DBND2	DBNDD2	0.0128572	0.00250707	4.08735399395382e-07	1.27931668028493e-06	0.00145714	Significant
X9061.3	ARHGA	ARHGEF10	0.0137612	0.00258347	1.48782590189832e-07	5.03692611625959e-07	0.00053041	Significant
X13940.19	IP16:HIN 1	IFI16	-0.00719135	0.00329605	0.0295742	0.0412973	1	Significant
X4557.61	KIRR3	KIRREL3	0.0445028	0.00721354	1.33650201223685e-09	6.41269135077304e-09	4.76462967362437e-06	Significant
X2969.11	ALK-1	ACVRL1	-0.012989	0.00266413	1.42499807205793e-06	4.02864244796711e-06	0.00508012	Significant
X12350.86	ETS2	ETS2	0.011706	0.00217566	1.10881345867556e-07	3.8303488180023e-07	0.000395292	Significant
X8060.7	NRG2	NRG2	0.0209634	0.00715829	0.00355111	0.00575965	1	Significant
X12022.12	SMAD4	SMAD4	0.0205234	0.00290549	4.98130671178852e-12	3.31931933224786e-11	1.77583584275261e-08	Significant
X5460.60	DEAD-box protein 19B	DDX19B	-0.00593201	0.00180866	0.00110519	0.00195437	1	Significant
X13427.66	MA1C1	MAN1C1	0.0398943	0.0102324	0.000108803	0.000223306	0.387882	Significant
X2634.2	IL-2 sRg	IL2RG	-0.00627156	0.00227827	0.00610972	0.00953223	1	Significant
X25091.83	FNBP2	SRGAP2	0.0251498	0.00337858	3.89355342329454e-13	2.92837931519937e-12	1.3880517954045e-09	Significant
X2794.60	SOD	SOD1	0.007494	0.00268169	0.0053873	0.00847187	1	Significant
X12030.82	Desmin	DES	-0.00993229	0.00324922	0.00234874	0.00394949	1	Significant
X18301.10	NAIF1	NAIF1	0.0651351	0.00956588	2.61411570605374e-11	1.60677974001407e-10	9.31932249208158e-08	Significant
X12804.5	GMEB2	GMEB2	-0.00669386	0.00254723	0.00883219	0.0134329	1	Significant
X11294.7	TMCC3:region 2	TMCC3	-0.0106589	0.0021309	7.65771121636678e-07	2.25991229191619e-06	0.00272997	Significant
X16809.1	NDKM	NME4	-0.0113884	0.00245627	4.47038865424232e-06	1.14571786861063e-05	0.0159369	Significant
X25242.12	CATIP	CATIP	-0.00558806	0.00143534	0.000111291	0.000228149	0.396751	Significant
X15323.112	AGO3	AGO3	0.00874664	0.00355123	0.0140905	0.0207316	1	Significant
X8446.4	PACAP-27	ADCYAP1	0.0088852	0.00408304	0.029987	0.0417429	1	Significant
X5440.26	Troponin I, skeletal, fast twitch	TNNI2	-0.0128955	0.00321785	7.09112664438256e-05	0.000149851	0.252799	Significant
X9022.49	DB132	DEFB132	-0.00629219	0.0028994	0.0304261	0.0422575	1	Significant
X12632.14	ARY1	NAT1	0.013149	0.00442575	0.00309976	0.00508076	1	Significant
X7215.18	NADH-cytochrome b5 reductase	CYB5R3	-0.0131468	0.00233834	3.04351546241552e-08	1.17425677743629e-07	0.000108501	Significant
X4232.19	IGF-I sR	IGF1R	0.0514787	0.00826702	9.4927818225798e-10	4.66782995827545e-09	3.3841767197497e-06	Significant
X7810.20	C1QTNF5	C1QTNF5	0.0140968	0.00507824	0.00569767	0.00892843	1	Significant
X6914.15	AMGO2	AMIGO2	0.0321206	0.00499295	2.73387406553053e-10	1.47927391766193e-09	9.74626104361634e-07	Significant
X6409.57	GP116	ADGRF5	0.0102978	0.00332042	0.00203061	0.00344228	1	Significant
X13112.179	FSTL1	FSTL1	0.0105685	0.00295348	0.000377395	0.000708926	1	Significant
X6899.37	PHS2	PCBD2	-0.0126187	0.00265744	2.64792936669215e-06	7.07636296271178e-06	0.00943987	Significant
X7917.17	CBPD	CPD	0.0256243	0.00398859	2.90028256576038e-10	1.55493470901938e-09	1.03395073469358e-06	Significant
X23547.21	TCEA3	TCEA3	-0.00864693	0.00298921	0.00398091	0.00640141	1	Significant
X5076.53	EPHAA	EPHA10	0.0621396	0.0109649	2.3532318783244e-08	9.28016775025054e-08	8.38927164622649e-05	Significant
X6423.66	C1QL2	C1QL2	0.0745987	0.0117046	3.92861649856925e-10	2.05963497314697e-09	1.40055178173994e-06	Significant
X10527.22	DHX9	DHX9	-0.00572516	0.0027993	0.0413161	0.0559195	1	Significant
X18232.42	PI42B	PIP4K2B	-0.0085671	0.0030928	0.00582269	0.00910434	1	Significant
X19448.104	UPP1	UPP1	-0.0088718	0.00261085	0.000729319	0.00131981	1	Significant
X14332.3	RALA	RALA	0.0253031	0.00468121	9.72750165820046e-08	3.39985719720438e-07	0.000346785	Significant
X10624.45	ISK13	SPINK13	0.0109688	0.00200697	7.05115758567155e-08	2.51625393322513e-07	0.000251374	Significant
X13477.65	LT4R1	LTB4R	0.0159881	0.0039196	5.22384558522689e-05	0.000113624	0.18623	Significant
X13392.13	AT1B1	ATP1B1	0.0271589	0.0043279	7.16567942617628e-10	3.60305319524943e-09	2.55456471543184e-06	Significant
X9952.57	TFAM	TFAM	-0.014941	0.00394181	0.000167793	0.000333993	0.598182	Significant
X20970.14	DBND1	DBNDD1	0.00968241	0.00174316	4.44808914576097e-08	1.66046469158512e-07	0.000158574	Significant
X21976.4	IKK-gamma	IKBKG	-0.0122501	0.00235247	2.72647812014759e-07	8.82189622894982e-07	0.000971989	Significant
X9233.71	TFPI -2	TFPI2	0.0476063	0.0100123	2.54925416752529e-06	6.85893668470012e-06	0.00908809	Significant
X24942.22	UN13D	UNC13D	-0.0107551	0.00224015	2.0492491695491e-06	5.61982837635375e-06	0.00730557	Significant
X6909.40	MGAT2	MGAT2	0.0821328	0.0136157	3.01654783551752e-09	1.36471992812436e-08	1.075399303362e-05	Significant
X12738.43	NISCH	NISCH	0.00573579	0.00151248	0.000166769	0.000332141	0.594533	Significant
X19236.24	TCP4	SUB1	-0.0175115	0.00538488	0.00121888	0.00213843	1	Significant
X19294.26	CRIPT	CRIPT	-0.0122469	0.002057	4.68275090874679e-09	2.06353609266778e-08	1.66940069896823e-05	Significant
X21979.8	Integrin a6	ITGA6	0.00288908	0.00118651	0.0152265	0.0222742	1	Significant
X8660.33	OLFL3	OLFML3	0.0165903	0.00812274	0.0415888	0.0562459	1	Significant
X6447.73	PTX3	PTX3	-0.00861954	0.00206367	3.44329041126032e-05	7.70096004776853e-05	0.122753	Significant
X6998.106	HAAH	ASPH	0.0400685	0.00596642	4.73121973256568e-11	2.82999972258333e-10	1.68667983465966e-07	Significant
X2987.37	Histone H1.2	H1-2	-0.0192052	0.00295875	1.92830836922992e-10	1.07245231455611e-09	6.87441933630466e-07	Significant
X23008.4	RAB2A	RAB2A	-0.0108076	0.00364168	0.00313575	0.00513031	1	Significant
X6574.11	FAIM3	FCMR	0.0315501	0.0087443	0.000337084	0.000637848	1	Significant
X17172.19	STAT	STATH	0.012531	0.00443765	0.00492442	0.007799	1	Significant
X21722.21	GALT4	GALNT4	0.0337554	0.00805349	3.23182492478815e-05	7.26447405855596e-05	0.115215	Significant
X21219.7	RPAIN	RPAIN	0.00260913	0.000933163	0.00535533	0.00842902	1	Significant
X21382.70	RNZ1	ELAC1	-0.00939972	0.00370094	0.0113896	0.0169891	1	Significant
X18207.6	CHM1B	CHMP1B	-0.00972182	0.00222682	1.52947482929537e-05	3.61337161460437e-05	0.0545258	Significant
X6117.4	NEC2	PCSK2	0.0229073	0.00318082	2.15161238612116e-12	1.47545520611768e-11	7.67049815652193e-09	Significant
X19202.10	BTK	BTK	-0.0130954	0.002201	4.80229782134259e-09	2.10321765762731e-08	1.71201917330863e-05	Significant
X10569.28	MFAP2	MFAP2	0.0168048	0.00707337	0.0178561	0.025772	1	Significant
X17161.1	OST48	DDOST	0.0606421	0.0089591	3.37081822224659e-11	2.03677406140832e-10	1.20169669623091e-07	Significant
X20110.25	HN1L	JPT2	-0.00968127	0.00233124	3.8161957361791e-05	8.49234569255836e-05	0.136047	Significant
X2855.49	ERK-1	MAPK3	0.0371576	0.00726908	4.54034133410828e-07	1.4087307968752e-06	0.00161863	Significant
X3809.1	FGFR-3:CD	FGFR3	-0.0113463	0.0024219	3.5388649535849e-06	9.24253008024188e-06	0.0126161	Significant
X19743.12	VSTM1	VSTM1	-0.0108603	0.00278226	0.000107112	0.000220215	0.381853	Significant
X6458.6	RPN1:LD	RPN1	0.0561243	0.0156054	0.000353397	0.000667299	1	Significant
X22504.3	N42L2	N4BP2L2	0.0314147	0.00639119	1.17219158325308e-06	3.35651646128292e-06	0.00417886	Significant
X19369.17	GCNL2	KAT2A	0.0187735	0.00309492	2.48913804720608e-09	1.1479659946041e-08	8.87377713828968e-06	Significant
X11377.19	ADH7	ADH7	-0.0028484	0.000962317	0.00321332	0.00524278	1	Significant
X12415.122	EDF1	EDF1	-0.0119458	0.00228712	2.51157098637545e-07	8.18204574412579e-07	0.000895375	Significant
X8877.22	F176C:ECD	EVA1C	0.0128554	0.00255798	6.86892216511363e-07	2.0508967771047e-06	0.00244877	Significant
X4160.49	MMP-2	MMP2	-0.0118676	0.00594047	0.0462673	0.0621488	1	Significant
X7859.21	PCDGK	PCDHGC3	0.0324735	0.00792667	4.83444066755015e-05	0.0001058	0.172348	Significant
X15619.49	MOG	MOG	0.00787366	0.0019741	7.56978651479316e-05	0.00015865	0.269863	Significant
X17396.23	ADH1A	ADH1A	-0.0130688	0.00266079	1.20211620765968e-06	3.43392971178426e-06	0.00428554	Significant
X12657.2	FCL	TSTA3	0.0125026	0.00210908	5.5542416554741e-09	2.4001056365776e-08	1.98008715017652e-05	Significant
X13377.3	C56D1	CYB561D1	-0.0151998	0.00235559	2.4893314205074e-10	1.3569520663775e-09	8.87446651410888e-07	Significant
X8924.55	CALY	CALY	0.0534692	0.0137094	0.000108052	0.000221893	0.385206	Significant
X21167.33	PTPM1	PTPMT1	-0.011571	0.00228013	5.34087288377514e-07	1.62669669838353e-06	0.00190402	Significant
X5609.92	F19A5	TAFA5	0.037392	0.00692254	9.85212633063756e-08	3.44004215168687e-07	0.000351228	Significant
X21696.80	LRFN4	LRFN4	0.0555182	0.0079648	9.09618337513095e-12	5.85341042100033e-11	3.24278937323418e-08	Significant
X21436.56	ATG4A	ATG4A	-0.00654899	0.00227815	0.00420795	0.00672405	1	Significant
X2649.77	sICAM-3	ICAM3	-0.00913768	0.00223948	5.17878586402445e-05	0.000112794	0.184624	Significant
X18285.6	SVIP	SVIP	0.0356567	0.00599088	4.78468159806153e-09	2.10321765762731e-08	1.70573898970894e-05	Significant
X9970.7	UBXN4:CD 2	UBXN4	0.00717051	0.00279651	0.0106119	0.0159223	1	Significant
X3182.38	CD39	ENTPD1	0.032417	0.00629629	3.67799533319547e-07	1.16551585447483e-06	0.00131121	Significant
X5699.19	CI061	FAM189A2	0.0702629	0.00956043	7.42946276923389e-13	5.3615455004694e-12	2.64860347723188e-09	Significant
X8992.1	TMEM2	CEMIP2	0.00734785	0.00238173	0.00213913	0.00361422	1	Significant
X19334.62	TXD12	TXNDC12	0.0325908	0.00571136	1.89506729399641e-08	7.57389563127489e-08	6.7559149030972e-05	Significant
X10053.5	ILK1	ILK	-0.00888597	0.00223964	8.24427791602405e-05	0.000171977	0.293909	Significant
X6558.5	COL10	COLEC10	-0.00357949	0.00159286	0.0250284	0.0353092	1	Significant
X14684.17	CAN2	CAPN2	0.0269146	0.0052741	4.61786431388268e-07	1.43153793730363e-06	0.00164627	Significant
X2829.19	IL-27	IL27|EBI3	-0.0119107	0.002166	5.89828656922342e-08	2.13476057048543e-07	0.000210274	Significant
X25102.23	ELP1	ELP1	-0.0102349	0.0021654	2.92645311663313e-06	7.75096980742727e-06	0.0104328	Significant
X21768.9	MGT5A	MGAT5	0.0729579	0.0123644	6.4759511098246e-09	2.76488212054188e-08	2.30867657065247e-05	Significant
X2436.49	CXCL16, soluble	CXCL16	0.0446023	0.0075517	6.15194847994686e-09	2.63602119363108e-08	2.19316963310106e-05	Significant
X12483.62	RORB	RORB	-0.0112967	0.00216976	2.73427199639866e-07	8.83742490223139e-07	0.000974768	Significant
X15402.2	ID-1	ID1	0.00509341	0.00159487	0.00148696	0.00257331	1	Significant
X3864.5	RS7	RPS7	-0.0132681	0.00264312	7.01334560646766e-07	2.08877001562717e-06	0.00250026	Significant
X5134.52	TIMD3	HAVCR2	0.0523794	0.00881474	5.01827950408716e-09	2.18973885337463e-08	1.78901664320707e-05	Significant
X18297.8	RASM	MRAS	-0.010699	0.00209736	4.67304851902297e-07	1.44487579968056e-06	0.00166594	Significant
X9854.36	Aldose reductase	AKR1B1	0.0721737	0.00756651	5.01692979509571e-20	5.90275733317367e-19	1.78853547195162e-16	Significant
X3332.57	RGM-C	HJV	0.0993805	0.0160231	1.10731461739109e-09	5.37816976975373e-09	3.94757661099924e-06	Significant
X20373.141	GID8	GID8	-0.00574625	0.00184052	0.00189648	0.00323645	1	Significant
X15506.34	LRP12	LRP12	0.0263957	0.00440122	3.68646920284528e-09	1.64278283851793e-08	1.31422627081434e-05	Significant
X10753.31	ADAM7	ADAM7	-0.00657181	0.00245965	0.00777264	0.0119129	1	Significant
X11254.13	PPN	PAPLN	0.0038213	0.000975539	0.000101023	0.000208418	0.360147	Significant
X7871.16	T132A	TMEM132A	0.042271	0.0066224	3.69723374289168e-10	1.96140450794774e-09	1.31806382934088e-06	Significant
X24898.39	SCFD1	SCFD1	0.00733387	0.00172477	2.50717242601107e-05	5.722195709814e-05	0.0893807	Significant
X13518.5	ASAP2	ASAP2	0.0237135	0.00545414	1.65045420958253e-05	3.87351498167329e-05	0.0588387	Significant
X13236.25	WNT3A	WNT3A	0.00622586	0.00235707	0.00850561	0.0129528	1	Significant
X23278.13	39S ribosomal protein L12	MRPL12	0.0114385	0.00268299	2.3785874711405e-05	5.44965574204106e-05	0.0847966	Significant
X3469.74	RPS6KA3	RPS6KA3	-0.00594572	0.00242664	0.0145957	0.0214043	1	Significant
X6455.52	HPLN4	HAPLN4	0.0525429	0.00824639	3.99950313372217e-10	2.09064936535477e-09	1.42582286717195e-06	Significant
X22005.8	PDP1	PDP1	-0.00678347	0.00177536	0.00014873	0.000298879	0.530221	Significant
X16919.1	ACBP	DBI	0.0164124	0.00485832	0.000781258	0.00140737	1	Significant
X6384.19	WFDC3	WFDC3	-0.0139758	0.00266131	2.17674850531382e-07	7.19296531527391e-07	0.000776011	Significant
X11955.1	RHG01:Rho-GAP	ARHGAP1	0.0441866	0.00602557	8.25463426325521e-13	5.90919099367567e-12	2.94277711485048e-09	Significant
X8851.42	F171B:ECD	FAM171B	0.0705065	0.0137978	4.47227252988287e-07	1.39124359241121e-06	0.00159437	Significant
X22144.65	FBX48	FBXO48	0.00423152	0.00196068	0.0313634	0.0434047	1	Significant
X19168.71	PPIP1	PSTPIP1	-0.0207405	0.00434249	2.31787585432072e-06	6.27904819198584e-06	0.00826323	Significant
X4318.12	PTP-1C	PTPN6	-0.00787837	0.00197124	7.30693917310121e-05	0.000153502	0.260492	Significant
X13658.31	PDGF-CC	PDGFC	0.0440095	0.00867503	5.36584877819457e-07	1.63218864285526e-06	0.00191293	Significant
X3891.56	MBD4	MBD4	-0.0120122	0.00235731	4.80272796402909e-07	1.47983795953014e-06	0.00171217	Significant
X7066.199	F209B	FAM209B	0.00873892	0.0018633	3.46055439495387e-06	9.07790759235507e-06	0.0123369	Significant
X18830.1	Omentin	ITLN1	-0.00838059	0.00227066	0.000246096	0.00047733	0.877333	Significant
X15315.64	CUTC	CUTC	-0.0110932	0.00236141	3.33487712478312e-06	8.75466638427969e-06	0.0118888	Significant
X12931.16	MCR	NR3C2	0.0437538	0.00816577	1.24574571876661e-07	4.26617049702494e-07	0.000444108	Significant
X18897.31	HDAC2	HDAC2	-0.018768	0.00512069	0.000272913	0.000524493	0.972934	Significant
X4337.49	CRP	CRP	-0.168647	0.0351722	2.10008721879649e-06	5.75023881337134e-06	0.00748681	Significant
X15386.7	FABPA	FABP4	-0.0385227	0.0130419	0.00327728	0.00533493	1	Significant
X13423.94	CJ058	PRXL2A	0.0110488	0.00179651	1.55444681397516e-09	7.38880385576193e-09	5.54160289182144e-06	Significant
X23176.17	Beta-dystroglycan	DAG1	0.0397542	0.00776044	4.1796362115553e-07	1.30705290299953e-06	0.00149004	Significant
X25948.18	PKN2	PKN2	0.0244135	0.00500674	1.43369802727019e-06	4.05002651919035e-06	0.00511113	Significant
X20243.26	Profilin-1	PFN1	0.0510169	0.0073042	8.30810875242483e-12	5.36565356927437e-11	2.96184077023945e-08	Significant
X14125.5	ApoM	APOM	-0.0211032	0.00696069	0.00254897	0.00426223	1	Significant
X22978.13	HMG-2	HMGB2	-0.0136972	0.00234583	9.03984646466286e-09	3.78251791625858e-08	3.22270526465231e-05	Significant
X12786.61	GDE5	GPCPD1	0.0119204	0.00315745	0.000178037	0.000352809	0.634703	Significant
X13669.6	FGFR-3:ECD	FGFR3	0.0529701	0.0095473	4.49527377455494e-08	1.67632332701761e-07	0.000160257	Significant
X6263.77	PLTP	PLTP	-0.00967397	0.00321264	0.00272425	0.00451929	1	Significant
X14120.2	RNF43	RNF43	-0.0124253	0.00238538	2.72699288760244e-07	8.82189622894982e-07	0.000972173	Significant
X23675.16	CEP76	CEP76	-0.00998294	0.00192879	3.23537161073089e-07	1.03352148676126e-06	0.00115341	Significant
X6895.1	TR:CD	TFRC	-0.0127228	0.00244234	2.72098680530541e-07	8.81847087355799e-07	0.000970032	Significant
X8289.8	GPNMB:ECD	GPNMB	0.0585111	0.00918402	3.97842144428604e-10	2.08268317898381e-09	1.41830724488797e-06	Significant
X12518.289	PB1	PBRM1	-0.0117994	0.0023723	8.81655542091144e-07	2.5742031183906e-06	0.0031431	Significant
X9851.9	FABPA	FABP4	-0.0304817	0.0133213	0.02252	0.0319984	1	Significant
X6965.19	CNTP2	CNTNAP2	0.0520754	0.0080362	2.03855226742977e-10	1.12673470285072e-09	7.26743883338713e-07	Significant
X18323.39	DRP-1	CRMP1	0.00821022	0.00150973	8.11818422315448e-08	2.86508446736785e-07	0.000289413	Significant
X16915.153	SEM4A	SEMA4A	0.0491702	0.00893088	5.67249128933491e-08	2.06984968745946e-07	0.000202224	Significant
X14662.6	MZF1	MZF1	-0.0124457	0.00322327	0.000126523	0.000257451	0.451054	Significant
X7744.10	LRP12	LRP12	0.0481693	0.00769546	7.82105707672821e-10	3.9050516076381e-09	2.78820684785361e-06	Significant
X13657.2	PNKP	PNKP	-0.0104664	0.00241618	1.76482383943073e-05	4.11753729553047e-05	0.062916	Significant
X18883.4	DEST	DSTN	0.00973861	0.00383636	0.0114273	0.0170383	1	Significant
X15495.9	FOLR3	FOLR3	0.0128987	0.00302527	2.38336925601749e-05	5.45604778921613e-05	0.0849671	Significant
X20165.4	DPYS	DPYS	-0.0103113	0.00346168	0.00302461	0.00497819	1	Significant
X11402.17	KMT2C	KMT2C	-0.00478566	0.00201922	0.0181398	0.0261391	1	Significant
X6069.71	SUMF2	SUMF2	0.0398139	0.00498966	9.06930913133334e-15	7.86668784749473e-14	3.23320870532034e-11	Significant
X21189.9	NUBP1	NUBP1	0.0416489	0.00992324	3.16098035875405e-05	7.10971292047835e-05	0.112689	Significant
X4995.16	HPG-	HPGD	0.00910383	0.00292689	0.00196618	0.00333942	1	Significant
X8891.7	CPVL	CPVL	0.00879116	0.00291688	0.00270123	0.00448736	1	Significant
X17405.2	UCHL5	UCHL5	-0.00702324	0.00199402	0.000464291	0.000862531	1	Significant
X11129.66	BMP15	BMP15	-0.00754642	0.00292709	0.010212	0.0153741	1	Significant
X21687.3	PPR29	ELFN2	0.0672797	0.0109266	1.43719221255506e-09	6.86808342863108e-09	5.12359023775879e-06	Significant
X6531.29	F162A	FAM162A	0.00211161	0.000923383	0.0225896	0.0320844	1	Significant
X23623.48	NUD11	NUDT11	-0.00486048	0.00227898	0.0334079	0.046002	1	Significant
X11179.7	TSSK1	TSSK1B	0.00976079	0.00267562	0.000289819	0.000554593	1	Significant
X5703.26	NOE1	OLFM1	0.0921299	0.013504	2.36409913099915e-11	1.46180534358817e-10	8.42801340201197e-08	Significant
X20374.41	COQ9	COQ9	-0.0123083	0.00437274	0.00506454	0.0079996	1	Significant
X12784.10	APBB3:PID 1	APBB3	-0.0064395	0.00183139	0.0004749	0.00088178	1	Significant
X8424.269	b-Catenin	CTNNB1	-0.00740381	0.00230836	0.00141909	0.00246422	1	Significant
X3400.49	TBK1	TBK1	-0.0113215	0.00249878	7.24151255095617e-06	1.80279275448036e-05	0.025816	Significant
X11270.17	CHC10	CHCHD10	0.0109372	0.00411573	0.00810855	0.0123799	1	Significant
X6544.33	NELL1	NELL1	0.0428691	0.00671658	3.79362808158464e-10	2.00008588037288e-09	1.35242841108492e-06	Significant
X10073.22	TYDP1	TDP1	-0.012972	0.00261939	9.80217958560028e-07	2.84103822948496e-06	0.00349448	Significant
X5356.2	MIF	MIF	0.0297444	0.00445456	6.06751795014495e-11	3.58718101032616e-10	2.16307014922667e-07	Significant
X4545.53	DnaJ homolog	DNAJC19	-0.013622	0.00238032	1.73589173759432e-08	6.98471111120062e-08	6.18845404452375e-05	Significant
X15614.168	LIRA2	LILRA2	0.0577567	0.00898437	2.82363794056859e-10	1.52288491045795e-09	1.0066269258127e-06	Significant
X13076.4	FXR1	FXR1	-0.00848844	0.00230394	0.000252652	0.00048872	0.900704	Significant
X12867.40	DYLT3	DYNLT3	-0.0142878	0.00342941	3.79657696787001e-05	8.45396432882985e-05	0.135348	Significant
X15446.25	SMDF	NRG1	0.0104098	0.00389826	0.00780428	0.0119563	1	Significant
X21658.15	PHB2	PHB2	-0.00559402	0.00196054	0.00449265	0.00714695	1	Significant
X15413.3	LCAT	LCAT	-0.0139031	0.00565144	0.0142263	0.0209227	1	Significant
X23359.25	FL2D	WTAP	0.0513348	0.00937358	6.63080577028171e-08	2.37815116408997e-07	0.000236388	Significant
X18306.1	PALM	PALM	0.0124721	0.00232309	1.18784753408462e-07	4.0914748396248e-07	0.000423468	Significant
X6387.61	HD-5	DEFA5	-0.00979426	0.00231027	2.63274478618572e-05	5.98962039741678e-05	0.0938574	Significant
X21280.13	T22D3	TSC22D3	-0.00848367	0.00177843	2.37027099765824e-06	6.39668138277943e-06	0.00845002	Significant
X15431.31	OTCase	OTC	-0.0176698	0.00516547	0.000673305	0.00122403	1	Significant
X25938.13	NGN3	NEUROG3	0.00415141	0.00200976	0.0393521	0.0534728	1	Significant
X24645.2	BIN3	BIN3	0.0068192	0.00209751	0.00122039	0.00214004	1	Significant
X3739.72	gpIIbIIIa	ITGA2B|ITGB3	-0.0117662	0.00304665	0.000127118	0.000258515	0.453177	Significant
X11177.16	K2C5	KRT5	-0.0114309	0.00220378	3.03575456216855e-07	9.72368824270519e-07	0.00108225	Significant
X6590.54	Neuropilin-2	NRP2	0.0384853	0.00713211	1.01680054555977e-07	3.53303503403565e-07	0.000362489	Significant
X14705.1	VEGF-D	VEGFD	0.0244176	0.00478488	4.6699960027699e-07	1.44487579968056e-06	0.00166485	Significant
X21862.145	LASP-1	LASP1	0.0433815	0.00855767	5.51655566643832e-07	1.67374646390235e-06	0.00196665	Significant
X21746.13	UBP10	USP10	0.00347939	0.000929736	0.000201806	0.000395711	0.719439	Significant
X9598.23	CSMD1	CSMD1	0.00846502	0.00178242	2.62905155875849e-06	7.04174966714802e-06	0.00937257	Significant
X21106.206	CETN1	CETN1	-0.00638182	0.00194911	0.00112769	0.00198824	1	Significant
X25073.13	UBE4A	UBE4A	-0.0183473	0.00339283	9.67435596776649e-08	3.38460049313911e-07	0.000344891	Significant
X7142.5	CBPN	CPN1	-0.0124247	0.00258297	1.95728249674256e-06	5.39235865601795e-06	0.00697771	Significant
X21385.5	SLIK2	SLITRK2	0.0671883	0.0149437	8.46949522249656e-06	2.09678822695835e-05	0.0301938	Significant
X17337.1	TYY1	YY1	-0.0132447	0.00346554	0.000148434	0.000298796	0.529167	Significant
X15525.294	ADH1G	ADH1C	0.00694522	0.00306644	0.0239171	0.0338889	1	Significant
X12888.18	SAP30	SAP30	-0.0103499	0.00320302	0.0013068	0.00228257	1	Significant
X2704.74	TACI	TNFRSF13B	-0.0098685	0.00222954	1.16025544717745e-05	2.80618091532402e-05	0.0413631	Significant
X13618.15	MD1L1	MAD1L1	-0.0103268	0.00186457	4.76447118530707e-08	1.76746511713004e-07	0.000169853	Significant
X20542.47	CALCR	CALCR	-0.00650756	0.00180174	0.000332593	0.000629683	1	Significant
X2746.56	TSLP R	CRLF2	-0.0138374	0.00200808	1.53409846504662e-11	9.66265199274064e-11	5.4690610278912e-08	Significant
X19117.3	PP14A	PPP1R14A	0.00575461	0.00254389	0.0240896	0.0340926	1	Significant
X23298.148	THEM4	THEM4	-0.00950798	0.0021422	1.09719989079646e-05	2.66815662393546e-05	0.0391152	Significant
X10643.16	NOE3:C-term	OLFM3	-0.0116425	0.00236538	1.14003897871384e-06	3.26970149566761e-06	0.00406424	Significant
X8768.4	Bcl-10	BCL10	-0.00967971	0.00197311	1.23217581788076e-06	3.51416543259593e-06	0.00439271	Significant
X4560.34	LCK	LCK	-0.0111125	0.00234622	2.78257970626941e-06	7.39187530018662e-06	0.0099199	Significant
X3202.28	KREM2	KREMEN2	-0.0137956	0.00237951	1.14925930165123e-08	4.73654267096721e-08	4.09710941038664e-05	Significant
X20541.73	CD1B	CD1B	-0.0125566	0.00221579	2.36024840026613e-08	9.28631248615778e-08	8.41428554694875e-05	Significant
X11572.4	DYN2	DNM2	0.0307503	0.00442408	1.04631454255162e-11	6.69678876875498e-11	3.73011134419653e-08	Significant
X3666.17	complement factor H-related 5	CFHR5	-0.00853842	0.00409973	0.0377515	0.0514859	1	Significant
X22499.15	MED28	MED28	-0.0100606	0.00296682	0.00074772	0.00135105	1	Significant
X23408.1	Sorting nexin 16	SNX16	0.00980555	0.00212868	5.11355349286788e-06	1.29842009986282e-05	0.0182298	Significant
X19361.78	MATN3	MATN3	0.0622304	0.0112517	4.9742721549649e-08	1.84337632353949e-07	0.000177333	Significant
X13126.52	DSC2	DSC2	0.0281633	0.00564318	8.11124304916529e-07	2.3819259860193e-06	0.00289166	Significant
X18866.8	CANB2	PPP3R2	-0.00822988	0.00209514	9.67524295639491e-05	0.000199955	0.344922	Significant
X20953.34	MMAC	MMACHC	-0.00727609	0.0027448	0.00827633	0.0126252	1	Significant
X8330.1	LRP11	LRP11	0.0481937	0.010971	1.34490778478525e-05	3.21784983406672e-05	0.047946	Significant
X11121.56	VWC2	VWC2	0.0416022	0.00906067	5.458491288256e-06	1.38206828427789e-05	0.0194595	Significant
X9038.12	JTB	JTB	0.0408283	0.00666198	1.70175798726286e-09	8.03545327760542e-09	6.0667672245921e-06	Significant
X10370.21	STAT1	STAT1	-0.0121428	0.00254717	2.41143072261799e-06	6.50283700917786e-06	0.00859675	Significant
X19808.26	RAB3D	RAB3D	-0.0108323	0.00268343	6.23033220557113e-05	0.000133561	0.222111	Significant
X9384.17	Cathelicidin peptide	CAMP	-0.0149895	0.0025567	7.92965372625081e-09	3.34943312015215e-08	2.82692155340841e-05	Significant
X12817.1	GEM	GEM	-0.00901766	0.00182141	9.91631838855106e-07	2.86945414408965e-06	0.00353517	Significant
X2605.49	CD30	TNFRSF8	0.0105691	0.00524369	0.0443366	0.0596677	1	Significant
X3234.23	URB	CCDC80	0.0394238	0.00817818	1.85796934155689e-06	5.13860411377061e-06	0.00662366	Significant
X13723.6	IL-10	IL10	-0.00613909	0.00239349	0.0105889	0.0159012	1	Significant
X6283.60	MCEM1	MCEMP1	-0.010849	0.00209694	3.24596714376872e-07	1.0359778753389e-06	0.00115719	Significant
X2849.49	AIF1	AIF1	0.0335519	0.00797727	3.04206862789395e-05	6.85956651387851e-05	0.10845	Significant
X16320.139	CD320	CD320	0.0494101	0.0072195	2.07567124030922e-11	1.29593134355558e-10	7.39976797170237e-08	Significant
X15426.5	NEUR1	NEU1	-0.0201312	0.00852625	0.0185694	0.0267259	1	Significant
X18273.14	GGE2D	GAGE2D	0.00229732	0.000958334	0.0168628	0.0244672	1	Significant
X7049.2	ADAM 23	ADAM23	0.0576412	0.00970797	5.14555560476224e-09	2.23706167450944e-08	1.83439057309774e-05	Significant
X21286.29	RL11	RPL11	-0.0070102	0.00219966	0.00152197	0.00262752	1	Significant
X5687.5	GLU2B	PRKCSH	0.0472486	0.00734919	2.8030398525388e-10	1.51406622337891e-09	9.99283707430082e-07	Significant
X7806.33	B4GT7	B4GALT7	0.034936	0.0069832	7.75815143822344e-07	2.28749568080061e-06	0.00276578	Significant
X18321.38	MTDC	MTHFD2	-0.00942455	0.00285986	0.00104664	0.00185728	1	Significant
X11458.30	PCBP1	PCBP1	0.0405786	0.00902837	8.63831526945316e-06	2.13118297132183e-05	0.0307956	Significant
X4568.17	SLIK5	SLITRK5	0.0705436	0.0108235	1.62392283183947e-10	9.10264920677313e-10	5.78928489550771e-07	Significant
X17436.193	CSNK1G2	CSNK1G2	-0.0133797	0.00253089	1.81729594287567e-07	6.08587286066364e-07	0.000647866	Significant
X4144.13	MCP-4	CCL13	-0.0105032	0.00234739	9.33890477893715e-06	2.29291980281756e-05	0.0332932	Significant
X9261.14	EphB6	EPHB6	0.0871302	0.0127053	1.89569370183694e-11	1.18564000825416e-10	6.75814804704869e-08	Significant
X17383.4	STAR5	STARD5	-0.0122126	0.00228783	1.38549094311878e-07	4.71304886662066e-07	0.000493928	Significant
X2505.49	GFRa-3	GFRA3	-0.0112833	0.00213561	1.83642026493818e-07	6.14149929128012e-07	0.000654684	Significant
X21306.7	HAUS1	HAUS1	-0.00356374	0.00126501	0.00502306	0.00794112	1	Significant
X7211.2	RNase 1	RNASE1	0.0965968	0.0163411	5.97251800891565e-09	2.56530442190172e-08	2.12920267017843e-05	Significant
X23783.22	F110A	FAM110A	-0.0108559	0.0026961	6.47791095103452e-05	0.000138121	0.230938	Significant
X19638.9	Dynorphin A (1-17)	PDYN	-0.0196237	0.00771349	0.0112308	0.0167732	1	Significant
X7832.181	Protein disulfide isomerase A3	PDIA3	0.0328729	0.00552565	4.79895839734298e-09	2.10321765762731e-08	1.71082866865277e-05	Significant
X2524.56	HMG-1	HMGB1	-0.0133593	0.00230424	1.14361001116133e-08	4.71871491873859e-08	4.07696968979014e-05	Significant
X15641.20	TEFF1	TMEFF1	0.050761	0.00768473	9.37978653951628e-11	5.40209030910752e-10	3.34389390133755e-07	Significant
X8225.86	EPHB2	EPHB2	0.0430536	0.00767456	3.2184496381153e-08	1.23906835419882e-07	0.000114738	Significant
X21823.5	PPM1G	PPM1G	0.0343536	0.00446202	6.46941576107105e-14	5.20620026822083e-13	2.30634671882183e-10	Significant
X5707.55	ELK3	ELK3	-0.0174098	0.00361196	1.87373721090114e-06	5.1741852493126e-06	0.00667987	Significant
X8045.3	KI3L3:CD	KIR3DL3	0.0364341	0.00810505	8.50620516455612e-06	2.1029557150931e-05	0.0303246	Significant
X9470.15	MET24	METTL24	0.0421462	0.00771057	7.00420796639263e-08	2.5020041483156e-07	0.0002497	Significant
X14064.21	PGRP-S	PGLYRP1	0.00304284	0.00118581	0.0105523	0.0158529	1	Significant
X7776.20	UNC5B	UNC5B	0.0474344	0.0071487	7.76317813173561e-11	4.52217811105187e-10	2.76757300396374e-07	Significant
X5245.40	AMPK a2b2g1	PRKAA2|PRKAB2|PRKAG1	-0.00839369	0.0026332	0.00151872	0.00262317	1	Significant
X16758.96	HDGF	HDGF	-0.0092088	0.00344203	0.00770824	0.0118193	1	Significant
X8244.16	FUT8	FUT8	0.0574301	0.0117638	1.38262905387047e-06	3.91506956080081e-06	0.00492907	Significant
X4909.68	Galectin-8	LGALS8	0.00651618	0.00160765	5.80008793233223e-05	0.00012509	0.206773	Significant
X5066.134	CLM6	CD300C	0.0507397	0.00886737	1.73808467043869e-08	6.98565033834716e-08	6.19627185011393e-05	Significant
X11405.150	CARD9	CARD9	-0.0118577	0.00225811	2.17294645028347e-07	7.19271503738214e-07	0.000774655	Significant
X3312.64	FCGR1	FCGR1A	0.030899	0.00744722	3.87641564040648e-05	8.61023162495271e-05	0.138194	Significant
X20385.21	CPTP	CPTP	0.00823029	0.0017198	2.21175581207945e-06	6.01901486264369e-06	0.00788491	Significant
X4993.16	GSTA3	GSTA3	0.0100451	0.00405855	0.0136288	0.0200605	1	Significant
X5275.28	VAV	VAV1	-0.00586571	0.0028265	0.0384338	0.0523364	1	Significant
X4815.25	TXD12	TXNDC12	-0.0189422	0.0049816	0.000159908	0.000319906	0.570073	Significant
X2645.54	PKC-Z	PRKCZ	-0.011341	0.00251685	8.08703059043624e-06	2.00767855535551e-05	0.0288303	Significant
X21498.3	AL7A1	ALDH7A1	0.0245178	0.00449241	7.36520734188581e-08	2.62307334403825e-07	0.00026257	Significant
X2765.4	GDF-11/8	GDF11|MSTN	0.0383331	0.00733861	2.50003236361116e-07	8.17362675736359e-07	0.000891262	Significant
X2949.6	GX	PLA2G10	-0.0113182	0.00246678	5.56133522882851e-06	1.40611064473572e-05	0.0198262	Significant
X22774.20	SEN34	TSEN34	-0.00941225	0.00218902	2.02738574310549e-05	4.69022074897539e-05	0.0722763	Significant
X13687.5	I-309	CCL1	0.00596185	0.00266733	0.0258155	0.0362903	1	Significant
X7231.37	TM11A	TMPRSS11A	-0.00288672	0.00105588	0.00646511	0.0100384	1	Significant
X13007.66	LCN10	LCN10	-0.0104778	0.00293775	0.000394383	0.000738821	1	Significant
X23656.9	PUS7	PUS7	0.0373256	0.00845264	1.21924620713207e-05	2.93888622611618e-05	0.0434661	Significant
X24413.96	NUDT7	NUDT7	-0.0101995	0.00286067	0.000395122	0.000739817	1	Significant
X2993.1	IL-18 Rb	IL18RAP	-0.00275412	0.00122621	0.0251063	0.035391	1	Significant
X10703.203	SDS3	SUDS3	-0.0105669	0.00268913	9.63187090287686e-05	0.000199241	0.343376	Significant
X9070.1	CQ067	C17orf67	0.00581064	0.00140342	4.01662180673956e-05	8.89394828635188e-05	0.143193	Significant
X24909.40	Phospholipase C-delta-1	PLCD1	0.0811547	0.00850799	4.78393571391181e-20	5.64726186095881e-19	1.70547308200956e-16	Significant
X7178.59	DEPP	DEPP1	-0.0113459	0.00203962	4.19412370665884e-08	1.57748324012415e-07	0.000149521	Significant
X6713.4	LRP11	LRP11	0.0307542	0.00686634	9.1485621302382e-06	2.24928441339994e-05	0.0326146	Significant
X16593.3	FADD	FADD	0.0178937	0.00309425	1.24137785948215e-08	5.1043968501198e-08	4.42551206905386e-05	Significant
X11699.16	TP4A2	PTP4A2	0.0152364	0.00393073	0.000119421	0.000243557	0.425737	Significant
X3591.51	Cadherin-6	CDH6	-0.0120921	0.00263511	5.57728196324625e-06	1.40914317498036e-05	0.019883	Significant
X23662.10	3BP5	SH3BP5	-0.00998491	0.00254256	9.7071739070885e-05	0.000200499	0.346061	Significant
X3208.2	MATN3	MATN3	-0.0141188	0.00249111	2.35625673896922e-08	9.28182903251411e-08	8.40005527442527e-05	Significant
X11145.72	K154L	KIAA1549L	0.0902579	0.0152893	6.24272832934099e-09	2.66850437579144e-08	2.22553264941006e-05	Significant
X6342.10	Nephronectin	NPNT	0.0392443	0.00846339	4.45868428053582e-06	1.14373433737432e-05	0.0158952	Significant
X16863.47	NANP	NANP	-0.00842606	0.00208275	5.9718114984697e-05	0.000128638	0.212895	Significant
X11480.1	Aldehyde dehydrogenase, class 3	ALDH3A1	-0.00331023	0.00147665	0.0253853	0.035742	1	Significant
X11814.29	Met	MET	0.0327402	0.00528831	1.18819821201894e-09	5.76316547734357e-09	4.23592662584752e-06	Significant
X3342.76	ABL2	ABL2	0.00965331	0.00334195	0.00402553	0.00646442	1	Significant
X15472.16	LRP11	LRP11	0.0595319	0.0102622	1.11492424954338e-08	4.61102662369159e-08	3.97470494962215e-05	Significant
X25245.22	RIC8A	RIC8A	0.0415465	0.00577655	2.21808228729196e-12	1.51483972302602e-11	7.90746335419584e-09	Significant
X23006.19	PI42B	PIP4K2B	-0.0121636	0.00205452	5.6972483192729e-09	2.4529819152425e-08	2.03106902582079e-05	Significant
X13623.4	MLL2	KMT2D	-0.0123551	0.00223546	5.06386215653416e-08	1.87268346349007e-07	0.000180527	Significant
X10572.65	CST8	CST8	0.0374961	0.0108252	0.000574148	0.00105399	1	Significant
X18833.76	PEA15	PEA15	0.0865621	0.011086	3.15017795628778e-14	2.61171730561999e-13	1.12303844141659e-10	Significant
X13668.44	Dtk	TYRO3	0.0473073	0.00717281	1.00339207896259e-10	5.74172192857405e-10	3.57709276150163e-07	Significant
X22377.27	IER2	IER2	-0.0134603	0.00264992	5.2203452033416e-07	1.59336735016377e-06	0.00186105	Significant
X15394.79	UNC5B	UNC5B	0.0376586	0.00668677	2.85244835234142e-08	1.10652648270916e-07	0.00010169	Significant
X2891.1	CD22	CD22	-0.012495	0.00249237	7.25436500641251e-07	2.15335647359372e-06	0.00258618	Significant
X21991.79	NEB2	PPP1R9B	-0.00915902	0.00196105	3.78184506848934e-06	9.82673299501786e-06	0.0134823	Significant
X5735.54	C1GLC	C1GALT1C1	0.0474508	0.00905856	2.31861610275172e-07	7.63237895319472e-07	0.000826587	Significant
X18945.11	RGS1	RGS1	-0.0109266	0.00212597	3.85945365015136e-07	1.21278861825438e-06	0.0013759	Significant
X20433.19	RM01	MRPL1	-0.0118223	0.00231686	4.62844090188131e-07	1.43357009689026e-06	0.00165004	Significant
X7071.23	MA1B1	MAN1B1	0.0229301	0.00454851	6.32328720892056e-07	1.89911700925036e-06	0.00225425	Significant
X6262.14	IL-17B R	IL17RB	-0.0162008	0.00259326	8.46435501063377e-10	4.22033924656075e-09	3.01754256129094e-06	Significant
X3854.24	NACA	NACA	-0.0139827	0.00279907	8.00389553089716e-07	2.35428115244624e-06	0.00285339	Significant
X10056.5	FOXM1	FOXM1	-0.0114981	0.00217547	1.81807983074524e-07	6.08587286066364e-07	0.000648145	Significant
X4153.11	alpha-1-antichymotrypsin complex	SERPINA3	0.024276	0.00603258	6.52077515337722e-05	0.000138868	0.232466	Significant
X5441.67	Troponin I	TNNI3	0.00348199	0.00129979	0.00760933	0.0116827	1	Significant
X12772.8	NUP98	NUP98	-0.00949929	0.00221186	2.07438418333779e-05	4.79272820064758e-05	0.0739518	Significant
X12848.9	ARHG2	ARHGEF2	-0.0133896	0.00243522	5.91368098310053e-08	2.13816153192225e-07	0.000210823	Significant
X20590.13	NPY	NPY	-0.0244836	0.0108507	0.024442	0.0345229	1	Significant
X21655.18	FOPNL	CEP20	-0.0103584	0.00396945	0.00932668	0.0141187	1	Significant
X23038.63	UNC5B	UNC5B	0.0414008	0.00721058	1.55429544594119e-08	6.31820212631738e-08	5.54106326478034e-05	Significant
X11152.46	kallikrein 13	KLK13	-0.021016	0.00664818	0.00166023	0.00284417	1	Significant
X9744.139	DNJA4	DNAJA4	0.00573428	0.00239981	0.0172457	0.0249617	1	Significant
X25963.2	XPO5	XPO5	-0.0131276	0.00247944	1.75661045777658e-07	5.90227736284025e-07	0.000626232	Significant
X10974.20	ISK7	SPINK7	-0.0102631	0.00272366	0.000182916	0.000361874	0.652097	Significant
X19251.56	Platelet proteoglycan	SRGN	-0.00597091	0.00194291	0.00222581	0.00375355	1	Significant
X13123.3	FLRT3:ECD	FLRT3	0.036163	0.00599762	3.03662544867511e-09	1.37053759381879e-08	1.08255697245268e-05	Significant
X14655.1	DJC17	DNAJC17	-0.00825083	0.00195111	2.75708939577156e-05	6.25653959002267e-05	0.0982902	Significant
X3470.1	sE-Selectin	SELE	-0.0407734	0.0137571	0.00317122	0.00517884	1	Significant
X20083.1	RAB6A	RAB6A	0.044631	0.00772986	1.34615703990358e-08	5.52522030160077e-08	4.79904984725626e-05	Significant
X16845.15	MPZL1	MPZL1	0.0228011	0.00338866	4.43819866620831e-11	2.65918962101389e-10	1.58221782450326e-07	Significant
X11540.37	FOXO3A	FOXO3	-0.0108149	0.00207506	2.67092953628999e-07	8.67200710097797e-07	0.000952186	Significant
X25280.2	LIMD1	LIMD1	0.0540579	0.00838742	2.53086321956648e-10	1.37748509584038e-09	9.0225273777545e-07	Significant
X5654.70	TMX3	TMX3	0.0485537	0.00819405	5.50146236694713e-09	2.38018365754448e-08	1.96127133381665e-05	Significant
X12532.28	UB2R1	CDC34	0.0188567	0.00450511	3.31880078531425e-05	7.44204979843026e-05	0.118315	Significant
X16768.3	PLAK	JUP	0.0170146	0.00259375	1.27629918046117e-10	7.21078697043434e-10	4.55000657834407e-07	Significant
X10738.11	fibulin 5	FBLN5	0.0474233	0.00950665	8.22398609794938e-07	2.4090805619712e-06	0.00293185	Significant
X8786.6	F171B:ECD	FAM171B	0.0833503	0.0153675	8.83580643392088e-08	3.10341378688945e-07	0.000314996	Significant
X3461.58	PGCB	BCAN	0.0467615	0.00877404	1.43994195389574e-07	4.88894577679839e-07	0.000513339	Significant
X13632.10	Zyxin	ZYX	0.0162275	0.00625712	0.00976134	0.0147392	1	Significant
X4158.54	uPA	PLAU	0.00388298	0.0013348	0.00377482	0.00609323	1	Significant
X7773.20	KI2L2	KIR2DL2	-0.0087247	0.0018281	2.33953061003477e-06	6.32329539406668e-06	0.00834043	Significant
X12783.29	HNRPM	HNRNPM	0.0135887	0.0031098	1.49839878924173e-05	3.54700643004433e-05	0.0534179	Significant
X16807.35	TNNT3	TNNT3	-0.0106879	0.00260459	4.70738280984317e-05	0.000103273	0.167818	Significant
X6260.14	Tenascin	TNC	0.0415603	0.00900727	4.91955379059122e-06	1.25094217285718e-05	0.0175382	Significant
X14054.17	IL-15 Ra	IL15RA	0.0399786	0.00761606	2.19315456379575e-07	7.23944075919616e-07	0.00078186	Significant
X12649.80	Malate dehydrogenase 2	MDH2	0.079911	0.00837566	4.61656298654605e-20	5.48601568234556e-19	1.64580470470367e-16	Significant
X18270.10	TAF10	TAF10	-0.012394	0.00280771	1.22281235552882e-05	2.94549057260827e-05	0.0435933	Significant
X22403.13	H2B1K	H2BC12	-0.0481649	0.0174236	0.00589594	0.00921483	1	Significant
X8080.24	PSMP	MSMP	0.0545055	0.0145022	0.000189294	0.000372836	0.674833	Significant
X7812.11	calgranulin B	S100A9	-0.00865774	0.00285497	0.00254307	0.00425635	1	Significant
X7146.5	PDIA4	PDIA4	0.00678913	0.00175369	0.00012162	0.000247899	0.433576	Significant
X14023.84	BSP	IBSP	0.0240271	0.00953182	0.0120048	0.0178395	1	Significant
X25087.11	DTNA	DTNA	0.0206736	0.00272789	1.57852212220545e-13	1.23952232723842e-12	5.62743136566243e-10	Significant
X2514.65	Ephrin-B3:ECD	EFNB3	0.0455926	0.00712636	3.38496674188191e-10	1.8011054380312e-09	1.2067406434809e-06	Significant
X9254.18	FCERA	FCER1A	-0.00688338	0.00227759	0.00262762	0.00438141	1	Significant
X16831.7	DOK1	DOK1	-0.00999992	0.00216274	4.71942348994841e-06	1.20521094138009e-05	0.0168247	Significant
X11425.31	RUFY1	RUFY1	0.00663821	0.00205087	0.00128359	0.00224571	1	Significant
X19496.1	NPL	NPL	-0.00721091	0.00280358	0.0103794	0.0156129	1	Significant
X12571.14	ARL3	ARL3	0.0106881	0.00310965	0.000633078	0.00115562	1	Significant
X21708.149	FCGRN	FCGRT	0.0417444	0.00949253	1.31785569563279e-05	3.15948591454667e-05	0.0469816	Significant
X7195.119	EPHA7	EPHA7	0.0246514	0.0051273	1.98346756507044e-06	5.45185957554057e-06	0.00707106	Significant
X9115.78	ADEC1	ADAMDEC1	-0.0127801	0.00258233	9.96612701983352e-07	2.87919309770717e-06	0.00355292	Significant
X10615.18	MYP0	MPZ	0.0256038	0.00430378	4.84850178664045e-09	2.12084771403352e-08	1.72849088693732e-05	Significant
X19360.22	LRRT1	LRRTM1	0.0836784	0.0108429	5.64368605491161e-14	4.57266836039997e-13	2.01197407857599e-10	Significant
X20968.22	EXOS5	EXOSC5	-0.00429888	0.00136617	0.00174252	0.00298228	1	Significant
X21999.61	NUCB2	NUCB2	0.0313225	0.00425476	6.6893114800557e-13	4.8767679808586e-12	2.38473954263986e-09	Significant
X11266.8	SELPL:ECD	SELPLG	0.0079835	0.00224178	0.000402815	0.000753033	1	Significant
X20211.75	GBP5	GBP5	-0.0135388	0.00294973	5.53967202071989e-06	1.40162744881948e-05	0.0197489	Significant
X7054.87	CLC2D	CLEC2D	-0.0119517	0.00223281	1.28457943947286e-07	4.39493829339803e-07	0.000457953	Significant
X15358.28	7B2	SCG5	0.0426254	0.0101848	3.3191750854149e-05	7.44204979843026e-05	0.118329	Significant
X25211.14	GBG12	GNG12	-0.0160769	0.00287239	3.50823094637249e-08	1.33913122315532e-07	0.000125068	Significant
X13490.1	MPP6	MPP6	-0.00737888	0.00246586	0.00289507	0.00478042	1	Significant
X12830.4	SAP18	SAP18	-0.0156365	0.00222296	6.08652757502423e-12	4.01823533425211e-11	2.16984708049614e-08	Significant
X7104.71	CABP7	CABP7	-0.0258983	0.00351168	6.08869704138832e-13	4.47550617578337e-12	2.17062049525494e-09	Significant
X17777.31	SDSL	SDSL	0.0126086	0.00290744	1.73019959981706e-05	4.0446961136707e-05	0.0616816	Significant
X22483.109	K2C71	KRT71	0.00784077	0.00360594	0.0301116	0.0418837	1	Significant
X2774.10	IL-16	IL16	0.0342362	0.0110678	0.00208231	0.0035249	1	Significant
X11232.46	Holo-TC I	TCN1	-0.0130359	0.00212215	1.57446337451172e-09	7.47398392827468e-09	5.61296193013428e-06	Significant
X22526.81	PDHB	PDHB	-0.0184622	0.00389257	2.69220773191135e-06	7.17854941231411e-06	0.00959772	Significant
X2603.61	B7	CD80	-0.0134837	0.00237026	2.10783994922713e-08	8.36798376280036e-08	7.51444941899472e-05	Significant
X13435.31	IL-20 Rb	IL20RB	0.0108848	0.00213864	5.06498244239534e-07	1.55392963916862e-06	0.00180567	Significant
X10558.26	PCDH9	PCDH9	0.052909	0.00930584	2.11652462778787e-08	8.39311490329673e-08	7.54541029806376e-05	Significant
X24915.123	CAN13	CAPN13	0.0251482	0.00438397	1.61368916129945e-08	6.53957162247657e-08	5.75280186003254e-05	Significant
X11514.196	CD59	CD59	0.0382789	0.0061441	9.29171709230829e-10	4.58160047497636e-09	3.31249714340791e-06	Significant
X8418.30	b-Catenin	CTNNB1	-0.0089696	0.00319489	0.00517148	0.00815766	1	Significant
X15308.108	VWC2	VWC2	0.0388825	0.0089427	1.63754128125211e-05	3.84586902621587e-05	0.0583783	Significant
X5364.7	SET	SET	0.02183	0.00683986	0.00149711	0.00258837	1	Significant
X9841.197	Multifunctional protein ADE2	PAICS	-0.00949429	0.00234865	6.0741564535837e-05	0.000130605	0.216544	Significant
X15365.41	BAI3	ADGRB3	0.0518792	0.00800477	2.03816040566163e-10	1.12673470285072e-09	7.26604184618371e-07	Significant
X16927.9	Coagulation factor XIII	F13A1|F13B	-0.0228145	0.0104864	0.0300093	0.0417576	1	Significant
X24294.13	CTF8	CHTF8	-0.00931273	0.00247075	0.000181819	0.000359903	0.648185	Significant
X21403.39	TSC2	TSC2	-0.00980224	0.00201741	1.54889719539263e-06	4.33423744236635e-06	0.00552182	Significant
X22950.6	BT3A3	BTN3A3	0.0127458	0.00362703	0.000479169	0.000888319	1	Significant
X6617.12	FCRL6	FCRL6	-0.0138781	0.00258654	1.1978551351216e-07	4.12196289257578e-07	0.000427035	Significant
X9229.9	CTRL	CTRL	-0.0119385	0.00327292	0.000290952	0.000556462	1	Significant
X24712.6	GTPBA	GTPBP10	-0.0126773	0.00371216	0.000690601	0.00125356	1	Significant
X23588.9	HSDL2	HSDL2	0.0411896	0.00709639	1.09381106192564e-08	4.53422841368012e-08	3.89943643576491e-05	Significant
X21793.4	FR1OP	CEP43	-0.010939	0.00361802	0.00262043	0.00437147	1	Significant
X21457.141	CQ10A	COQ10A	-0.0060009	0.00294606	0.0421415	0.0568855	1	Significant
X3873.51	TMA	TPO	-0.0175347	0.00258091	2.88368803288547e-11	1.76335297379703e-10	1.02803478372367e-07	Significant
X4292.5	SNAA	NAPA	0.116127	0.0171835	3.77547962287426e-11	2.27357852289641e-10	1.34595848555467e-07	Significant
X23382.30	VCX3	VCX3A	-0.0119198	0.00254303	3.5102399563007e-06	9.18122189597358e-06	0.012514	Significant
X7915.31	APLP2	APLP2	0.056433	0.00896724	6.36254425378024e-10	3.24035289496094e-09	2.26824702647266e-06	Significant
X8837.8	MFA3L	MFAP3L	-0.00808515	0.00173206	3.87607073910924e-06	1.00422908320672e-05	0.0138182	Significant
X21754.5	ZRAN1	ZRANB1	-0.0068015	0.00144294	3.1017609549026e-06	8.17935406886686e-06	0.0110578	Significant
X12625.138	KLHL7	KLHL7	-0.00907525	0.00207012	1.40557546453983e-05	3.35175687697959e-05	0.0501088	Significant
X20454.24	SOSB2	NABP1	-0.00688446	0.00250645	0.00621864	0.00968944	1	Significant
X2682.68	HSP 60	HSPD1	0.120927	0.0158623	1.10639871144123e-13	8.74570156604875e-13	3.94431140628798e-10	Significant
X7228.2	SIA7F	ST6GALNAC6	0.0105819	0.00374062	0.00484791	0.00768124	1	Significant
X16854.17	LSM4	LSM4	-0.010797	0.00259424	3.66770894771557e-05	8.17211399912875e-05	0.130754	Significant
X18242.8	Sperm protein 17	SPA17	0.00357796	0.00120233	0.0030537	0.0050191	1	Significant
X10560.1	ITM2C:N-term	ITM2C	-0.00929231	0.00382529	0.0154554	0.0225906	1	Significant
X2500.2	Angiopoietin-4	ANGPT4	-0.0121815	0.00239406	4.9939465764775e-07	1.53610177266111e-06	0.00178034	Significant
X8601.167	sLRP1:CD	LRP1	-0.00989717	0.00199574	9.50260385252463e-07	2.75869566239823e-06	0.00338768	Significant
X22548.18	RGS13	RGS13	-0.0103304	0.00337395	0.00230976	0.00388776	1	Significant
X6604.59	CD031	NDNF	-0.0132495	0.00260633	5.12317040995565e-07	1.57043013856336e-06	0.00182641	Significant
X8287.17	CLM2	CD300E	-0.00969421	0.00230094	2.95897621120406e-05	6.69761917012221e-05	0.105488	Significant
X21387.64	MEP1A	MEP1A	-0.0243267	0.0118387	0.0403742	0.0547486	1	Significant
X3423.59	Chymase	CMA1	-0.00905077	0.0024278	0.000213208	0.000416714	0.760086	Significant
X8994.65	SLAMF8	SLAMF8	0.0072001	0.00188454	0.000148805	0.000298879	0.530491	Significant
X23029.3	SH3G3	SH3GL3	-0.00860249	0.0021368	6.50116099021177e-05	0.000138533	0.231766	Significant
X19141.22	DAP1	DAP	-0.0115044	0.00229954	7.6295690012129e-07	2.25534108535025e-06	0.00271994	Significant
X8953.47	HDGF	HDGF	-0.00877663	0.00307354	0.00447388	0.00712662	1	Significant
X13976.9	ARHG1	ARHGEF1	-0.00895817	0.0020704	1.79952351253034e-05	4.1875335001114e-05	0.064153	Significant
X6290.3	UTS2B	UTS2B	-0.0108731	0.00208786	2.71360043840089e-07	8.80253463412118e-07	0.000967399	Significant
X11851.21	TREM2	TREM2	0.078077	0.0129896	3.36887613187007e-09	1.50879942338151e-08	1.20100434101168e-05	Significant
X17164.15	annexin IV	ANXA4	-0.0125334	0.00317232	8.80912024332643e-05	0.000183117	0.314045	Significant
X8900.28	NEO1	NEO1	0.0364821	0.00599729	2.20651618138938e-09	1.02558411820771e-08	7.86623018665314e-06	Significant
X5028.59	sCD163	CD163	0.0335171	0.00736483	6.58940724991039e-06	1.65082479591922e-05	0.0234912	Significant
X11378.37	KSYK:SH2, 1 and 2	SYK	-0.00662157	0.00269364	0.0142738	0.0209754	1	Significant
X7008.13	F176C:CD	EVA1C	0.00789722	0.00277652	0.00461891	0.0073347	1	Significant
X15669.7	BRAF1	BRAF	-0.00773535	0.00297507	0.00957992	0.0144779	1	Significant
X5730.60	BRAK	CXCL14	-0.0094286	0.00216975	1.65758761595075e-05	3.88769727030554e-05	0.059093	Significant
X20586.18	CNTN3	CNTN3	0.0599314	0.00856262	7.53763788695413e-12	4.89465921074526e-11	2.68716790669915e-08	Significant
X13711.10	CLH1	CLTC	-0.00992415	0.00185007	1.20460443707479e-07	4.13720117357575e-07	0.000429441	Significant
X8018.43	VSIG2	VSIG2	0.0237351	0.00499958	2.64138539664975e-06	7.06741178612478e-06	0.00941654	Significant
X6536.54	LAML2	PLBD2	-0.0107391	0.00244094	1.30638151403494e-05	3.13619535187512e-05	0.0465725	Significant
X5792.8	AFP	AFP	-0.00770394	0.00233974	0.00105755	0.00187477	1	Significant
X22073.47	AT5F1	ATP5PB	-0.00295607	0.00126637	0.0199465	0.028586	1	Significant
X13450.49	UBP8	USP8	-0.00919649	0.002134	1.94098944499996e-05	4.50203472441435e-05	0.0691963	Significant
X15594.47	HTRA1	HTRA1	0.0177357	0.00515645	0.000627937	0.001148	1	Significant
X9875.107	THOC1	THOC1	-0.0121976	0.00222386	6.37531711489195e-08	2.29112958816429e-07	0.00022728	Significant
X5756.66	PAPP2	PAPPA2	-0.0135126	0.00243906	4.71132060037159e-08	1.75139290305784e-07	0.000167959	Significant
X15370.5	BOLA1	BOLA1	0.0443875	0.00687176	2.34095677554327e-10	1.28195251994036e-09	8.34551090481176e-07	Significant
X21397.21	PRTG	PRTG	0.0325303	0.0075944	2.1797660268471e-05	5.01346186174833e-05	0.0777087	Significant
X18196.8	Afamin	AFM	-0.0495828	0.0104189	2.49218089944042e-06	6.71551391270227e-06	0.00888462	Significant
X10647.18	ASCC1	ASCC1	0.015664	0.00405867	0.00012744	0.000258874	0.454324	Significant
X23356.32	CCD24	CCDC24	-0.0413472	0.00726441	2.14288885097631e-08	8.48822083747838e-08	7.63939875373054e-05	Significant
X7959.34	CADH7	CDH7	0.0310104	0.00708877	1.46113200230543e-05	3.47262372547924e-05	0.0520894	Significant
X19516.10	HMGA2	HMGA2	-0.0145468	0.00243881	4.42481188079568e-09	1.96199681032793e-08	1.57744543550366e-05	Significant
X8428.102	NTRI	NTM	0.0195327	0.00286509	2.43984617421719e-11	1.50485321991078e-10	8.69805161108428e-08	Significant
X20991.2	LIMD2	LIMD2	-0.0116815	0.00241388	1.70786824862328e-06	4.76412387037715e-06	0.00608855	Significant
X3314.74	GFRa-1	GFRA1	0.0269549	0.00716255	0.000185837	0.000366431	0.662508	Significant
X19388.2	Cadherin-12:ECD	CDH12	0.0247872	0.00474044	2.43449136462399e-07	7.97698687029828e-07	0.000867896	Significant
X18337.4	GMDS	GMDS	0.0112657	0.00282426	7.59390560312363e-05	0.000159062	0.270723	Significant
X7766.25	ZP4	ZP4	0.013868	0.00329031	2.92943900908701e-05	6.63919266840127e-05	0.104435	Significant
X5825.49	IFN-g R1	IFNGR1	0.027978	0.00465156	3.3301018335343e-09	1.49330981591821e-08	1.18718130365498e-05	Significant
X25473.62	FNTA	FNTA	0.00575968	0.00202797	0.00467815	0.00742217	1	Significant
X21210.33	DPOLB	POLB	-0.0105008	0.00259844	6.0800518184543e-05	0.000130653	0.216754	Significant
X18859.7	4EBP3	EIF4EBP3	0.00565097	0.00189493	0.00299195	0.0049267	1	Significant
X6441.62	ATS6	ADAMTS6	-0.00991788	0.00194191	4.51532312751353e-07	1.40218875867472e-06	0.00160971	Significant
X7155.46	C4b-binding protein beta chain	C4BPB	-0.0131857	0.00522631	0.0119321	0.0177537	1	Significant
X8348.4	EPHB2	EPHB2	0.0396054	0.00688067	1.44512562109979e-08	5.89459134922283e-08	5.15187283922075e-05	Significant
X24958.3	RFX5	RFX5	-0.00952616	0.00201747	2.971167841971e-06	7.85772504200788e-06	0.0105922	Significant
X13535.2	C43BP:PH domain	CERT1	-0.00712493	0.00239633	0.00307757	0.00505368	1	Significant
X23336.2	KCNRG	KCNRG	-0.00910209	0.00379479	0.0168063	0.0243952	1	Significant
X12014.19	PTPS	PTS	-0.00823178	0.00236411	0.000538416	0.000989919	1	Significant
X5404.53	DR6	TNFRSF21	0.0285278	0.00453869	6.65871460096035e-10	3.36713724147853e-09	2.37383175524237e-06	Significant
X22792.21	SYWM	WARS2	-0.0128534	0.00266577	1.85403587530191e-06	5.13170644056779e-06	0.00660964	Significant
X21373.8	QTRD1	QTRT2	0.0182642	0.00311726	8.15681692186201e-09	3.44130796762581e-08	2.90790523264381e-05	Significant
X10046.55	cIAP-1	BIRC2	0.0084763	0.00152105	4.12644426644253e-08	1.55669564125583e-07	0.000147108	Significant
X22969.12	MCP-3	CCL7	-0.013979	0.00261458	1.32428368483303e-07	4.51777161380838e-07	0.000472107	Significant
X16551.14	STA5B	STAT5B	-0.00809211	0.00187972	1.98124188896199e-05	4.58942646793339e-05	0.0706313	Significant
X9025.5	AHSP	AHSP	0.0250383	0.00714658	0.000498563	0.000920443	1	Significant
X9869.28	NF-kappa-B p105	NFKB1	-0.00764156	0.00207534	0.000255097	0.000492518	0.90942	Significant
X15372.43	BRD2	BRD2	-0.00902177	0.00232453	0.000116832	0.000238823	0.416508	Significant
X20401.19	BUD31	BUD31	-0.0121647	0.00197366	1.38330150109633e-09	6.62831969275325e-09	4.93146985140842e-06	Significant
X17756.69	DCTD	DCTD	0.00629041	0.00165666	0.000163238	0.000326019	0.581944	Significant
X7994.41	ERO1B	ERO1B	0.00453624	0.00210118	0.0312948	0.0433266	1	Significant
X6296.36	OIT3	OIT3	-0.00958597	0.00204558	3.52610499309847e-06	9.21595623196191e-06	0.0125706	Significant
X16746.12	Activin B	INHBB	-0.00853772	0.00198942	2.10625169117498e-05	4.85691285836921e-05	0.0750879	Significant
X25481.66	ATX10	ATXN10	-0.0125822	0.00303911	4.03169427109673e-05	8.92178154963367e-05	0.14373	Significant
X25209.15	ATNG	FXYD2	0.00486301	0.00233527	0.037774	0.0514969	1	Significant
X22113.2	COQ6	COQ6	0.0118696	0.00281596	2.93164813148932e-05	6.63997813771247e-05	0.104513	Significant
X6900.30	UB2J1	UBE2J1	-0.0102692	0.00192285	1.37685872212793e-07	4.68815792204973e-07	0.00049085	Significant
X6941.11	SUMF1	SUMF1	-0.00786208	0.00193624	5.6321492192185e-05	0.000121689	0.200786	Significant
X4224.7	HNRPQ	SYNCRIP	-0.012587	0.00227639	5.01535475449394e-08	1.85667078917662e-07	0.000178797	Significant
X25059.18	HDAC6	HDAC6	-0.0101981	0.00252912	6.32562048116753e-05	0.000135197	0.225508	Significant
X24636.9	Dr1-associated corepressor	DRAP1	-0.0105817	0.00204174	3.09147431852979e-07	9.88439995117372e-07	0.00110211	Significant
X4394.71	FGF-8A	FGF8	-0.00276246	0.00119462	0.0211305	0.0301441	1	Significant
X3299.29	Contactin-5	CNTN5	0.0414096	0.00639498	2.1111272214043e-10	1.16144576301024e-09	7.52616854430633e-07	Significant
X12490.92	LTOR3	LAMTOR3	0.0147395	0.00336994	1.4646616601783e-05	3.47516967398866e-05	0.0522152	Significant
X9121.28	FUT2	FUT2	0.0131994	0.001738	1.3651412119849e-13	1.07433298470776e-12	4.86672842072617e-10	Significant
X7096.30	RMD1	RMDN1	0.0346126	0.010897	0.00157564	0.00271361	1	Significant
X13503.19	PRAF3	ARL6IP5	-0.0112463	0.00215334	2.51313887512419e-07	8.18204574412579e-07	0.000895934	Significant
X20954.27	LDOCL	RTL6	-0.00994852	0.00274563	0.000318262	0.000605769	1	Significant
X7790.21	LIF	LIF	-0.0126192	0.00265598	2.59163371261419e-06	6.95720947701023e-06	0.00923917	Significant
X8038.41	NSDHL	NSDHL	-0.00893362	0.00182437	1.28799171962584e-06	3.66748440931799e-06	0.00459169	Significant
X21949.4	AB1IP	APBB1IP	-0.0075669	0.00222184	0.000708874	0.00128411	1	Significant
X6473.55	PLUNC	BPIFA1	-0.0119131	0.00294009	5.85375366801712e-05	0.000126171	0.208686	Significant
X21940.12	WN10B	WNT10B	-0.0395034	0.00531829	4.30583689220694e-13	3.22485473124322e-12	1.53503085207177e-09	Significant
X3874.8	UB2L3	UBE2L3	-0.0122834	0.00274024	9.00361950293803e-06	2.21517622691332e-05	0.0320979	Significant
X13694.24	TSLP R	CRLF2	-0.00401507	0.00126421	0.00157982	0.00271949	1	Significant
X9769.48	DNER:ECD	DNER	0.0430799	0.00814955	1.80773491285479e-07	6.06262931733521e-07	0.000644457	Significant
X24664.3	INM02	EMC10	0.0455982	0.00810534	2.95434905718702e-08	1.1435672517776e-07	0.000105323	Significant
X21282.21	TNIP1	TNIP1	0.00547025	0.00135688	6.34171056159501e-05	0.00013546	0.226082	Significant
X7696.3	NBR1	NBR1	0.0134467	0.00237007	2.27334222053029e-08	8.98499447471229e-08	8.10446501619048e-05	Significant
X8957.72	XTP3B	ERLEC1	0.0434335	0.00629368	1.43031331061863e-11	9.040898851694e-11	5.09906695235542e-08	Significant
X25225.14	FHL17	FTHL17	-0.00907432	0.00197294	5.26552517541124e-06	1.33510649006693e-05	0.0187716	Significant
X20927.43	T2FB	GTF2F2	-0.0126473	0.00228941	5.15606729184917e-08	1.90480620678158e-07	0.000183814	Significant
X2617.56	ERBB3	ERBB3	0.0410522	0.00865092	2.65610936723439e-06	7.09290628778322e-06	0.00946903	Significant
X8219.14	ZG16	ZG16	-0.00948662	0.00259296	0.000279197	0.000535415	0.995336	Significant
X4132.27	FST	FST	-0.0154079	0.00230926	6.21560040313912e-11	3.66864493993228e-10	2.2158615437191e-07	Significant
X21260.74	RUXE	SNRPE	-0.00715841	0.00195544	0.000275996	0.000529561	0.983924	Significant
X7090.17	GALT1	GALNT1	0.0597651	0.00881705	3.15014922811367e-11	1.9131655874319e-10	1.12302819982252e-07	Significant
X4673.13	IL-6	IL6	-0.0139302	0.00452882	0.00220647	0.0037227	1	Significant
X13104.32	EFNB1	EFNB1	0.0374931	0.00621216	2.92868154225347e-09	1.32665180408305e-08	1.04407496981336e-05	Significant
X11138.16	RUNX3	RUNX3	-0.0113652	0.00211848	1.20078287513118e-07	4.12805298924075e-07	0.000428079	Significant
X13094.75	RSPO3	RSPO3	0.0262101	0.00536845	1.38130708523123e-06	3.91443542038898e-06	0.00492436	Significant
X13468.5	NEUL4	NEURL4	-0.00911521	0.00164539	4.74006650824117e-08	1.76024344811248e-07	0.000168983	Significant
X9078.207	SNTB1	SNTB1	-0.00622241	0.00222818	0.00541406	0.00850644	1	Significant
X3029.52	DC-SIGN	CD209	0.0489282	0.0099391	1.13056210947373e-06	3.24513198089682e-06	0.00403045	Significant
X8976.13	B4GN1	B4GALNT1	0.0147449	0.00295505	8.17543038507898e-07	2.39682642457291e-06	0.00291454	Significant
X11158.40	BICR1	BICDL1	0.00422367	0.00143306	0.00334384	0.00543831	1	Significant
X24235.2	EHD1	EHD1	0.0570693	0.0073771	5.05262445943641e-14	4.1218778484876e-13	1.80126061978908e-10	Significant
X22098.10	CCYL1	CCNYL1	0.0116413	0.00268282	1.70616683410457e-05	3.99637632298475e-05	0.0608248	Significant
X23291.18	PCLI1	PID1	-0.00545378	0.0020053	0.00674821	0.0104506	1	Significant
X25270.3	PML	PML	-0.0119738	0.00241941	9.95429093792287e-07	2.87810601733131e-06	0.0035487	Significant
X25054.15	PRP19	PRPF19	-0.00450234	0.00215247	0.0369394	0.0504556	1	Significant
X9511.61	NXPH2	NXPH2	0.0643898	0.0100244	2.90050934501512e-10	1.55493470901938e-09	1.03403158149789e-06	Significant
X6326.20	BMP-4	BMP4	-0.0102016	0.0022745	8.9039867946081e-06	2.19520836257108e-05	0.0317427	Significant
X12846.3	FBXL5	FBXL5	0.00365285	0.00135864	0.00739566	0.0113846	1	Significant
X6904.14	LRRT2	LRRTM2	0.0580113	0.00888491	1.5075255505436e-10	8.46350958691013e-10	5.37432858768793e-07	Significant
X3902.21	SKP1	SKP1	-0.0165896	0.00239099	1.1353442386742e-11	7.24061218403135e-11	4.04750221087352e-08	Significant
X25115.21	FHOD1	FHOD1	-0.0088595	0.00191065	4.43577075162102e-06	1.14012420544549e-05	0.0158135	Significant
X24253.5	ERF3B	GSPT2	-0.0062816	0.00186721	0.000822371	0.00147547	1	Significant
X23659.2	BZW2	BZW2	-0.00995231	0.00405979	0.0145673	0.0213713	1	Significant
X2418.55	Apo E	APOE	0.0288089	0.00352158	2.06826704479055e-15	1.88577289377962e-14	7.37337201467831e-12	Significant
X2632.5	IL-12 Rb1	IL12RB1	-0.0114627	0.00250191	5.7299979247874e-06	1.44465647820842e-05	0.0204274	Significant
X15534.26	Malate dehydrogenase 2	MDH2	0.0840302	0.0088323	5.76505173013233e-20	6.73849489112189e-19	2.05524094179218e-16	Significant
X18324.61	SUOX	SUOX	0.030957	0.00547386	2.50972775152709e-08	9.84288166578006e-08	8.94717943419408e-05	Significant
X8464.31	RSPO4	RSPO4	0.0112229	0.00266	2.87965595349551e-05	6.53051747723377e-05	0.10266	Significant
X25235.2	DPH7	DPH7	0.0056372	0.00104391	9.99563871671521e-08	3.48332864370379e-07	0.000356345	Significant
X10817.26	TO20L	TOMM20L	-0.0106867	0.00437821	0.0149762	0.0219351	1	Significant
X7156.2	FUT10	FUT10	0.0816533	0.0136717	4.21961586839546e-09	1.8756771285324e-08	1.50429305708298e-05	Significant
X20584.4	nectin-1 gamma:ECD	NECTIN1	0.043591	0.00871167	7.58623817267536e-07	2.24439328511101e-06	0.00270449	Significant
X11333.82	RHG25	ARHGAP25	0.0118158	0.005731	0.0397312	0.0539382	1	Significant
X11208.15	NAGPA	NAGPA	0.0440368	0.00739934	4.76010163518533e-09	2.09503238635009e-08	1.69697623294357e-05	Significant
X21833.6	sirtuin	SIRT6	-0.013474	0.00342883	9.61288061568561e-05	0.000199012	0.342699	Significant
X22777.46	SKP2	SKP2	-0.00697152	0.0017652	8.87458923605838e-05	0.00018437	0.316379	Significant
X21799.15	HOME3	HOMER3	-0.00657306	0.00307955	0.0332596	0.0458331	1	Significant
X12712.9	HM20A	HMG20A	-0.00282058	0.00104659	0.00726053	0.0112003	1	Significant
X9786.310	IEX1	IER3	-0.0122185	0.00243938	7.42484063291311e-07	2.20029566553078e-06	0.00264696	Significant
X24055.44	CSTF1	CSTF1	-0.0114183	0.00396046	0.00409756	0.00656826	1	Significant
X8002.27	Spinesin	TMPRSS5	0.0354058	0.0107457	0.00104829	0.00185928	1	Significant
X17843.30	PPCS	PPCS	-0.00621877	0.00266259	0.0198932	0.0285274	1	Significant
X13735.1	RPGP1	RAP1GAP	0.00774873	0.0016471	3.22892265965286e-06	8.48901864429384e-06	0.0115111	Significant
X21227.18	SULT 1A1*2	SULT1A1	-0.00946247	0.00204119	4.45944103492371e-06	1.14373433737432e-05	0.0158979	Significant
X10756.34	UCN3	UCN3	0.0217778	0.00394119	5.22332581554063e-08	1.92168798064008e-07	0.000186212	Significant
X22824.53	VATC2	ATP6V1C2	0.0233145	0.00720891	0.00130037	0.00227358	1	Significant
X21182.8	SEN15	TSEN15	0.00620467	0.00150912	4.55123308445107e-05	0.000100093	0.162251	Significant
X14670.1	SKIL	SKIL	0.00705448	0.00335205	0.0357909	0.049025	1	Significant
X17761.2	NUDT5	NUDT5	0.0356526	0.00429644	8.74852014344522e-16	8.18595126282998e-15	3.11884743113822e-12	Significant
X20535.68	I17RE	IL17RE	-0.00554048	0.00231738	0.0171527	0.0248473	1	Significant
X6352.8	INSRR	INSRR	0.0268696	0.00555427	1.71491904731865e-06	4.78005191844487e-06	0.00611369	Significant
X23568.41	MEIS2	MEIS2	0.00560196	0.00129065	1.69708914987475e-05	3.97772703438756e-05	0.0605012	Significant
X3081.70	ULBP-1	ULBP1	-0.0117976	0.00246313	2.15607918920497e-06	5.87646965559306e-06	0.00768642	Significant
X24307.22	KDM8	KDM8	-0.00735023	0.00246281	0.00297087	0.00489651	1	Significant
X5738.25	Tenascin	TNC	0.0320733	0.00871045	0.000254213	0.000491203	0.906269	Significant
X9864.38	TTC1	TTC1	0.0819118	0.00924432	1.17047423890358e-17	1.2236776133992e-16	4.17274066169126e-14	Significant
X3026.5	Calpastatin	CAST	0.0228448	0.00485615	3.2470731346225e-06	8.53044637061843e-06	0.0115758	Significant
X8094.20	CISD2	CISD2	-0.0109809	0.00217257	5.90243104280088e-07	1.78172452731458e-06	0.00210422	Significant
X3344.60	Antithrombin III	SERPINC1	-0.00511679	0.00126732	6.18948821331506e-05	0.000132845	0.220655	Significant
X16300.4	TREM2	TREM2	0.060959	0.0125863	1.66426094906519e-06	4.64611611857275e-06	0.00593309	Significant
X19111.10	UBC12	UBE2M	0.00694455	0.00181494	0.000145509	0.000293405	0.51874	Significant
X5691.2	CRLD2	CRISPLD2	-0.00661689	0.00213427	0.00203367	0.00344583	1	Significant
X7879.12	Cytochrome P450 3A4	CYP3A4	-0.00253281	0.0010651	0.0177528	0.0256645	1	Significant
X9993.11	ZN264	ZNF264	-0.0109408	0.00228865	2.26143696005101e-06	6.14483442269958e-06	0.00806202	Significant
X9444.70	DGCR6	DGCR6	-0.00424396	0.001457	0.0037288	0.00602865	1	Significant
X13682.47	M-CSF R	CSF1R	0.0173238	0.00349301	9.45913490616215e-07	2.74831425757686e-06	0.00337218	Significant
X14009.65	TNFAIP3	TNFAIP3	-0.00732406	0.00144187	5.21267038645897e-07	1.59336735016377e-06	0.00185832	Significant
X19372.7	MDGA2	MDGA2	0.0503981	0.00970538	2.9228141567718e-07	9.39570105400493e-07	0.00104198	Significant
X18192.69	MAGE-5	MAGEA5	-0.0106557	0.0034214	0.00194289	0.00330457	1	Significant
X12713.365	RGS19	RGS19	-0.00928997	0.00239583	0.000118364	0.000241539	0.421968	Significant
X6388.21	CC126	CCDC126	0.00524921	0.00126967	4.13974860019904e-05	9.14953735877841e-05	0.147582	Significant
X7152.5	TIMD3	HAVCR2	0.0542577	0.00884027	1.60655394125559e-09	7.6060621521596e-09	5.72736480057618e-06	Significant
X9310.2	CD8B	CD8B	-0.00805998	0.00260903	0.00211143	0.00356912	1	Significant
X6605.17	IGFALS	IGFALS	-0.0333576	0.00956989	0.000530493	0.000976863	1	Significant
X12558.3	UBS3B	UBASH3B	-0.0090424	0.00241594	0.000201907	0.000395711	0.719799	Significant
X4866.59	TrkB	NTRK2	0.0514346	0.0083498	1.40603221681467e-09	6.72819443348228e-09	5.0125048529443e-06	Significant
X3024.18	a2-Antiplasmin	SERPINF2	-0.0316368	0.0104131	0.00249363	0.00417754	1	Significant
X5457.5	COLEC12	COLEC12	0.0188883	0.00596047	0.00161612	0.00277661	1	Significant
X15387.44	Neuropilin-2	NRP2	0.0246095	0.00559437	1.30726810172316e-05	3.13621183219587e-05	0.0466041	Significant
X24967.4	PCDH1	PCDH1	0.021496	0.00606612	0.00042868	0.000799708	1	Significant
X17327.3	CNPY3	CNPY3	0.033512	0.00586961	1.90783489293343e-08	7.59936468525998e-08	6.80143139330768e-05	Significant
X4428.1	CHST2	CHST2	-0.0125426	0.00264743	2.76916757093306e-06	7.36173183473256e-06	0.00987208	Significant
X5008.51	Mn SOD	SOD2	0.0233552	0.00438741	1.48917815611153e-07	5.03692611625959e-07	0.000530892	Significant
X9887.40	RBBP6	RBBP6	-0.00547639	0.00167192	0.00112224	0.00197961	1	Significant
X16823.75	APOL3	APOL3	-0.0140528	0.00343326	4.91314187668743e-05	0.00010739	0.175154	Significant
X14283.12	RAB14	RAB14	0.0220063	0.00687261	0.00144407	0.00250516	1	Significant
X12650.43	GNAI3	GNAI3	-0.00947585	0.00313028	0.00259626	0.0043352	1	Significant
X13519.112	ARHGP	ARHGEF25	0.00704694	0.00172679	5.1707125099937e-05	0.000112744	0.184336	Significant
X4775.34	Gelsolin	GSN	0.0236231	0.00625409	0.000175941	0.000348848	0.627228	Significant
X14692.3	ZN276	ZNF276	-0.0131826	0.00359647	0.000271372	0.000522095	0.967442	Significant
X5202.4	PPID	PPID	-0.00525886	0.00188482	0.00546118	0.00857292	1	Significant
X21433.3	BT3A2	BTN3A2	0.0414358	0.0132907	0.00192098	0.00327356	1	Significant
X9178.30	NEUREGULIN-1	NRG1	0.0109231	0.00247264	1.20360612203889e-05	2.9051156567831e-05	0.0429086	Significant
X9002.36	SPA11	SERPINA11	-0.00998076	0.00234288	2.41290233596209e-05	5.51763747768111e-05	0.08602	Significant
X23541.61	CLYBL	CLYBL	-0.0146799	0.00334689	1.39290045501255e-05	3.32375510182044e-05	0.0496569	Significant
X18253.8	SSB	SSBP1	-0.00804517	0.00218377	0.000252887	0.000488905	0.901542	Significant
X15339.32	COF2	CFL2	0.110276	0.0153678	2.36616621819349e-12	1.61288385618734e-11	8.43538256785979e-09	Significant
X2616.23	ERBB2	ERBB2	-0.0114168	0.00228715	8.07414364525902e-07	2.37298615790176e-06	0.00287843	Significant
X8407.84	NOTC2	NOTCH2	0.0299192	0.00806995	0.000234453	0.000455988	0.835826	Significant
X16610.13	LRP10	LRP10	0.0356892	0.00641915	4.22411961377171e-08	1.58682680959917e-07	0.00015059	Significant
X17785.11	RCL	DNPH1	-0.0104161	0.00219658	2.71308926988273e-06	7.22342288807463e-06	0.00967216	Significant
X24922.19	NHLC2	NHLRC2	-0.00986118	0.00200767	1.19812809129679e-06	3.42528199316203e-06	0.00427133	Significant
X13992.12	NSF	NSF	0.0305372	0.00874013	0.000514848	0.000948543	1	Significant
X15300.66	CC134	CCDC134	0.0610902	0.0107793	2.36260460727773e-08	9.28631248615778e-08	8.42268542494511e-05	Significant
X12662.82	ECH1	ECH1	0.00351451	0.00131614	0.0078214	0.0119774	1	Significant
X7995.16	VWC2L	None	0.0274994	0.0043392	4.9324003630287e-10	2.55953526844211e-09	1.75840072941973e-06	Significant
X3311.27	FCG3B	FCGR3B	0.0214853	0.00560433	0.000140848	0.000284812	0.502124	Significant
X13975.56	LIPA1	PPFIA1	0.00365594	0.00144128	0.0114762	0.0171039	1	Significant
X22578.17	ROBO2	ROBO2	0.0537869	0.00871428	1.31201886780741e-09	6.3037025117701e-09	4.67734726373342e-06	Significant
X20427.18	MED20	MED20	-0.00737564	0.00181634	5.6266989794859e-05	0.000121645	0.200592	Significant
X21547.6	DMP4	FAM20C	0.0435959	0.00721818	2.84717554081877e-09	1.29631938735874e-08	1.01501808030189e-05	Significant
X2788.55	MMP-3	MMP3	0.0233712	0.00622994	0.000195212	0.000383011	0.69593	Significant
X4547.59	FLRT1	FLRT1	0.0239473	0.00405495	6.17785352181426e-09	2.64394331395772e-08	2.20240478052678e-05	Significant
X5468.67	IL-17 RC	IL17RC	0.0109326	0.0035817	0.00238268	0.00400295	1	Significant
X6425.87	MMP19	MMP19	0.0496429	0.0114024	1.59998978040878e-05	3.76747923854511e-05	0.0570396	Significant
X19189.2	UBP14	USP14	0.0272724	0.00575966	2.88054697281652e-06	7.6350557309226e-06	0.0102691	Significant
X6543.182	PRRP	PRLH	-0.0118048	0.00231045	4.48473322776438e-07	1.39390357079163e-06	0.00159881	Significant
X16818.200	CDCP1	CDCP1	0.0232717	0.0064847	0.000362451	0.00068331	1	Significant
X11601.26	DHX8	DHX8	-0.0119261	0.00228291	2.50352307326788e-07	8.17362675736359e-07	0.000892506	Significant
X20591.48	GLDN	GLDN	0.0438263	0.00899527	1.44645872779064e-06	4.06994898545669e-06	0.00515663	Significant
X6897.38	B3GA3	B3GAT3	0.0125238	0.00433657	0.00403252	0.00647273	1	Significant
X9796.4	CEL	CEL	-0.0324883	0.0146588	0.0270962	0.037956	1	Significant
X3466.8	PRKACA	PRKACA	0.016967	0.00531742	0.00150795	0.00260584	1	Significant
X6550.4	ICAM4	ICAM4	-0.00697712	0.00189604	0.000257152	0.000495428	0.916748	Significant
X9018.38	PCD10:ECD	PCDH10	0.0525893	0.00839092	7.42964261382599e-10	3.72527087458364e-09	2.64866759182897e-06	Significant
X24675.2	MAST4	MAST4	0.0628539	0.00972445	2.27033942086574e-10	1.24711248619204e-09	8.09376003538636e-07	Significant
X5624.66	FOLR3	FOLR3	0.0115597	0.00263298	1.36762621469318e-05	3.26563124941808e-05	0.0487559	Significant
X15405.23	IFNA4	IFNA4	-0.0122904	0.00222544	5.17575036560751e-08	1.90812306653472e-07	0.000184516	Significant
X4988.49	FGFR4	FGFR4	-0.011878	0.00249	2.36832824026474e-06	6.3962804367756e-06	0.00844309	Significant
X10076.1	AP4M1	AP4M1	-0.00167072	0.00079386	0.0357958	0.049025	1	Significant
X14112.40	RELT	RELT	0.0139167	0.00295189	3.10565407352969e-06	8.18304269928555e-06	0.0110717	Significant
X4984.83	Esterase D	ESD	0.0709799	0.0135186	2.17705738434237e-07	7.19296531527391e-07	0.000776121	Significant
X13707.27	SPARCL1	SPARCL1	0.0350358	0.00515964	2.93220307221481e-11	1.78688956452065e-10	1.04533039524458e-07	Significant
X3000.66	MBL	MBL2	-0.013346	0.0026602	7.12519542768408e-07	2.11677680830781e-06	0.00254013	Significant
X12659.13	GTPB9	OLA1	0.0516601	0.00819116	6.57849681927743e-10	3.33129846033012e-09	2.3452341160724e-06	Significant
X5643.2	LCN8	LCN8	0.00360467	0.00141798	0.0112929	0.0168589	1	Significant
X2421.7	BDNF	BDNF	-0.0111904	0.0023975	3.84956801518514e-06	9.98087998118911e-06	0.0137237	Significant
X6380.23	ICT1	MRPL58	0.0171386	0.00671544	0.0109854	0.0164551	1	Significant
X12427.8	MPIP2	CDC25B	0.00859961	0.0020154	2.36935328409873e-05	5.43199000502378e-05	0.0844674	Significant
X20539.4	HNP-3	DEFA3	-0.00652334	0.00216383	0.00269541	0.00447978	1	Significant
X18876.77	CHST4	CHST4	-0.00753798	0.00204309	0.000247375	0.000479551	0.881893	Significant
X24910.18	NonO protein	NONO	-0.00666681	0.00265741	0.0124062	0.0183748	1	Significant
X24905.22	CX04A	EOLA1	0.00614264	0.00144515	2.51491958822562e-05	5.73620494691256e-05	0.0896569	Significant
X24490.16	THAP4	THAP4	0.030503	0.00601965	5.57116163215444e-07	1.68887680430532e-06	0.00198612	Significant
X23554.2	SHD	SHD	0.00413282	0.00202404	0.0416558	0.0563152	1	Significant
X16872.248	MAAI	GSTZ1	0.00939246	0.00146323	3.06230443594068e-10	1.63810520086768e-09	1.09171153141285e-06	Significant
X18932.84	NMNA1	NMNAT1	-0.0121246	0.00220484	5.88969504904266e-08	2.13381736278832e-07	0.000209968	Significant
X3810.50	FGR	FGR	-0.0135299	0.00256545	1.93806648408448e-07	6.45631623425517e-07	0.000690921	Significant
X3437.80	Flt-3	FLT3	-0.0115155	0.00225233	4.41857826584076e-07	1.37574074390588e-06	0.00157522	Significant
X11592.1	ELAV1	ELAVL1	-0.012601	0.00235816	1.34057803307999e-07	4.5689872733558e-07	0.000477916	Significant
X12456.5	F263	PFKFB3	-0.00325348	0.0013999	0.0205178	0.0293524	1	Significant
X7268.12	IFNA4	IFNA4	-0.00353365	0.000999632	0.000443259	0.000825179	1	Significant
X16907.3	Nectin-like protein 3	CADM2	0.0459433	0.00802938	1.73511252033065e-08	6.98471111120062e-08	6.18567613497877e-05	Significant
X17682.1	CD46	CD46	0.0454658	0.00789877	1.43322582012085e-08	5.85274919671344e-08	5.10945004873083e-05	Significant
X8894.80	hnRNP A/B	HNRNPAB	-0.0101254	0.00222045	6.33215995178885e-06	1.5874929836939e-05	0.0225742	Significant
X4393.3	FGF-16	FGF16	-0.010062	0.00251566	7.22150936448236e-05	0.000151886	0.257447	Significant
X3506.49	Lymphotoxin a2/b1	LTA|LTB	-0.0118195	0.00256278	5.00165858697988e-06	1.27091324751128e-05	0.0178309	Significant
X12484.67	PIPNB	PITPNB	-0.00871442	0.00217075	6.80083632879218e-05	0.000144487	0.24245	Significant
X25052.3	CRLF3	CRLF3	0.0124773	0.00281008	1.0918907890752e-05	2.65705847307378e-05	0.0389259	Significant
X15436.40	RAMP1	RAMP1	0.00506601	0.00148131	0.00067459	0.00122574	1	Significant
X11678.105	CXD2	GJD2	0.0107313	0.0023037	4.01667439573235e-06	1.03764088556419e-05	0.0143194	Significant
X14144.3	H2A3	H2AW	-0.0375363	0.0184657	0.0425577	0.0574256	1	Significant
X24479.25	T225B	TMEM225B	-0.00347648	0.00156194	0.0264424	0.0370692	1	Significant
X18942.11	PSB9	PSMB9	-0.0449085	0.00892907	6.68631798802825e-07	2.00140416686152e-06	0.00238367	Significant
X4829.43	STRATIFIN	SFN	0.060056	0.00841685	3.46406234424951e-12	2.33007212400934e-11	1.23493822572495e-08	Significant
X12395.86	SYDM	DARS2	-0.0211379	0.00765586	0.00596583	0.00931182	1	Significant
X7852.9	IF3M	MTIF3	-0.0114338	0.00247339	4.76288234686754e-06	1.21370089825467e-05	0.0169797	Significant
X8959.61	ADAM 17:ECD	ADAM17	0.00735964	0.00197973	0.000222252	0.00043344	0.792329	Significant
X2751.16	Azurocidin	AZU1	-0.0132855	0.00245979	9.95125758549494e-08	3.47125570374652e-07	0.000354762	Significant
X3628.3	MP2K2	MAP2K2	-0.00580877	0.0019141	0.0025233	0.00422525	1	Significant
X2523.31	RANTES	CCL5	-0.0201785	0.00306759	1.1149767584969e-10	6.34966796172755e-10	3.97489214404145e-07	Significant
X2431.17	Cathepsin G	CTSG	-0.0113956	0.00264582	1.96771479314264e-05	4.56105542103609e-05	0.070149	Significant
X23307.7	CLUA1	CLUAP1	0.0155953	0.0045547	0.000664367	0.00120852	1	Significant
X7851.30	ANR46	ANKRD46	0.00304297	0.00128915	0.018606	0.0267569	1	Significant
X11406.82	ACAD8	ACAD8	0.0053396	0.0014689	0.000304454	0.000581038	1	Significant
X12433.8	ARL11	ARL11	0.0136532	0.0044126	0.00207517	0.00351449	1	Significant
X10827.67	LIGO3	LINGO3	0.0267645	0.0103361	0.00986955	0.0148836	1	Significant
X19561.216	PLXD1	PLXND1	0.0593894	0.0101307	7.90644988704491e-09	3.34359357619396e-08	2.81864938473151e-05	Significant
X14143.8	H2B2E	H2BC21	-0.0495772	0.0234219	0.0347329	0.0476975	1	Significant
X9532.5	WBP1L	WBP1L	-0.00869846	0.00265021	0.00109745	0.00194164	1	Significant
X8297.8	DJC10	DNAJC10	0.0322032	0.0062617	3.80434647247585e-07	1.19915960869818e-06	0.00135625	Significant
X12925.105	AXIN2	AXIN2	-0.0155424	0.00406439	0.000146471	0.00029501	0.522168	Significant
X21645.6	SNIP1	SNIP1	-0.0102585	0.00335625	0.00234976	0.00394949	1	Significant
X17460.51	Mx1	MX1	-0.0150712	0.00504649	0.00295506	0.00487497	1	Significant
X12430.78	PAIP1	PAIP1	0.00382238	0.00113471	0.0008095	0.0014531	1	Significant
X2635.61	Layilin	LAYN	0.036414	0.00942229	0.000124536	0.000253553	0.443971	Significant
X20928.39	TCAL7	TCEAL7	0.00346975	0.00162217	0.0328818	0.0453477	1	Significant
X16932.5	SULT 1E	SULT1E1	-0.00839329	0.00230442	0.000296163	0.000566124	1	Significant
X20564.53	THY1	THY1	-0.0165654	0.00489444	0.000766943	0.00138298	1	Significant
X22375.15	HXA11	HOXA11	0.00935901	0.00189483	1.04631535156738e-06	3.01545208434738e-06	0.00373011	Significant
X15580.2	EPHA7	EPHA7	0.0240505	0.00449459	1.29751570006045e-07	4.43494100739742e-07	0.000462564	Significant
X21492.19	CLUL1	CLUL1	-0.0335132	0.014583	0.0219357	0.0312429	1	Significant
X7131.8	CETP	CETP	-0.0111286	0.00228341	1.4370932810007e-06	4.05363694999451e-06	0.00512324	Significant
X12616.45	NRBP	NRBP1	0.0131193	0.00281429	3.95711701039361e-06	1.02373890726076e-05	0.0141071	Significant
X6356.3	Carboxypeptidase B1	CPB1	0.0495324	0.0113569	1.5436285939184e-05	3.64198275136936e-05	0.0550304	Significant
X9926.4	S100P	S100P	0.0110529	0.00458093	0.0161583	0.0235505	1	Significant
X25484.120	ARI3C	ARID3C	-0.0120561	0.00246393	1.31070041986946e-06	3.72916759523913e-06	0.00467265	Significant
X5124.69	sICAM-5	ICAM5	0.063508	0.0105174	2.87612567756955e-09	1.30736237989351e-08	1.02533880405354e-05	Significant
X5740.17	ROBO1	ROBO1	0.0444509	0.0084423	2.01109704892697e-07	6.66935905062758e-07	0.000716956	Significant
X25918.60	HLAE	HLA-E	0.0375589	0.00916243	4.7955279221567e-05	0.000105013	0.170961	Significant
X10743.13	SLIK1	SLITRK1	0.0896333	0.0141767	5.32597348227611e-10	2.73984061534117e-09	1.89870954643143e-06	Significant
X8903.1	COX6C	COX6C	-0.00968895	0.00227863	2.49638255872996e-05	5.70121961683043e-05	0.088996	Significant
X14254.27	PTN4	PTPN4	0.0198717	0.00387882	4.23137129028979e-07	1.32207174845601e-06	0.00150848	Significant
X21810.50	MART-1	MLANA	-0.00972948	0.00367272	0.00831093	0.0126672	1	Significant
X4718.5	PPIB	PPIB	-0.00797909	0.00207548	0.000135211	0.00027388	0.482028	Significant
X8468.19	PSA	KLK3	-0.00947473	0.00321804	0.00337943	0.00549119	1	Significant
X23670.11	DPH2	DPH2	0.00393917	0.00135793	0.00387197	0.00624031	1	Significant
X8807.13	SNX1	SNX1	0.00360812	0.0015095	0.0171733	0.0248671	1	Significant
X12538.19	RGS7	RGS7	0.0220083	0.0054996	7.16417046154859e-05	0.000151215	0.255403	Significant
X19163.26	LRC59	LRRC59	-0.01003	0.00240799	3.61958411854658e-05	8.07497958862238e-05	0.129038	Significant
X10746.24	DKK3	DKK3	0.0315599	0.00649394	1.53415965002643e-06	4.29637011181793e-06	0.00546928	Significant
X4162.54	Transferrin	TF	-0.00928502	0.00168612	5.73959145769204e-08	2.09005552059981e-07	0.000204616	Significant
X10630.5	HTAI2	HTATIP2	-0.00485689	0.00209476	0.0207936	0.0297111	1	Significant
X11387.3	ATF6B	ATF6B	0.0378343	0.00762825	9.4489926253713e-07	2.74760674628456e-06	0.00336857	Significant
X23269.40	CKLF4	CMTM4	-0.0128899	0.00608847	0.0347065	0.0476975	1	Significant
X22010.36	PRKRA	PRKRA	-0.00929991	0.00178394	2.63653128106835e-07	8.56812581313461e-07	0.000939923	Significant
X24244.81	RILP	RILP	-0.00743744	0.00313226	0.0179659	0.0258991	1	Significant
X13655.34	Nucleolin	NCL	-0.0123307	0.00200542	1.53138437794656e-09	7.28889894176166e-09	5.45938530737949e-06	Significant
X9250.87	HNP-1	DEFA1	-0.00519583	0.00223466	0.0204414	0.0292547	1	Significant
X13039.1	PP1R8	PPP1R8	-0.0123064	0.00574539	0.0326636	0.0450641	1	Significant
X9110.2	SYT17	SYT17	-0.0100592	0.00250815	6.91296330600074e-05	0.00014652	0.246447	Significant
X8356.88	NEU1	OXT	0.0166659	0.00756995	0.0281119	0.0392861	1	Significant
X2443.10	FGF-8B	FGF8	-0.0123923	0.00270464	5.72253902056705e-06	1.44379699988121e-05	0.0204009	Significant
X9557.5	MANS1	MANSC1	0.0478009	0.0081836	8.90744146347553e-09	3.73149574821272e-08	3.17550288172903e-05	Significant
X21913.5	TYY2	YY2	-0.00860178	0.00319927	0.00739921	0.0113846	1	Significant
X11671.19	BRPF1	BRPF1	-0.012351	0.00198869	1.0488138698837e-09	5.11494041878986e-09	3.73902144613539e-06	Significant
X3613.62	FCN1	FCN1	-0.0108238	0.00403212	0.0074892	0.0115032	1	Significant
X19274.80	Alpha-1-syntrophin	SNTA1	0.0135865	0.00277598	1.32635852731887e-06	3.77070825350221e-06	0.00472847	Significant
X24318.13	FGD2	FGD2	-0.0106014	0.00271758	0.000107991	0.000221893	0.384989	Significant
X12788.6	SGF29	SGF29	0.00622007	0.00182873	0.000719918	0.00130346	1	Significant
X2567.5	Factor I	CFI	-0.00722575	0.00291803	0.0135795	0.0200045	1	Significant
X6456.17	PSG6	PSG6	-0.00431083	0.00107002	6.41100308589101e-05	0.000136858	0.228552	Significant
X10582.36	SG196	POMK	0.0283115	0.00514548	5.78233376641913e-08	2.10132720461613e-07	0.00020614	Significant
X13650.11	KCIP1	KCNIP1	-0.00761013	0.00260978	0.00369279	0.00597584	1	Significant
X23322.2	MUSC	MSC	0.0302237	0.00550241	6.08690798181761e-08	2.19411799344588e-07	0.000216998	Significant
X18156.7	ATG3	ATG3	-0.0125583	0.00248915	6.19810906939771e-07	1.86309096394628e-06	0.00220963	Significant
X24407.31	KIF3C	KIF3C	-0.00783319	0.00247427	0.00163313	0.00280313	1	Significant
X8921.139	PABP2	PABPN1	-0.0148906	0.00340342	1.46301951153063e-05	3.47479317695316e-05	0.0521566	Significant
X9377.25	SCF	KITLG	0.0188933	0.00697982	0.00700855	0.0108303	1	Significant
X25282.6	AZIN1	AZIN1	-0.0131738	0.00306657	2.06382665283504e-05	4.77142802682031e-05	0.0735754	Significant
X6398.12	LONM	LONP1	-0.00809808	0.00283695	0.00448143	0.00713547	1	Significant
X5260.80	TYK2	TYK2	0.0248158	0.00393954	6.42322141477555e-10	3.26542298747968e-09	2.28987843436748e-06	Significant
X25100.11	CMIP	CMIP	-0.0104201	0.00219502	2.64259745046405e-06	7.06741178612478e-06	0.00942086	Significant
X13098.93	VEGF-D	VEGFD	0.0423927	0.011906	0.000402205	0.000752289	1	Significant
X8890.9	T132B	TMEM132B	0.0754425	0.011678	2.30655505727059e-10	1.26505673525687e-09	8.22286877916965e-07	Significant
X2515.14	GFRa-2	GFRA2	0.0625323	0.0119685	2.48222004096325e-07	8.1259085822167e-07	0.000884911	Significant
X12594.5	GRAN	GCA	-0.00923603	0.00239481	0.000128821	0.000261381	0.459246	Significant
X21540.73	BIN2	BIN2	-0.00936105	0.00214926	1.59235935815866e-05	3.75199015983848e-05	0.0567676	Significant
X2580.83	Myeloperoxidase	MPO	-0.0173318	0.00616853	0.00515528	0.00813932	1	Significant
X24424.25	TBC25	TBC1D25	0.0174819	0.00356674	1.26295177903381e-06	3.59905922642329e-06	0.00450242	Significant
X12684.5	ADSV	SCIN	0.0264523	0.00885308	0.00294001	0.00485237	1	Significant
X23018.4	REG1B	REG1B	-0.0131142	0.00248264	1.85891684876625e-07	6.21090774681507e-07	0.000662704	Significant
X11382.5	BIEA	BLVRA	0.0264284	0.00485158	8.21866902663864e-08	2.89235489436987e-07	0.000292996	Significant
X18449.33	PPIG	PPIG	-0.00965312	0.00309931	0.00193966	0.00330066	1	Significant
X6538.90	K2013	KIAA2013	-0.00760422	0.00220983	0.000624048	0.00114147	1	Significant
X24416.20	SND1	SND1	-0.0130258	0.00229206	2.15396558698431e-08	8.52262743351728e-08	7.67888731759907e-05	Significant
X6406.3	NMES1	NMES1	-0.0170734	0.00784187	0.0299105	0.0416527	1	Significant
X9125.23	MASP3:Sushi 1 and Sushi 2	MASP1	-0.0118536	0.00237724	8.32588797503282e-07	2.43492950213224e-06	0.00296818	Significant
X20522.2	IRPL1	IL1RAPL1	0.0204815	0.00463038	1.17491724717122e-05	2.83779131854024e-05	0.0418858	Significant
X17410.5	CETN3	CETN3	-0.00979933	0.00217243	7.96325114582669e-06	1.97832685260433e-05	0.028389	Significant
X6973.111	IGF-II:Pro-form	IGF2	-0.00909692	0.00405681	0.0253372	0.0356883	1	Significant
X23690.228	RBM41	RBM41	-0.00609371	0.00188219	0.00128008	0.0022414	1	Significant
X16763.11	LECT2	LECT2	-0.0413247	0.012418	0.000935328	0.00166973	1	Significant
X3220.40	RET	RET	0.0322758	0.00862719	0.00020254	0.000396733	0.722054	Significant
X19134.66	RPAB4	POLR2K	0.00809785	0.00237551	0.00070127	0.00127228	1	Significant
X5593.11	PDIA5	PDIA5	-0.010827	0.00215759	7.08012540534437e-07	2.10689875376066e-06	0.00252406	Significant
X6369.82	DEAF1	DEAF1	0.0290764	0.00462188	6.49676517038078e-10	3.29459001883463e-09	2.31609678324075e-06	Significant
X23426.1	VCX1	VCX	0.0123211	0.00343483	0.000364286	0.00068568	1	Significant
X9400.40	Galectin-7	LGALS7	-0.0114244	0.00193283	6.00929677722177e-09	2.5779955488322e-08	2.14231430107956e-05	Significant
X9482.110	NUDT9	NUDT9	0.023934	0.00709197	0.000791671	0.00142325	1	Significant
X13631.1	RB binding protein 5	RBBP5	-0.0108079	0.00208356	3.01851173543026e-07	9.68107123625345e-07	0.0010761	Significant
X13451.2	FNDC4	FNDC4	-0.0164988	0.00352059	3.55456034482602e-06	9.2767259365335e-06	0.012672	Significant
X16913.8	RNT2	RNASET2	0.0196174	0.00781272	0.012331	0.0182786	1	Significant
X8013.9	LMA2L	LMAN2L	0.0352631	0.00582274	2.61423851849813e-09	1.19791263733237e-08	9.31976031844583e-06	Significant
X20982.29	SNR25	SNRNP25	-0.0141903	0.00239386	5.4903773072698e-09	2.37827400977118e-08	1.95731951004168e-05	Significant
X12980.31	RBM22	RBM22	0.0129703	0.00246382	2.03418231242592e-07	6.73964678791673e-07	0.000725186	Significant
X23373.77	DPH5	DPH5	-0.00693077	0.00337456	0.0404733	0.0548413	1	Significant
X7210.25	Amyloid-like protein 1	APLP1	0.0149842	0.00313961	2.33260586139131e-06	6.30936259169956e-06	0.00831574	Significant
X11590.5	RBM23	RBM23	-0.00946372	0.00208485	6.95920024109356e-06	1.73980006027339e-05	0.0248095	Significant
X20225.119	STA5A	STAT5A	-0.00919851	0.0025606	0.000357568	0.000674817	1	Significant
X14309.8	HNRH1	HNRNPH1	-0.00637473	0.00194861	0.00113877	0.00200678	1	Significant
X21647.9	SPEE	SRM	0.00816765	0.00196806	3.8544422508065e-05	8.566762234492e-05	0.137411	Significant
X14057.68	TNFSF15	TNFSF15	-0.00412608	0.00161124	0.0107138	0.0160685	1	Significant
X14081.5	ULBP-1	ULBP1	0.00941535	0.00372074	0.011675	0.0173785	1	Significant
X3045.72	PTN	PTN	0.0184956	0.00451108	4.75928889773933e-05	0.000104283	0.169669	Significant
X6019.12	C1T9A	C1QTNF9	-0.00304293	0.00119079	0.0108797	0.0163035	1	Significant
X6609.22	CN37	CNP	0.0197416	0.00996722	0.0481377	0.0645154	1	Significant
X17195.43	BAG-1	BAG1	-0.0047172	0.00202067	0.01995	0.028586	1	Significant
X24983.119	RB6I2	ERC1	-0.00401289	0.00105446	0.000157501	0.000315799	0.561491	Significant
X18403.25	AMPD2	AMPD2	-0.0113248	0.00221215	4.27745179192165e-07	1.33296465368887e-06	0.00152491	Significant
X18202.22	CD37	CD37	-0.00238592	0.00114876	0.0382825	0.0521502	1	Significant
X2658.27	TrkC	NTRK3	0.0474102	0.00790181	3.5899134257104e-09	1.601757367041e-08	1.27980413626576e-05	Significant
X3887.90	IMB1	KPNB1	0.018187	0.00871736	0.0374632	0.0511514	1	Significant
X20575.82	CLC9A	CLEC9A	0.00648443	0.00214993	0.00268065	0.0044594	1	Significant
X14229.5	MOCS3	MOCS3	-0.00701089	0.00247826	0.00484424	0.00767885	1	Significant
X5508.62	Cathepsin D	CTSD	-0.012163	0.00298623	5.33651852812469e-05	0.000115934	0.190247	Significant
X22378.2	Keratin 34	KRT34	-0.0230239	0.0114473	0.0447835	0.0602465	1	Significant
X16755.195	GDF-3	GDF3	-0.00350735	0.00102215	0.000646878	0.001179	1	Significant
X8702.42	OSCAR	OSCAR	0.00468947	0.00107784	1.62183289741258e-05	3.81639226354841e-05	0.0578183	Significant
X8406.17	IGF-I	IGF1	0.00910146	0.00223535	5.36800085268052e-05	0.000116546	0.191369	Significant
X25083.26	Diaphanous-related formin-1	DIAPH1	0.010029	0.00214537	3.74067752360252e-06	9.73395282601678e-06	0.0133355	Significant
X15403.53	ID2	ID2	-0.00850598	0.00212353	7.05182252491342e-05	0.000149197	0.251397	Significant
X7018.10	TSR3	TSR3	-0.00432621	0.00179433	0.0162474	0.0236705	1	Significant
X3329.14	PGRP-S	PGLYRP1	-0.0145282	0.00504715	0.00416248	0.00666035	1	Significant
X10833.64	HHIP	HHIP	0.0428652	0.0106278	6.27859915813969e-05	0.000134434	0.223832	Significant
X15606.19	Keratin 19	KRT19	-0.019625	0.0046676	3.06508851310142e-05	6.90620534009064e-05	0.10927	Significant
X3827.22	PAK6	PAK6	0.0201586	0.00727119	0.00575345	0.00900792	1	Significant
X5124.62	sICAM-5	ICAM5	0.0670746	0.011254	4.51587568441005e-09	1.99740655271983e-08	1.60990968149218e-05	Significant
X25460.36	IRF5	IRF5	-0.00484083	0.00137693	0.000475322	0.000882104	1	Significant
X4906.35	Coagulation Factor V	F5	-0.0293274	0.00916184	0.00144943	0.00251323	1	Significant
X19281.86	MAFG	MAFG	-0.00971613	0.0017634	5.56187167064132e-08	2.03364846213706e-07	0.000198281	Significant
X6324.11	DNSL2	DNASE1L2	0.0515778	0.00716171	1.99187329117758e-12	1.3735064377269e-11	7.10102828304807e-09	Significant
X23666.35	PUR9	ATIC	0.023461	0.00957548	0.0146252	0.0214298	1	Significant
X21661.82	DMP4	FAM20C	0.0370164	0.00671173	5.37638188677803e-08	1.97392393680367e-07	0.000191668	Significant
X9372.157	MPZL2	MPZL2	-0.0104882	0.00298636	0.000482265	0.000893129	1	Significant
X3623.84	LY86	LY86	0.0137423	0.00698736	0.0497206	0.0665118	1	Significant
X3499.77	IL-17B	IL17B	0.01519	0.00470416	0.00131906	0.00230287	1	Significant
X18347.15	Laminin-2	LAMA2|LAMB1|LAMC1	0.0163355	0.00525357	0.00197271	0.0033489	1	Significant
X20141.42	TCEA2	TCEA2	-0.0132586	0.00346156	0.000143396	0.000289635	0.511206	Significant
X25074.119	GLPK5	GK5	-0.00758744	0.00290449	0.00924218	0.0140027	1	Significant
X8092.29	IL-6 sRa	IL6R	0.0336023	0.00926358	0.000313044	0.000596474	1	Significant
X15381.45	Discoidin domain receptor 2	DDR2	0.0177966	0.00443771	6.90817013729848e-05	0.000146506	0.246276	Significant
X10970.3	NAR3	ART3	0.0535321	0.00935654	1.74033532079916e-08	6.98681916514528e-08	6.20429541864901e-05	Significant
X4876.32	Coagulation Factor IX	F9	-0.0237621	0.00906251	0.00898433	0.013641	1	Significant
X8565.160	PLVAP	PLVAP	-0.0124248	0.00200756	1.19240381204323e-09	5.77570596458439e-09	4.25091958993411e-06	Significant
X3839.60	AIP	AIP	-0.0105381	0.0024627	2.21810259051082e-05	5.09834670223796e-05	0.0790754	Significant
X25051.104	FTO	FTO	0.0231665	0.00441631	2.27507388006493e-07	7.49596893015848e-07	0.000811064	Significant
X21272.100	CN166	RTRAF	-0.011831	0.00390416	0.00256198	0.00428198	1	Significant
X14689.3	SEC13	SEC13	0.0436776	0.00686568	4.24660072753396e-10	2.21009220345381e-09	1.51391315936586e-06	Significant
X23543.92	TRUB1	TRUB1	0.00622012	0.00206291	0.0026925	0.00447703	1	Significant
X15487.164	carboxylesterase, liver	CES1	-0.00485543	0.00137365	0.000443705	0.000825578	1	Significant
X11257.1	DHPR	QDPR	0.0192968	0.00673203	0.00431158	0.0068773	1	Significant
X5861.78	3HAO	HAAO	0.0209391	0.00885968	0.0184744	0.0265998	1	Significant
X13950.9	C43BP:START domain	CERT1	0.0228509	0.00539299	2.66208145877132e-05	6.05250025543352e-05	0.0949032	Significant
X9504.19	RB27A	RAB27A	0.0137738	0.00462539	0.00303506	0.00499307	1	Significant
X22987.69	JNK2	MAPK9	-0.00655633	0.00186666	0.000481605	0.000892371	1	Significant
X3056.11	NKG2D	KLRK1	-0.00814027	0.00216257	0.0001855	0.000366046	0.661308	Significant
X9030.56	CQ089	NDUFAF8	0.00699823	0.00117622	4.7970503924343e-09	2.10321765762731e-08	1.71014846490283e-05	Significant
X2057.6	No Protein		-0.0119586	0.00273424	1.46512763534501e-05	3.47516967398866e-05	0.0522318	Significant
X2876.74	Topoisomerase I	TOP1	-0.0130255	0.00242039	1.0999953394996e-07	3.80726542263696e-07	0.000392148	Significant
X3067.67	GDF-9	GDF9	-0.0125439	0.00270635	4.4878246897259e-06	1.14936027434431e-05	0.0159991	Significant
X7935.26	LARGE	LARGE1	0.0729515	0.0124681	8.52682630148121e-09	3.58046357653481e-08	3.03981357647805e-05	Significant
X5741.55	ECP	RNASE3	0.0287875	0.0134143	0.0323116	0.0446304	1	Significant
X11372.2	ZNF18	ZNF18	0.00800775	0.00375243	0.0333007	0.0458721	1	Significant
X15553.22	ACES	ACHE	0.0130294	0.00356099	0.00028479	0.00054526	1	Significant
X4918.21	Kininogen, HMW	KNG1	-0.00561516	0.00129709	1.78677714114154e-05	4.16058818299777e-05	0.0636986	Significant
X12882.7	PAR11	PARP11	-0.0122816	0.00241995	5.31991946883523e-07	1.62237065067559e-06	0.00189655	Significant
X9898.161	ARI1A	ARID1A	-0.0140654	0.00399062	0.000461077	0.000857007	1	Significant
X13740.51	sFRP-3	FRZB	0.0165233	0.00602137	0.00627009	0.00975682	1	Significant
X10496.11	CaCC	CLCA1	-0.00980262	0.00226931	1.85856052850258e-05	4.31646142287407e-05	0.0662577	Significant
X12599.10	URP2	FERMT3	0.0164787	0.00526344	0.00183723	0.00314135	1	Significant
X7249.37	B2L10	BCL2L10	-0.0123294	0.00411282	0.00284665	0.00470482	1	Significant
X18909.11	EXOS8	EXOSC8	-0.0074208	0.00157598	3.16933974247994e-06	8.33852116748412e-06	0.0112987	Significant
X4551.72	GP114	ADGRG5	-0.01106	0.00264782	3.44263559178195e-05	7.70096004776853e-05	0.12273	Significant
X3037.62	IL-1b	IL1B	-0.0132804	0.00276893	2.09232293707964e-06	5.73338299053721e-06	0.00745913	Significant
X18871.24	AIF1L	AIF1L	0.0411988	0.0078786	2.43203318351171e-07	7.97626338474632e-07	0.00086702	Significant
X3477.63	TrkA	NTRK1	-0.0137196	0.0021352	2.89065326830627e-10	1.55493470901938e-09	1.03051789015119e-06	Significant
X13570.43	VIGLN	HDLBP	0.00437222	0.00211103	0.0388273	0.0528116	1	Significant
X18195.3	ORAV1	LTO1	-0.0151073	0.00477133	0.00163174	0.00280209	1	Significant
X12493.42	OTUB2	OTUB2	-0.00546529	0.0018402	0.00310952	0.00509441	1	Significant
X21430.4	cPLA2-alpha	PLA2G4A	0.0231172	0.00929904	0.0132186	0.0195132	1	Significant
X14331.262	DYLT1	DYNLT1	-0.0126258	0.00243477	3.0645328049088e-07	9.80705516113094e-07	0.00109251	Significant
X25438.288	NT5D1	NT5DC1	0.00750164	0.00147656	5.20349315060754e-07	1.59336735016377e-06	0.00185505	Significant
X22465.43	HES1	HES1	-0.00923247	0.00312436	0.0032642	0.00532093	1	Significant
X9723.105	EMILIN-3	MMRN2	-0.00838971	0.00307184	0.00651889	0.0101131	1	Significant
X21987.76	LPL	LPL	0.0690197	0.0100248	1.58626094839944e-11	9.97358074258202e-11	5.655020281044e-08	Significant
X6362.6	AUGN	ECRG4	-0.00736781	0.00254326	0.00392159	0.00631458	1	Significant
X19636.23	HLA-G	HLA-G	0.0614436	0.0096315	3.78862999029646e-10	2.00008588037288e-09	1.35064659154069e-06	Significant
X4460.8	PDPK1	PDPK1	-0.0097047	0.00253021	0.000139997	0.000283252	0.49909	Significant
X15587.20	FOLR2	FOLR2	0.0410018	0.00827747	9.73318401415587e-07	2.82333612778403e-06	0.00346988	Significant
X12389.4	ORC6	ORC6	-0.00717239	0.00213917	0.000857201	0.00153487	1	Significant
X15427.35	LOXL3	LOXL3	0.0119565	0.00537663	0.0265758	0.0372417	1	Significant
X3629.60	MRCKB	CDC42BPB	-0.0122442	0.00312697	0.000101957	0.000209981	0.363477	Significant
X22589.3	FZD2	FZD2	0.0354507	0.00766762	4.71635033550857e-06	1.20521094138009e-05	0.0168138	Significant
X6913.189	HMG-2	HMGB2	-0.0135285	0.00241203	3.25713593910697e-08	1.25021535478211e-07	0.000116117	Significant
X24496.26	RIPL1	RILPL1	-0.00671618	0.00239141	0.0051618	0.008146	1	Significant
X7803.4	CHST1	CHST1	0.0178169	0.00306325	1.0297879073546e-08	4.28877790855041e-08	3.67119388971915e-05	Significant
X15462.28	CD8A	CD8A	0.0263595	0.0108046	0.0150153	0.0219834	1	Significant
X9457.3	CAV2	CAV2	-0.00314168	0.00156576	0.0453379	0.0609464	1	Significant
X8245.27	sICAM-5	ICAM5	0.0344911	0.00777663	1.11117107851848e-05	2.69845020089808e-05	0.0396132	Significant
X3322.52	LRIG3	LRIG3	0.0266759	0.00592659	8.29698630356073e-06	2.05693714688414e-05	0.0295788	Significant
X21395.23	PCD17	PCDH17	0.0512375	0.00921718	4.23775145246685e-08	1.59027199242572e-07	0.000151076	Significant
X9043.7	TFP11	TFIP11	-0.0106174	0.00504675	0.0358614	0.049096	1	Significant
X6035.2	SIAT1	ST6GAL1	-0.0100004	0.00233987	2.26783533095597e-05	5.20929958431574e-05	0.0808483	Significant
X12373.73	TRA2B	TRA2B	0.00798005	0.0029646	0.00732572	0.0112862	1	Significant
X12504.26	LMOD1	LMOD1	0.00790967	0.00194376	5.450626041604e-05	0.000118053	0.194315	Significant
X12425.104	ARF6	ARF6	0.00474307	0.00152161	0.00192378	0.00327677	1	Significant
X2944.66	DAN	NBL1	0.0611116	0.0152745	7.17751196733189e-05	0.000151407	0.255878	Significant
X10980.11	ACES	ACHE	0.0718605	0.0118188	2.5367709989501e-09	1.16691465951705e-08	9.04358861125711e-06	Significant
X7870.8	CNDP1	CNDP1	0.0312855	0.0102052	0.00227859	0.00383711	1	Significant
X22500.9	MED11	MED11	0.00831654	0.00251248	0.000994554	0.00176925	1	Significant
X13580.2	Sperm-associated antigen 2	UAP1	0.00807758	0.00213554	0.000173016	0.000343432	0.616804	Significant
X4546.27	EMR2	ADGRE2	0.0174192	0.00780343	0.0260045	0.0365128	1	Significant
X8376.25	LSHB	LHB	-0.00430886	0.00179089	0.0164666	0.0239509	1	Significant
X14036.116	MPDZ	MPDZ	0.0032546	0.00150612	0.0311333	0.0431365	1	Significant
X25236.11	MTL26	METTL26	-0.00310791	0.00129965	0.0171333	0.0248294	1	Significant
X18193.165	MO4L1	MORF4L1	-0.010073	0.0018004	3.50841111480244e-08	1.33913122315532e-07	0.000125075	Significant
X3620.67	IL22RA1	IL22RA1	-0.0106244	0.00308986	0.0006313	0.00115296	1	Significant
X22516.30	NRL	NRL	-0.0109155	0.00349044	0.00185906	0.00317563	1	Significant
X10539.30	C99L2	CD99L2	-0.0101866	0.00219576	4.39593309320184e-06	1.13151635214907e-05	0.0156715	Significant
X11109.56	SVEP1:Sushi 15-18	SVEP1	0.038628	0.00700854	5.49059041750957e-08	2.01171169973501e-07	0.00019574	Significant
X9416.77	CBPM	CPM	0.0335446	0.00864557	0.000117197	0.00023943	0.417806	Significant
X4493.92	IL-11	IL11	-0.0080599	0.00357742	0.0246587	0.0348013	1	Significant
X15310.61	PRC1	PRC1	-0.0134773	0.0023949	2.93518089130702e-08	1.13738259538147e-07	0.000104639	Significant
X16620.26	LY75	LY75	0.0588679	0.0105108	3.4039697056199e-08	1.30345349092749e-07	0.000121352	Significant
X7835.2	BNI3L	BNIP3L	0.00590312	0.00114516	3.57344413590787e-07	1.13541250842349e-06	0.00127393	Significant
X9842.2	b-Catenin	CTNNB1	0.00939569	0.00211021	1.03295828184252e-05	2.52225772244424e-05	0.036825	Significant
X9748.31	GSTM3-3	GSTM3	0.01888	0.00468136	6.31874132596771e-05	0.000135131	0.225263	Significant
X25949.3	PLCD3	PLCD3	-0.0105759	0.00196703	1.13576149987376e-07	3.91964157507256e-07	0.000404899	Significant
X5337.64	B7-2	CD86	0.0062196	0.00229928	0.00704934	0.0108839	1	Significant
X6223.5	GUC2B	GUCA2B	-0.00708944	0.00265896	0.00790026	0.0120826	1	Significant
[truncated: 1,567 more rows]

## Sheet: ST3_Meta-analysis
Supplementary Table 3: Meta-analysis of discovery (stage 1) and replication (stage 2) differential abundance analysis.
	Discovery								Replication								Meta-analysis
Analyte	Target.x	EntrezGeneSymbol.x	Estimate.x	Standard_error.x	Pvalue.x	FDR.x	bonferroni.x	diffexpressed.x	Target.y	EntrezGeneSymbol.y	Estimate.y	Standard_error.y	Pvalue.y	FDR.y	bonferroni.y	diffexpressed.y	weightedZ	weightedZ_FDR	weightedZ_bonf
X5694.57	SMOC1	SMOC1	0.183469	0.00518156	3.92808e-185	2.76104e-181	2.76104e-181	Significant	SMOC1	SMOC1	0.194839	0.00789965	7.26063e-91	1.29421e-87	2.58842e-87	Significant	1.6166e-211	2.0555e-208	4.11101e-208
X4179.57	14-3-3 protein gamma	YWHAG	0.221821	0.00632764	1.15874e-182	4.0724e-179	8.1448e-179	Significant	14-3-3 protein gamma	YWHAG	0.248415	0.00940613	6.17828e-100	2.20256e-96	2.20256e-96	Significant	1.26265e-222	3.21092e-219	3.21092e-219
X12853.112	TMOD2	TMOD2	0.0485709	0.00143803	1.6574e-172	3.88328e-169	1.16498e-168	Significant	TMOD2	TMOD2	0.0481078	0.00246823	1.07429e-64	2.94604e-62	3.82985e-61	Significant	9.12167e-169	3.86607e-166	2.31964e-165
X12414.31	14-3-3 protein beta/alpha	YWHAB	0.152598	0.00482279	1.00908e-157	1.7732e-154	7.0928e-154	Significant	14-3-3 protein beta/alpha	YWHAB	0.167435	0.00748475	2.39521e-79	2.13473e-76	8.53892e-76	Significant	1.36756e-182	8.69425e-180	3.4777e-179
X15545.13	Calcineurin B a	PPP3R1	0.109961	0.00359977	1.24394e-149	1.74874e-146	8.74368e-146	Significant	Calcineurin B a	PPP3R1	0.121535	0.00585037	4.84884e-71	2.16076e-68	1.72861e-67	Significant	2.58838e-167	9.40321e-165	6.58225e-164
X13118.5	SMOC1	SMOC1	0.115941	0.00381365	1.12145e-148	1.31378e-145	7.88267e-145	Significant	SMOC1	SMOC1	0.113203	0.00533684	2.37736e-73	1.41255e-70	8.4753e-70	Significant	4.86174e-170	2.47268e-167	1.23634e-166
X12861.13	TMOD3	TMOD3	0.112594	0.0038682	3.18489e-139	3.19808e-136	2.23866e-135	Significant	TMOD3	TMOD3	0.121322	0.00618911	3.14019e-65	1.01771e-62	1.11948e-61	Significant	2.37914e-154	6.05014e-152	6.05014e-151
X19620.16	DLG2	DLG2	0.133714	0.00461113	1.95666e-138	1.71917e-135	1.37534e-134	Significant	DLG2	DLG2	0.166348	0.00836621	1.21889e-66	4.34533e-64	4.34533e-63	Significant	6.28124e-156	1.7748e-153	1.59732e-152
X5858.6	14-3-3 protein zeta/delta	YWHAZ	0.133494	0.00463217	2.59653e-137	2.02789e-134	1.8251e-133	Significant	14-3-3 protein zeta/delta	YWHAZ	0.143829	0.00597695	5.98011e-88	7.10636e-85	2.13191e-84	Significant	7.35972e-184	6.23859e-181	1.87158e-180
X14157.21	14-3-3E	YWHAE	0.11635	0.00406362	6.17449e-136	4.34005e-133	4.34005e-132	Significant	14-3-3E	YWHAE	0.124871	0.00582198	1.89347e-74	1.35005e-71	6.75023e-71	Significant	2.44834e-165	7.78265e-163	6.22612e-162
X16885.49	MARE3	MAPRE3	0.0990509	0.00359709	1.07637e-127	6.87799e-125	7.56579e-124	Significant	MARE3	MAPRE3	0.120235	0.00630865	1.94999e-62	4.63447e-60	6.95171e-59	Significant	4.99424e-145	1.15458e-142	1.27003e-141
X25219.17	VATF	ATP6V1F	0.0815698	0.00301062	1.08168e-124	6.33593e-122	7.60311e-121	Significant	VATF	ATP6V1F	0.0898881	0.0050874	1.96657e-55	2.92118e-53	7.01083e-52	Significant	6.84185e-134	9.66601e-132	1.73988e-130
X19229.92	HOME1	HOMER1	0.0587869	0.0022184	3.4875e-120	1.88566e-117	2.45136e-116	Significant	HOME1	HOMER1	0.057481	0.00330871	1.00414e-53	1.05287e-51	3.57977e-50	Significant	2.10212e-129	2.67285e-127	5.34569e-126
X15474.7	PIN1	PIN1	0.0704592	0.00268862	2.33323e-118	1.17145e-115	1.64002e-114	Significant	PIN1	PIN1	0.0808709	0.00411671	8.06906e-65	2.39718e-62	2.87662e-61	Significant	9.78592e-144	2.0738e-141	2.48856e-140
X22430.15	CHIN	CHN1	0.0622066	0.00237829	1.75786e-117	8.23732e-115	1.2356e-113	Significant	CHIN	CHN1	0.072415	0.00381923	1.47451e-61	2.92034e-59	5.25662e-58	Significant	6.58599e-139	1.04676e-136	1.67482e-135
X24717.26	PTPA	PTPA	0.135961	0.00525531	3.34962e-116	1.47153e-113	2.35445e-112	Significant	PTPA	PTPA	0.159101	0.00838608	9.74689e-62	2.09943e-59	3.47477e-58	Significant	1.58474e-138	2.37058e-136	4.02999e-135
X14675.20	IF4B	EIF4B	0.0465743	0.00180965	8.77103e-115	3.62656e-112	6.16516e-111	Significant	IF4B	EIF4B	0.0559003	0.00287251	1.15018e-63	2.92884e-61	4.10038e-60	Significant	2.01904e-140	3.42294e-138	5.13441e-137
X21140.19	CAMLG	CAMLG	0.0469845	0.00183897	1.28661e-113	5.02422e-111	9.04359e-110	Significant	CAMLG	CAMLG	0.0388002	0.00279802	1.57972e-37	5.46768e-36	5.63171e-34	Significant	5.02219e-103	2.8381e-101	1.27714e-99
X17706.4	PPR1A	PPP1R1A	0.0866159	0.00339251	1.49572e-113	5.53338e-111	1.05134e-109	Significant	PPR1A	PPP1R1A	0.0871548	0.00607286	8.61738e-40	3.16711e-38	3.0721e-36	Significant	2.2375e-106	1.3878e-104	5.68997e-103
X14156.33	14-3-3 protein beta/alpha	YWHAB	0.118099	0.00471381	1.77964e-110	6.25453e-108	1.25091e-106	Significant	14-3-3 protein beta/alpha	YWHAB	0.131006	0.00652231	9.63586e-68	3.81687e-65	3.43519e-64	Significant	1.17502e-143	2.29851e-141	2.98807e-140
X22968.9	GGE2D	GAGE2D	0.0774775	0.00310714	4.34895e-109	1.45566e-106	3.05688e-105	Significant	GGE2D	GAGE2D	0.0837005	0.00447935	2.79424e-60	5.24288e-58	9.96147e-57	Significant	4.55751e-133	6.09986e-131	1.15897e-129
X24637.3	TCAL5	TCEAL5	0.138584	0.00571746	1.20069e-104	3.8362e-102	8.43964e-101	Significant	TCAL5	TCEAL5	0.148387	0.00846169	6.658e-55	9.12915e-53	2.37358e-51	Significant	1.20548e-123	1.33284e-121	3.06553e-120
[truncated: 2,151 more rows]

## Sheet: ST4_Model_Weights
Supplementary Table 4: Regression model weights for the 11 analyte AD prediction model.
[truncated: 15 more rows]

[truncated: 12 more sheets: ST5_AD_Prediction_Model, ST6_Clustering, ST7_Pathway_Enrichment_G1, ST8_Pathway_Enrichment_G2, ST9_Pathway_Enrichment_G3, ST10_Pathway_Enrichment_G4, ST11_AD_Prediction_Model, ST12_KEGG_Enrichment_Global, ST13_Reactome_Enrichment_Global, ST14_GO_Enrichment_Global, ST15_DO_Enrichment_Global, ST16_CSF_Plasma]
